# Supplementary material for: Metabolomic Profile at Birth, Bronchiolitis and Recurrent Wheezing: A 3-Year Prospective Study
Source: MDPI journal article supplement (doi:10.3390/metabo11120825), 2021-11-30
Supplement: s1 [file s1]

## SUPPLEMENTARY MATERIALS

**Figure S1.** Score scatter plots of the PCA models obtained considering the POS dataset (panel A) and the NEG dataset (panel B). The source of data variation associated to the analytical session (represented by the QCs reported with red circles) is negligible when compared to the biological variability of the urine samples. Samples are represented using different symbols and colors according to their group (see legend).

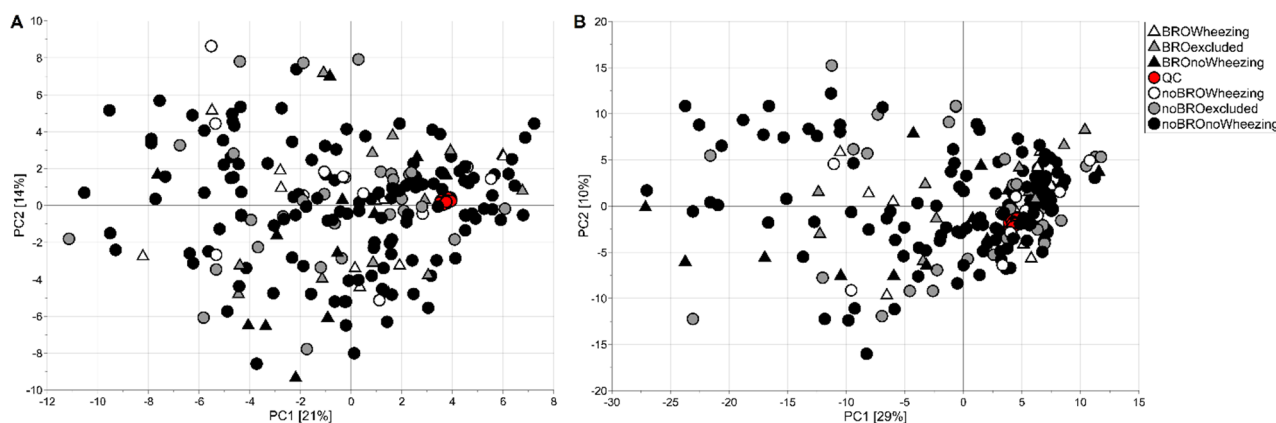

**Table S1.** Respiratory Symptoms of the 205 children enrolled in the study.

|                                                            | Number of children (%) |
|------------------------------------------------------------|------------------------|
| Bronchiolitis in the first year of life                    | 35 (17%)               |
| No episodes of wheezing                                    | 142 (69,2%)            |
| Wheezing (1 or 2 episodes) in the first 3 years of life    | 39 (19%)               |
| Wheezing (3 or more episodes) in the first 3 years of life | 24 (11,7%)             |

**Table S3.** Compounds of the Standard Mix.

| description        | Retention time [min] | Neutral mass | concentration [ $\mu$ M] |
|--------------------|----------------------|--------------|--------------------------|
| Sulfaguanidine     | 0.98                 | 214.05252    | 37                       |
| Acetaminophen      | 2.62                 | 151.06342    | 33                       |
| Hippuric acid      | 3.61                 | 179.05882    | 120                      |
| Caffeine           | 3.92                 | 194.08042    | 25                       |
| Leucine Enkephalin | 4.95                 | 555.26932    | 0.90                     |
| Sulfadimethoxine   | 5.00                 | 310.07362    | 4.0                      |
| Verapamil          | 5.41                 | 454.28322    | 0.40                     |
| Terfenadine        | 6.00                 | 471.31382    | 2.0                      |
| Cholic Acid        | 6.99                 | 408.286976   | 0.60                     |

**Table S4.** Number of features after each step of data pre-processing.

|                       | positive ionization mode | negative ionization mode |
|-----------------------|--------------------------|--------------------------|
| extracted features    | 6849                     | 5709                     |
| <b>filter</b>         |                          |                          |
| missing values in QCs | 6702                     | 5491                     |
| 95° BLK/5° QC>0.20    | 4907                     | 4473                     |
| CV QC>20%             | 1204                     | 2047                     |
| CV QC after PQN<20%   | 1196                     | 1984                     |

**Table S5.** Parameters of the best PLS for classification model obtained for untargeted metabolomics data; A is the number of latent variables, N features is the number of relevant features, MCCcv is the Matthew correlation coefficient calculated by 50-repeated 5-fold cross-validation and MCCoob is the median MCC calculated considering the out-of-bag observations during stability selection.

| model                                                             | dataset | A | N features | MCC          | MCCcv        | MCCoob |
|-------------------------------------------------------------------|---------|---|------------|--------------|--------------|--------|
| bronchiolitis (N=35) vs no bronchiolitis (N=42)                   | POS     | 1 | 98         | 0.28 (0.42)  | 0.25 (0.010) | 0.21   |
| bronchiolitis (N=35) vs no bronchiolitis (N=42)                   | NEG     | 1 | 176        | 0.27 (0.36)  | 0.22 (0.040) | 0.14   |
| bronchiolitis: recurrent wheezing (N=11) vs no wheezing (N=13)    | POS     | 1 | 78         | 0.77 (0.010) | 0.44 (0.035) | 0.00   |
| bronchiolitis: recurrent wheezing (N=11) vs no wheezing (N=13)    | NEG     | 1 | 139        | 0.17 (0.96)  | 0.09 (0.38)  | 0.04   |
| no bronchiolitis: recurrent wheezing (N=13) vs no wheezing (N=15) | POS     | 1 | 84         | 0.57 (0.082) | 0.36 (0.060) | 0.25   |
| no bronchiolitis: recurrent wheezing (N=13) vs no wheezing (N=16) | NEG     | 1 | 185        | 0.53 (0.066) | 0.48 (0.022) | 0.46   |

**Table S6.** Parameters of the best RF obtained for untargeted metabolomics data; ntree is the number of trees of the forest, mtry is the number of variables randomly sampled as candidates at each split, node size is minimum size of terminal nodes, MCCoob is the Matthew correlation coefficient calculated by out-of-bag prediction.

| model                                                             | dataset | mtry | ntree | node size | MCC         | MCCoob       |
|-------------------------------------------------------------------|---------|------|-------|-----------|-------------|--------------|
| bronchiolitis (N=35) vs no bronchiolitis (N=42)                   | POS     | 69   | 400   | 5         | 1.00 (0.99) | 0.32 (0.010) |
| bronchiolitis (N=35) vs no bronchiolitis (N=42)                   | NEG     | 72   | 1000  | 18        | 0.90 (0.98) | 0.19 (0.12)  |
| bronchiolitis: recurrent wheezing (N=11) vs no wheezing (N=13)    | POS     | 56   | 200   | 4         | 1.00 (0.99) | 0.21 (0.035) |
| bronchiolitis: recurrent wheezing (N=11) vs no wheezing (N=13)    | NEG     | 89   | 400   | 6         | 1.00 (0.99) | 0.27 (0.12)  |
| no bronchiolitis: recurrent wheezing (N=13) vs no wheezing (N=15) | POS     | 30   | 400   | 2         | 1.00 (0.99) | 0.37 (0.025) |
| no bronchiolitis: recurrent wheezing (N=13) vs no wheezing (N=16) | NEG     | 45   | 1000  | 4         | 1.00 (0.99) | 0.48 (0.019) |
