# Supplementary material for: Metabolomic Profile at Birth, Bronchiolitis and Recurrent Wheezing: A 3-Year Prospective Study
Source: Metabolites. 2021 Nov 30;11(12):825. doi: 10.3390/metabo11120825 (PMC8706329; doi:10.3390/metabo11120825)
Supplement: Supplementary file 1 [file metabolites-11-00825-s001.zip › data.xlsx]

## Sheet: POS_dataset
group[Bronchiolite]			Blank	Blank	Blank	Blank	Blank	Blank	Blank	Blank	Blank	Blank	Blank	Blank	Blank	Blank	Blank	Blank	Blank	Blank	Blank	Blank	Blank	QC	QC	QC	QC	QC	QC	QC	QC	QC	QC	QC	QC	QC	QC	QC	QC	QC	QC	QC	QC	QC	BRO	noBRO	noBRO	noBRO	noBRO
group[Wheezing]			Blank	Blank	Blank	Blank	Blank	Blank	Blank	Blank	Blank	Blank	Blank	Blank	Blank	Blank	Blank	Blank	Blank	Blank	Blank	Blank	Blank	QC	QC	QC	QC	QC	QC	QC	QC	QC	QC	QC	QC	QC	QC	QC	QC	QC	QC	QC	QC	QC	Wheezing	noWheezing	noWheezing	noWheezing	noWheezing
variableID	m/z	Rt	BMTP1001	BMTP1002	BMTP1003	BMTP1004	BMTP1005	BMTP1006	BMTP1007	BMTP1008	BMTP1009	BMTP1010	BMTP1011	BMTP1012	BMTP1013	BMTP1014	BMTP1015	BMTP1016	BMTP1017	BMTP1018	BMTP1019	BMTP1020	BMTP1021	QMTP1001	QMTP1002	QMTP1003	QMTP1004	QMTP1005	QMTP1006	QMTP1007	QMTP1008	QMTP1009	QMTP1010	QMTP1011	QMTP1015	QMTP1016	QMTP1017	QMTP1018	QMTP1019	QMTP1020	QMTP1021	QMTP1022	QMTP1023	QMTP1024	UMTP1001	UMTP1002	UMTP1003	UMTP1004	UMTP1005
1.10_343.1631m/z	343.163	1.10375	0	0	0	0	0	0	0	0	0	0	0	0	0	0	0	0	0	0	0	0	0	323.594	303.528	303.161	295.094	292.888	252.845	237.43	212.739	225.426	200.851	208.791	168.652	143.828	156.07	155.146	149.893	151.741	153.587	158.616	154.738	147.485	674.591	148.245	205.188	457.433	181.953
0.84_525.1686m/z	525.169	0.842967	0	0	0	0	0	0	0	0	0	0	0	0	0	0	0	0	0	0	0	0	0	307.16	297.292	302.159	294.293	299.621	212.473	234.799	195.602	211.329	191.144	191.352	147.991	136.016	128.429	125.022	111.288	118.013	119.527	112.254	107.787	121.137	819.589	166.135	222.069	574.527	473.423
0.84_363.1153m/z	363.115	0.842967	0	0	0	0	0	0	0	0	0	0	0	0	0	0	0	0	0	0	0	0	0	185.705	166.61	169.617	165.74	176.467	128.453	141.986	127.243	129.849	119.121	126.312	88.2255	75.8889	73.3887	71.0104	69.2671	62.8236	65.921	56.9938	67.0372	74.862	517.423	119.207	123.517	328.825	245.511
0.80_456.6350m/z	456.635	0.799733	0	0	0	0	0	0	0	0	0	0	0	0	0	0	0	0	0	0	0	0	0	101.584	100.655	94.6462	94.5725	106.514	127.061	106.806	101.785	98.6409	87.9351	101.475	69.8597	55.6272	58.9117	61.5845	60.7017	72.4807	74.5875	65.151	56.5369	52.5417	210.789	83.0811	71.9804	219.359	103.329
0.89_538.9887m/z	538.989	0.891617	0	0	0	0	0	0	0	0	0	0	0	0	0	0	0	0	0	0	0	0	0	146.858	148.023	154.33	142.805	142.449	98.8026	101.462	83.6734	91.1997	62.5015	80.5144	64.4527	83.3405	77.476	68.8299	63.0998	61.9774	85.1885	58.4729	64.611	81.0734	156.251	40.714	72.4167	112.793	33.4373
0.88_112.8965m/z	112.897	0.8808	0	0	0	0	0	0	0	0	0	0	0	0	0	0	0	0	0	0	0	0	0	80.3602	80.4322	81.0617	73.4927	81.6161	50.002	70.7903	56.9408	63.5887	59.5426	48.3616	31.3975	51.8414	51.2056	52.799	43.0692	46.4338	52.4781	54.9297	48.8309	50.2805	53.4258	0	186.074	208.302	59.1844
0.90_544.0507m/z	544.051	0.897017	0	0	0	0	0	0	0	0	0	0	0	0	0	0	0	0	0	0	0	0	0	105.931	79.1524	96.3541	92.4464	94.8648	55.8745	48.7186	58.1113	44.0558	32.6352	40.4602	44.0448	38.1321	43.1671	40.3511	36.7701	41.033	39.6593	39.2667	32.9446	37.8836	88.7817	81.6904	71.6272	67.1576	42.8094
1.04_341.1025m/z	341.103	1.0355	0	0	0	0	0	0	0	0	0	0	0	0	0	0	0	0	0	0	0	0	0	104.709	93.6966	90.2299	106.155	94.7295	83.6775	93.6551	67.28	70.2116	71.0909	65.3392	41.2155	32.0728	32.9544	36.1889	38.2682	37.1038	42.3415	35.2555	37.4624	37.6052	165.21	43.3241	82.7586	137.106	96.4151
0.95_336.1372m/z	336.137	0.95445	0	0	0	0	0	0	0	0	0	0	0	0	0	0	0	0	0	0	0	0	0	95.3675	87.1089	94.4259	88.6273	82.938	82.5951	76.5211	67.8869	67.0249	60.6711	69.1359	47.8543	39.7246	41.2945	42.5066	32.1347	39.1544	38.671	34.6093	38.4072	46.2471	131.685	48.5042	69.0912	121.315	70.4316
1.94_307.1229m/z	307.123	1.94413	0	0	0	0	0	0	0	0	0	0	0	0	0	0	0	0	0	0	0	0	0	86.6236	83.6519	87.8286	85.5531	80.7241	56.8241	58.9582	51.3877	61.9725	53.2761	47.0697	33.0042	37.0504	41.5464	44.7087	36.9909	38.9484	43.5018	41.0073	44.7811	41.4778	157.447	37.7801	35.202	133.258	54.7869
0.88_804.7505m/z	804.751	0.8754	0	0	0	0	0	0	0	0	0	0	0	0	0	0	0	0	0	0	0	0	0	83.9669	83.1359	90.6174	107.949	88.6547	52.3406	74.0739	80.0658	74.0987	62.8305	65.3955	40.0648	40.0139	50.3655	42.112	21.4074	38.9101	32.8061	36.3796	27.0333	41.152	87.1369	7.42038	67.5186	134.861	64.3866
3.24_503.4932m/z	503.493	3.23583	0	0	0	0	0	0	0	0	0	0	0	0	0	0	0	0	0	0	0	0	0	60.5898	67.8562	73.3856	61.3024	64.6729	46.8426	47.4668	63.1749	64.9876	42.1498	40.1449	36.519	27.6839	30.0904	26.834	34.1237	29.1373	32.9949	37.9296	31.3204	22.9659	187.976	32.018	17.641	118.796	22.465
0.95_361.1105m/z	361.11	0.95445	0	0	0	0	0	0	0	0	0	0	0	0	0	0	0	0	0	0	0	0	0	69.8985	54.5621	53.0953	45.9812	60.8393	54.0361	47.0758	42.5605	33.157	40.9539	38.3845	28.4622	14.6538	22.7575	24.2062	16.9265	21.2059	23.4154	18.2157	23.7385	27.5944	114.176	25.7044	28.1336	89.477	30.6914
0.84_687.1388m/z	687.139	0.837567	0	0	0	0	0	0	0	0	0	0	0	0	0	0	0	0	0	0	0	0	0	104.741	73.7847	93.2814	70.2608	87.4626	68.1504	69.2865	47.8431	64.6601	52.7329	56.5851	36.5704	27.5137	21.9588	16.5219	20.6769	25.7149	28.707	20.6496	16.2207	19.5011	150.589	42.1034	63.3164	133.693	51.6936
0.88_114.8938m/z	114.894	0.8808	0	0	0	0	0	0	0	0	0	0	0	0	0	0	0	0	0	0	0	0	0	42.5612	40.2016	40.9488	40.0405	40.0419	24.1247	30.5534	28.0411	31.8911	27.5217	27.4065	13.6599	24.8816	24.0383	24.0195	19.4662	27.1136	25.3686	25.4225	24.6547	27.5187	29.7355	0.14934	92.6833	107.155	27.7718
3.64_450.5748m/z	450.575	3.64252	0	0	0	0	0	0	0	0	0	0	0	0	0	0	0	0	0	0	0	0	0	51.4691	60.0859	53.1584	53.119	52.7755	41.3988	49.2121	58.5354	44.2857	41.4312	37.8088	30.7364	37.067	36.1188	39.2154	32.7904	25.2226	40.7672	29.6141	36.3889	23.8093	193.188	18.8164	27.3605	54.9139	2.03909
0.90_905.9831m/z	905.983	0.897017	0	0	0	0	0	0	0	0	0	0	0	0	0	0	0	0	0	0	0	0	0	78.8559	63.4398	76.5235	71.6846	61.1593	56.1785	52.779	37.6613	27.8377	25.5162	29.7845	17.368	34.737	34.7339	37.5379	14.204	14.2912	27.7699	31.2311	15.8738	26.3027	81.8718	10.4299	34.5679	56.9563	12.6821
2.93_484.4789m/z	484.479	2.9264	0	0	0	0	0	0	0	0	0	0	0	0	0	0	0	0	0	0	0	0	0	57.9922	48.0177	45.5707	55.3179	59.9123	38.0633	45.0692	42.9858	49.2182	37.1537	39.6202	20.0808	24.1419	17.4961	24.2739	22.6823	24.615	23.5725	23.149	27.0906	18.7	131.077	16.9954	36.9791	71.3834	25.633
0.90_710.1311m/z	710.131	0.897017	0	0	0	0	0	0	0	0	0	0	0	0	0	0	0	0	0	0	0	0	0	43.3567	42.7126	38.6296	36.5576	37.2349	32.1644	34.2487	26.3618	27.7957	23.7628	28.2294	15.8806	19.9343	25.3531	19.0722	19.9106	15.3819	14.786	14.6862	17.7549	14.0132	95.7058	18.0196	38.0015	102.461	45.3827
1.18_505.0920m/z	505.092	1.1794	0	0	0	0	0	0	0	0	0	0	0	0	0	0	0	0	0	0	0	0	0	33.407	35.3458	35.5938	32.2917	30.7103	22.3317	25.401	20.0438	25.753	12.5813	18.4178	11.8639	3.86155	0.994852	5.35327	4.77581	4.12128	2.98769	4.87352	4.50067	4.50298	24.9875	7.65025	68.581	60.3402	14.5677
2.81_609.6024m/z	609.602	2.81493	0	0	0	0	0	0	0	0	0	0	0	0	0	0	0	0	0	0	0	0	0	65.8366	48.8805	70.5686	52.0447	62.1585	38.5444	44.3168	52.1807	34.1356	34.3787	27.596	27.7528	13.8154	15.3778	16.4348	13.6502	16.178	15.3694	13.9891	19.7619	20.0596	225.546	17.6492	23.0281	93.8267	25.5696
2.94_640.0949m/z	640.095	2.93722	0	0	0	0	0	0	0	0	0	0	0	0	0	0	0	0	0	0	0	0	0	48.9812	40.7366	44.9829	58.4421	38.2383	37.4959	42.0878	36.3587	44.442	35.8808	37.9059	24.1903	23.3227	17.6704	22.2279	28.6502	15.4777	20.9204	20.0509	19.9003	10.645	125.08	13.9649	28.7782	55.7787	31.0208
2.92_686.5733m/z	686.573	2.9156	0	0	0	0	0	0	0	0	0	0	0	0	0	0	0	0	0	0	0	0	0	50.8281	41.335	33.1522	50.6752	57.4154	42.5658	36.2788	43.6899	36.0874	38.3114	28.7982	23.7507	16.6366	27.6634	22.7351	17.9059	17.0509	18.7056	24.6905	20.4341	24.1655	126.372	7.78046	28.377	59.2503	15.6527
0.87_489.8585m/z	489.859	0.87	0	0	0	0	0	0	0	0	0	0	0	0	0	0	0	0	0	0	0	0	0	54.9082	52.6864	42.0028	47.7196	51.4909	33.7746	41.3655	40.8351	31.5347	31.7384	34.5341	18.299	16.4637	27.7485	18.8347	17.314	18.4518	16.3083	14.5746	16.0407	20.7574	34.4846	6.52537	53.7022	42.2609	65.7341
0.97_433.0214m/z	433.021	0.970667	0	0	0	0	0	0	0	0	0	0	0	0	0	0	0	0	0	0	0	0	0	36.9604	29.4001	32.6178	29.5955	31.2911	30.6798	20.8478	22.8267	16.3588	23.1181	22.5124	10.4127	17.564	10.8124	10.001	12.6319	10.2769	11.7284	5.85921	6.84646	8.7954	31.6286	7.11544	46.2093	34.1572	16.5736
1.36_408.0544m/z	408.054	1.35573	0	0	0	0	0	0	0	0	0	0	0	0	0	0	0	0	0	0	0	0	0	58.8502	61.3045	54.4598	57.2871	55.1753	43.774	41.2292	41.1197	41.354	31.5191	29.1558	22.9437	19.417	14.9182	16.3561	14.7295	11.6316	18.3435	17.1928	13.1194	18.999	102.656	18.1305	36.5508	68.6562	45.8393
0.90_784.9699m/z	784.97	0.897017	0	0	0	0	0	0	0	0	0	0	0	0	0	0	0	0	0	0	0	0	0	65.3429	52.1331	56.943	66.4143	59.0376	33.3008	38.5661	33.4866	30.003	29.9356	23.7405	15.8734	33.2057	23.7755	17.7555	15.4941	14.6359	26.3344	20.8968	17.9468	30.2729	63.5705	5.70756	28.8259	73.3906	13.1192
2.53_428.6937m/z	428.694	2.52513	0	0	0	0	0	0	0	0	0	0	0	0	0	0	0	0	0	0	0	0	0	50.1048	42.0904	50.5642	45.5813	45.3207	36.8933	37.3128	32.886	35.2057	24.5604	37.1258	22.4512	18.7222	19.7019	22.6378	16.7297	22.9477	22.1896	23.8864	23.7358	14.8748	162.973	1.5117	20.7953	64.7661	14.1218
1.07_491.0245m/z	491.025	1.07333	0	0	0	0	0	0	0	0	0	0	0	0	0	0	0	0	0	0	0	0	0	53.3724	48.7221	58.7886	59.0039	58.2611	41.0193	36.4604	25.1981	23.3267	25.6778	35.0437	21.8362	20.4036	21.44	19.5324	23.5795	15.9852	18.9476	23.7514	21.5018	19.4118	79.9058	28.166	39.7402	80.6364	43.4953
0.90_884.9269m/z	884.927	0.897017	0	0	0	0	0	0	0	0	0	0	0	0	0	0	0	0	0	0	0	0	0	45.2224	38.514	52.2471	59.5225	59.1004	45.4516	30.2889	28.9883	16.807	22.2096	13.7226	19.7604	37.2976	30.3011	15.5494	8.03364	23.2001	30.7341	30.5518	19.1563	21.4873	30.0282	4.90035	36.1394	80.1762	14.4617
0.90_1164.0846m/z	1164.08	0.897017	0	0	0	0	0	0	0	0	0	0	0	0	0	0	0	0	0	0	0	0	0	60.1637	53.5111	39.3597	51.6861	46.6699	62.2492	32.0168	29.4981	27.6833	15.6418	22.0787	23.8743	21.751	30.8576	21.7758	13.365	13.0536	18.7238	14.0637	9.48321	22.439	40.6437	13.2377	21.949	72.6811	13.297
3.51_465.6459m/z	465.646	3.50943	0	0	0	0	0	0	0	0	0	0	0	0	0	0	0	0	0	0	0	0	0	38.6949	46.7347	42.5094	43.3431	42.5158	25.5508	25.9735	34.632	34.9564	24.1153	26.5923	18.1677	20.1171	20.335	27.7279	19.2725	21.4879	20.3053	15.8564	22.426	15.3876	115.086	10.9785	15.1226	98.0043	23.5854
0.90_479.9369m/z	479.937	0.897017	0	0	0	0	0	0	0	0	0	0	0	0	0	0	0	0	0	0	0	0	0	47.137	43.3361	48.876	48.1761	42.3766	21.435	37.4616	30.776	29.8811	25.54	24.0102	14.7536	19.4242	20.5954	20.3271	15.7664	8.98795	14.301	16.4764	9.99347	14.3749	59.6193	8.56029	28.612	51.8195	34.6306
0.90_935.9847m/z	935.985	0.897017	0	0	0	0	0	0	0	0	0	0	0	0	0	0	0	0	0	0	0	0	0	42.9322	46.4529	40.6639	56.1887	54.6372	30.2274	31.9092	19.2006	18.7141	11.5708	11.543	19.4323	36.0153	14.7647	22.5371	11.9899	20.3195	27.1123	16.7326	11.493	23.7597	42.7565	5.51841	30.9543	56.4264	14.3325
0.90_968.8800m/z	968.88	0.897017	0	0	0	0	0	0	0	0	0	0	0	0	0	0	0	0	0	0	0	0	0	44.0976	50.878	36.4238	44.5959	40.8806	26.3558	45.2891	27.9599	32.5951	27.1404	25.7757	12.2249	23.3665	12.3932	20.2471	7.05334	15.3237	20.3566	18.657	12.8691	22.001	30.0626	4.46409	38.6244	58.9979	23.1286
1.11_386.0878m/z	386.088	1.10915	0	0	0	0	0	0	0	0	0	0	0	0	0	0	0	0	0	0	0	0	0	63.8155	48.153	44.9628	49.8681	56.3326	37.2901	33.2857	26.8386	30.5324	24.7636	35.2901	12.3742	9.90165	16.1591	15.8243	12.8694	18.1235	10.3932	15.6476	9.82839	12.7294	129.334	15.0052	41.2662	96.9537	26.6426
1.23_520.9772m/z	520.977	1.23345	0	0	0	0	0	0	0	0	0	0	0	0	0	0	0	0	0	0	0	0	0	41.6248	33.2926	40.7632	31.5477	41.5024	25.1351	22.2659	24.3645	24.9912	22.4543	19.8438	14.6791	15.6381	14.301	21.8721	11.8759	15.1004	15.0224	12.8918	18.0171	16.5513	36.2946	5.5801	6.03491	22.9116	7.43812
0.86_1023.1566m/z	1023.16	0.864583	0	0	0	0	0	0	0	0	0	0	0	0	0	0	0	0	0	0	0	0	0	33.7792	32.0713	32.7935	39.7347	30.2722	30.8407	19.2874	26.157	21.3096	19.0096	17.8577	14.2493	11.8641	16.5402	11.4592	16.4236	9.58791	16.7627	9.72332	12.4013	18.8594	35.7593	8.89477	37.4332	38.5728	23.3682
0.89_804.9180m/z	804.918	0.891617	0	0	0	0	0	0	0	0	0	0	0	0	0	0	0	0	0	0	0	0	0	41.0055	43.7246	41.5008	51.8329	43.4982	24.6123	33.4249	25.0893	21.5821	18.4767	17.7346	15.916	20.9441	23.0332	14.8337	11.7934	18.4511	15.3086	12.3674	14.042	13.1773	52.2569	1.44711	26.2192	38.8516	12.6255
1.51_513.1321m/z	513.132	1.50503	0	0	0	0	0	0	0	0	0	0	0	0	0	0	0	0	0	0	0	0	0	43.9619	36.709	46.4003	32.2038	47.8901	26.0738	33.1749	30.4656	32.1878	26.1113	24.3984	16.9507	10.2083	13.1469	18.1653	10.3494	10.2457	14.3859	13.4249	14.2996	14.096	215.907	9.19617	24.8795	64.6786	14.6397
0.78_161.5798m/z	161.58	0.783533	0	0	0	0	0	0	0	0	0	0	0	0	0	0	0	0	0	0	0	0	0	32.2934	30.0071	29.642	25.7149	28.939	30.2352	25.3045	24.7886	23.2276	25.0438	22.7894	21.124	11.946	17.3833	14.873	16.171	15.9986	16.8815	16.2074	14.9627	11.032	65.3579	10.5236	20.2513	57.0002	21.9908
0.90_966.0077m/z	966.008	0.897017	0	0	0	0	0	0	0	0	0	0	0	0	0	0	0	0	0	0	0	0	0	33.0014	32.0832	40.3382	28.3064	38.0932	34.8124	36.6232	28.3301	18.7894	21.1382	11.2992	18.0621	24.0394	19.576	17.0389	12.1821	12.9617	16.5402	16.455	11.6886	20.1323	49.7226	4.26587	17.6791	34.4706	16.6894
2.96_632.1136m/z	632.114	2.96423	0	0	0	0	0	0	0	0	0	0	0	0	0	0	0	0	0	0	0	0	0	45.7786	39.6653	35.5864	36.4581	40.3577	23.5197	34.4083	18.6548	32.5418	31.7762	28.1947	22.8323	10.2873	10.1948	1.5957	15.2738	9.21846	15.6817	12.7115	18.0809	7.6496	117.433	4.28864	24.2402	17.7587	10.2355
0.90_1053.9769m/z	1053.98	0.897017	0	0	0	0	0	0	0	0	0	0	0	0	0	0	0	0	0	0	0	0	0	50.129	54.027	37.2914	33.3635	34.5133	24.4478	17.8339	16.5734	12.9441	12.1596	10.951	14.3412	9.85769	30.4089	25.1953	16.4709	8.20623	14.8216	20.3157	12.8206	15.1433	56.9665	11.1888	12.3012	51.1276	21.6264
0.79_382.1824m/z	382.182	0.794333	0	0	0	0	0	0	0	0	0	0	0	0	0	0	0	0	0	0	0	0	0	26.2745	31.99	28.2849	28.2622	18.6643	22.4017	28.2182	25.592	25.7708	20.997	19.5697	13.669	6.90337	13.6505	15.139	13.4818	16.4399	11.0383	12.9385	13.0035	12.2537	25.6237	9.64423	12.6415	26.8935	9.81636
2.45_582.0181m/z	582.018	2.44608	0	0	0	0	0	0	0	0	0	0	0	0	0	0	0	0	0	0	0	0	0	31.2775	29.1362	27.239	37.2174	26.8942	18.6316	31.5078	23.1402	29.5191	19.1181	20.6519	7.84576	8.65252	15.9265	11.9903	7.20617	12.2733	12.2115	12.492	9.92857	15.2837	118.406	4.5192	9.58493	29.155	29.3884
0.90_832.9467m/z	832.947	0.897017	0	0	0	0	0	0	0	0	0	0	0	0	0	0	0	0	0	0	0	0	0	26.6343	28.7894	33.5417	35.221	39.6073	27.0193	32.3864	16.3533	14.4901	14.9931	17.9466	16.3724	19.988	18.0947	14.3077	11.1188	17.6133	19.2231	16.8974	13.4464	15.7414	43.1896	3.23922	15.258	20.4999	19.9453
2.41_533.0578m/z	533.058	2.41365	0	0	0	0	0	0	0	0	0	0	0	0	0	0	0	0	0	0	0	0	0	39.9651	32.1738	36.9857	39.3843	30.2788	15.0989	35.5461	28.0308	17.4644	18.439	31.0012	11.3303	16.26	14.4126	0	15.5254	17.6835	18.821	10.9833	8.54699	14.2773	90.4979	10.5093	1.86651	85.8787	9.35982
0.81_556.6357m/z	556.636	0.81055	0	0	0	0	0	0	0	0	0	0	0	0	0	0	0	0	0	0	0	0	0	32.5601	27.9212	25.7076	28.9927	32.105	23.7709	30.5112	26.414	27.632	27.7431	23.8447	11.6172	13.0141	12.3683	15.0179	16.0408	12.556	9.64386	12.2945	4.26523	8.57499	85.1737	9.77851	16.7995	34.7259	21.5466
2.78_488.4779m/z	488.478	2.7771	0	0	0	0	0	0	0	0	0	0	0	0	0	0	0	0	0	0	0	0	0	27.1318	29.0313	23.1408	26.0122	37.5362	19.4194	22.2536	27.3464	30.0155	19.3311	19.4966	17.7283	11.2104	8.79856	5.73045	10.3092	11.7868	5.32179	10.3872	9.9529	10.5489	75.4849	6.6862	21.9784	45.0418	18.2151
0.92_952.0360m/z	952.036	0.922017	0	0	0	0	0	0	0	0	0	0	0	0	0	0	0	0	0	0	0	0	0	20.297	39.876	29.1348	36.7755	45.1494	35.0156	22.9695	16.6053	10.4567	13.4321	10.0409	15.7248	17.048	8.86999	14.8813	4.03552	10.788	19.7582	18.98	7.07945	5.90674	27.9415	2.01657	21.3772	45.3688	2.89924
0.92_675.0643m/z	675.064	0.922017	0	0	0	0	0	0	0	0	0	0	0	0	0	0	0	0	0	0	0	0	0	36.3175	33.1334	25.7166	29.9704	26.3177	22.0736	9.3766	14.0914	15.4398	11.3871	12.7408	14.9402	12.6606	11.2412	20.4241	8.22037	16.5385	12.5323	17.7783	14.8324	17.5362	31.4303	5.89522	14.4964	20.6212	7.34961
0.89_823.1252m/z	823.125	0.891617	0	0	0	0	0	0	0	0	0	0	0	0	0	0	0	0	0	0	0	0	0	25.5755	30.6014	25.487	29.47	32.6203	17.5323	16.1309	16.0916	22.3259	11.7078	12.2294	16.4327	17.694	7.24837	13.4527	7.06965	12.7761	9.17928	11.0702	8.77413	18.7535	47.3844	5.91422	21.601	46.5685	5.14773
0.90_1193.8928m/z	1193.89	0.897017	0	0	0	0	0	0	0	0	0	0	0	0	0	0	0	0	0	0	0	0	0	16.6619	29.2776	40.5045	42.0436	31.3374	25.4347	22.1299	15.5207	8.8312	18.2955	8.6429	9.76016	22.5694	16.2335	6.50021	4.70158	11.5488	13.2499	11.5945	14.287	10.3092	27.2311	2.75005	16.1731	38.7027	7.54664
0.89_1115.5314m/z	1115.53	0.891617	0	0	0	0	0	0	0	0	0	0	0	0	0	0	0	0	0	0	0	0	0	28.1105	28.3776	11.4889	29.1925	34.4772	22.6452	27.4347	22.8351	13.9652	17.4283	12.6067	9.07188	18.5254	6.43524	9.16126	7.05841	8.14048	10.2899	4.93136	6.02153	8.06755	36.0276	0.00972613	17.2657	78.4056	10.4266
4.48_561.6240m/z	561.624	4.47563	0	0	0	0	0	0	0	0	0	0	0	0	0	0	0	0	0	0	0	0	0	25.4669	18.2635	20.6977	22.6254	22.7748	25.5627	19.2899	13.546	20.9622	14.2744	15.1026	16.1643	9.07774	14.0949	16.2265	20.8523	12.6833	13.0306	8.23658	12.3903	15.9877	60.533	7.98868	5.9197	15.2872	0.87714
0.89_1123.6817m/z	1123.68	0.891617	0	0	0	0	0	0	0	0	0	0	0	0	0	0	0	0	0	0	0	0	0	17.9815	24.5004	15.7836	30.3075	28.8694	15.1375	35.6053	29.8486	44.1997	21.2103	19.6828	8.41594	18.2298	11.7393	4.16527	5.51355	9.68379	8.37486	11.7438	6.46352	5.72176	39.4721	4.42765	26.3731	83.4072	4.61916
0.89_1148.8558m/z	1148.86	0.8862	0	0	0	0	0	0	0	0	0	0	0	0	0	0	0	0	0	0	0	0	0	27.4727	22.8696	21.6401	27.486	21.8572	20.9891	39.7108	29.1695	23.1621	17.0377	13.8382	15.9811	10.0792	14.1144	8.95718	1.56592	11.2201	10.375	13.7086	9.53611	8.96038	36.7664	1.71527	29.7491	22.7928	6.69863
0.92_539.0988m/z	539.099	0.922017	0	0	0	0	0	0	0	0	0	0	0	0	0	0	0	0	0	0	0	0	0	22.9943	27.1638	22.9697	26.6802	21.6364	18.4742	14.4457	15.0667	12.2517	15.8164	12.0265	10.4328	13.9506	14.3865	12.4197	7.2799	7.94631	7.43574	9.27145	14.4328	12.2515	46.5948	4.67617	17.3584	34.8031	11.6685
0.90_483.0196m/z	483.02	0.897017	0	0	0	0	0	0	0	0	0	0	0	0	0	0	0	0	0	0	0	0	0	27.2271	31.5733	28.3555	28.195	32.8166	24.2926	13.0726	16.7226	17.0975	15.663	13.8947	10.1371	12.2035	7.93206	15.6527	8.84756	10.242	8.82307	12.9945	7.16434	13.4653	45.617	6.32005	15.2915	36.8188	17.0104
0.82_467.6213m/z	467.621	0.81595	0	0	0	0	0	0	0	0	0	0	0	0	0	0	0	0	0	0	0	0	0	22.2511	26.8222	32.2774	23.1114	25.0414	28.4438	20.5654	15.805	22.5547	15.7798	23.0347	10.9968	9.94968	8.44455	12.2079	10.1814	9.30676	10.5926	5.21984	5.41127	11.6035	65.8968	5.64844	14.1732	45.8596	6.82848
3.08_543.5007m/z	543.501	3.07572	0	0	0	0	0	0	0	0	0	0	0	0	0	0	0	0	0	0	0	0	0	26.956	12.6867	23.4141	21.3459	29.4526	15.861	12.1958	14.6534	14.8773	14.6819	22.1299	9.49915	11.7872	9.79752	5.74848	8.6815	5.40453	9.12503	6.91328	14.9883	5.22153	70.8915	7.64404	14.6772	30.358	11.2494
3.00_675.6241m/z	675.624	2.99667	0	0	0	0	0	0	0	0	0	0	0	0	0	0	0	0	0	0	0	0	0	25.3008	25.158	20.9299	31.8735	26.7655	13.551	25.2828	15.2676	10.621	11.1247	10.8977	14.1849	4.83887	14.2124	14.3167	6.42272	8.08272	7.94642	14.9652	8.61871	8.94599	57.4543	5.95283	10.5052	29.524	10.8337
0.88_1146.1184m/z	1146.12	0.8808	0	0	0	0	0	0	0	0	0	0	0	0	0	0	0	0	0	0	0	0	0	20.592	18.8852	20.3666	32.1496	15.5897	5.0807	4.15728	18.3692	17.7438	12.3639	21.0672	13.995	7.82479	20.952	5.13593	9.33568	6.52389	7.29327	7.04815	3.3734	14.7444	13.4292	0	15.4339	23.0216	20.9119
0.89_1043.3173m/z	1043.32	0.8862	0	0	0	0	0	0	0	0	0	0	0	0	0	0	0	0	0	0	0	0	0	24.9554	14.3991	15.0187	12.8931	19.2586	18.7195	24.7248	19.0716	18.2612	6.80229	24.47	12.679	15.5633	6.48	10.6427	8.66288	5.71518	9.71256	17.2805	9.44633	9.25643	32.2957	3.74425	21.9514	25.0049	11.4044
0.79_487.6102m/z	487.61	0.794333	0	0	0	0	0	0	0	0	0	0	0	0	0	0	0	0	0	0	0	0	0	19.9446	7.33656	20.1411	16.6972	15.2688	17.4611	20.4182	10.2943	12.3312	10.816	8.54024	9.13414	6.88551	6.88346	6.18253	9.08382	7.929	7.20738	8.23239	7.34427	8.77557	47.9105	3.46221	13.5407	29.4057	7.90539
2.46_336.0715m/z	336.072	2.46228	0	0	0	0	0	0	0	0	0	0	0	0	0	0	0	0	0	0	0	0	0	17.3942	8.35263	18.2696	14.4259	17.549	8.14797	9.95714	9.19383	9.22618	9.74214	7.35922	6.17558	4.76069	6.30705	6.54761	7.85822	6.7962	6.55027	6.85351	5.61409	5.17963	22.9393	1.66481	23.7679	14.4614	14.4721
0.89_1049.1326m/z	1049.13	0.8862	0	0	0	0	0	0	0	0	0	0	0	0	0	0	0	0	0	0	0	0	0	15.7375	10.8771	11.9426	12.5746	21.1448	14.9026	18.8206	15.0523	17.2281	15.3403	19.8708	5.26895	2.726	6.06936	6.48352	3.68283	5.77362	4.03473	5.26807	2.01428	7.53415	35.1902	6.45063	20.2727	34.5201	6.02818
0.88_1076.0952m/z	1076.1	0.8808	0	0	0	0	0	0	0	0	0	0	0	0	0	0	0	0	0	0	0	0	0	11.659	15.5591	2.8001	7.75364	10.1683	9.58757	12.3074	19.2658	9.42533	8.86483	12.9469	4.96951	10.4584	16.1772	3.49879	2.74084	2.01554	3.55789	5.34193	9.20694	6.76657	17.4062	10.3369	13.1788	22.9028	15.7699
2.75_356.6727m/z	356.673	2.75008	0	0	0	0	0	0	0	0	0	0	0	0	0	0	0	0	0	0	0	0	0	18.0421	22.2304	15.4304	24.2198	16.5632	15.8317	14.5971	12.3413	16.305	12.0344	15.9673	6.52983	6.80905	9.4231	6.26102	4.98782	10.397	6.55853	5.91054	5.94925	5.14281	74.9593	4.27636	14.8926	30.6284	10.2097
0.85_553.0172m/z	553.017	0.848383	0	0	0	0	0	0	0	0	0	0	0	0	0	0	0	0	0	0	0	0	0	23.684	19.1685	22.7032	17.8125	23.9449	16.164	19.0685	14.2146	10.0923	11.4237	18.7202	8.70976	5.60249	6.14825	8.3421	4.52612	5.23069	1.48621	5.33068	1.72703	8.16798	27.1244	9.04753	26.2794	34.4014	33.8929
0.88_881.2795m/z	881.279	0.8808	0	0	0	0	0	0	0	0	0	0	0	0	0	0	0	0	0	0	0	0	0	14.9837	24.1281	17.9292	20.0488	20.3029	10.4766	18.6773	21.8385	20.6058	26.0012	19.7375	2.85945	10.5245	10.7392	7.73937	7.42586	9.22709	6.39777	6.12152	4.5959	5.06705	24.6301	2.94321	20.3781	18.4975	16.9969
0.90_617.9797m/z	617.98	0.897017	0	0	0	0	0	0	0	0	0	0	0	0	0	0	0	0	0	0	0	0	0	22.0597	21.2176	24.4421	36.8699	23.8098	15.1714	20.1513	15.0335	15.5399	11.7866	9.64639	6.84375	17.1652	11.3729	10.1294	3.34803	3.11367	5.75523	8.8088	3.59905	6.22382	29.6317	6.01445	13.3981	26.5816	11.1287
1.22_349.9935m/z	349.993	1.21723	0	0	0	0	0	0	0	0	0	0	0	0	0	0	0	0	0	0	0	0	0	22.506	22.0799	23.0783	24.1932	21.6027	17.3494	13.8895	18.552	13.7889	16.4704	12.1935	7.84849	5.46747	7.65682	9.16737	4.80173	5.88958	4.2853	5.03809	3.69121	5.11169	16.5601	18.6087	25.5506	24.1707	8.85281
0.95_572.1365m/z	572.136	0.95445	0	0	0	0	0	0	0	0	0	0	0	0	0	0	0	0	0	0	0	0	0	24.0677	21.7275	17.8992	16.4075	10.6119	22.7679	12.7935	18.1608	9.58267	10.665	15.7952	8.44312	6.60956	5.4575	6.87862	2.71017	3.77978	5.2623	4.60262	3.54603	2.64228	22.9882	6.61152	11.6257	21.3675	6.01619
0.90_734.0430m/z	734.043	0.897017	0	0	0	0	0	0	0	0	0	0	0	0	0	0	0	0	0	0	0	0	0	27.7907	21.7796	27.7481	27.2671	21.7924	23.4343	10.5469	11.6416	12.4256	7.16853	12.5473	7.31625	10.3429	13.4952	12.0738	0.124444	7.68953	7.46791	6.68045	7.01635	7.26285	18.6478	6.08502	9.75246	23.5185	0.00498932
0.90_1128.8846m/z	1128.88	0.897017	0	0	0	0	0	0	0	0	0	0	0	0	0	0	0	0	0	0	0	0	0	28.2423	22.9556	15.9843	24.0501	21.7288	11.3949	12.1241	14.5417	22.5532	8.52693	6.44446	9.74926	12.4759	18.9793	9.39538	5.08447	5.24035	10.8452	8.18923	2.92726	5.40409	22.3594	0.30415	16.9443	23.5494	4.85103
0.89_1131.8002m/z	1131.8	0.891617	0	0	0	0	0	0	0	0	0	0	0	0	0	0	0	0	0	0	0	0	0	21.4913	21.0732	16.8745	22.6639	20.0529	6.3149	15.0585	19.8879	29.8212	20.04	11.3804	3.09444	8.98831	2.66242	8.11153	3.61183	5.46134	8.42116	6.52677	10.7667	9.33291	28.4598	2.17299	7.46137	29.539	10.3493
0.92_319.1591m/z	319.159	0.922017	0	0	0	0	0	0	0	0	0	0	0	0	0	0	0	0	0	0	0	0	0	12.3016	12.607	18.691	10.4271	12.798	11.4956	8.11578	8.39308	8.59499	8.61498	8.56039	8.41587	3.06049	7.41283	7.22832	4.5401	5.46327	4.27735	5.76433	6.57607	7.26328	28.2483	13.6243	5.79818	12.6489	10.4
0.81_352.1356m/z	352.136	0.80515	0	0	0	0	0	0	0	0	0	0	0	0	0	0	0	0	0	0	0	0	0	22.1694	20.532	15.2335	12.6373	23.0189	17.7601	13.8238	15.8348	17.3992	11.4195	15.3005	11.4224	4.98493	6.61883	7.13977	9.70769	9.2054	5.99254	6.38277	7.69116	7.40432	58.182	1.82827	6.95634	25.1866	6.40741
0.84_626.9910m/z	626.991	0.842967	0	0	0	0	0	0	0	0	0	0	0	0	0	0	0	0	0	0	0	0	0	28.3285	17.7939	14.8123	26.0248	16.861	17.8773	16.5708	16.1974	15.5751	10.5026	9.16338	7.79507	7.53934	6.99795	5.66734	8.33324	5.55945	4.73471	9.23124	5.62381	5.72849	36.9315	6.44377	11.3	13.3691	3.72041
0.89_1157.0680m/z	1157.07	0.8862	0	0	0	0	0	0	0	0	0	0	0	0	0	0	0	0	0	0	0	0	0	15.455	13.6924	17.0331	16.3266	5.4843	11.538	13.6843	11.5428	8.19443	8.52408	7.83817	7.45352	7.09748	7.75598	3.3272	4.64865	2.86381	6.40448	2.25983	3.1622	6.49735	37.6761	7.07641	13.0718	17.0964	2.62934
0.81_255.5969m/z	255.597	0.81055	0	0	0	0	0	0	0	0	0	0	0	0	0	0	0	0	0	0	0	0	0	14.3585	19.21	17.5831	19.5226	13.1916	16.0171	18.8037	10.4795	18.8847	11.4204	16.3252	7.96516	7.27698	5.71792	6.44181	7.8167	5.44483	6.75528	7.37399	6.35606	7.16521	60.365	2.08137	7.74119	30.3788	7.11285
0.90_953.4762m/z	953.476	0.897017	0	0	0	0	0	0	0	0	0	0	0	0	0	0	0	0	0	0	0	0	0	17.1184	24.1825	25.8862	19.0912	22.6995	8.60052	16.5826	9.92431	9.84237	8.01204	7.68572	9.0909	15.4404	6.43048	8.14531	4.43757	2.56428	5.11957	8.40249	1.5297	11.6188	15.9682	0.855786	12.2376	23.3326	9.60386
0.81_596.6189m/z	596.619	0.81055	0	0	0	0	0	0	0	0	0	0	0	0	0	0	0	0	0	0	0	0	0	16.7447	16.366	19.8923	15.3362	16.7584	16.4143	17.7877	13.0708	17.0448	12.1673	18.4667	6.05116	6.23856	4.8633	8.57562	6.88592	5.82714	5.42988	3.67058	7.49578	4.95948	33.2084	3.31008	7.74608	17.9845	4.31953
1.75_449.7218m/z	449.722	1.7462	0	0	0	0	0	0	0	0	0	0	0	0	0	0	0	0	0	0	0	0	0	21.1063	17.1367	13.8427	18.2026	11.8695	9.08111	14.7794	15.8694	17.9502	9.164	7.53503	5.82809	5.40407	6.06604	7.47794	6.83481	6.5338	5.53375	6.08455	4.34868	6.94408	63.8468	5.14017	10.0472	28.8833	9.11162
0.89_1076.5658m/z	1076.57	0.891617	0	0	0	0	0	0	0	0	0	0	0	0	0	0	0	0	0	0	0	0	0	15.6733	11.1954	19.6598	17.011	15.6255	6.97116	20.1166	10.9228	4.97886	11.9641	13.6122	8.79089	9.76574	12.9805	1.98499	0.696411	5.02377	12.2384	6.25025	3.89983	6.63344	16.9891	1.86863	13.929	21.0392	0.0254484
1.70_423.6866m/z	423.687	1.69757	0	0	0	0	0	0	0	0	0	0	0	0	0	0	0	0	0	0	0	0	0	12.7179	14.9725	9.5819	10.639	16.5266	16.6796	14.4039	9.05257	10.6772	10.4098	8.82749	5.79932	3.18502	5.42682	2.19968	2.92766	6.00258	3.30548	4.97395	7.2924	9.42463	29.1165	2.15411	3.41916	33.758	8.3554
1.11_327.6825m/z	327.683	1.10915	0	0	0	0	0	0	0	0	0	0	0	0	0	0	0	0	0	0	0	0	0	20.497	13.339	16.0957	12.4724	13.7186	9.57688	15.366	10.1184	5.80084	8.68823	8.79293	3.57935	5.88396	6.18827	9.4357	4.81947	7.15538	3.48609	5.28103	6.45387	6.60748	46.9012	1.55585	9.24894	26.6567	6.73486
0.78_489.7216m/z	489.722	0.778117	0	0	0	0	0	0	0	0	0	0	0	0	0	0	0	0	0	0	0	0	0	16.5775	9.81559	13.0722	15.1395	5.97069	13.4716	11.9165	10.3024	7.69261	7.90949	9.83377	4.52067	3.26471	5.71445	9.69374	6.30736	5.85154	0.957733	5.99419	1.80942	4.50554	47.5201	3.37222	9.74026	32.8218	16.9733
0.80_447.6297m/z	447.63	0.799733	0	0	0	0	0	0	0	0	0	0	0	0	0	0	0	0	0	0	0	0	0	13.3212	8.97697	10.9276	7.03516	7.661	5.59086	6.09883	7.66808	13.5075	8.84182	8.45557	6.59389	3.51694	3.03456	4.4095	5.84355	5.50933	6.3848	5.02738	5.37157	4.88084	29.4763	2.34869	3.43766	16.3413	9.77048
0.81_325.5908m/z	325.591	0.80515	0	0	0	0	0	0	0	0	0	0	0	0	0	0	0	0	0	0	0	0	0	11.9512	10.8753	11.1367	11.6064	10.7198	14.3648	12.222	12.4449	12.6774	10.901	11.59	5.25745	6.30148	3.36429	4.36394	4.09026	5.43145	4.87948	3.83007	6.38544	7.77028	33.1398	2.57587	6.4122	26.8231	5.69276
1.02_248.6168m/z	248.617	1.0247	0	0	0	0	0	0	0	0	0	0	0	0	0	0	0	0	0	0	0	0	0	14.7667	13.177	17.1619	15.2007	16.7236	9.53387	12.7064	11.4174	12.9087	7.51897	6.66301	6.66453	4.43278	3.46637	5.99538	2.41901	2.52604	4.44551	3.77674	3.96973	3.70161	45.6291	3.02384	16.553	38.1229	8.75432
0.92_339.0107m/z	339.011	0.922017	0	0	0	0	0	0	0	0	0	0	0	0	0	0	0	0	0	0	0	0	0	17.1709	13.4034	14.3658	12.9501	13.5836	8.2209	11.0446	8.98151	6.96322	4.39174	7.83868	7.38479	4.55713	8.40906	9.83991	4.34008	4.02268	3.79239	3.69286	3.34823	7.21472	14.5693	7.80739	11.7952	20.8993	5.76655
0.80_571.1291m/z	571.129	0.799733	0	0	0	0	0	0	0	0	0	0	0	0	0	0	0	0	0	0	0	0	0	12.4601	11.6828	11.8271	7.14588	14.3001	16.4778	11.1989	8.80041	9.17305	7.42571	4.46079	6.92628	4.04789	5.68877	7.30281	6.52347	4.13403	1.50816	1.17441	4.76987	3.76231	29.542	4.37393	7.3364	19.0174	7.1865
1.10_272.0390m/z	272.039	1.10375	0	0	0	0	0	0	0	0	0	0	0	0	0	0	0	0	0	0	0	0	0	11.8998	6.8524	13.4658	13.3791	12.0678	9.23821	6.60885	6.49307	9.15763	5.02866	8.53988	2.83222	2.47297	4.85587	2.02508	1.49813	2.5437	4.74336	4.72673	5.2218	2.65791	11.1894	7.62721	5.6701	13.5113	10.5765
3.15_412.4854m/z	412.485	3.15137	0	0	0	0	0	0	0	0	0	0	0	0	0	0	0	0	0	0	0	0	0	16.5342	8.18933	9.20573	12.5985	10.9554	10.007	8.44937	4.06502	9.37519	8.57524	7.1061	3.73368	6.78134	7.15501	6.44231	4.36904	2.8209	8.93634	4.79395	1.82388	6.16714	35.3041	4.01526	8.3858	23.9374	10.1371
5.46_499.1356m/z	499.136	5.45993	0	0	0	0	0	0	0	0	0	0	0	0	0	0	0	0	0	0	0	0	0	4.31398	5.70506	2.09458	8.06131	8.63271	9.75486	10.851	5.03382	5.23589	4.2271	5.5848	6.24058	4.35593	11.8785	5.7922	4.99987	6.70957	8.00828	5.86313	8.28892	5.67163	4.7481	0.927628	7.45525	3.27351	12.5034
0.89_1064.3024m/z	1064.3	0.8862	0	0	0	0	0	0	0	0	0	0	0	0	0	0	0	0	0	0	0	0	0	12.6885	14.0219	5.56145	13.1842	13.7789	6.98091	16.0479	9.2887	12.8944	10.6291	9.8302	0.574706	3.83811	3.98109	3.62547	2.41505	3.2179	4.72622	0.478252	0.0942441	3.36898	9.00014	3.92573	9.27302	8.75761	4.06845
0.79_341.6516m/z	341.652	0.788933	0	0	0	0	0	0	0	0	0	0	0	0	0	0	0	0	0	0	0	0	0	6.77904	6.23678	7.78227	8.63783	6.12942	9.73514	10.5263	6.46563	9.04548	5.51662	5.82143	4.51137	1.47833	1.54657	4.13704	5.04688	2.83823	3.89746	2.38617	2.7161	7.42754	32.9717	1.24771	6.7215	15.5515	5.11212
6.04_589.2350m/z	589.235	6.04093	0	0	0	0	0	0	0	0	0	0	0	0	0	0	0	0	0	0	0	0	0	4.72014	8.10847	3.54363	6.37203	4.15476	4.29773	7.21558	6.89523	8.32943	9.54508	2.24996	7.30044	4.14625	4.04997	3.08303	1.17768	2.58794	2.83409	4.91475	2.63449	4.7357	3.97529	0.92926	4.18434	4.98896	4.23426
1.40_180.5158m/z	180.516	1.40437	0	0	0	0	0	0	0	0	0	0	0	0	0	0	0	0	0	0	0	0	0	11.46	11.0617	10.3239	11.4361	6.79727	6.8329	5.99839	5.00365	6.06944	2.51942	5.21182	2.51865	2.99427	4.19159	0.866225	3.18536	1.583	2.09608	2.37176	2.21768	3.96682	12.8601	6.21361	4.6652	15.3255	3.19473
0.88_238.9744m/z	238.974	0.8808	0	0	0	0	0	0	0	0	0	0	0	0	0	0	0	0	0	0	0	0	0	2.88192	4.91199	3.2502	3.73522	2.3996	2.53849	1.56791	2.08219	5.08452	3.02184	2.68778	1.24103	1.79481	4.32124	1.50359	2.46529	2.6933	3.69548	2.39473	1.77995	3.67886	3.44634	2.47394	5.01163	0.932803	2.36597
0.81_307.1510m/z	307.151	0.81055	0	0	0	0	0	0	0	0	0	0	0	0	0	0	0	8.03554e-06	0	0	0	0	0	113.199	113.064	120.577	125.678	115.143	117.435	121.708	111.639	107.924	95.5501	105.861	91.4194	59.6376	58.0723	61.546	60.7574	60.838	64.6444	50.3589	52.7604	51.4992	265.106	70.4389	88.6302	195.355	131.301
0.95_474.1863m/z	474.186	0.95445	0	0	0	0.000449711	0	0	0	0	0	0	0	0	0	0	0	0	0	0	0	0	0	150.223	115.297	124.335	126.427	122.275	135.256	131.798	127.206	120.422	117.096	110.279	82.1817	38.2888	61.4609	80.345	72.2002	70.1769	66.6299	56.0531	58.9663	77.0994	119.999	207.325	33.6388	94.4402	36.4926
0.84_703.1111m/z	703.111	0.837567	0	0	0	0	0	0	0	0	0	0	0	0	0	0	0	0.00030312	0	0	0	0	0	31.7354	31.0529	31.8214	34.7833	47.2669	23.0946	22.1504	18.5624	25.1092	20.3983	24.984	8.98086	10.4095	11.756	6.88311	5.70032	6.24705	9.83465	6.47387	8.125	10.9297	103.657	28.935	27.2207	82.3828	72.3833
2.52_602.1938m/z	602.194	2.51972	0	0	0	0	0	0	0	0	0	0	0.000247848	0	0	0	0	0	0	0	0	0	0	13.1828	8.18834	7.13685	8.54578	11.8377	9.63788	9.15344	9.3859	8.30338	5.63319	7.29516	13.8387	6.57269	6.76135	6.01469	9.28009	7.44551	3.58414	7.12787	7.09168	7.58886	20.8383	0.474696	8.81936	8.88241	15.9515
1.21_436.9850m/z	436.985	1.21183	0	0	0	0	0	0	0	0	0	0	0	0	0	0.000342077	0	0	0	0	0	0	0	25.0273	23.5076	23.0532	19.2491	23.5424	16.4358	13.5706	14.6908	13.1976	11.7189	11.9889	2.65813	5.20514	8.34588	7.82471	4.97564	5.67212	5.9386	1.65225	7.48941	7.9897	38.4882	2.6121	7.52843	23.9313	1.08699
2.52_505.4823m/z	505.482	2.51972	0	0	0	0	0	0	0	0.00060813	0	0	0	0	0	0	0	0	0	0	0	0	0	25.8934	25.7451	23.9319	26.888	16.3506	12.2621	20.902	17.9227	14.0309	20.8568	22.292	13.1731	9.44273	12.1479	7.72445	8.71179	7.24165	5.61046	11.5206	7.06522	10.1799	90.0111	6.05473	10.2725	57.8342	13.9883
1.22_442.9779m/z	442.978	1.21723	0	0.000739156	0	0	0	0	0	0	0	0	0	0	0	0	0	0	0	0	0	0	0	31.4512	34.2111	35.8174	28.5507	32.6766	15.5881	25.9501	15.3246	19.9415	15.1188	17.6256	10.7507	6.5771	13.518	6.03303	9.66155	4.35031	8.55862	10.502	13.6778	6.42877	67.2686	4.19315	5.73547	35.6863	10.0996
0.92_295.0082m/z	295.008	0.922017	0.00120976	0	0	0	0	0	0	0	0	0	0	0	0	0	0	0	0	0	0	0	0	33.1257	29.8642	30.7198	30.8032	32.2464	25.4194	20.2485	22.1407	17.6515	15.7336	16.5589	13.6368	11.2904	15.372	13.8409	15.3283	11.0788	10.1285	11.7724	13.1076	8.27565	34.5747	15.028	19.1097	37.2041	21.1706
1.29_469.1061m/z	469.106	1.28548	0	0	0	0	0	0.00872429	0	0	0	0	0	0	0	0	0	0	0	0	0	0	0	252.168	235.742	233.386	224.393	232.915	179.683	179.284	172.93	172.497	150.318	150.276	129.443	100.527	121.263	123.422	108.028	118.152	113.487	124.751	106.152	119.372	564.133	119.908	115.812	445.957	115.378
1.05_400.1330m/z	400.133	1.05172	0.00050717	0	0	0	0	0	0	0	0	0	0	0	0	0	0	0	0	0	0	0	0	13.2825	10.7129	8.75882	6.93386	6.22281	7.43678	7.60797	4.16037	5.44552	5.44371	8.29634	4.88827	2.16649	2.67173	2.43411	2.45682	2.46223	3.96339	3.80723	2.54506	2.56341	18.7036	0.791237	5.13759	19.7815	9.28206
0.89_982.2603m/z	982.26	0.8862	0	0	0	0	0	0	0	0	0.00199514	0	0	0	0	0	0	0	0	0	0	0	0	18.5413	17.2747	10.4603	31.2284	18.6745	12.589	22.938	23.3112	25.9666	21.0162	19.1939	3.46102	10.9058	8.25403	5.22459	3.61522	4.77282	11.8839	9.08729	6.47816	7.01189	24.086	4.20676	14.4402	23.1621	9.36224
0.87_465.0401m/z	465.04	0.87	0	0.00989317	0	0	0	0	0	0	0	0	0	0	0	0	0	0	0	0	0	0	0	59.4915	43.5252	50.6359	47.979	42.1871	35.3796	36.7557	40.0992	36.508	34.5731	32.6733	20.2863	21.2314	22.7874	26.5503	15.2777	20.8934	23.1137	20.1399	19.272	24.2102	61.2311	30.8642	56.5897	56.2496	16.747
0.85_357.2496m/z	357.25	0.853783	0	0	0	0	0	0	0	0	0	0	0	0	0	0	0	0.0136495	0	0	0	0	0	58.472	53.7647	58.4568	52.6473	66.698	50.8683	45.7684	53.1624	52.0236	43.9276	49.4485	34.8769	31.5239	28.7698	30.0927	20.9005	28.5866	28.7597	28.0163	19.7331	27.9271	147.824	31.4301	35.7259	72.6957	39.6884
2.41_580.9314m/z	580.931	2.40825	0	0	0	0	0	0	0	0	0.0214637	0	0	0	0	0	0	0	0	0	0	0	0	75.2638	78.6737	85.6798	83.4285	79.6018	78.6056	65.4331	71.046	76.7921	55.7938	62.4726	40.3315	22.0774	34.1567	42.9058	32.2465	32.7929	30.8641	33.8069	26.7277	24.9065	257.805	21.5397	15.548	114.927	57.6023
1.86_330.0603m/z	330.06	1.85767	0	0	0	0	0	0	0	0	0.0763166	0	0	0	0	0	0	0	0	0	0	0	0	207.694	210.216	216.65	205.5	194.081	190.448	192.955	186.723	188.306	164.804	163.094	135.73	82.816	97.5323	105.12	102.858	98.1577	90.0202	103.229	96.8155	101.112	483.663	97.8815	107.354	408.336	153.528
2.74_604.0753m/z	604.075	2.73927	0	0	0.0833224	0	0	0	0	0	0	0	0	0	0	0	0	0	0	0	0	0	0	247.522	297.261	227.591	268.514	281.489	244.051	219.551	193.834	224.127	212.918	199.763	162.771	131.689	135.28	129.796	134.693	113.161	139.029	131.59	171.405	144.269	909.653	84.7922	147.896	356.133	157.966
0.78_399.7793m/z	399.779	0.783533	0	0	0	0	0.00232717	0	0	0	0	0	0	0	0	0	0	0	0	0	0	0	0	4.67841	5.19437	3.37207	9.96264	8.54682	2.5706	6.56131	5.19968	9.06044	4.35964	5.26326	3.39638	0.362518	3.08717	1.79111	1.46201	1.52466	0.32312	0.943878	2.49621	2.51573	3.70068	1.61686	2.38125	15.755	1.33779
0.90_1087.8870m/z	1087.89	0.897017	0	0	0	0	0	0	0	0	0	0	0	0	0	0	0.00891132	0	0	0	0	0	0	33.4758	28.3908	24.5858	32.9889	25.3495	24.2002	22.4	12.1388	17.81	8.4803	9.28622	21.0277	7.35666	10.3417	8.14514	7.16563	9.7648	10.5311	9.60105	6.89915	13.1221	26.2434	1.6826	15.5054	30.7853	13.2665
0.86_510.7858m/z	510.786	0.859183	0	0	0	0	0.035641	0	0	0	0	0	0	0	0	0	0	0	0	0	0	0	0	54.1105	56.5785	56.6758	57.4928	55.5844	33.9535	36.1958	38.689	28.8455	35.5439	40.0778	16.7219	17.2219	20.8921	17.0752	12.1538	12.0276	16.744	16.9434	15.959	16.4836	29.8344	9.89083	193.977	101.646	114.221
2.26_367.1501m/z	367.15	2.25895	0.510681	0	0.21887	0.407464	0.329919	0	0	0.331497	0.607239	0	0	0	0	0	0	0	0.439282	0	0	0	0	6659.87	6556.96	6580.03	6439.51	6535.3	5120.5	5277.99	5013.3	4967.28	4439.32	4395.09	3373.12	2974.62	2931.55	2941.32	2676.72	2787.49	2864.24	3036.69	2783.51	2865.39	13604.1	2473.62	4710.33	10418.6	4749.05
0.85_1025.7573m/z	1025.76	0.848383	0	0.0146545	0	0	0	0	0	0	0	0	0	0	0	0	0	0	0	0	0	0	0	33.1964	53.2896	46.3838	25.184	33.0687	18.5584	34.043	14.7728	27.7745	12.1119	19.3483	1.99221	11.3819	12.9854	22.1315	17.2277	29.0583	18.5301	15.5963	27.0292	15.2724	54.5191	4.04706	56.3402	42.8829	15.7833
0.87_212.8456m/z	212.846	0.87	0	0	0.148865	0	0	0	0	0	0.00826594	0	0	0	0	0.00884525	0	0	0	0	0	0	0	405.828	408.279	396.088	388.01	386.939	267.909	338.876	247.68	276.779	245.055	236.527	145.626	181.132	184.726	182.467	152.271	174.446	194.74	183.265	166.687	187.409	719.822	80.0435	114.41	681.475	476.366
0.82_487.2133m/z	487.213	0.82135	0.472534	0	0	0	0.125523	0	0	0.178558	0	0	0	0	0	0	0	0	0.219339	0	0	0	0	1580.84	1560.97	1604.14	1567.38	1575.51	1516.36	1443.62	1353.36	1334.67	1223.59	1208.45	1012.56	827.652	793.368	813.423	777.255	793.098	801.088	753.483	733.914	753.747	3826.08	1049.83	1164.17	2605.06	1722.79
1.51_245.1612m/z	245.161	1.51043	0.0795627	0	0	0	0	0	0	0	0	0	0	0	0	0	0	0	0	0	0.191612	0	0	477.753	475.355	477.254	474.945	487.787	447.644	455.943	428.463	449.63	378.874	395.077	306.302	256.093	243.588	256.634	253.658	250.766	252.348	273.532	246.322	245.309	976.037	290.424	125.794	1578.74	174.713
0.89_381.0796m/z	381.08	0.8862	0.0288534	0.649756	0.712605	0.26442	0	0	0.415657	0	0.415478	0.470535	0.569321	0	0	0	0	0.587496	0	0.0731506	0	0	0	7293.41	7177.07	7189.68	7092.7	7171.81	5021.06	5589.3	4923.98	4800.37	4321.97	4333.64	3642.83	4435.32	4336.06	4153.53	3596.92	3794.88	4292.43	4128.91	3827.19	4295.72	4751.09	4250.49	7068.45	3979.84	1800.5
1.18_399.0085m/z	399.008	1.18482	0.00456955	0	0	0	0	0	0	0	0	0	0.0198406	0	0	0	0	0	0	0	0	0	0	32.3701	41.478	33.53	29.2704	40.4332	30.2011	25.288	23.291	21.9944	23.576	19.5601	11.3292	10.8573	11.9474	10.5474	8.50372	11.4857	6.79951	10.3503	6.6115	8.23732	18.7041	29.3728	56.6494	35.975	32.6017
4.36_246.1703m/z	246.17	4.35875	0.0132579	0	0	0	0	0	0	0	0	0	0	0	0	0	0	0	0	0	0	0	0	21.2004	24.0046	18.5648	24.3066	24.2195	18.0505	16.9453	18.4693	18.378	16.2155	17.4344	11.5873	15.2383	12.1842	14.9938	18.0559	15.4485	10.2079	11.0248	16.3077	10.0946	50.8298	4.06571	13.3004	17.897	27.4632
2.71_589.6682m/z	589.668	2.71225	0	0	0	0	0	0	0.217704	0	0	0	0	0	0	0	0	0	0	0	0	0	0	355.555	364.637	326.086	331.738	333.723	310.585	290.583	298.493	287.096	267.68	278.978	197.567	176.343	189.717	179.834	167.713	156.041	152.325	187.807	192.122	157.783	978.271	118.442	195.522	518.584	242.624
4.01_318.1914m/z	318.191	4.00608	0.452209	0.582535	0	0.149495	0	0.226056	0	0	0	0	0.136948	0.464801	0	0.553604	0.0854057	0	0.397644	0.0200983	0	0	0.350906	5616.5	5714.57	5587.25	5655.06	5532.29	4989.11	5026.27	4677.23	4837.21	4254.1	4287.46	4030.69	4117.72	3509.24	3366.39	3244.51	3090.52	3214.65	3306.09	3516.8	3137.04	9324	1922.71	3167.23	10271.1	5562.46
0.85_469.0576m/z	469.058	0.848383	0	0.0115651	0	0	0	0	0	0	0	0	0	0	0	0	0	0	0	0	0	0	0	30.6149	28.9511	28.915	22.005	21.847	15.6567	20.2592	15.2797	13.6353	13.5071	16.5968	10.6	5.21827	11.5117	6.2178	5.00818	2.37478	7.04844	3.25912	3.99698	4.58886	43.7059	7.82248	21.1651	43.7858	27.6783
0.86_206.8866m/z	206.887	0.859183	0	0	0	0.130761	0	0	0	0	0	0.0653153	0	0	0	0	0	0	0	0	0	0	0	193.113	168.065	162.169	162.511	165.929	108.466	120.168	123.469	111.619	116.219	114.497	69.4317	55.4732	60.1875	53.0979	41.8605	53.4739	56.4487	52.2017	52.4825	58.5219	86.1128	27.0567	449.58	327.225	544.649
0.82_588.6321m/z	588.632	0.82135	0	0	0.00889222	0	0	0	0	0	0	0	0	0	0	0	0	0	0	0	0	0	0	14.4314	12.94	12.5781	13.9038	15.5137	12.5603	8.8923	11.172	11.1258	12.1312	10.9193	8.60538	2.77222	2.52493	11.0265	4.19112	4.28704	6.01927	5.29083	6.43947	4.54097	39.5166	2.67694	8.59873	20.0891	7.11496
2.42_599.6041m/z	599.604	2.42447	0	0	0	0	0	0	0	0	0	0	0	0	0	0	0	0.0571839	0	0	0	0	0	101.86	77.5545	87.3956	92.8795	92.4475	77.4173	74.1376	75.5868	72.6818	58.1543	72.0624	53.3108	37.7368	34.6772	32.2027	30.6596	36.0724	46.3377	37.2724	42.5659	36.3051	264.207	28.1602	23.0718	101.447	68.9034
0.89_332.8023m/z	332.802	0.8862	0	0.0470911	0	0	0	0	0	0	0	0	0	0	0	0	0	0	0	0	0	0	0	77.0694	74.6775	73.2703	70.2757	77.2648	55.2566	57.1535	36.6578	44.0738	44.1945	38.2443	33.548	27.0771	32.1562	28.0355	17.1343	23.9892	34.0991	26.0126	29.8497	37.374	86.7961	8.74821	26.6255	61.7343	14.4655
5.47_481.4007m/z	481.401	5.47073	39.9879	10.825	23.3854	10.9044	13.1775	9.61228	11.9089	10.6669	16.5677	9.24065	15.6111	11.6133	7.36148	0.855258	11.022	17.0035	10.773	16.7782	19.2027	13.7442	15.3654	0.216148	0.0500179	0	0	0	0	1.16556	0.875439	1.61526	0.791183	0	0	0	0.00154928	0.000846757	0.332638	0	0.00454184	1.81323	0	0.334596	0.00333322	4.69485	1.65483	0.0405521	0
0.94_418.1578m/z	418.158	0.938233	0	0	0	0	0	0	0	0	0.16447	0	0	0	0	0	0	0	0	0	0	0	0	131.756	116.268	130.206	106.074	116.314	115.685	101.125	100.818	96.5505	90.5268	90.3893	66.967	47.3256	52.395	59.08	56.2327	53.7052	57.1102	48.6579	41.2496	52.8497	147.536	197.704	65.4644	106.413	63.8348
0.86_122.9252m/z	122.925	0.859183	0	0.0559293	0	0	0	0	0	0.0754356	0.0452234	0.00702084	0	0	0	0	0	8.31895e-06	0.066704	0	0.081601	0	0	336.887	304.909	309.612	303.549	291.802	226.174	235.398	225.525	227.416	204.636	212.877	133.553	110.819	124.373	114.446	90.5032	90.7652	114.109	105.085	99.5763	119.286	143.123	48.7871	678.668	410.991	371.284
2.80_579.6014m/z	579.601	2.79872	0	0	0	0	0	0	0	0	0	0	0	0	0	0.0367774	0	0	0	0	0	0	0	44.0333	61.1165	49.1028	50.0336	49.7273	33.5139	45.2174	42.2453	45.696	33.1114	36.5836	24.581	18.5714	27.8007	19.9468	33.5989	22.2247	27.028	24.454	24.1499	17.4415	165.655	22.5706	21.3792	74.6736	24.874
1.27_420.1976m/z	420.198	1.27467	0.00625697	0	0	0	0	0	0	0	0	0.0916878	0	0	0	0	0	0.0886154	0	0	0	0	0	234.294	217.634	237.826	216.517	222.554	169.96	167.859	167.176	168.178	149.829	138.264	106.868	97.0236	113.807	113.813	97.9644	103.436	107.848	108.276	104.29	104.537	587.009	83.2837	148.697	347.028	157.668
6.06_283.6151m/z	283.615	6.06253	0	0	0	0	0	0	0	0	0.00601867	0.0301654	0	0	0	0	0	0	0	0	0	0	0	34.3941	31.9697	27.6252	37.3761	35.2954	16.9822	23.1539	24.6282	26.2799	21.2996	21.9499	25.3474	18.8908	29.6364	27.354	25.6309	26.7377	28.2214	21.8226	23.926	29.8924	42.4687	16.8187	14.0959	36.0141	31.1487
0.85_188.1763m/z	188.176	0.848383	0	0.275225	0	0	0	0	0	0	0.000879848	0	0	0.20089	0	0	0	0	0	0	0	0.00273216	0	490.084	476.007	489.691	475.615	469.075	377.136	421.686	396.594	390.093	347.319	345.571	258.673	260.145	231.718	229.727	209.66	214.67	234.578	226.796	211.13	229.154	1112.77	212.345	514.859	566.515	299.442
3.68_648.1040m/z	648.104	3.68035	0	0.0212138	0	0	0	0	0	0	0	0	0	0	0	0	0	0	0	0	0	0	0	14.1004	18.4814	25.7312	32.995	14.687	22.0902	18.5992	18.2726	20.4791	10.0093	10.5791	10.9478	15.0493	17.208	15.8799	9.66027	2.82398	5.66065	4.24899	16.2219	4.86642	66.2463	13.3065	3.92351	34.2284	12.4299
0.92_439.0372m/z	439.037	0.922017	0	0	0	0	0	0	0	0	0	0	0	0	0	0	0	0	0	0	0	0	0.114441	159.417	154.944	167.727	166.841	153.045	102.344	92.5606	86.682	77.9666	70.72	84.7928	79.0569	87.0117	83.8393	85.5016	78.0292	74.5451	94.373	90.3878	77.0329	93.816	95.7644	11.0904	229.758	126.36	38.195
3.87_627.6502m/z	627.65	3.86748	0	0	0	0	0	0	0	0	0.0311158	0	0	0	0	0	0	0	0	0	0	0	0	36.0081	30.791	36.6439	22.1769	16.9471	31.2059	17.7791	20.5531	22.3723	32.2627	16.0658	16.0438	14.7434	18.2752	6.69592	18.3779	9.2778	16.5647	17.073	13.0086	23.1858	54.507	1.41354	16.0688	36.5518	15.2993
1.02_316.1451m/z	316.145	1.0247	0	0	0	0	0	0	0	0	0	0	0	0	0	0	0	0	0	0	0	0.0176748	0	31.0175	28.9785	36.1228	35.642	29.5706	25.5811	22.7898	20.2557	16.2764	14.9512	19.0525	13.4758	9.82134	12.1863	7.15729	9.47557	10.3665	13.5254	6.67661	9.48915	9.83226	51.8113	5.71402	23.0945	47.2312	17.9238
4.39_350.1171m/z	350.117	4.39118	0.455205	0	0.417114	0.404526	0.234092	0.468645	0	0	0.348451	0	0	0	0	0	0	0	0.84131	0	0	0	0	2863.09	2847.81	2795.77	2833.95	2801.59	2194.17	2159.49	2052.42	2125.14	1849.15	1855.98	1748.79	2040.05	1857.55	1756.77	1636.78	1548.95	1621.14	1598.3	1751.34	1538.66	295.468	72.0839	50.4676	121.479	2439.55
3.84_463.2280m/z	463.228	3.83505	0	0.21612	0.212208	0	0	0	0	0	0	0	0	0	0	0	0	0	0	0	0	0	0	387.866	399.451	390.587	394.523	403.02	355.441	339.22	322.903	316.615	300.273	288.384	253.21	280.843	269.453	246.115	224.974	230.948	224.82	244.703	256.939	246.059	1171.77	116.212	232.748	734.934	243.794
0.86_38.9635m/z	38.9635	0.864583	0	0	0	0	0	0	0.0324113	0	0	0	0	0	0	0	0	0	0	0	0	0	0	29.8683	27.9278	25.8543	28.7257	26.2619	19.1894	21.9044	21.6155	19.1967	18.1215	16.2571	11.8393	14.9968	12.8505	12.1937	10.9789	11.9887	11.9925	15.3597	10.8315	13.7319	28.9044	6.37361	35.2742	36.7309	23.753
0.87_196.8723m/z	196.872	0.87	0	0.361908	0	0	0	0	0	0	0	0	0	0	0	0	0	0	0	0.0950021	0	0	0	481.269	480.657	506.572	482.047	480.461	325.201	392.111	301.649	331.653	291.912	287.309	199.708	230.137	244.023	224.79	195.507	204.763	253.868	223.003	228.064	227.753	546.795	90.0404	104.832	425.641	126.374
1.16_284.9930m/z	284.993	1.1632	0	0	0	0	0	0.0300049	0	0	0	0.0178347	0	0	0	0	0	0	0	0	0	0	0	14.9963	13.8028	14.4972	16.9703	12.9516	17.4106	11.611	10.4938	11.8382	8.58517	12.2684	5.61942	5.64942	4.85505	6.23397	6.84624	6.67085	7.39784	2.37244	5.41865	5.10723	8.77683	35.8686	31.3222	17.5889	32.4179
2.96_589.2256m/z	589.226	2.95883	0	0	0	0	0	0	0.0500905	0	0	0	0	0	0	0	0	0	0	0	0	0	0	51.2548	60.3497	40.7144	43.5721	45.667	32.0223	45.4381	28.9095	37.8657	24.6322	33.025	30.6976	15.6099	24.6465	22.8785	19.1411	16.4028	14.7187	12.891	16.3372	12.3953	104.58	8.02518	27.7077	79.5117	37.9295
1.21_615.0351m/z	615.035	1.20643	0	0	0	0.0534741	0	0	0	0	0	0	0	0	0	0	0	0	0	0	0	0	0	50.1035	43.1208	50.4084	55.3985	44.4351	28.816	43.9634	30.2705	30.008	25.5342	29.2188	18.7638	12.3698	15.5649	10.404	10.2894	13.0099	16.4209	15.8399	16.9224	14.626	118.79	1.3556	12.2285	67.0862	3.96307
3.44_426.2121m/z	426.212	3.43917	0	0.506317	0	0	0	0	0	0	0	0	0	0	0.482666	0.166638	0	0	0	0.523285	0	0	0	1072.49	1076.87	1105.52	1089.45	1090.57	1040.89	1026.46	973.068	969.346	879.808	886.183	763.376	688.99	668.86	659.053	657.966	606.536	576.748	593.057	676.25	593.994	3659.88	74.8928	15.5279	127.407	22.8046
0.99_571.2340m/z	571.234	0.986867	0	0.438354	0	0.131118	0	0	0	0	0	0	0	0	0	0	0	0	0	0	0	0	0	324.201	325.378	359.613	334.047	337.965	367.528	355.349	306.082	321.127	288.063	279.437	216.758	175.98	146.708	168.576	171.374	154.908	158.343	153.446	163.177	158.636	369.711	202.905	258.34	232.174	113.756
0.86_190.9126m/z	190.913	0.859183	0	0.00079767	0	0.000708304	0	0.0233639	0	0	0	0.227333	0	0	0	0	0	0	0	0	0	0	0	148.157	132.234	140.446	127.612	140.727	87.2761	102.612	99.743	95.5039	93.971	97.4443	60.2123	45.2209	55.0392	46.4409	39.2221	38.681	51.8654	49.9492	43.9012	50.8558	54.382	14.3054	326.402	168.589	108.973
3.15_312.1307m/z	312.131	3.14597	0.74369	0.311662	0	0	0.162781	0.73742	0	0	0	0	0.432373	0.617676	0.76529	0	0	0.0369664	0	0	0	0	0.656211	3051.31	3071.82	2998.12	3024.75	2967.67	2426.18	2510.99	2333.49	2456.01	2121.29	2163.32	1757.09	1962.68	1695.23	1697.08	1631.35	1508.59	1572.6	1539.23	1768.16	1592.08	5652.99	524.46	2409.66	4389.46	2455.11
1.18_169.0363m/z	169.036	1.1794	2.89079	0.488254	1.3045	0.902755	2.09496	0.728714	0.984341	1.13063	0.630043	0.876769	0.464255	0.958492	0.308791	0.0757321	0.786178	0.504262	0.128518	0.413392	0.611126	0.482492	0.111363	7070.31	7005.36	7156.21	7090.24	7219.86	6314.75	6561.81	6173.06	6060.57	5527.9	5526.02	4236.87	3363.72	3023.65	3119.39	2904.3	2993.93	3056.8	3289.37	2858.15	2964.03	5927.09	4940.67	10386.7	9463.74	5806.67
1.40_322.0772m/z	322.077	1.40437	0	0	0.588669	0	0	0	0	0	0	0.443909	0	0	0	0	0	0	0	0	0	0	0	722.93	690.293	693.549	709.856	667.688	498.637	553.324	519.563	529.561	451.276	458.03	340.094	341.278	348.189	346.504	297.83	314.815	338.723	356.643	321.038	344.783	1532.41	381.967	396.396	1163.84	349.74
1.22_393.9831m/z	393.983	1.21723	0	0	0	0.36147	0	0	0	0.0027642	0.152557	0.392261	0	0.0149763	0	0	0	0	0	0	0.139877	0.0017927	0	651.644	625.839	631.418	634.906	652.513	502.501	468.308	448.085	437.203	419.499	408.909	288.718	287.932	284.511	271.74	251.982	250.735	266.199	313.555	241.165	286.476	853.076	237.775	352.366	620.592	252.78
3.97_412.0361m/z	412.036	3.97367	0	0.0165198	0.022774	0	0	0	0	0.176184	0	0	0	0	0	0	0	0	0	0	0	0	0	51.0841	52.7556	65.3899	54.0982	53.9332	54.5772	48.8026	43.2074	52.0254	38.3201	36.158	37.2555	23.7544	29.3195	30.9296	24.8968	22.2107	26.1474	24.3477	28.6595	23.033	69.1634	17.7423	13.0889	42.8804	40.0189
0.95_456.1818m/z	456.182	0.94905	0	0	0	0	0	0	0	0.443893	0	0.292786	0	0	0	0	0	0	0	0	0	0	0	361.147	335.724	308.808	299.4	306.685	356.529	318.741	317.518	308.43	290.009	292.048	206.281	114.047	186.418	178.42	166.859	152.557	162.942	161.907	156.587	164.683	266.615	582.98	246.459	120.924	118.435
0.79_357.1884m/z	357.188	0.788933	0	0	0	0	0	0	0	0	0.105342	0	0	0.371933	0	0	0	0	0	0	0	0	0	272.938	256.921	258.812	263.093	251.047	270.941	258.342	237.631	256.375	216.263	221.213	165.118	117.597	155.227	162.501	148.954	163.304	146.122	137.531	136.988	143.226	614.995	99.5808	187.916	367.894	209.449
1.42_375.9967m/z	375.997	1.42058	0	0	0	0	0	0	0	0	0	0.0416109	0	0	0	0	0.0312158	0	0	0	0	0	0	68.954	60.4972	60.8625	55.3888	57.2496	35.7234	47.0137	33.433	37.4878	30.4092	30.3644	12.1054	18.7473	25.4281	21.9827	19.5022	13.68	19.8595	17.392	16.5874	23.5494	73.5174	34.7094	28.5595	85.3725	25.3087
4.11_350.0588m/z	350.059	4.10675	0	0.0308462	0	0	0	0.0461447	0	0	0	0	0	0	0	0	0.0165705	0.0254596	0	0	0	0	0	98.9144	86.328	89.3498	89.1242	76.8242	60.2864	56.0904	50.0087	47.9777	33.3711	41.3526	41.9912	42.2499	51.4383	39.5356	44.4387	35.3436	36.3758	36.2199	42.7383	40.5546	210.25	21.0361	39.2262	59.1108	50.7739
1.42_262.0386m/z	262.039	1.42058	0.831303	0.240571	0.587646	0	0.233747	0	0.327871	0.438812	0.607527	0.314107	0	0	0	0.39119	0	0	0	0	0	0	0	2485.86	2363.4	2338.96	2340.66	2259.54	1732.17	1801.92	1649.99	1662.62	1492.23	1520.36	1169.59	1145.19	1242.99	1258.39	1095.75	1201.46	1264.66	1337.88	1191.2	1247.58	4115.96	886.131	1636.47	3140.65	1655.3
2.04_456.2087m/z	456.209	2.0394	0	0	0	0	0	0	0	0	0	0	0	0	0.347696	0	0	0	0	0	0	0	0	189.216	172.909	194.833	188.51	208.391	161.378	162.509	161.889	148.918	141.558	145.797	112.046	80.9047	94.1309	101.829	100.445	97.9225	88.5412	95.8416	95.6166	100.411	522.37	111.354	82.5026	503.785	92.6724
1.18_346.1247m/z	346.125	1.1794	0	0	0	0	0.00633681	0	0	1.28706	0	0	0.724799	0	0	0	0.0417493	0	0	0	0	0	0	1169.81	1122.34	1135.26	1149.85	1117.66	981.523	989.377	915.589	922.657	828.833	862.573	643.51	524.88	503.085	502.6	474.194	485.456	497.614	528.971	477.025	493.598	2345.59	439.26	884.433	1748.25	912.868
3.97_383.0814m/z	383.081	3.97367	0	0	0	0	0	0	0	0	0	0	0	0	0	0	0.205154	0	0	0	0	0	0	101.441	98.8287	96.7404	108.877	101.737	79.8724	81.5006	63.3157	73.6449	58.5408	60.205	60.4994	49.8845	53.6676	52.694	51.9478	40.8826	51.2203	44.2455	50.7902	39.5258	185.628	33.9649	54.0397	117.273	60.3556
1.02_338.0943m/z	338.094	1.0193	0	0.12909	0	0	0	0	0	0	0	0	0	0	0	0	0	0	0	0	0	0	0	91.5073	78.976	86.9833	81.7115	85.8795	76.9836	68.2833	56.0766	58.6581	54.5692	56.8243	38.7971	32.4634	30.9494	33.9198	25.1083	27.7395	24.774	26.982	28.4925	31.9964	159.112	34.1972	54.9389	139.107	60.2694
2.48_504.9815m/z	504.982	2.4839	0	0	0	0	0	0	0.164932	0	0	0	0	0	0	0	0	0	0	0	0	0	0	97.6263	94.9905	103.385	102.62	100.375	71.1561	77.4887	70.5867	58.809	59.0999	54.5031	46.7175	53.9543	37.2561	38.0291	36.6954	35.2429	34.9212	39.7716	46.1412	47.1348	248.015	34.2096	57.9124	171.573	67.8015
3.15_384.1152m/z	384.115	3.15137	0.617432	0	0.741135	0	1.49176	0.419922	0.472595	0	1.01237	0.457599	0	0	0	0.146042	0	0	0.389391	0	0	0	0	3358.12	3372.65	3340.54	3327.46	3251.18	2529.32	2633.52	2404.3	2556.13	2153.62	2204.59	1714.11	1865.72	1652.02	1705.79	1588.53	1496.89	1537.14	1591.63	1762.29	1571.04	6192.47	1169.25	2653.96	4283.97	2414.82
0.81_599.1652m/z	599.165	0.80515	0	0	0	0	0	0.348145	0	0	0	4.30702e-05	0	0.0455781	0	0	0	0.0355566	0	0	0	0	0	196.697	203.801	204.389	184.651	185.248	216.658	182.7	157.97	168.669	160.529	146.139	134.919	87.2135	101.873	102.181	102.218	102.639	93.8087	102.392	103.197	88.6025	397.902	97.8744	137.671	355.966	152.232
2.80_516.9889m/z	516.989	2.79872	0	0.296138	0	0.218536	0	0	0	0	0	0	0.263	0	0	0	0.0856069	0	0	0	0	0	0	458.061	485.841	474.273	434.195	454.17	368.936	380.363	398.666	362.523	319.924	338.28	249.622	249.255	223.532	210.717	206.677	190.502	201.593	208.107	238.87	214.993	1280.01	145.834	248.633	820.472	243.261
4.33_304.1295m/z	304.13	4.33173	0	0	0.00505174	0	0.331619	0	0	0	0	0.991013	0	0	0	0	0	0	0	0.126306	0	0	0	502.143	512.466	506.615	513.789	498.654	505.393	481.479	469.166	494.395	413.399	438.46	418.064	364.41	352.488	361.664	329.839	306.729	315.173	319.513	338.601	293.349	600.402	132.678	310.281	601.074	629.933
1.03_286.1407m/z	286.141	1.0301	0	0	0	0.208427	0	0	0	0	0.758458	0	0	0	0	0	0	0	0	0	0	0	0	513.774	484.819	491.054	476.023	490.131	401.111	400.775	363.711	363.171	332.066	317.994	251.242	210.804	209.037	221.151	205.941	202.936	213.5	215.326	219.712	216.857	922.124	277.454	277.805	708.979	297.438
0.88_478.0922m/z	478.092	0.8808	0	0	0	0	0	0	0	0	0	0	0	0	0	0	0	0.120248	0	0	0	0	0	68.6698	68.3432	72.4771	65.4031	76.2332	51.7448	40.658	44.6397	47.9233	32.3892	40.4906	28.048	31.6301	37.2157	32.2868	27.2818	27.8013	25.3512	31.3852	23.6723	32.3356	71.4976	41.3325	44.681	28.9651	12.2408
0.84_531.1760m/z	531.176	0.837567	0.00186477	0	0	0.203908	0	0	0	0	0	0	0	0	0	0	0	0.0727605	0	0	0	0	0	198.012	191.506	175.191	156.041	167.39	125.673	141.614	123.327	126.275	129.493	114.485	85.6312	74.7212	58.0116	42.7605	55.1987	49.718	52.9812	48.1312	45.4787	55.6049	172.084	48.3564	136.146	156.451	29.9881
1.15_229.1552m/z	229.155	1.15238	2.87248	1.90663	0.91394	3.70233	1.39654	1.41942	2.77386	0.28482	0.595134	1.56206	1.85386	0.877261	0.277794	1.21625	1.09354	0.640382	0.600496	0.912681	0.101828	0.519335	0.0129138	12325.8	11949.1	11984.9	11783.6	11849.6	10634.1	10323.3	9742.82	9979.8	9118.11	9197.91	7458.22	6199.63	6308.56	6710.45	6039.27	6368.71	6474.33	6848.36	6364.31	6432.49	19682.9	3540.01	6652.2	13946.3	9335.72
0.88_287.2446m/z	287.245	0.8808	0	0	0.156113	0.107672	0	0.229645	0	0	0	0	0	0	0	0	0	0	0	0	0	0	0	220.516	218.299	212.18	212.359	211.742	144.561	185.631	173.217	173	150.761	136.721	105.863	121.698	118.971	116.888	101.695	109.148	124.898	130.967	111.475	130.554	332.605	69.9176	371.723	209.824	135.276
3.98_413.1416m/z	413.142	3.97907	0	1.81964	1.9535	0	1.20432	0	0	0.325424	0.599655	0	0.00585178	0	0	0	0	0.0361575	0	0	0	0	0.572296	2579.35	2576.18	2548.96	2606.16	2505.73	2476.85	2400.08	2291.78	2398.15	2007.67	2093.37	1929.36	1851.69	1741.99	1693.01	1558.69	1550.28	1576.51	1557.55	1768.8	1479.7	5498.09	791.518	1930.91	4075.58	2161.05
3.51_422.2130m/z	422.213	3.50943	0	1.1875	0	0	0	0	0	0	0.405426	0	0.242661	0	0	0	0	0	0	0.485077	0	0	0	1129.6	1102.99	1082.66	1065.32	1090.38	883.552	877.389	821.275	874.085	741.778	751.364	629.653	688.962	661.404	616.613	593.077	571.126	600.547	575.573	656.668	601.114	2153.52	354.746	542.679	2288.29	717.985
0.89_381.1968m/z	381.197	0.8862	0	0	0.00284003	0	0	0	0	0	0.0360036	0	0	0	0	0	0	0	0	0	0	0	0	11.1975	13.647	10.4251	11.0988	16.0254	13.7659	5.83479	10.1627	10.2409	8.73135	15.2867	7.35387	7.424	6.34764	6.81471	5.34111	7.04285	5.11241	3.68441	7.97994	11.6852	17.9201	6.25564	7.67599	11.7352	6.02965
0.82_309.1657m/z	309.166	0.82135	0	0	0.000313222	0.423029	0	0	0.00492283	0.00450403	0	0	0	0	0	0	0.0071049	0	0	0	0	0	0	132.099	113.823	126.976	116.703	125.437	117.888	120.51	111.321	107.982	94.252	99.9485	76.9884	65.9276	50.3532	70.6007	61.3308	66.2235	60.0324	58.1639	52.8717	62.8525	205.149	184.742	58.4781	146.359	89.7943
2.96_334.1863m/z	334.186	2.96423	0	0	0	0	0	0.655548	0	0.111524	0	0	0	0.323654	0	0	0	0	0	0	0	0	0	585.386	550.908	575.084	591.625	556.431	434.555	461.751	438.128	429.75	380.987	400.779	317.694	323.696	266.515	283.303	267.955	235.952	258.692	264.512	310.317	241.991	1224.22	262.352	191.111	1259.28	193.572
3.87_368.1276m/z	368.128	3.87288	0	0	0.520203	0	0	0.129716	0	0.792999	0.131096	0	0	0	0.320487	0	0.293732	0	0	0	0.243622	0	0	962.385	956.512	980.667	995.178	962.967	850.186	813.4	773.02	821.068	674.72	703.595	630.006	620.025	583.516	566.922	536.672	488.499	510.639	516.375	578.284	495.649	256.712	32.9446	51.4167	139.959	3674.23
0.93_647.0995m/z	647.1	0.927433	0	0	0	0.214874	0	0	0	0	0	0	0	0	0	0	0	0	0	0	0	0	0	119.641	124.297	120.052	126.504	125.441	87.7991	52.9783	67.3434	53.722	55.535	56.074	64.068	59.2524	60.0708	49.1728	47.0803	51.7051	55.826	49.7174	53.6671	60.4093	101.043	51.27	33.7086	71.214	29.9404
3.16_376.1698m/z	376.17	3.15677	0	0	0	0	0	0	0	0	0	0.14246	0	0	0	0	0	0	0	0	0	0	0	72.7238	56.2813	70.5964	78.298	62.8371	50.3987	56.4544	49.0777	56.752	42.4468	47.9858	30.0296	34.883	42.9183	34.4919	28.5551	30.6367	30.1235	33.6292	32.2384	26.9498	134.043	17.8718	26.3734	105.088	31.7398
0.86_284.9980m/z	284.998	0.859183	0.000520227	0	0	0.213011	0	0	0	0	0	0	0	0	0	0	0	0	0	0	0	0	0	72.7814	66.3385	70.6914	65.9757	68.6373	57.4424	51.6085	54.2094	53.8725	46.6357	51.8457	35.5651	35.6508	36.2715	29.4285	26.3824	25.1445	26.7954	27.7116	23.0893	26.5645	66.9245	28.1173	52.6778	58.1382	23.1337
4.07_319.0384m/z	319.038	4.07093	0	0	0	0.0313721	0	0	0	0	0	0	0	0	0	0	0	0	0	0	0	0	0	13.936	7.83407	15.0144	13.8043	13.3844	12.9205	12.0334	11.6256	7.94507	4.76066	11.8477	6.98393	13.4096	10.8847	8.89021	9.45994	8.40563	7.6488	5.85921	11.2224	6.84348	41.3698	4.64666	9.21538	5.36913	14.1078
0.82_627.2009m/z	627.201	0.82135	0	0	0	0	0.459779	0	0	0	0.110605	0	0	0	0	0	0	0	0	0.294832	0	0	0	359.883	352.293	387.606	355.135	371.019	335.292	353.328	321.626	329.807	285.777	291.218	224.244	166.97	155.6	164.609	169.381	170.939	151.411	144.387	134.654	145.648	733.745	211.804	319.447	664.287	427.306
0.88_264.8485m/z	264.848	0.8754	0	0.176817	0.0473039	0	0	0	0	0	0	0	0	0	0	0	0	0	0	0	0	0	0	114.017	103.08	99.1225	102.613	104.017	78.4962	90.806	84.7627	87.4275	82.1258	85.3234	39.6579	48.3669	54.1301	55.4253	44.5747	54.135	53.2478	54.8679	52.3272	48.9673	72.4789	0.791239	172.304	205.892	30.4843
1.27_387.1411m/z	387.141	1.27467	0	0	0	0	0	0	0	0	0	0	0.00833456	0.443054	0	0	0	0	0	0	0	0	0	211.688	206.23	206.931	207.548	211.019	149.981	165.566	140.784	132.776	121.792	130.648	104.582	82.1445	100.125	106.94	87.3767	105.165	96.219	104.523	97.1425	85.7234	487.867	59.7205	127.092	300.66	141.981
1.21_407.0318m/z	407.032	1.21183	0	0	0.143152	0	0	0	0.112928	0	0	0	0	0	0	0	0	0	0	0	0	0	0	131.555	114.921	123.284	115.411	111.183	90.0191	100.254	96.5844	90.8443	78.4014	83.9275	46.6918	39.866	54.9701	52.472	48.484	42.9034	47.5695	57.5841	43.6609	51.9646	250.946	22.4611	62.0436	153.787	67.3253
1.91_257.1138m/z	257.114	1.9063	0.140381	0	0	0	0.40063	0	0.0472942	0	0	0	0	0	0	0	0	0	0	0	0	0	0.397176	416.211	394.214	386.135	392.548	386.369	299.431	294.139	266.916	273.61	232.256	219.478	153.627	124.61	125.194	123.651	108.675	105.451	100.268	97.8001	95.9129	91.7285	1251.41	164.213	489.805	988.008	470.839
1.10_542.0605m/z	542.061	1.10375	0	0.430904	0	0	0	0	0	0	0	0	0	0	0	0	0	0	0	0	0	0	0	287.7	235.534	238.754	244.306	243.473	171.068	140.702	126.355	114.739	114.836	139.239	94.9219	62.4326	89.1154	93.5132	81.6735	83.2568	82.5048	85.1173	65.1512	75.5068	344.619	87.9781	151.443	346.836	138.135
4.05_360.2019m/z	360.202	4.04932	0	0	0	0	0	0	0	0.394013	0	0	0	0	0	0	0	0.866128	0	0	0	0	0	522.771	552.927	531.243	546.41	522.762	399.948	432.393	391.947	391.529	367.662	358.174	329.951	370.366	339.072	324.634	309.836	298.987	306.454	323.518	340.027	333.21	710.599	162.305	162.898	850.415	246.232
2.34_245.1501m/z	245.15	2.3434	0.110482	0.0362306	0.0503733	0	0.414504	0.280459	0.0152503	0	0	0	0	0.150558	0	0	0.100301	0	0	0	0	0.113725	0	502.449	474.212	474.761	480.494	476.476	420.394	406.774	387.47	397.374	336.186	346.247	269.559	217.498	232.652	236.259	220.311	218.344	226.36	248.155	231.9	225.192	1465.82	161.381	280.14	809.349	282.73
1.10_282.1202m/z	282.12	1.10375	0	0.114397	0.966585	0.842733	0.129189	0	0.360382	0.330591	0.213948	0.493503	0	0.0212261	0	0.0935593	0.807001	0.697232	0	0	0	0.0827805	0.345016	2177.55	2051.51	2010.38	1981.35	1994.71	1731.48	1616.61	1413.91	1440.79	1352.91	1402.25	1167.86	954.436	1049.07	1126.3	1020.74	1076.18	1035.83	1102.59	1018.07	1021.08	3538.5	766.332	1363.51	2870.54	1359.21
2.93_512.9898m/z	512.99	2.93182	0.00515526	0	0	0	0.00358486	0.546967	0	0	0	0	0.436035	0	0	0	0	0	0.0626204	0.544128	0	0	0	633.414	631.321	627.268	637.159	612.896	569.24	569.585	520.552	541.575	491.577	475.464	367.511	352.09	311.165	342.201	322.403	296.766	278.177	317.169	345.316	282.067	1672.12	174.657	376.495	1050.81	380.894
4.10_265.1185m/z	265.119	4.10135	3.53067	1.00384	1.05114	0.711539	0.542503	1.56847	0.439728	0	1.04708	0.220444	0.695176	0.246658	1.02753	0.188431	1.30468	1.47056	0.671227	1.08078	1.24918	2.67135	0.555252	7583.35	7510.89	7373.43	7325.29	7251.44	6324.99	6078.78	5842.53	6060.1	5205.66	5536.43	5437.55	6016.57	5800.23	5688.7	5308.31	5066.19	5215.71	5229.8	5730.94	4949.84	31307.7	1732	4152.89	5562.53	4483.67
0.87_180.8993m/z	180.899	0.87	0.155232	0.0358077	0	0.098121	0	0	0	0	0.0272134	0.194557	0	0	0	0	0	0	0	0.0751713	0	0	0	270.209	261.945	265.301	264.904	260.27	187.608	219.264	172.787	186.547	162.396	156.158	112.346	133.143	139.977	132.4	108.166	119.365	135.684	130.581	125.289	127.996	178.886	38.0243	46.7399	129.867	20.4045
1.01_329.0485m/z	329.048	1.01388	0.241989	0	0	0	0	0	0	0	0	0	0	0	0	0	0	0	0	0	0	0	0	112.216	104.062	110.947	113.588	111.6	88.2491	87.923	76.4292	81.2046	67.984	81.8331	54.7844	42.5191	35.6127	39.4343	35.3018	33.357	29.1552	39.2433	37.2338	41.8412	267.745	53.6082	108.722	166.317	108.209
0.85_475.0624m/z	475.062	0.848383	0	0	0	0	4.85986e-05	0	0.064279	0	0	0	0	0	0	0	0	0	0	0	0	0	0	38.0932	32.1752	36.1351	32.5216	39.1985	21.608	27.3083	24.6479	21.8247	19.5521	17.7537	14.7256	7.4343	5.48838	13.3935	4.52657	4.23938	7.22581	5.00614	8.63588	5.33518	53.6078	16.1025	22.5229	32.4802	7.83642
1.30_230.1852m/z	230.185	1.29628	0.0166106	0	0	0	0	0.436788	0	0.352196	0	0.0171115	0	0.00926968	0	0	0.151009	0	0	0	0	0	0	381.914	366.643	331.188	368.708	353.958	308.287	288.995	280.199	284.75	261.998	257.569	223.264	161.994	203.131	215.286	199.654	209.561	198.949	209.79	199.731	191.821	616.39	122.88	362.703	417.623	212.003
2.71_563.5128m/z	563.513	2.70685	0	0	0	0.222996	0	0	0	0	0	0	0	0	0.134912	0	0	0	0	0	0	0	0	142.595	148.122	122.294	146.811	134.952	122.136	126.114	111.207	106.145	103.545	106.52	77.3933	68.858	60.3378	67.6065	68.6811	60.9183	68.3618	71.8302	71.5643	67.1076	414.787	46.6034	79.6231	180.081	97.6522
1.40_499.1167m/z	499.117	1.39897	0	0	0	0	0	0	0	0	0	0	0	0	0	0	0.419922	0	0	0	0	0	0	203.659	192.395	188.223	199.488	185.788	137.124	142.693	139.706	133.895	117.357	125.029	94.3091	82.7558	81.3003	88.9058	73.3502	85.5298	85.3918	82.905	70.7207	85.5197	400.632	89.441	149.219	224.356	152.192
0.93_656.2006m/z	656.201	0.932833	0.581757	0	0	0	0	0	0	0	0	0	0	0	0	0	0	0	0	0	0	0	0	210.626	214.641	214.897	202.059	212	196.237	151.827	160.849	159.179	127.671	151.295	117.868	101.301	115.875	110.306	103.766	107.967	112.115	102.584	111.913	121.286	195.361	91.3037	177.779	229.293	65.7905
5.36_499.1591m/z	499.159	5.36265	0	0	0	0	0.0493654	0	0	0	0	0	0	0	0	0	0	0	0.0165706	0	0	0	0	25.4871	24.4814	29.7207	17.1017	19.1979	24.6797	16.8294	18.71	16.9973	9.71625	19.0558	14.8988	16.5635	19.8127	15.7543	11.4149	13.1741	8.88009	9.24079	14.0465	7.83731	41.6923	3.74767	8.90917	23.5068	12.9358
0.88_313.1066m/z	313.107	0.8754	0	0.49147	0	0	0	0	0	0	0	0	0	0	0	0	0	0	0	0	0	0	0	211.319	224.008	214.076	196.111	211.645	145.802	161.669	144.36	155.951	148.508	134.968	84.8854	89.9737	107.752	99.0219	79.9121	86.7824	92.5172	88.4413	94.6581	101.062	303.453	54.4629	222.118	346.106	195.097
0.82_325.1609m/z	325.161	0.81595	0.373467	0.303605	0.441406	0.409744	1.20934	0	1.31271	0.295573	0	0	0.433762	0	0	0	0	0	0	0	0	0.260834	0	1395.18	1460.76	1485.72	1445.73	1459.98	1456.86	1419.96	1370.48	1340.13	1184.17	1197.92	982.033	791.294	767.091	815.543	768.112	813.294	770.783	754.967	706.325	722.999	3418.44	944.401	1090.04	2483.95	1640.02
0.90_527.1446m/z	527.145	0.897017	0.346497	0.778592	0.155518	0.445904	0	0	3.18347e-05	0	0	0	0	0	0	0	0	0	0	0	0.0191296	0	0	522.031	504.212	510.86	486.693	522.606	429.178	393.541	364.915	365.03	319.715	335.553	315.581	311.678	335.087	294.706	264.654	285.138	298.378	295.832	282.663	318.712	418.694	339.098	466.442	647.706	355.842
2.56_595.5328m/z	595.533	2.56295	0	0	0	0	0	0	0	0.223724	0	0	0	0	0	0	0	0	0	0	0	0	0	94.1141	100.069	82.0689	72.4926	92.9146	57.2537	84.0042	58.4333	75.9907	60.6157	70.0949	54.86	37.7834	38.2929	35.542	45.2025	42.6535	47.9542	49.265	33.0994	36.8138	314.801	17.2988	41.9187	139.971	66.9074
1.04_405.1625m/z	405.162	1.0355	0	0	0	0	0	0	0	0	0	0	0	0	0	0	0.352051	0	0	0	0	0	0	152.399	148.837	151.442	152.756	152.972	114.582	112.732	115.537	108.862	102.666	97.3979	79.3144	57.1432	59.916	60.7144	62.9716	65.391	65.2785	68.3911	67.5614	68.9641	322.55	51.8274	98.8325	226.798	100.45
0.98_243.0981m/z	243.098	0.981467	0.0709936	0.696352	0.934213	0	0.299782	0.418653	0.980491	0.650719	0	0	0.0691641	0	0.442848	0	0.331909	0	0	0.132776	0.0266535	0.357835	0	1573.56	1543.05	1546.72	1549.99	1547.89	1532.58	1529.62	1358.02	1392.64	1235.21	1271.59	1003.53	804.023	825.993	859.752	803.099	785.79	816.517	798.412	773.439	796.387	3309.64	686.659	1053.42	2553.69	1014.21
0.93_478.1646m/z	478.165	0.932833	0	0	0	0	0	0	0	0	0	0	0.406601	0	0	0	0	0	0	0	0	0	0	183.728	173.647	174.126	156.997	164.618	137.931	92.233	118.9	106.336	104.253	111.499	91.5763	72.7568	87.5516	91.6302	67.724	78.3364	78.8855	78.7421	71.2447	82.1671	88.5706	61.7862	163.558	57.7975	17.7753
2.48_290.1603m/z	290.16	2.4839	0.442529	0.235519	0.131359	0.498901	1.47023	0.216415	1.45232	0	1.33455	0.358275	0.223389	0.0911639	0	0.780533	0.351558	0.354285	0	0.0438349	0.33857	0.116256	0.631653	3660.05	3464.91	3437.98	3399.77	3352.91	2564.2	2700.44	2488.84	2547.75	2245.57	2301.06	1885.34	1862.1	1956.85	1894.99	1721.7	1741.51	1911.77	1933.2	1945.41	1771.29	6724.41	1078.04	1662.94	5365.2	1552.47
2.87_227.1033m/z	227.103	2.86697	0	0.424794	0	0	0.478069	0.279877	0.406616	0	0	0	0.270157	0	0	0	0.332068	0.00540289	0.0884745	0.384038	0	0	0.388618	1104.42	1052.91	1035.95	1002.87	978.008	854.723	804.387	782.515	818.347	674.572	755.569	644.292	641.287	634.011	657.353	616.525	590.614	561.797	615.941	719.802	589.668	1104.58	256.106	1265.99	1626.5	719.581
0.92_423.0649m/z	423.065	0.922017	0	0	0.148239	0	0	0	0	0	0	0	0	0	0	0	0	0.193558	0	0	0	0	0	120.736	106.555	106.353	108.74	122.245	75.9037	71.3534	62.568	64.3294	50.1375	66.9767	46.5715	58.2441	55.23	54.4499	42.7545	43.6582	45.3183	47.3065	45.8441	63.2018	111.853	28.0945	116.986	99.8403	40.6089
2.03_341.0844m/z	341.084	2.034	0	0	0	0.145089	0	0	0	0	0	0	0	0	0	0	0	0	0	0	0	0	0	47.1353	47.0665	54.8984	55.2723	53.4499	54.0359	45.4004	44.743	42.1272	35.4646	37.2202	28.2378	20.9083	17.9697	18.6194	25.394	19.0506	18.3429	18.9851	17.7687	18.6853	129.456	13.8769	36.8416	119.089	41.0354
2.93_455.4310m/z	455.431	2.93182	0	0	0	0.0734184	0	0	0	0	0	0	0	0	0	0	0	0	0	0	0	0	0	23.3746	18.6328	29.0832	29.6549	20.7271	29.5759	17.7783	26.8552	19.742	21.8407	17.8915	8.20834	11.4437	8.95033	10.6648	10.3935	5.58483	10.1619	7.97501	13.1612	4.53669	78.9657	11.755	10.9254	67.5555	7.12753
1.40_286.0565m/z	286.057	1.40437	0.189026	0	0	0	0	0	0	0.242684	0	0	0	0.250084	0	0	0	0	0	0	0	0	0	257.956	248.734	247.13	254.793	257.827	204.871	191.975	192.012	188.34	166.471	173.675	126.453	125.28	127.848	130.227	108.488	114.648	129.938	134.351	114.677	121.976	525.251	147.567	152.458	422.908	140.011
3.09_724.3331m/z	724.333	3.09192	0.375321	0.00268231	0	0	0	0	1.2821	0	0.677728	0	0	0.900763	0.481842	0	0.815796	0.860658	0	0	0.610495	0	0.264645	1902.8	1952.71	1837.77	1861.59	1851.25	1666.67	1670.91	1604.5	1633.96	1460.91	1458.12	1195.72	1171.11	1060.82	1116.52	1099.08	991.866	1022.28	1065.37	1219.85	1010.12	4946.15	536.423	975.043	2968.92	1139.46
2.56_517.9874m/z	517.987	2.55755	0	0	0	0	0	0	0	0	0	0	0	0	0	0	0	0	0	0	0	0.203949	0	95.7773	93.707	93.4998	100.271	85.4577	79.444	77.8562	82.7861	68.1498	59.7097	59.5752	55.6679	39.3665	36.9396	47.608	33.2135	34.8733	44.7957	47.6646	38.7956	37.7391	342.411	21.5289	43.4323	137.547	64.2195
4.71_303.1958m/z	303.196	4.706	0.134785	0.359102	0	0	0	0.858648	0	1.06753	0	0	0.144211	0.492283	0.394249	0.231222	0.797343	0.0872343	0	0	0	0.04095	0	1180.83	1154.88	1132.34	1182.86	1162.3	1095.11	1068.33	1027.27	1083.93	934.118	989.236	913.635	976.914	888.742	837.281	814.785	786.582	754.531	793.745	874.13	767.888	794.939	210.565	955.379	1621.8	2043.26
1.17_262.1289m/z	262.129	1.1686	0	0	0	0	0.26486	0.221099	0	0	0.490906	0.238635	0	0	0	0	0.318207	0	0	0	0	0	0	432.804	425.14	435.273	426.921	431.72	431.036	399.948	349.811	372.194	341.343	349.266	271.802	217.176	208.535	216.569	203.918	208.661	202.871	197.459	188.788	186.199	639.885	289.329	264.426	602.618	371.507
3.80_318.6772m/z	318.677	3.80263	0	0	0	0	0.38964	0	0	0	0	0	0	0	0	0	0	0	0	0	0	0	0	100.418	118.125	103.292	99.9912	112.355	106.41	96.9609	98.1874	102.47	86.0436	91.5725	72.941	76.4662	69.0003	62.0374	63.9923	52.5105	60.9698	70.4013	69.5416	59.6225	254.184	106.614	85.156	2.32055	54.7865
5.51_330.2275m/z	330.227	5.51195	1.29613	0.436481	1.6245	0.708548	0.767621	0.380707	1.53996	0.36334	1.44642	2.51175	1.52554	1.09661	0.718548	1.14956	2.03072	4.0319	1.1317	0.437176	0.41296	0.750802	0.522799	6827.98	6656.78	6438.25	6507.05	6348.5	5445.4	5254.7	5055.35	5333.79	5182.03	5827.2	5605.22	5962.01	5981.95	5635.3	5290.53	5238.52	5102.38	5730.03	5872.9	5397.16	16434.8	1380.02	3525.37	14775.6	3400.14
0.81_537.6615m/z	537.662	0.80515	0	0	0	0	0.548126	0	0	0	0	0	0	0	0	0	0	0	0	0	0	0	0	138.081	128.452	121.609	136.205	124.613	147.665	130.592	140.267	133.274	111.046	116.582	98.8861	65.4734	78.2709	84.515	86.2901	89.2459	84.9527	79.494	71.077	78.1591	326.31	79.8144	100.412	213.545	125.347
0.98_489.1985m/z	489.199	0.976067	0	0	0	0	0	0	0.445694	0	0.207993	0	0	0	0	0	0	0	0	0	0	0	0	186.807	169.371	165.562	177.297	173.746	175.49	144.488	144.038	135.81	138.712	136.557	104.445	73.989	79.0522	83.4352	74.1617	74.6837	85.05	73.6498	71.0264	82.1913	296.255	131.096	121.064	237.962	94.7005
2.44_247.1290m/z	247.129	2.43527	0.117	0	0	0	0	0	0.0292471	0.599717	0.148349	0.499005	0	0	0.487541	0	0	0	0	0	0	0.0487576	0.0362646	666.503	641.029	645.231	629.87	640.503	475.313	519.22	477.931	516.46	430.93	436.463	321.768	303.11	303.826	285.642	261.987	266.538	296.36	315.84	283.562	284.194	1326.88	191.247	395.981	1117.65	463.062
0.93_494.1407m/z	494.141	0.927433	0	0.155762	0	0	0	0	0	0	0	0	0	0	0	0	0	0	0	0	0	0	0	61.8523	47.0871	52.6289	54.3139	50.196	58.8447	31.984	34.6183	31.7946	28.004	30.0912	35.4821	18.7105	24.0924	23.1106	24.8687	26.4801	27.2612	27.1419	24.6764	28.6999	60.6964	27.7101	58.4557	35.0419	14.2733
1.07_601.2756m/z	601.276	1.06793	0	0	1.14716	0.305206	0.203461	0	0	0.590546	0	0.359017	0.140189	0	0	0.200668	0.180385	0	0.249386	0	0	0	0	1252.78	1156.9	1129.37	1090.04	1098.74	884.208	895.193	785.206	791.469	715.849	712.615	580.389	521.577	533.017	552.963	492.454	527.014	521.701	579.302	517.277	555.571	3259.62	366.589	825.326	1875.98	721.402
1.06_485.1367m/z	485.137	1.05712	0.693237	0	0	0	0	0	0	0	0	0.038165	0	0	0	0	0	0	0	0	0	0	0	286.893	255.564	271.546	263.117	273.02	188.944	199.126	176.59	174.771	160.905	166.635	107.638	106.543	108.79	116.622	93.9982	109.656	109.871	121.916	105	104.982	468.781	88.9298	216.243	489.048	235.878
0.84_521.0578m/z	521.058	0.842967	0	0	0	0	0	0	0	0	0	0	0	0	0.0895691	0	0	0	0	0	0	0	0	37.427	37.5798	44.2129	34.2624	38.1016	30.5426	21.178	26.9234	29.4608	20.4615	19.3902	19.9099	15.4078	13.0816	12.1131	4.54834	7.10095	11.9376	8.07061	5.2174	8.14777	57.9171	9.11591	26.0097	40.7799	7.68429
0.89_543.1323m/z	543.132	0.891617	0	0	0	0	0.519836	0	0	0	0	0	0	0	0	0	0	0.397766	0	0	0	0	0	223.719	224.826	215.012	217.27	217.626	173.564	162.691	146.184	139.603	115.537	137.152	106.38	115.835	107.822	102.934	83.8425	84.5749	100.274	93.9353	100.22	100.484	160.377	310.975	119.797	113.889	84.0724
1.59_357.1773m/z	357.177	1.5915	0	0	0	0	0	0	0	0	0	0	0.345371	0	0	0	0	0.283932	0	0	0	0	0	217.658	218.973	208.622	200.097	206.799	135.528	155.964	141.803	144.409	132.718	133.165	96.8291	93.3148	94.7912	102.691	94.3665	94.2202	93.4272	100.08	90.7083	92.9266	481.012	34.1703	150.778	328.902	146.706
0.99_359.1561m/z	359.156	0.986867	0	0	0	0	0	0	0	0.365082	0	0	0	0.609405	0	0	0	0	0	0	0	0	0	249.106	233.471	255.279	252.296	244.658	249.081	242.265	231.26	224.378	200.897	224.058	153.56	121.4	119.564	133.135	126.427	122.929	119.559	121.818	118.291	113.996	593.93	124.052	167.8	388.427	185.437
2.80_687.3166m/z	687.317	2.79872	0	0	0.0634395	0	0	0	0	0	0	0	0	0	0	0	0	0	0	0.142074	0	0	0	75.3163	77.4225	71.7465	90.4382	86.2496	46.7855	67.098	59.9865	54.4459	50.6325	49.1886	30.0299	30.1586	34.2738	43.592	29.3798	16.1943	32.1172	31.5991	32.5276	29.8069	286.734	18.5237	38.9594	128.788	36.1672
2.44_542.9168m/z	542.917	2.44067	0.162506	0	0	0	0	0	0	0	0	0.0571941	0	0	0	0	0	0	0	0	0	0	0	81.2996	77.397	61.0286	63.6324	63.5221	52.744	56.8002	56.9555	43.9997	37.8882	46.0624	28.2907	25.5675	37.05	28.2995	24.1848	32.1045	34.6758	29.8231	27.0095	28.8428	202.021	22.1197	21.494	94.6721	35.4266
3.77_621.6363m/z	621.636	3.77022	0.359528	0.882477	0	0	0.191598	0	0.566528	0.0214668	0.00771575	0	0	0	0	0	0	0	0	0	0	0	0	360.318	363.501	344.343	368.62	388.046	328.003	310.552	304.38	318.713	257.469	267.647	218.627	238.275	233.523	216.638	217.26	189.054	213.093	219.311	212.891	198.737	548.973	162.425	292.523	426.081	361.088
0.94_450.1321m/z	450.132	0.938233	0.330572	0	0	0	0	0	0	0	0	0	0	0.260193	0	0	0	0	0	0	0	0	0	104.771	104.047	102.75	97.3842	120.033	94.6873	80.5472	83.8279	83.318	74.9223	71.3517	62.9114	41.4388	56.494	47.8226	48.9579	49.7061	37.7109	45.6244	40.2452	42.9521	122.078	232.573	81.0107	76.6531	46.4026
1.18_341.0477m/z	341.048	1.18482	0	0	0	0.17412	0.00588935	0.412255	0.0284842	0	0.249046	0.548694	0.295394	0.15156	0	0.202519	0	0	0	0	0	0	0	625.008	600.065	611.818	617.246	616.611	503.906	526.9	457.584	476.559	426.454	420.404	311.035	269.696	264.302	257.536	247.83	249.677	261.178	268.312	243.491	255.912	1120.69	286.588	445.663	890.381	596.123
0.90_374.0966m/z	374.097	0.897017	0	0	0	0	0	0	0	0	0	0	0	0.12242	0	0	0	0	0	0	0	0	0	38.0088	28.5649	30.9736	35.3904	28.7637	23.7167	21.7806	15.5328	17.9748	19.1407	23.1052	13.8788	16.8826	17.4671	13.8017	13.8593	14.6076	14.8978	12.3724	13.7716	17.6073	83.9312	18.8445	22.4199	54.7601	32.453
4.40_243.1344m/z	243.134	4.39658	0.764444	0.573608	0.0524266	0.731153	0.627808	1.69405	1.63383	0	0.313431	0.399379	0.0173503	0	0.715082	0	0	0.425162	0.764092	1.20211	0.655853	0.134928	0	2829.15	2789.31	2712.57	2770.45	2725.74	2238.33	2196.04	2158.14	2246.18	1926.52	1944.16	1861.09	2181.36	2078.63	1948.44	1873.04	1765.01	1813.73	1875.14	2084.36	1793.74	8461.17	552.691	1941.43	3460.37	1791.57
4.11_303.0747m/z	303.075	4.11215	0	0.0033208	0.209427	0	0	0	0.236212	0.0915527	0	0	0	0	0	0	0	0	0	0.468487	0	0.194831	0	344.862	337.356	315.876	318.836	312.909	249.832	243.383	243.902	223.818	194.919	222.412	224.058	231.748	208.616	191.731	199.329	183.314	189.015	193.065	199.894	182.542	778.315	127.675	213.621	218.418	194.009
4.49_435.5763m/z	435.576	4.48643	0	0	0	0	0	0	0	0	0	0	0	0	0	0	0	0.342697	0	0	0	0	0	94.4114	94.2536	99.0354	97.7551	83.4688	78.4761	84.7595	72.3919	71.2471	68.3892	72.0938	65.5771	71.7052	49.5223	54.7741	45.8312	67.7304	60.5638	53.3406	62.6016	51.142	140.726	42.9226	55.9992	81.0315	7.08528
0.94_335.0966m/z	335.097	0.938233	0	0	0	0	0	0	0	0.384369	0	0	0	0	0	0	0	0	0	0	0	0	0	70.5397	73.4899	79.947	68.8446	74.8038	70.4136	63.4145	60.686	51.4148	55.1119	57.2831	48.844	49.8789	58.3138	56.8889	44.849	48.0225	49.6059	45.0849	50.155	58.7242	80.9997	38.8143	65.6174	79.7832	40.6646
1.01_267.1084m/z	267.108	1.01388	0.00866032	0	0.00123233	4.46098e-07	0.111774	0.075327	0	0	0	0	0	0	0	0	0.13554	0	0	0.0648729	0	0	0.143127	150.873	146.985	162.111	155.136	145.621	125.359	131.372	118.608	115.702	108.685	107.577	79.4299	77.6826	64.6903	65.4207	62.5993	68.7338	73.9512	71.0201	67.9774	69.8631	233.175	68.3678	110.533	214.704	102.629
0.81_404.0946m/z	404.095	0.80515	0	0.0760193	0	0	0	0	0	0	0	0	0	0	0	0	0	0	0	0	0	0	0	21.476	23.5336	19.9282	14.0709	21.1009	19.9222	18.9105	15.7718	15.4947	14.8461	12.8013	13.9692	7.96844	10.8005	8.46977	9.01616	6.15152	10.1619	8.50722	6.66452	6.11141	40.5913	6.99732	14.9206	33.9758	27.4124
3.61_686.6757m/z	686.676	3.6101	0	0.0912921	0	0	0	0	0	0.0276467	0	0	0	0	0	0	0	0	0	0	0	0	0	29.7038	23.8157	29.663	28.1569	27.3157	37.7221	27.8095	14.2284	26.9464	23.7116	29.4347	20.8233	6.21129	25.7489	10.2915	11.9565	22.3542	12.0083	15.1428	14.6201	19.7358	63.3078	7.67154	9.06869	11.6048	11.9339
2.76_413.1241m/z	413.124	2.75548	0	0	0.126958	0	0.221006	0	0.217957	0.282304	0	0.834254	0	0	0	0	0	0	0	0	0	0	0	442.195	434.536	442.36	437.551	424.989	391.392	384.288	363.915	378.809	300.724	314.839	237.5	190.835	189.04	190.715	171.603	161.264	155.892	180.063	197.63	159.321	1049.2	215.131	189.83	730.64	253.132
1.01_512.1957m/z	512.196	1.01388	0.355607	0.820174	0.154096	0	0	0	0	0	0	0	0.199201	0	0	0	0	0.766388	0	0	0	0.258149	0.356302	603.905	579.743	597.381	609.527	600.067	508.698	508.807	467.105	454.834	437.007	432.807	315.401	285.931	271.797	282.716	254.607	252.973	261.282	260.846	232.892	254.907	340.032	572.617	649.737	474.456	229.19
2.73_603.8751m/z	603.875	2.72847	0	0	0	0	0.0597333	0	0.777436	0	0.200318	0.708984	0	0.0613453	0.359863	0	0	0	0	0.19873	0	0	0	600.657	535.557	557.95	596.579	552.739	522.264	477.962	457.918	515.687	375.478	432.67	329.921	310.432	290.899	303.28	287.115	283.056	256.154	310.526	350.077	277.622	2134.63	151.819	341.336	760.531	373.271
3.16_272.0227m/z	272.023	3.15677	0	0	0	0.0338336	0	0	0	0	0	0	0	0	0	0	0	0	0.0176766	0	0	0	0	20.3832	15.6408	22.4575	22.3951	20.3504	13.1571	13.124	16.5213	17.2704	7.3537	9.45585	3.48397	3.00863	5.99507	10.638	5.74349	1.82926	2.30766	5.96511	5.5984	5.21702	45.013	0.712541	19.4652	27.8396	14.6096
4.38_362.2173m/z	362.217	4.38037	0.423658	0	0	0	0	0.386642	0	0	0	0	0.228989	0	0	0	0	0.585931	0	0	0	0	0	407.121	410.758	400.194	398.118	392.204	337.812	341.181	305.951	332.49	286.568	283.408	264.275	296.56	278.406	258.288	247.669	231.802	230.429	235.517	265.301	245.667	584.502	80.321	235.042	779.604	312.938
0.92_781.1560m/z	781.156	0.922017	0	0	0	0	0	0	0	0.244202	0	0	0	0	0	0	0	0	0	0	0	0	0	53.5083	51.0031	42.4257	54.9494	63.2547	40.3028	36.9885	26.136	24.2533	29.2689	42.3047	30.9122	23.7456	27.4556	24.2467	21.3159	17.5626	18.7677	20.3949	24.7867	23.299	42.5044	7.71706	73.7431	48.2048	13.5759
3.49_465.1454m/z	465.145	3.49322	0	0.390638	0	0	0	0	0	0	0	0	0	0	0	0.0841332	0	0	0.0547426	0	0	0	0.122438	174.544	173.22	172.385	195.207	184.42	142.253	134.784	120.041	132.361	105.705	119.513	88.4082	108.612	128.515	90.6098	101.841	82.8944	93.5758	79.3745	108.507	91.7404	399.954	52.9137	87.8043	346.804	117.179
2.81_334.1863m/z	334.186	2.80953	0	0	0	0	0	0	0	0	0.210528	0.160364	0	0	0.343811	0	0.231415	0	0	0	0	0	0.316071	387.997	359.305	364.141	372.692	353.232	275.117	293.346	263.257	269.806	236.951	243.051	183.704	206.777	179.236	169.718	149.806	149.803	151.249	156.377	195.309	153.744	771.732	143.622	197.974	761.029	141.785
0.92_288.1182m/z	288.118	0.922017	0	0	0.244904	0.312103	0	0	0	0	0	0	0	0.0966339	0	0	0.263281	0	0	0	0	0	0	194.839	202.01	208.258	201.31	199.408	175.105	158.704	137.032	138.737	131.007	132.846	110.651	103.109	98.1289	98.4838	90.9977	93.234	95.5657	98.0532	96.3685	93.0845	294.787	179.178	112.439	230.586	142.021
1.36_385.1292m/z	385.129	1.36113	0	0	0	0	0	0	0.481079	0	0	0	0	0	0	0	0	0	0	0	0	0	0	122.855	116.406	122.388	116.951	108.89	94.1013	98.9759	90.3842	99.4025	75.8584	76.5373	54.7995	40.4551	43.7548	44.6319	45.2332	44.3684	48.5681	49.6052	41.3436	45.0365	344.614	37.6689	115.508	91.5614	128.298
4.31_348.2372m/z	348.237	4.31012	0.265244	0	0	0	0	0.527289	0	0	0	0	0	0	0	0.22846	0.33876	0	0	0.167038	0	0	0	277.701	318.262	280.409	292.419	282.691	289.687	265.075	256.772	261.646	216.967	235.206	238.471	241.77	235.488	236.08	222.265	212.636	194.594	209.111	220.252	191.352	1031.3	64.6753	190.786	549.438	208.674
0.96_602.2404m/z	602.24	0.95985	0	0	0.58429	0	0.578552	0	0	0	0	0	0	0	0	0	0	0	0	0	0	0	0	262.294	237.134	222.443	217.902	215.145	263.106	254.846	239.211	229.06	219.734	219.503	158.16	89.0591	130.355	144.933	115.817	118.423	136.852	111.97	121.738	117.522	164.145	141.471	194.628	215.411	95.5452
5.82_302.2328m/z	302.233	5.82338	0.724605	0.000114522	0.00317234	0	0	0	0	0.0157743	0.594563	0.929526	0	0.0564326	0.607809	0.539518	0.506539	0.479676	1.13388	0	0.0034669	0.887036	0.256701	1266.73	1266.56	1241.3	1244.06	1228.12	919.538	951.39	901.854	990.129	976.844	1033.59	999.861	1029.01	1022.15	977.159	882.269	867.4	875.544	934.232	980.099	934.088	1481	404.465	409.996	1411.7	568.327
2.92_762.0012m/z	762.001	2.9156	1.21222	0.927123	0	0	0.10187	0	0	0.338074	0	0	0	0	0	0	0	0	0.00213716	0	0	0	0	525.232	535.928	523.16	537.311	512.234	476.489	476.244	454.824	420.657	434.333	418.112	310.993	290.338	277.057	292.956	289.899	242.055	268.745	255.541	289.382	267.919	1254.65	184.791	284.174	869.968	320.867
0.99_538.2246m/z	538.225	0.992283	0	0	0.536987	0	0	0	0	0	0	0	0	0	0	0	0	0	0	0	0	0	0	135.678	146.652	137.737	142.462	144.939	129.158	130.45	115.649	114.796	113.16	104.812	81.9942	53.8897	49.9878	57.5994	51.7494	46.6594	40.0244	48.3561	49.3833	51.7675	321.641	49.5803	109.784	231.668	132.9
0.83_427.0753m/z	427.075	0.832167	0	0	0	0	0	0	0	0	0	0	0	0	0	0	0	0.112689	0	0	0	0	0	24.0118	21.1951	16.3393	17.0952	23.8773	23.6017	11.6358	15.4966	14.8066	14.4532	17.2302	13.4338	18.8782	12.7229	13.6093	7.69982	8.13641	6.79849	9.33761	9.43942	10.5342	30.2901	9.07977	8.75155	10.8517	2.74074
1.10_209.0563m/z	209.056	1.10375	1.55637	1.08781	1.36484	1.44331	1.63789	0.500744	1.21876	0	0.882579	1.3989	0.718413	0.342957	0.847743	0.169315	0.332687	0.322174	0.423415	0.240208	0	0	0.602377	3551.35	3345.47	3256.82	3218.81	3235.24	2630.52	2522.04	2366.5	2360.8	2151.01	2205.52	1886.28	1658.65	1868.31	1950	1740.73	1818.89	1808.37	1949.16	1756.67	1889.36	4848.29	1657.88	2449.01	4253.07	2354.48
1.68_549.1952m/z	549.195	1.67595	0	0	0	0	0	0	0	0.0684385	0	0	0	0	0	0	0	0	0	0	0	0	0	25.3571	19.6148	20.535	21.2163	17.4763	10.4695	15.1264	14.4909	11.2905	7.97622	10.5428	4.62398	2.35461	4.85453	7.32072	4.448	1.20934	4.72724	1.29022	5.2023	4.16756	54.5372	4.13751	8.34779	29.3999	19.1158
2.56_522.4902m/z	522.49	2.55755	0.48629	0.338221	0	0	0.0109759	0.349274	0	0	0.131516	0	0	0.61972	0	0	0	0	0	0	0	0	0	421.181	412.804	421.996	404.788	398.791	392.401	347.033	360.13	320.746	296.609	313.71	253.987	219.017	225.386	226.136	173.014	201.231	218.857	205.83	203.661	194.282	1486.18	131.662	236.205	627.191	281.826
0.84_331.1465m/z	331.146	0.842967	0	0	0	0	0	0	0	0	0	0	0	0.190796	0	0	0	0	0	0	0	0	0	51.2711	52.6297	53.1846	39.781	51.649	37.8094	39.83	40.1094	40.8132	28.8556	33.6565	23.0555	17.1112	18.063	22.2109	21.6625	19.1156	18.4944	15.294	16.5916	14.1296	80.8515	35.0012	25.7196	58.3248	21.1931
1.49_259.0919m/z	259.092	1.49422	0	0.0215234	0	0	0	0	0.446293	0	0.25692	0.0356594	0.274246	0.134517	0.454191	0	0	0	0	0	0	0	0	303.338	297.505	322.858	311.537	300.321	296.99	277.792	279.405	285.122	249.65	259.768	201.014	136.604	161.036	177.221	157.342	163.409	172.045	174.109	160.509	167.003	705.391	121.409	201.132	423.198	222.431
3.18_553.4770m/z	553.477	3.1838	0	0	0	0.126863	0.17934	0	0	0	0	0.123474	0.858917	0	0	0	0	0	0	0	0	0	0	255.372	269.312	244.01	267.293	267.995	217.224	201.58	218.788	195.818	190.031	217.768	166.376	168.295	143.037	153.687	135.387	147.101	142.386	149.838	140.836	147.543	631.885	119.416	86.4118	315.358	112.388
0.96_821.3074m/z	821.307	0.95985	0	0	0	0	0	0	0	0	0	0.495544	0	0	0	0	0	0	0	0	0	0	0	116.677	116.301	105.925	112.125	105.674	115.634	109.407	99.1475	90.4418	86.4644	93.5639	51.2213	24.9031	50.5506	50.2721	41.3228	40.9896	38.6108	32.1595	38.2165	45.1867	159.539	74.5327	91.522	155.316	77.8253
1.21_347.9788m/z	347.979	1.21183	0	0	0	0	0	0	0	0	0	0	0	0	0	0	0	0	0	0	0.104339	0	0	35.1707	36.7826	29.8497	35.2738	28.508	21.8259	21.7152	17.2063	16.5904	14.8399	14.0007	7.38597	4.65687	11.1236	9.38782	7.57921	9.82205	7.98867	8.577	6.05385	7.66555	28.2183	4.31626	13.0122	29.5663	9.4978
4.70_379.2113m/z	379.211	4.69518	0.557693	0	0	1.65025	0.97282	1.23915	0.307943	0	0.644865	0	0.604523	0	0	0.0416115	0.0173041	0	0	0	0	0.0950478	0	1025.19	1010.48	1002.8	1007.17	989.503	912.774	925.395	890.039	939.213	778.514	856.092	778.926	804.526	756.208	750.703	673.218	653.106	670.201	658.655	736.209	623.625	1314.94	340.425	739.166	1205.02	862.147
0.85_343.0297m/z	343.03	0.853783	0	0	0	0	0	0.0165739	0	0.0211745	0	0	0	0	0	0.048979	0.360199	0	0	0	0	0	0	97.523	95.4798	102.349	85.9809	83.0016	63.004	77.1881	67.7045	61.5921	57.9667	69.0628	37.2885	38.785	44.7074	29.1116	28.9459	28.3768	29.5439	36.006	28.7603	36.5687	111.927	33.4107	74.7172	95.1793	50.8525
1.50_276.1447m/z	276.145	1.49963	0.380527	0.330475	0.729068	0	0.0713197	0.423033	0	0.415698	0	0.804621	0	0	0.409858	0.15081	4.12526e-08	0	0	0.0588481	0.639389	0.421349	0	868.933	857.861	868.052	865.983	884.826	897.404	872.298	827.562	825.979	752.149	742.588	611.831	446.28	474.165	511.426	475.655	476.458	499.449	503.707	472.998	483.169	1221.72	428.8	567.074	1563.33	787.45
0.84_347.1398m/z	347.14	0.837567	0	0	0.611464	0.0977779	0	0.415375	0	0	0	0	0	0.082867	0	0	0	0	0	0	0	0	0	267.011	267.285	262.683	255.55	254.81	221.391	205.54	192.901	203.22	178.97	175.855	142.831	140.463	116.988	105.245	106.675	91.9433	107.59	98.862	94.4026	111.562	496.459	133.525	160.575	370.793	133.134
5.48_195.6359m/z	195.636	5.47613	0	0	0	0.300308	0.0740387	0.0015937	0	0.0108606	0	0.204842	0	0	0.0732209	0	0.00650578	0	0	0.108331	0	0.00270958	0	121.364	138.649	116.764	123.247	117.432	101.342	97.8711	86.1574	97.6547	88.5264	104.007	102.483	114	103.654	96.8153	94.2564	94.4795	87.0591	97.2447	108.996	99.8261	211.461	22.0243	32.5837	125.477	67.0391
0.84_189.1606m/z	189.161	0.842967	0.00128339	0.140825	0	0.659971	0.111906	0.177353	0.123649	0.111931	0.422217	0.255348	0.459433	0	0	0	0.204604	0.905399	0	0.372604	0.157961	0	0	866.691	825.817	859.738	839.26	829.628	654.099	706.445	616.861	646.309	589.163	577.555	449.906	393.819	361.311	351.594	317.893	313.956	332.178	329.808	301.257	344.285	1358.31	550.971	469.902	995.823	670.001
0.89_495.9221m/z	495.922	0.891617	0	0.210945	0	0	0	0	0	0	0	0	0	0	0	0	0	0	0	0	0	0	0	46.6715	54.6851	53.1767	58.4975	47.5747	34.3461	34.9568	37.0555	31.8546	27.8682	32.9294	21.576	18.3885	31.7353	19.1324	12.6045	19.9638	20.3664	22.2543	10.8347	28.0232	59.8638	12.775	37.4869	69.5578	39.3323
0.93_585.1038m/z	585.104	0.927433	0	0	0	0	0	0	0	0.0898767	0	0	0	0	0	0	0	0	0	0	0	0	0	24.1953	23.7279	25.764	30.8038	26.2649	11.4083	10.3839	14.7219	10.1835	4.58258	14.6489	7.74261	13.4938	8.13922	10.5076	5.28109	8.22395	7.16257	8.14102	10.1044	14.5766	27.7105	4.50733	32.3293	28.6504	6.2325
0.84_483.0629m/z	483.063	0.837567	0.15974	0	0	0	0	0	0	0	0	0	0	0	0	0	0	0	0	0	0	0	0	42.4152	35.2817	41.4546	32.2496	35.6544	23.0762	23.1848	30.3328	33.2007	20.9247	30.6022	14.0903	11.6195	12.4586	12.4776	14.0083	12.9105	14.3886	13.3316	9.16371	9.91302	88.8645	27.3909	16.3583	44.8442	16.9832
5.56_300.2174m/z	300.217	5.5606	2.65578	3.51354	1.21417	2.672	0.266869	1.76347	2.9616	0.781689	2.4249	0.938107	0.985992	0.196481	0.815582	0	2.32396	2.6145	0.311022	1.35251	0.268677	0.480941	0.350274	3911.52	3969.36	3864.01	3889.16	3913.75	3733.62	3509.94	3501.53	3715.98	3605.42	3993.43	3799.27	3398.71	3399.77	3330.21	3155.44	3130	2831.82	3299.88	3326.76	2938.17	3824.2	1809.54	1632.92	5596.22	2680.68
5.13_346.2216m/z	346.222	5.1289	5.607	3.17196	2.21896	1.2143	1.37038	0.167271	1.44258	1.03539	2.84654	1.47839	0.604745	1.35786	1.80039	0.0741036	4.6504	1.88852	1.23497	0.42438	0	0.0237901	1.28833	5800.26	5659.67	5656.8	5574.84	5490.03	4557.05	4418.51	4298.51	4410.31	3954.93	4428.52	4397.81	4941.84	4805.35	4351.19	4210.79	4110.78	4053.66	4211.51	4710.44	4083.13	11980.2	1571.3	3558.85	9244.66	5495.35
0.94_277.1400m/z	277.14	0.943633	0	0	0	0	0	0	0	0.167404	0	0	0.0327204	0	0	0	0	0	0	0	0.165205	0	0	71.5953	67.4242	71.6237	63.0605	66.3957	62.8856	48.1619	54.8263	47.3441	43.9817	48.0376	39.4121	30.1326	39.511	37.6364	33.5199	34.4699	31.5712	27.2638	35.5253	36.9863	109.874	55.9944	68.1588	69.0494	47.1348
2.74_311.1245m/z	311.124	2.73927	0	0	0	0	0.295342	0	0	0	0	0	0.27742	0	0.235601	0	0	0	0	0	0.428607	0	0	233.349	228.282	231.685	239.859	235.716	229.166	219.981	219.442	212.356	181.065	192.537	153.077	121.417	117.087	123.805	129.359	111.795	105.433	122.555	136.739	116.965	309.327	47.2457	183.053	178.136	143.013
1.25_543.1066m/z	543.107	1.24967	0	0	0	0	0	0	0	0	0	0	0	0	0	0	0	0.225165	0.285553	0	0	0	0	142.313	139.15	131.304	148.397	131.716	95.7579	114.367	99.8602	94.5874	85.932	92.1479	56.0864	48.3727	53.6458	60.6324	47.5898	50.3619	52.5973	65.4143	48.2793	60.5597	387.396	41.7575	97.8447	218.567	91.7127
0.92_307.0440m/z	307.044	0.922017	0	0.0500091	0	0	0	0	0	0	0	0.112375	0	0	0	0	0	0	0	0	0	0	0	35.1865	32.0285	28.4787	25.7155	25.094	28.277	18.3655	13.7145	14.8501	11.9193	16.4839	16.5318	13.7581	14.5804	16.6846	15.5245	10.7147	11.4254	11.3504	15.0201	15.8685	61.1646	20.4061	27.0083	39.5051	22.5863
0.86_546.8251m/z	546.825	0.859183	0.378296	0	0.104233	0	0	0	0	0	0	0	0	0	0	0	0	0	0	0	0	0	0	97.3423	92.9086	102.53	88.2153	101.204	49.5803	74.1728	59.4256	57.1182	47.525	53.3002	25.2246	25.6683	25.8999	29.6068	16.7965	21.2861	31.9668	30.2318	25.2626	34.3833	59.2881	5.66703	121.855	80.7282	55.5021
1.22_438.9802m/z	438.98	1.21723	0	0	0	0.178802	0	0.0333422	0.459	0	0	0.838815	0.535638	0	0	0	0	0	0	0	0	0.257988	0	494.705	467.473	485.395	474.114	466.414	356.758	345.26	301.133	314.825	288.198	296.349	181.282	202.753	205.641	199.224	159.856	175.551	191.671	220.735	174.449	203.592	854.951	80.6685	192.992	534.574	125.251
4.83_363.2162m/z	363.216	4.82828	0.416592	0.87336	0	0.36582	0.333649	0	0.559021	0	0	0	0.16246	0	0	0	0	0.0132964	0	0	0	0	0	436.953	408.081	403.707	416.065	418.619	397.131	358.388	360.419	339.455	332.485	331.165	350.614	360.676	346.054	339.881	302.203	308.021	291.608	283.019	324.516	290.046	811.958	140.067	278.267	487.619	401.395
1.40_240.0510m/z	240.051	1.40437	0.031958	0.0678	0	0.597137	0	0.154376	0	0	0	0.630759	0	0	0	0	0	0	0	0	0	0	0	294.544	291.912	282.126	287.223	285.144	229.42	245.536	210.957	226.885	199.839	189.648	147.963	143.182	130.806	153.306	131.232	128.687	143.729	149.344	130.922	135.737	567.539	150.711	173.284	450.931	169.311
3.95_443.1662m/z	443.166	3.95205	0	0	0.693486	0	0	0	0	0.00820247	0	0	0	0	0.400208	0	0	0	0	0	0	0	0	197.557	183.288	173.777	199.455	175.449	156.835	173.231	139.715	155.02	133.198	146.439	129.822	130.715	133.604	118.95	114.079	101.061	107.138	116.533	139.705	91.0831	416.222	60.4838	119.269	281.811	172.706
1.14_446.0264m/z	446.026	1.14158	0.241708	0	0	0	0.0765369	0	0	0	0	0	0	0	0	0	0	0	0	0	0	0.0625353	0	62.4432	84.9441	71.2367	75.0631	78.1468	86.7364	76.8203	64.9054	60.2454	66.7921	68.1666	34.4331	29.6232	39.4074	44.4481	43.2037	31.8802	35.5803	36.771	34.6863	42.2595	132.576	16.3609	46.1893	93.9728	45.3393
0.97_191.1031m/z	191.103	0.96525	0.0169132	0	0	0.0944974	0.117699	0	0	0	0	0	0	0	0.00677235	0.265869	0.105591	0	0.112941	0	0.00650213	0	0.419617	181.944	170.381	169.864	171.528	175.312	196.406	177.626	176.724	175.7	162.994	168.975	124.637	94.5736	98.6837	107.85	95.7267	96.5078	99.4418	97.0134	89.2908	96.3242	242.803	91.0213	165.506	268.942	185.597
3.98_324.1381m/z	324.138	3.97907	1.92235	1.68095	1.86662	0.428955	1.48831	1.54935	1.47225	1.03587	0	1.90307	0.629007	1.13449	1.37306	0.460037	0.251953	0.367203	1.16089	0	0.276261	0	0	3092.51	3105.63	3065.33	3072.94	3019.35	2553.6	2560.53	2390.71	2573.22	2136.53	2142.88	2028.95	1985.03	1838.91	1825.13	1701.69	1595.4	1628.95	1690.88	1782.47	1564.62	757.803	52.9003	155.569	351.738	12004.7
1.57_314.0921m/z	314.092	1.56988	0.166412	0	0	0	0	0	0	0	0	0	0	0	0	0	0	0	0	0	0.431671	0	0	110.378	105.961	115.223	119.58	111.449	82.4329	88.9921	87.6651	86.8745	82.9087	81.2983	60.1351	56.4317	51.577	56.5503	50.5516	49.5024	61.0577	48.645	53.4414	56.6743	200.557	43.9019	44.2097	93.9078	45.605
3.11_296.1497m/z	296.15	3.11353	0	0	0.414581	0.448242	0.177139	0	0	0	0	0.214386	0.0380609	0	0.00140212	0.252982	0	0.445792	0.0791473	0	0.000226276	0	0	358.713	353.086	352.542	358.978	351.966	313.148	327.409	302.897	326	265.665	272.179	225.328	217.083	187.818	197.819	192.585	172.611	170.187	191.6	202.598	182.492	2752.43	221.388	121.193	1474.72	111.776
2.76_440.2134m/z	440.213	2.76088	0	0	0	0	0	0.504379	0	0.600647	0.0516435	0	0	0	0	0	0	0	0	0	0	0	0	237.698	227.22	230.886	235.675	219.055	199.315	211.042	199.15	194.448	148.78	172.813	122.283	125.847	110.881	113.181	105.456	91.5803	90.0556	108.354	115.107	107.089	527.525	23.2658	226.823	325.772	188.14
1.00_428.1762m/z	428.176	0.997683	0.141963	0	0	0	0	0	0	0	0	0	0	0	0	0	0.622178	0	0.380476	0.000273559	0.00833153	0	0	200.984	207.703	210.027	190.562	206.231	209.277	194.48	167.245	177.959	155.603	166.261	121.851	94.1727	99.6853	91.4407	89.3648	95.6773	83.4361	79.0439	92.4061	82.4655	350.765	111.25	161.953	267.397	169.069
0.84_771.0999m/z	771.1	0.842967	0	0.00926611	0	0	0	0	0	0	0	0	0.077702	0	0	0	0	0	0	0	0	0	0	20.7843	16.5039	17.054	21.6075	17.7944	16.6546	13.039	10.0603	13.47	12.3526	17.691	4.61037	7.06682	3.82587	6.74709	4.41547	3.43626	5.72621	7.06377	3.07402	5.95809	40.6715	7.8811	13.4431	42.1511	10.4238
0.84_509.1933m/z	509.193	0.837567	0	0	0.256638	0	0	0	0	0.986267	0	0	0	0	0	0	0	0	0	0	0	0.577087	0	403.975	402.617	399.588	383.29	401.442	325.101	313.138	293.901	293.424	266.252	272.107	205.205	193.36	152.632	154.544	144.773	143.219	147.913	131.434	128.958	159.132	663.303	171.906	268.084	493.247	191.548
0.80_366.6033m/z	366.603	0.799733	0	0	0	0	0	0	0	0	0	0	0	0.276295	0	0	0	0	0	0	0	0	0	38.5095	31.9044	39.6454	38.4641	38.7809	37.759	40.8563	36.6503	33.0352	37.4754	34.6832	27.5651	23.1496	20.6692	27.3068	30.2619	30.5282	23.8928	29.0128	23.149	23.6475	85.1817	28.1297	23.4403	83.4335	35.0734
0.90_528.0787m/z	528.079	0.897017	0	0	0.0346576	0.3203	0.290571	0	0.342602	0	0	0	0	0	0	0	0.00255424	0	0	0	0	0	0	223.546	210.127	206.218	197.345	197.97	156.137	101.957	99.9997	99.6044	85.9137	107.899	106.662	101.428	117.114	107.834	95.9558	103.307	118.032	87.2049	100.214	105.793	113.276	172.405	159.43	75.2783	44.2374
0.90_955.0146m/z	955.015	0.897017	0	0	0	0	0	0.251095	0	0	0	0	0	0	0	0	0.175732	0	0	0	0	0	0.0142004	115.469	89.6059	103.285	118.157	107.503	106.891	69.9449	53.008	58.7038	48.3691	48.8716	40.4439	50.1652	49.0273	33.6308	26.0115	33.6881	51.0776	50.3912	38.5076	44.3745	83.6273	21.9084	62.2698	133.682	22.1195
2.29_546.5842m/z	546.584	2.29137	0.0761142	0	0	0	0.357697	0	0	0	0	0	0	0	0	0	0	0	0	0	0	0	0	86.4386	76.2273	81.3966	92.2702	87.3496	56.8459	73.4231	71.8897	63.8368	62.5443	55.1348	37.0103	35.9792	37.4079	39.3637	31.0517	33.6206	36.2713	44.7044	33.2593	38.3459	288.162	34.0684	65.3354	131.33	94.4114
3.99_287.0635m/z	287.064	3.98987	0.0218943	0.563757	0	0	0	0	0	0	0.0284364	0.640823	0.00904201	0	0	0	0.151672	0	0.100795	0	0	0	0	351.774	254.483	217.382	224.963	201.815	191.353	226.831	154.743	170.839	144.206	145.96	155.005	254.148	171.324	213.685	189.319	171	146.098	149.146	206.506	145.239	768.875	52.9095	151.338	131.248	209.476
4.12_333.1099m/z	333.11	4.11757	0.00921937	0	0.482733	0	0	0.0334864	0	0	0.331085	0.131683	0	0	0	0	0	0	0	0	0	0.00573182	0	154.804	161.18	167.061	158.77	171.579	140.952	124.597	138.691	128.046	106.592	116.829	119.245	104.389	117.279	105.387	98.3827	96.6027	95.0394	108.571	104.3	96.7786	172.191	50.1208	21.5658	192.767	193.202
2.94_513.4910m/z	513.491	2.93722	0	0	0	0	0.539852	0	0	0	0.337668	1.00085	0	0	0	0	0	0.118988	0	0	0	0	0	302.483	315.323	327.202	334.442	328.009	269.051	282.718	273.244	275.244	241.224	233.673	179.898	176.861	156.702	175.423	166.093	153.952	152.157	169.395	162.009	162.295	825.193	100.891	186.996	495.729	195.356
3.24_247.1292m/z	247.129	3.24123	0.0276814	0.716095	0	0.439453	0.357201	0.518585	0.679531	0.225104	0	0	0.00743194	0	0.118679	0	0	0	0	0	0	0	0	419.472	424.005	412.726	411.781	396.602	396.331	372.032	363.018	379.59	309.9	334.119	283.477	250.829	256.023	273.19	264.49	249.102	241.085	255.505	299.749	262.199	883.338	190.408	272.896	554.013	276.285
2.72_751.0881m/z	751.088	2.71765	0	0	0.946869	0	0.740327	0	0.0057735	0	0	0.043846	0	0	0	0	0	0	0	0	0	0	0	290.979	289.161	283.938	265.399	257.568	243.65	238.078	226.105	240.201	185.841	185.333	152.845	134.489	118.537	153.902	145.093	125.747	140.32	130.978	144.03	126.72	997.234	85.2013	130.353	373.693	163.786
2.71_601.0717m/z	601.072	2.71225	0.692017	0	0	0.670074	0	0	0	0.214325	0	0.696533	0	0	0	0	0	0	0.00616128	0	0	0	0	365.149	339.691	362.793	339.735	332.01	323.379	296.02	308.658	295.857	255.468	254.035	204.472	198.343	175.642	181.986	170.139	180.515	153.418	190.482	207.801	168.795	1171.37	93.5425	176.64	465.777	214.113
1.03_675.2452m/z	675.245	1.0301	2.05295	1.75907	1.44182	0.864349	0	0	1.64044	1.06204	0	0	1.11146	0.681048	0	0.750977	2.61133	0	0	0	0.5336	0.0209724	0	3030.13	2879.98	2949.54	2817.13	2927.29	2219.13	2297.81	2122.22	2115.38	1912.3	1966.6	1350.32	1243.76	1250.94	1229.37	1101.69	1134.07	1138.06	1187.28	1108.39	1143.54	4802.37	1303.68	2152.51	5437.96	2207.23
2.72_751.0067m/z	751.007	2.72307	0.227295	0.0689567	0.102918	0	1.9335	0	0	0.688817	0	0.0688066	0	0.455719	0	0.38385	0	0	0	1.07557	0	0.815369	0	1007.55	968.999	995.941	972.749	972.216	872.375	835.66	852.243	805.174	727.93	700.072	570.06	508.73	487.534	535.45	507.397	459.399	468.319	524.494	563.234	489.598	2746.86	277.107	321.786	841.367	778.935
2.44_568.0138m/z	568.014	2.43527	0	0	0.175894	0.0198713	0	0	0	0	0	0.318748	0	0	0	0	0	0	0	0	0	0	0	101.401	102.394	108.594	96.9773	100.406	92.8397	72.4256	77.5505	85.5761	57.961	83.4487	51.5771	46.8825	43.165	45.7657	38.3733	29.7367	38.8354	39.3403	29.1752	39.742	368.718	24.7351	21.0159	156.596	65.8789
1.66_268.1045m/z	268.105	1.65973	0.0430963	0	0	0.482475	0.468959	0	0.229492	0	0	0	0	0	0	0	0	0	0	0	0.849701	0	0	324.91	303.409	296.736	313.57	307.98	289.997	275.657	275.895	275.219	243.337	253.321	207.574	144.878	179.301	177.552	171.05	175.42	180.61	173.802	172.336	170.735	517.815	21.0551	140.53	249.453	302.874
0.93_707.2202m/z	707.22	0.927433	0	0	0.815479	1.33031	1.65253	0	1.0469	0.920593	0.789246	0	0.796844	0	0	0	0	0	0	0	0	0	0	712.521	662.508	679.677	677.399	653.27	597.631	542.562	515.99	508.61	460.57	472.985	387.834	308.327	323.082	332.485	312.672	302.583	306.117	290.391	290	322.691	496.327	846.408	700.004	364.161	241.743
0.90_1024.0668m/z	1024.07	0.897017	0	0	0	0	0	0	0	0	0	0	0	0	0	0	0.377502	0	0	0	0	0	0	76.1287	87.4529	90.7238	80.2062	89.4732	71.5971	45.8254	52.6998	42.2135	36.8579	42.407	27.5366	33.426	52.3436	37.8911	16.4199	27.2149	41.8518	32.2647	33.6691	37.7472	115.591	16.6548	52.5201	103.378	18.427
4.71_285.1852m/z	285.185	4.706	0.803168	0.151377	0.741608	0.80334	1.11757	0.441194	0.649817	0.538036	0.577855	0.857774	0.585845	1.38329	1.31685	0.151398	0.962805	1.19104	0	0.0309867	0.456065	0.373444	0.194585	1720.17	1742.53	1668.43	1765.21	1678.6	1584.75	1575.37	1449.51	1479.37	1348.96	1418.09	1347.38	1482.3	1367.31	1278.43	1207.3	1175.54	1205.43	1165.68	1378.09	1156.74	1279.77	319.927	1435.72	2446.78	2730.07
3.23_330.0829m/z	330.083	3.23042	0	0	0.163025	0	0	0.443527	0	0	0	0	0	0	0	0	0	0	0	0	0	0	0	96.2587	106.087	93.5341	93.4434	89.1164	92.9814	82.4929	84.3144	78.3082	72.5075	78.7566	61.8699	42.9797	55.3151	60.7031	50.5799	44.0059	41.9959	47.7802	57.5864	50.8224	281.598	54.4664	71.6831	112.836	83.1281
4.10_248.0928m/z	248.093	4.10135	0.319959	0.828409	0.372353	0.496884	0	0.412176	0.674423	0.186229	0	0.527815	0	0.686418	0.625409	0	0.880136	1.51763	0.524023	0.759118	0	0	0.00340618	1216.01	1197.3	1191.62	1177.98	1193.6	1021.17	959.285	948.272	972.691	819.438	882.427	870.619	945.293	963.433	944.818	861.45	846.618	842.078	865.285	943.413	835.131	5265.14	278.23	625.498	810.446	744.484
0.86_662.7556m/z	662.756	0.864583	0	0	0	0	0	0	0.607422	0	0	0	0	0	0	0	0	0	0	0	0	0	0	107.957	104.696	108.821	95.2784	107.346	79.9975	89.573	84.2714	78.5511	60.4729	65.5718	40.1235	42.7207	45.8018	48.7215	38.4976	43.3588	44.3164	41.5667	38.4543	47.688	106.836	13.6274	141.078	127.638	78.6457
0.97_402.1625m/z	402.163	0.970667	0	0	0	0.1185	0.364182	0	0	0	0	0	0	0	0	0	0	0	0	0	0	0	0	96.2363	87.0627	78.4432	63.5747	76.5487	68.1221	64.2839	64.1637	60.6416	57.3432	61.0637	28.5622	26.7477	24.6354	25.1727	21.333	28.8152	22.9181	23.5223	28.0993	24.9526	155.077	34.7417	51.619	145.574	36.4488
1.01_300.1194m/z	300.119	1.00848	0.534901	0	0.0293249	0	0	0	0	0	0	0.469238	0	0	0	0	0	0.363342	0	0.0114647	0	0	0	237.153	230.826	232.052	222.287	230.796	195.359	210.19	175.435	182.03	160.72	169.202	116.361	105.998	94.9113	101.149	90.0447	90.2277	101.228	92.5306	92.3407	83.1128	415.127	113.679	151.054	374.427	149.189
4.11_287.1007m/z	287.101	4.10675	0.371034	0.585433	0.254408	0.462369	0.245316	0.627655	0.575348	0.162728	0.593691	1.05119	0	0	0.0910154	0	0.949768	0.772865	0	0	0.556808	0	0	1247.66	1193.93	1149.7	1131.61	1115.71	960.637	938.666	849.278	833.785	749.571	784.032	804.957	905.517	804.774	718.095	741.106	669.053	705.905	714.626	736.112	668.1	3154.78	326.618	709.302	691.133	726.251
0.86_332.8428m/z	332.843	0.859183	0	0	0	0	0	0	0	0	0.304544	0	0	0	0	0	0	0	0	0	0	0	0	65.8035	58.5029	58.4472	54.957	60.0076	48.9985	47.6103	32.6292	38.0623	36.3908	38.7242	26.3329	18.1684	25.1867	25.7015	11.4664	20.3831	22.9878	21.1281	20.0663	24.4659	38.0624	2.83413	27.1445	51.0916	5.31921
1.01_229.1190m/z	229.119	1.00848	11.8755	10.7281	9.63236	9.61505	8.69863	9.03845	9.97437	5.84552	7.60962	6.99672	7.11476	5.14144	3.17215	2.74109	2.49895	2.96843	3.6947	3.03998	2.20959	3.579	1.55856	19792.5	19564.9	19980.9	19827.5	19983	17677.9	18161.1	15842.4	16632.1	14965.5	14915.1	11294.4	9593.62	8628.15	8576.39	7961.43	8140.56	8421.45	8426.09	8267.23	8430.63	49874.3	7462.53	13964.6	34856.3	13303.8
0.89_658.9355m/z	658.936	0.891617	0	0	0	0	0	0	0	0.376221	0.058053	0	0	0	0	0	0	0	0	0	0	0	0	78.8049	89.6757	83.8327	90.2579	91.4637	46.1321	61.4168	50.9829	46.4641	43.2022	39.0183	37.4156	37.6901	48.0428	34.347	31.8391	29.7211	36.0111	29.9206	35.0479	38.303	76.4453	9.3201	33.3177	60.507	20.5402
2.57_540.5002m/z	540.5	2.56835	0.177826	0	0	0	0	0	0.0996967	0	0	0	0	0	0	0	0	0.548676	0	0	0	0	0	150.239	127.302	128.193	122.311	120.811	124.25	126.212	119.371	113.332	116.038	97.2907	75.3395	63.3051	66.7835	71.1442	67.4318	60.0863	77.1718	58.9971	68.4028	57.9167	421.762	41.8845	73.1297	189.282	99.4474
3.45_336.1831m/z	336.183	3.44998	0	0	0	0	0	0	0	0	0	0	0	0	0	0.288437	0	0.131227	0	0	0.264862	0	0	46.7256	53.1238	49.1844	55.8536	52.3266	40.4748	49.221	32.1312	38.1469	41.4618	35.0498	28.3326	23.6574	26.4194	28.4573	22.2281	23.7224	22.2905	19.5681	24.1389	17.3043	75.473	0	8.53356	55.598	10.0764
0.81_538.1630m/z	538.163	0.80515	0	0	0	0	0	0	0	0	0	0	0	0.395264	0	0	0	0.0311271	0	0	0	0	0	49.0767	60.6939	51.6264	58.6449	51.069	64.2063	54.8907	47.2041	48.1538	47.8609	47.3284	41.5887	21.544	34.9631	37.4853	38.0683	39.1865	29.3452	24.4122	29.3072	24.5048	142.175	30.9589	41.4374	102.873	50.8136
2.65_584.5996m/z	584.6	2.65482	0	0	0.381797	0	0	0	0	0	0	0.0170639	0	0.957428	0	0	0.0848389	0	0	0	0	0	0	249.635	242.168	234.563	244.458	186.928	192.29	206.374	191.212	184.098	170.895	163.801	126.885	107.167	116.062	123.34	93.5316	93.7764	87.6129	103.092	117.43	96.2349	747.447	75.0204	153.707	456.498	133.85
0.93_348.0701m/z	348.07	0.932833	0	0	0	0.241631	0.281113	0	0.193843	0	0	0.596329	0	0.609314	0	0	0	0.513962	0	0	0	0	0	354.51	330.402	352.213	337.441	342.322	304.965	253.411	256.57	250.902	217.019	238.647	204.146	171.681	199.348	201.477	168.787	178.97	193.182	177.661	179.044	183.825	478.952	129.251	326.661	473.077	335.165
0.88_340.9327m/z	340.933	0.8808	0	0	0	0	0	0	0	0	0	0	0	0	0	0	0	0	0	0.060306	0	0	0	10.5827	10.098	11.0907	14.9055	12.7857	4.0056	5.02634	10.7076	7.37902	9.95582	8.83815	3.72231	4.28581	7.05584	1.20295	1.9877	4.3135	3.93392	2.96634	2.88479	4.46009	12.9042	1.76007	15.8736	22.4755	8.90686
3.75_338.1349m/z	338.135	3.7486	0	0	0	0.563812	0	0.213043	0	0.168747	0	0.975095	0	0	0	0.506927	0.0045245	0	0	0	0	0	0	333.129	343.512	315.003	336.113	342.38	308.626	293.407	272.621	274.058	241.813	240.432	232.344	230.915	240.179	231.093	218.754	199.477	200.01	210.651	239.932	206.796	838.974	99.3442	241.417	490.541	219.788
0.89_700.9141m/z	700.914	0.8862	0.428223	0	0	0	0	0	0	0	0	0	0	0	0	0	0	0	0	0	0	0	0	83.9599	90.0077	87.6731	93.4335	77.3359	45.6585	64.5876	58.4377	49.9476	50.7998	42.6697	28.9282	46.3848	44.4121	31.0092	23.7098	19.493	37.1167	24.84	26.7714	45.4081	99.3231	3.35536	42.4741	68.924	47.3104
0.94_332.0961m/z	332.096	0.938233	0.953644	0.327194	0	0	0	0.039234	0.223022	0	0	0.207092	0	0	0	0	0.465958	0	0	0	0	0	0	312.61	315.665	301.322	306.18	294.731	287.186	241.661	245.241	241.764	213.321	235.243	187.847	167.858	184.784	183.321	164.693	178.89	171.588	181.487	179.643	170.693	304.464	95.3982	271.692	297.345	160.686
2.93_444.0275m/z	444.028	2.9264	0	0	0	0	0	0	0	0	0	0	0	0	0	0	0	0.0775207	0	0	0	0	0	19.912	23.0457	20.3584	20.0417	13.8615	14.6047	15.2127	7.51893	16.2573	15.1118	9.18859	7.73819	3.38597	3.40196	4.79563	6.16084	2.28299	1.25951	5.62108	4.59436	1.92445	31.488	2.74883	19.6255	17.9182	19.3101
0.95_462.1828m/z	462.183	0.94905	0.646902	0	0	0	0	0	0	0	0	0	0	0	0	0	0	0	0	0	0	0	0	69.4731	63.4358	62.8875	64.5325	72.834	76.5729	66.6913	60.9073	59.5616	54.6096	53.0332	47.6622	28.4846	34.9566	43.777	36.2302	42.1819	32.7988	35.1687	34.9237	36.7721	67.6698	85.7124	25.6255	51.716	12.2948
5.12_365.2316m/z	365.232	5.1235	0	0.622491	0.627432	0.434339	0	0.195854	0.500736	0.197713	0.971326	0.506583	0	0.288649	0.450282	0.199315	0.248463	0.619724	0.0235474	0.4386	0	0.938302	0.00143228	910.876	914.577	893.206	922.848	893.24	718.798	707.139	681.144	684.707	630.849	690.302	670.027	770.198	794.029	658.186	653.92	658.988	629.797	680.135	725.109	664.268	1869.93	280.08	693.01	1224.81	902.841
1.02_415.0504m/z	415.05	1.0247	0	0	0.408318	0	0	0	0	0	0	0.0740034	0	0	0	0	0	0	0	0	0	0	0	106.019	89.3983	93.537	92.1299	93.4156	69.895	71.1973	67.5057	69.3837	54.9221	63.6625	40.1547	31.216	36.8911	43.9557	26.0171	29.4837	29.5677	31.9477	27.6757	34.0283	179.501	31.5429	100.406	150.901	57.1735
0.93_485.0597m/z	485.06	0.927433	0	0	0.373901	0.836848	0	0.00442094	0	0	0	0	0	0	0	0	0	0	0	0	0	0.0103922	0	218.037	199.94	220.667	195.561	211.321	163.182	116.175	117.894	121.864	104.111	118.114	108.901	99.8806	115.268	100.692	84.0981	89.204	98.6739	100.444	83.5027	97.245	132.774	124.198	54.3209	92.4524	53.0383
2.54_522.7408m/z	522.741	2.54133	1.28009	0.690151	0.0444073	0.666588	0	0	0	0	0	0	0.16336	0	0	0	0	0	0	0	0	0	0	416.477	381.088	398.259	400.639	405.946	387.799	356.548	326.112	344.421	306.055	309.381	244.588	212.186	200.438	208.346	190.367	186.717	249.154	227.211	205.593	174.397	1409.75	144.331	223.521	600.212	282.001
3.49_316.1756m/z	316.176	3.48782	0	0	0	0.221373	0	0	0.415909	0	0	0.292511	0.260345	0	0	0	0.482328	0	0.250657	0	0	0.264218	0	310.928	319.114	301.423	304.962	300.525	270.571	263.245	254.213	268.167	239.574	235.266	214.149	210.898	183.648	167.662	179.529	162.04	170.722	181.729	193.957	172.347	412.866	140.843	112.159	1048.97	137.197
4.90_287.2004m/z	287.2	4.90393	0.856823	0.912489	0	0.240531	0.196666	0.438126	0.0665383	0.812624	0.885848	0.542654	0	0.289809	0.254496	0.354011	0	0.725754	0.544312	0	0.509938	0.0213685	0	931.321	933.754	936.428	961.094	970.32	857.743	811.598	798.141	804.232	740.635	763.358	722.469	769.896	802.592	737.483	639.721	665.316	653.752	653.296	748.536	713.51	1239.5	300.704	872.92	1243.48	1145
0.97_515.2125m/z	515.213	0.970667	0	0	0	0	0	0	0	0	0	0	0.448881	0	0	0	0	0	0	0	0	0	0	70.0689	68.213	77.5604	63.1457	80.9114	59.7742	67.2633	60.0744	58.1833	54.888	59.1844	37.496	23.657	29.7693	37.6496	23.8513	24.8527	29.8254	29.2483	27.1936	24.06	149.914	20.8986	33.0661	129.045	36.0211
0.87_198.8696m/z	198.87	0.87	0.168629	0	0	0	0	0	0	0	0	0.357407	0	0	0	0	0	0	0	0	0	0	0	93.6499	93.2836	90.6836	93.6954	86.8455	64.1758	69.2981	61.771	60.5118	56.8898	53.9846	39.5097	43.1061	45.6074	40.7334	32.0966	37.2394	44.1401	41.7185	43.0323	41.5398	106.702	11.4711	23.7865	86.7914	28.0538
0.90_399.1428m/z	399.143	0.897017	0	0	0	0.691574	0.511171	0.175171	0	0	0.332382	0	0	0	0	0	0	0	0	0	0	0.497498	0	321.741	323.801	305.319	308.31	322.157	279.003	245.43	225.573	214.039	192.048	211.458	160.956	145.302	150.153	146.617	136.262	124.094	139.506	131.091	123.498	153.415	517.246	258.352	204.094	497.887	313.794
2.41_491.5691m/z	491.569	2.41365	0	0.370427	0	0	0	0	0	0	0	0	0	0	0	0	0	0	0	0	0	0	0	56.6772	62.7005	56.5391	64.4265	64.9763	48.4528	52.9984	41.8012	46.0649	39.1506	36.8797	33.101	21.6488	24.6395	21.4372	20.5976	19.6225	22.7488	22.1567	27.023	27.4118	221.896	13.8857	30.0215	103.793	36.2321
0.92_1032.0293m/z	1032.03	0.922017	0	0.0217655	0	0	0	0	0	0	0	0	0	0	0	0	0	0	0.2948	0	0	0	0	66.6376	66.7023	67.4638	70.2518	68.9883	40.6308	40.0809	47.7882	33.0195	27.0412	40.9764	29.0056	28.6808	24.7623	33.3539	22.04	26.1595	42.7256	29.3146	20.9264	34.5136	82.4587	10.1605	38.8054	79.0728	27.7065
2.25_247.1084m/z	247.108	2.25355	0	0.217071	0.0413509	0.102997	0	0	0.153904	0	0	0	0.530281	0	0	0.0671473	0	0.260061	0	0	0.257619	0	0	281.25	280.797	273.354	262.512	260.29	202.306	212.101	200.538	211.412	186.33	168.635	130.496	111.896	104.086	116.537	103.568	116.052	108.536	110.743	104.758	108.304	552.02	109.752	195.808	445.856	198.316
3.96_295.1294m/z	295.129	3.95745	0	0	0	0	1.07431	0.394135	0.151679	0.437769	0.416656	0	0	0	0	0	0.318939	1.24426	0	0	0	0	0	462.767	462.899	445.884	463.962	428.271	431.946	427.014	408.209	406.422	355.48	362.282	363.462	352.641	326.605	333.22	313.106	304.517	303.023	306.648	369.981	280.492	737.702	122.288	283.486	501.61	341.012
1.00_289.0964m/z	289.096	0.997683	0	0	0	0	0	0	0	0	0	0	0	0	0.447617	0	0	0	0	0	0	0	0	61.8843	58.7562	60.8844	68.2302	59.7563	58.5369	53.8248	52.4134	53.4206	43.7167	48.4438	33.2974	31.5895	26.5356	23.443	30.679	24.3049	26.1769	27.5743	31.4823	24.8165	71.7076	30.1467	56.2223	86.9354	49.6262
2.57_642.0445m/z	642.044	2.57377	0.420959	0	0	0.0972869	0	0	0	0	0	0.569133	0.481323	0.885925	0	0	0	0.47113	0	0	0	0.531677	0	514.644	534.637	527.392	507.836	548.645	487.372	455.739	449.449	440.655	373.87	389.335	309.47	277.707	274.099	265.616	233.649	244.919	286.966	255.055	251.583	247.033	1605.6	190.473	143.882	408.111	344.445
0.92_501.0339m/z	501.034	0.922017	0.301183	0.0687452	0.479589	0.0322817	0	0.461624	0	0.704254	0	0	0	0	0.1891	0	0	0	0	0	0	0	0	400.194	397.165	403.275	400.245	366.215	291.467	206.746	186.087	198.199	187.873	199.093	204.902	191.284	201.256	198	180.898	183.417	196.578	192.768	178.346	196.433	232.69	266.506	89.75	125.056	30.6599
3.10_724.6672m/z	724.667	3.09733	0.729205	1.07488	0.273733	0.763592	1.90271	0.771576	1.16635	0	0	0	0.538483	0.0080699	0.456738	4.06109	0	0.704352	0.0335996	0.433725	0	0	0	1674.09	1667.72	1613.2	1668.12	1651.83	1565.98	1489.72	1392.34	1441.15	1293.83	1282.73	995.839	1061.72	971.67	1009.95	954.802	896.797	880.062	938.859	1050.61	886.149	4438.9	499.679	872.603	2564.3	1044.26
0.88_613.8516m/z	613.852	0.8754	0	0	0	0	0	0	0	0	0	0	0	0	0	0.222168	0	0	0	0	0	0	0	40.5215	45.8292	41.4313	38.53	56.2184	19.5421	32.5643	37.3512	40.1732	29.5631	28.1643	20.7582	17.429	22.3283	19.7205	4.53728	12.5516	16.9723	11.6515	9.92013	19.8565	37.5517	3.00357	19.9508	44.8735	28.6364
3.18_626.7863m/z	626.786	3.17838	1.0408	1.57828	1.1364	0	1.41535	0.361786	1.32758	0.713816	1.01895	0.245768	1.42218	0.48172	0.739458	0	1.14586	0.0655855	0.766754	0.335606	0.503906	0.354297	0	1949.13	1941.95	1942.76	1978.03	1931.18	1601.61	1640.57	1467.7	1621.53	1397.55	1402.25	1131.81	1228.49	1107.81	1118.19	1082.63	1045.9	1060.81	1065.62	1164.08	1087.57	5847.61	703.67	964.956	3410.24	1141.02
1.03_249.1087m/z	249.109	1.0301	0.641418	0.577581	0.0855975	0	0.324738	0.552513	0	0	0.4762	0.312734	0	0	0	0	0	0	0	0	0	0	0.016224	451.93	436.195	432.479	448.114	465.121	353.889	365.21	324.489	337.668	293.027	303.613	221.143	193.675	194.55	203.763	183.516	189.73	181.537	197.558	185.292	185.352	563.773	157.561	298.755	512.111	366.4
0.87_261.0394m/z	261.039	0.87	0.14255	0	0.927104	0.171597	0	0	0	0	0	0	0	0	0	0	0.292289	0	0	0	0	0	0.282318	278.464	267.609	265.7	264.976	263.753	206.637	241.868	213.026	208.342	210.546	217.196	120.737	162.765	167.429	154.365	133.292	137.055	171.152	168.14	144.925	172.345	175.126	103.021	204.485	176.713	60.4242
1.14_430.7003m/z	430.7	1.14158	0	0	0	0.54903	0	0	0	0	0	0	0	0	0	0	0	0	0	0	0	0	0	74.2687	83.8046	75.3131	74.6897	74.7852	71.0034	73.8248	63.7502	72.7611	50.4808	58.578	43.1422	28.3414	26.9176	35.441	36.8385	27.2711	29.9827	29.4319	25.2473	30.0333	169.546	23.4856	39.1544	151.936	47.2526
2.98_470.4745m/z	470.475	2.97505	0	0	0	0	0.0896638	0.517773	0	0	0	0	0	0	0	0	0	0	0	0	0	0	0	82.7176	82.0412	80.8212	85.7769	92.0055	85.6724	76.7256	59.5857	72.294	64.0855	65.539	54.2205	56.034	40.8246	51.5551	48.2483	28.9091	41.5683	36.4462	54.8957	37.2626	203.92	23.0696	57.6299	145.258	53.8535
0.93_291.0702m/z	291.07	0.927433	0	0.0307494	0	0.22606	0	0	0	0	0.0177921	0	0.00042558	0.00281342	0	0.0105396	0	0	0	3.01001e-05	0.00302568	3.26267e-09	0	45.2328	44.2297	37.4809	38.8032	37.3107	33.2254	27.7691	24.2717	27.1869	27.5792	25.2191	24.524	20.6847	22.6577	22.7639	17.8823	21.4844	20.5779	21.5847	18.5581	22.3284	42.6216	15.2403	38.0363	33.7016	14.7183
1.24_344.0904m/z	344.09	1.24425	0	0	0	0	0.0980558	0	0	0	0	0	0.273402	0.0248844	0	0	0	0	0	0	0	0	0	70.6324	69.9636	76.4519	75.7774	71.0995	59.0962	62.0307	53.0075	54.7007	40.8535	43.6569	28.1659	26.9033	23.8806	28.9869	20.5152	23.4728	26.2037	25.8072	13.5694	23.7359	130.898	21.711	56.3926	122.004	54.8393
2.92_586.0877m/z	586.088	2.9156	0	0	0	0	0.00130247	0.756134	0	0	0	0	0	0	0	0	0	0	0	0	0	0	0.00947473	138.603	132.644	127.057	123.616	117.573	104.777	107.65	104.608	97.7565	93.5597	94.8558	78.2358	54.052	60.3189	44.9537	61.8833	62.099	50.9718	45.1835	59.9549	46.6363	296.59	26.5173	49.6408	63.713	26.5367
0.86_313.9992m/z	313.999	0.864583	0	0.0246258	0.202799	0	0	0	0	0.193481	0	0	0	0	0	0	0	0	0	0	0	0	0	67.0217	67.8553	60.1059	61.9581	53.9779	38.2513	49.1356	41.4102	38.9844	42.5365	39.4574	29.5845	23.2639	25.6375	26.7107	18.4153	20.5812	23.0452	23.7296	19.2569	28.9583	82.7822	22.2	46.7085	87.9304	78.5031
0.85_401.0711m/z	401.071	0.853783	0	0	0	0.00937417	0	0	0	0	0	0.153615	0	0	0.346329	0	0	0	0	0	0	0	0	80.8943	70.3882	75.8867	72.1339	72.9065	62.8443	56.4251	59.592	54.6388	46.7816	58.894	36.7579	36.3329	26.6259	25.4513	21.5617	21.0146	30.1891	24.4853	17.0208	25.5928	176.21	34.4655	60.1392	163.962	137.847
2.00_271.0931m/z	271.093	1.99617	0.00308319	0.27593	0	0	0.15085	0	0.697221	0.261487	0.157777	0	0	0	0.158447	0	0	0.355142	0.243915	0	0	0	0	334.834	317.718	325.642	320.004	332.647	278.021	259.806	249.796	267.696	220.359	234.49	181.918	147.045	166.278	177.399	166.888	170.916	187.799	186.777	171.265	175.66	855.525	116.651	157.398	555.171	181.804
0.97_458.1762m/z	458.176	0.970667	0	0.333221	0	0	0	0	0	0	0	0	0	0	0	0	0	0	0	0	0	0	0	35.1436	42.845	38.4036	49.6511	42.4682	40.5454	38.7865	43.828	40.3205	38.376	37.052	31.0898	20.3283	16.0276	28.1119	22.7859	27.8837	29.4307	28.5198	26.7423	23.6962	97.7761	25.2121	20.3773	68.297	21.8059
3.09_725.0013m/z	725.001	3.09192	0.0428598	0.647888	0	1.979	0	0.266794	0.700439	1.27509	0	1.00128	1.0762	0	0.0765686	0	0.153916	0	0.461422	0.223816	0	0	0	979.991	977.656	969.11	958.927	930.152	839.044	855.086	812.869	839.364	741.96	766.085	587.535	605.016	539.342	571.487	545.81	527.312	528.067	539.589	583.892	504.788	2576.03	284.008	474.243	1457.12	572.773
1.10_298.9970m/z	298.997	1.09835	0.204045	0	0.000311746	0.0241154	0	0	0	0.343582	0	0	0	0.134575	0	0	0	0.0118071	0	0.0619491	0	0	0	110.223	112.572	105.631	112.472	96.959	78.0789	72.5743	63.2731	68.3112	59.4299	60.6464	46.8558	39.5051	49.0072	49.5729	46.3998	46.3803	47.9478	42.5967	36.5809	44.9379	90.3024	84.3321	91.3348	103.378	100.364
1.03_216.5982m/z	216.598	1.0301	0	0	0	0	0	0.00392818	0	0	0	0.141487	0	0	0	0	0	0	0	0	0	0	0	27.0629	26.1184	28.0705	24.357	27.1656	18.9093	17.643	16.7782	16.2716	15.678	16.2863	8.2766	3.38003	8.44016	8.22613	5.25824	7.58516	4.49126	3.77068	3.22672	3.99261	86.5116	0.451256	26.5513	54.1321	21.9271
0.96_446.1870m/z	446.187	0.95985	0	0	0	0	0.315172	0.308198	0.77853	1.0945	0.387909	0	0	0	0	0	0	0	0.00820625	0.379641	0.00861144	0	0.277511	462.87	419.749	411.798	402.258	400.686	457.676	438.152	412.148	424.31	387.749	374.451	302.316	164.447	243.505	265.146	233.074	243.701	231.46	228.308	219.574	217.431	255.909	235.534	91.6008	235.935	52.4718
2.42_567.5124m/z	567.512	2.42447	0.0223637	0	0	0	0.203253	0	0	0	0	0	0	0	0	0	0	0	0.613983	0	0	0.000715268	0	153.988	143.224	151.228	142.078	125.898	133.667	116.685	113.634	109.493	88.7206	104.905	67.5788	61.1954	59.6215	55.8245	53.6806	56.5085	61.0733	59.6905	68.7978	56.7582	587.435	34.8027	46.0327	236.408	95.4412
4.36_625.4172m/z	625.417	4.36415	0	0	0	0	0	0	0	0.0991209	0	0	0	0	0.171612	0	0	0.120178	0	0	0	0	0	40.6394	38.1932	41.5471	64.2401	39.7441	30.3992	51.4467	35.9801	35.3662	34.6373	51.1188	41.1754	24.7957	29.6743	27.217	22.6238	22.2671	37.7263	30.4165	38.443	14.7245	85.5874	19.5696	21.5103	69.4758	19.0239
0.96_246.1087m/z	246.109	0.95985	0.356606	0.277813	0	0.462392	0	0	0	0	0	0	0	0	0	0.00665296	0	0	0	0.603104	0.0753749	0	0.294868	274.263	263.018	265.761	282.092	248.065	220.963	234.101	213.347	213.451	186.792	193.456	150.984	141.861	138.845	136.548	130.643	124.16	124.49	129.642	121.186	135.366	428.974	125.904	188.839	406.837	186.102
2.54_522.9915m/z	522.992	2.54133	0.426835	0	0	0	0	0	0	0	0.535522	0.272398	0	0	0	0	0	0	0	0	0	0.410248	0	234.346	228.279	233.158	227.725	223.601	203.451	201.657	187.235	194.515	167.61	149.981	130.016	120.871	125.503	111.221	105.89	100.068	138.587	129.816	105.604	106.421	771.883	56.7287	142.176	320.273	169.111
2.83_654.6966m/z	654.697	2.83115	0	0.555764	0.655236	0	0.823676	0.0142042	1.27994	0	0	0	0.352631	0	0	0	0	0	0.0233118	0	0	0.749054	0	648.983	623.17	604.389	595.557	596.752	532.499	475.141	479.289	463.288	424.989	431.986	311.295	328.511	292.271	291.951	293.241	261.871	265.874	298.586	308.876	273.051	1641.13	257.533	309.078	817.771	273.363
4.92_344.2069m/z	344.207	4.92015	2.13914	3.07464	3.58429	1.34098	1.84179	1.8815	1.58462	1.71127	3.67761	0.775356	0.0973511	0.494934	0	0.494583	1.46734	0.370462	0.661591	1.05085	1.04601	0.362648	1.02202	3628.95	3584.48	3565.73	3554.81	3509.6	2811.8	2830.09	2734.26	2790.53	2488.54	2637.81	2566.07	2957.29	2781.93	2472.44	2318.98	2227.9	2298.54	2351.36	2579.76	2492.63	9273.85	754.942	2792.58	7204.54	2744.58
1.11_229.0821m/z	229.082	1.10915	0.401375	0.211327	0	0	0	0.214707	0	0	0	0.00318979	0	0	0	0.048503	0.3667	0	0	0	0.00184749	0	0	191.016	164.475	165.482	156.501	161.05	148.912	139.998	121.759	113.955	108.424	124.261	109.712	69.9582	91.7045	91.3276	86.8302	82.4776	91.5953	81.1334	88.2265	74.0882	239.892	94.9411	118.441	195.551	108.54
3.42_610.2799m/z	610.28	3.41755	0.153996	0.83725	0	2.02135	0.572815	0.941101	0.490173	0	1.53	0	0	0.833531	0	1.14882	0	0.152442	0.721771	0	0	0	0	1107.73	1120.64	1103.11	1111.66	1060.72	1018.46	1007.17	963.754	967.276	852.495	871.451	718.46	791.599	716.574	751.112	704.875	673.4	682.926	653.975	743.977	668.242	3671.59	285.818	832.799	1978.57	709.621
0.90_835.8404m/z	835.84	0.897017	0	0	0	0	0	0	0	0	0.328491	0	0	0	0	0	0	0	0	0	0	0	0	46.6655	45.3894	50.704	60.6996	56.5235	20.9733	63.0836	46.6198	45.5999	35.0473	28.2323	15.0665	21.7186	30.2749	18.3693	3.90574	14.2489	25.9493	20.4577	13.1488	24.2978	40.4302	6.70044	38.055	66.3796	27.0589
1.42_486.1732m/z	486.173	1.41517	0.111094	0	0	0	0	0	0	0	0	0	0	0	0	0	0	0	0	0	0	0	0	17.9717	17.0651	11.8265	20.0676	22.082	13.5847	7.21047	10.2545	12.0132	7.52055	7.95629	5.31677	5.4771	3.98356	4.57568	8.02353	4.43552	9.9017	7.5873	5.86534	7.29887	57.2874	5.49214	19.4192	28.1595	7.9787
1.42_523.0688m/z	523.069	1.41517	0	0	0.360657	0	0	0	0	0	0	0	0	0.526884	0	0	0	0	0	0	0	0	0	161.056	161.287	156.322	147.747	128.922	93.9804	91.8582	81.4824	99.9553	80.8763	89.7109	61.4627	59.5419	63.0635	77.6199	63.1656	60.3487	59.0918	57.1038	61.5577	60.3977	426.03	26.8005	82.6733	257.709	84.5636
2.57_642.5454m/z	642.545	2.56835	0.387726	0	0.0374051	0.177734	0	0	0	0.814148	0.00330469	0	0	0.687073	0	0	0	1.33377	0	0	0	0	0	472.813	454.851	420.912	461.97	455.307	418.197	415.199	368.298	364.51	362.641	331.609	238.914	227.536	235.831	241.851	196.804	196.007	222.866	258.41	237.506	207.592	1343.35	172.538	127.469	381.094	303.785
0.81_325.0889m/z	325.089	0.80515	0	0.139744	0	0	0	0	0	0	0	0	0.185349	0	0	0	0	0	0	0	0	0	0	36.4742	39.1594	31.7426	34.9053	40.858	41.3237	32.4282	31.6992	30.3842	40.2717	38.2598	23.4978	19.7944	20.8401	25.6662	21.0306	23.127	23.1955	19.4729	17.094	15.2562	104.97	12.0357	26.0413	70.5266	24.6347
1.43_542.1871m/z	542.187	1.42598	0	0	0	0	0	0.269591	0	0	0	0	0	0	0	0	0	0	0	0	0	0	0	53.9014	50.3079	46.8379	48.0749	50.1697	31.1629	28.817	29.6552	33.6352	22.1107	26.33	15.8379	13.8974	18.7225	23.3017	17.6068	12.7612	23.1502	19.4318	16.8656	17.3154	102.986	12.4502	38.4326	43.7475	24.5072
2.69_549.2475m/z	549.247	2.69063	0.897293	0	1.50061	1.37493	0.546878	0	1.4564	0.728027	0	0.492914	0.321637	1.78465	0	0.33507	0.126829	0.936307	0	0	0	0	0	1451.83	1357.79	1369.14	1359.83	1335.83	1109.84	1144.46	1050.52	1092.5	990.104	988.396	757.772	774.901	695.9	726.258	658.839	640.229	650.699	699.362	764.189	650.365	4506.05	316.664	779.87	1811.12	749.732
0.89_523.0130m/z	523.013	0.8862	0	0	0	0	0	0	0	0.502567	0	0	0	0	0	0	0	0.39917	0	0	0	0	0	156.289	149.936	159.675	158.738	144.221	112.446	93.273	86.8073	93.4004	68.7589	86.4061	66.1444	75.8997	65.5065	73.5456	64.9735	49.4597	65.1547	65.1619	55.5014	69.1562	161.53	43.529	76.0532	101.731	30.6382
2.56_520.4942m/z	520.494	2.56295	0	0.335841	0.488892	0	0	0.0492427	0	0	0.00275558	0.304352	0	0	0	0	0	0.401556	0	0.0323586	0	0	0	227.584	262.203	223.455	221.777	215.262	176.131	186.815	178.758	194.349	155.561	155.093	129.277	115.639	99.3182	114.885	99.9174	100.979	106.921	113.492	103.81	90.0347	760.325	61.484	141.366	333.413	135.708
3.63_521.5061m/z	521.506	3.63172	0	0	0.229645	0	0	0	0	0	0	0	0	0	0	0	0	0	0.638672	0	0	0	0	118.023	114.646	115.221	111.895	102.64	119.06	116.095	104.41	104.809	102.273	102.211	75.8583	95.8245	80.0137	75.9226	72.3246	77.2415	61.6961	67.703	85.318	74.7594	283.824	11.3708	15.1364	157.294	5.14053
3.51_457.6599m/z	457.66	3.50943	0	0	0	0	0	0	0.444672	0	0	0	0	0	0	0.26603	0	0	0	0	0	0	0	116.682	100.667	119.381	108.153	115.92	76.0457	83.4296	71.15	76.0442	70.2843	74.4262	50.6891	58.4278	50.7945	47.1908	53.5896	40.9657	46.9592	46.4222	61.5418	47.3219	210.783	31.5806	50.2293	221.549	58.3508
0.92_425.0603m/z	425.06	0.922017	0	0	0	0	0.508957	0	0	0	0	0	0	0	0	0	0	0	0	0	0	0	0	58.8837	74.7009	61.0572	60.6388	66.7892	59.7659	44.2901	40.3285	30.4599	27.6077	39.0543	27.8394	26.7306	36.5498	28.9894	22.4475	21.1348	25.5711	25.0341	21.3301	31.8826	85.8813	21.5789	50.726	61.3791	20.1959
3.84_326.0384m/z	326.038	3.83505	0	0	0	0	0	0.0667117	0	0	0	0.0176252	0	0.465485	0	0.725698	0.0215998	0.299683	0	0	0	0	0	179.174	180.21	179.33	174.337	172.259	141.93	143.311	130.451	140.053	106.313	110.854	94.1938	88.6614	88.7767	97.1429	79.6591	67.59	74.2208	81.008	89.8326	72.9477	231.331	109.408	68.9422	391.087	92.8418
2.98_359.0916m/z	359.092	2.98045	0	0	0	0	0.0169504	0	0	0	0	0	0	0	0.331116	0	0	0	0	0.216934	0	0	0	100.168	83.909	89.4701	92.9209	101.229	62.817	77.4164	70.2475	63.8497	54.7101	66.6596	49.9893	45.2872	38.4842	41.5318	39.891	34.2037	36.4915	31.8259	43.8897	38.3764	204.917	24.9433	46.8111	170.005	50.6006
0.99_546.2039m/z	546.204	0.986867	0	0	0	0	0	0	0	0.5672	0	0.50119	0	0	1.01758	0	0	0	0	0	0	0	0	237.808	246.897	265.96	236.969	251.743	238.634	231.015	213.6	213.208	184.392	194.417	135.976	95.961	109.633	115.31	103.879	94.7556	89.1435	95.6856	90.3032	97.0801	395.609	187.1	184.436	302.298	151.681
3.76_453.1625m/z	453.163	3.7594	0	0.0948059	0	0	0	0	0	0	0	0	0	0.299776	0.442123	0.00945666	0.320816	0	0	0	0.148926	0	0	169.168	164.853	153.954	159.419	151.579	150.807	144.393	136.481	129.584	106.16	127.105	103.021	111.526	110.907	115.023	101.292	99.5892	85.206	106.159	100.224	95.9261	494.723	38.4735	86.8665	323.802	95.5638
1.20_398.0684m/z	398.068	1.19562	0	0.222565	0	0	0	0	0.229124	0.35376	0	0	0	0	0	0	0.248749	0	0	0	0	0	0	162.012	144.817	140.598	149.215	151.438	130.384	120.046	107.668	111.798	95.233	98.3049	68.6676	49.8609	60.6719	60.1892	52.3115	54.5631	47.5009	47.3709	46.8661	58.5241	261.007	60.3951	110.9	234.363	127.768
1.02_231.0995m/z	231.1	1.0247	0.283961	0.476082	0.39367	0.941922	0.000303098	0.140485	1.63831	0	0	0.871712	0.244762	0.653246	0	0	0.00532146	0.28231	0.335655	0	0	0	0	778.067	752.331	754.963	781.412	784.586	665.653	674.663	610.001	647.675	573.449	568.41	457.948	356.988	335.482	410.389	337.428	384.551	372.653	376.425	344.061	351.076	1588.2	366.175	468.312	1339.26	572.013
0.92_365.1055m/z	365.105	0.922017	4.8431	1.81747	2.79773	3.50401	2.12253	1.536	3.60451	2.24691	2.1746	2.0979	1.4991	2.25073	0	0.196503	0.476105	1.51584	0.45517	0.715042	0	1.37366	1.45734	3930.85	3821.18	3806.05	3677.34	3767.48	2980.87	2714.76	2604.1	2460.47	2252.41	2320.32	2269.81	2335.15	2314.77	2216.06	2028.85	2071.24	2254.64	2159.9	2046.79	2278.53	1581.83	2309.52	3253.26	1232.13	361.264
3.49_279.6866m/z	279.687	3.48782	0.290593	0.109589	0	0	0	0.0154655	0.230526	0	0	0.268702	0	0	0	0.0854567	0	0.20105	0	0.172119	0	0	0	183.78	169.334	164.293	168.188	156.66	131.208	137.51	127.105	141.483	128.222	122.189	87.0183	99.8169	96.0722	90.6277	91.5974	80.7495	88.2644	83.5457	104.63	82.1353	387.172	82.2092	89.5483	308.806	102.458
1.31_617.2437m/z	617.244	1.3125	0	0.597534	0	0.738911	0	0	0	0	0	0	0	0	0	0	0	0.0712019	0	0	0	0	0	174.623	174.895	167.334	172.237	183.772	167.057	154.434	147.538	155.068	142.39	139.865	100.888	74.7314	77.3133	90.2395	80.7952	79.5417	89.2141	92.6138	87.773	72.3219	460.923	50.7493	104.324	399.172	117.15
2.95_578.2330m/z	578.233	2.95343	0	1.0865	0.145185	0	1.03338	0	0.441528	0	0.24352	0	0	0	1.08723	0.520905	0.608344	0.5858	0	0	0.378815	0.452576	0.462509	943.772	931.894	933.173	917.749	921.16	809.495	835.767	775.354	771.994	717.247	697.306	550.235	562.269	490.827	476.522	466.601	442.52	437.096	436.902	518.345	444.065	2560.83	289.932	618.135	1523.89	618.091
0.99_634.2204m/z	634.22	0.992283	0	0	0.588771	0.46554	0	0	0	0.183242	0.770935	0	0.512326	0	0.00425311	0	0	0	0	0	0	0	0	251.688	241.473	243.821	245.016	263.529	270.558	238.416	220.591	207.251	207.663	215.387	136.406	111.747	115.012	125.156	119.148	117.394	117.211	104.085	104.222	107.299	216.905	250.524	224.609	299.398	148.561
2.69_316.0971m/z	316.097	2.68523	0	0	0.56906	0	0	0	0	0	0	0	0.188889	0	0	0	0	0	0	0	0	0.315384	0	166.215	179.988	162.861	171.096	157.53	131.211	124.671	119.088	128.408	99.6477	104.892	80.8578	79.3316	86.5433	79.1377	78.077	66.9013	74.6424	80.8831	94.8951	73.9617	468.989	58.6906	105.584	241.213	123.2
4.54_427.1591m/z	427.159	4.54048	0	0.201109	0	0	0	0.615295	0.429413	0	0	0	0	0	0	0.209186	0	0.523926	0.298096	0.492828	0	0.253296	0.447906	448.067	452.678	423.353	455.542	426.911	372.008	374.812	328.448	368.677	324.226	326.762	316.289	337.914	312.511	272.106	257.666	259.924	259.458	249.837	302.331	257.295	995.832	119.296	298.156	704.346	373.557
1.06_204.1265m/z	204.127	1.05712	2.05084	0.87751	1.53595	1.90118	1.23323	1.04095	1.75832	0.408754	0	0.543365	0.78689	0.736505	0.287125	0	0.359207	0.973672	0.368595	0	0	0.78054	1.04571	2606.86	2506.22	2480.54	2472.33	2474.07	1683.32	1888.51	1666.71	1694.46	1512.94	1526.65	1155.92	1200.81	1268.81	1254.33	1113.02	1163.15	1218.15	1274.65	1208.49	1232.83	6104.68	842.29	1097.88	5423.53	886.388
0.86_336.0137m/z	336.014	0.859183	0	0	0.296967	0	0.201523	0	0	0	0	0	0	0.0802336	0	0	0	0.00201132	0	0	0	0	0.117768	91.1624	88.3485	89.2572	80.2233	92.6254	66.5344	64.5176	54.8064	57.8631	47.7094	50.0913	32.0138	34.7767	28.0416	40.6129	23.7321	30.1188	31.3321	29.1653	33.3649	39.3126	151.052	47.7771	53.0799	125.662	86.4576
2.57_587.1829m/z	587.183	2.57377	0	0	0	0	0.249046	0.285919	0	0.445496	0	0.275421	0	0	0	0	0	0	0	0	0	0	0	129.553	106.766	109.557	110.72	108.825	108.415	107.668	112.866	88.1855	96.765	101.211	82.7887	57.914	64.725	66.7378	67.0348	48.8742	57.0709	59.449	42.6852	53.7481	244.298	2.89713	212.2	231.417	217.753
1.10_259.0944m/z	259.094	1.09835	0.233785	0	0.0224788	0.362633	0.718074	0.000681764	0.734072	1.10267	1.00368	0.223229	0.473167	0.203604	0.00517703	0	1.09347	0.519044	0.00463658	0.0542181	0.255707	0.0346713	0.0213018	825.081	815.237	829.73	818.322	834.57	713.741	701.356	631.455	655.173	601.472	597.129	465.962	408.929	412.763	433.781	389.361	396.554	408.319	386.893	399.207	388.376	1407.89	343.095	737.498	1035.21	637.975
4.72_455.0840m/z	455.084	4.7168	0.00572594	0	0	0	0	0	0.504837	0	0	0	0	0	0	0	0	0	0	0	0	0	0	61.4818	60.0398	57.9099	69.5639	53.6123	46.8311	47.8052	43.4475	43.0389	39.5808	37.3099	39.5939	52.3358	53.9219	37.7983	45.049	25.4929	31.3771	45.9246	31.9472	28.5178	43.1406	17.2657	48.4874	66.1154	68.4487
0.86_276.8709m/z	276.871	0.859183	0	0	0.24704	0	0	0	0	0.217335	0	0.013506	0	0.0486492	0	0.138	0	0	0	0	0	0	0	79.4092	58.6025	68.0413	64.6551	64.2983	45.5243	52.0108	50.3796	46.9231	44.9535	47.4913	28.8862	21.7542	32.5447	27.5014	17.6667	21.8413	27.4812	24.9463	20.5055	22.9301	23.2558	11.6836	173.251	82.9428	69.0388
4.12_152.5830m/z	152.583	4.11757	0.0434432	0	0.0332989	0	0	0	0.0975037	0	0	0.241051	0	0	0	0	0	0	0	0	0	0	0	10.4195	10.9474	9.41238	15.6802	14.7656	15.2806	8.56761	9.54081	8.87284	8.79825	8.25118	7.66449	12.448	8.14459	6.4752	8.78086	9.09559	9.19055	8.46158	6.74981	5.5889	0.00489797	0.10792	0	0.250443	0.731277
2.79_517.4885m/z	517.489	2.78792	0.346935	0	0.835693	0	0.246098	0.686536	0	0.042095	0	0	0	0	0	0	0	0	0	0	0.233502	0	0	338.087	304.438	300.236	276.156	256.911	236.072	227.292	234.835	226.465	223.848	226.989	164.74	152.253	131.906	142.482	114.331	127.008	114.372	131.439	147.882	121.592	746.44	73.3359	169.525	455.497	182.547
2.71_600.8714m/z	600.871	2.71225	0.707108	0.706818	0	0	0	0	0	0	0	0.257263	0	0	0	0	0	0	0	0	0.310007	0.00875093	0.191042	271.003	257.004	258.811	247.07	245.802	231.796	226.194	219.747	208.498	197.812	179.154	140.501	116.706	128.59	149.342	133.546	107.223	132.755	122.985	153.376	119.724	876.002	75.5481	126.604	378.085	167.349
5.55_498.1138m/z	498.114	5.54978	0	0.248856	0.05996	0	0	0	0	0.0117798	0	0.553493	0	0	0	0	0	0	0	0	0	0	0	76.4256	84.6596	83.1526	78.9443	79.3484	71.85	79.8722	69.842	55.5658	59.0216	73.6831	64.8071	43.6004	69.5874	59.7456	47.5442	62.0544	49.2751	61.0152	57.4235	50.1774	59.5825	27.6687	58.0522	122.651	88.727
4.94_376.2685m/z	376.269	4.94177	0.387176	0	0.478423	1.05179	0	6.82025e-05	0.482918	0.0235622	0	0	0.80545	1.09299	0.0879734	0.022113	0	0.95015	0.0598932	0.526001	1.01081	0	0	824.777	839.116	809.266	800.128	789.126	653.308	660.667	632.125	653.142	587.252	611.351	608.313	652.976	630.066	561.645	532.195	507.526	527.984	542.893	571.866	558.439	1699.21	149.81	810.171	1288.7	884.355
0.88_449.0658m/z	449.066	0.8754	0	0	0	0	0	0	0	0	0	0	0	0	0	0	0	0	0	0	0.603027	0	0	93.274	87.8608	96.9168	81.4549	80.1702	62.0653	72.5359	70.6994	66.5994	50.8355	50.8534	32.5319	37.7613	44.0478	40.5452	31.4457	38.0406	40.1123	35.3235	40.916	50.2323	89.8637	55.2768	76.5061	53.4149	11.2111
1.15_430.1979m/z	430.198	1.15238	0.312698	0	0.108917	0	0.448654	0	0	0	0.604365	0.717163	0	0	0	0	0	0	0	0	0	0	0.400958	319.118	305.495	288.957	291.085	308.125	275.327	270.556	245.337	240.218	219.358	234.907	172.999	130.687	147.011	156.281	147.718	140.581	131.02	145.186	128.387	146.734	632.025	116.449	164.602	527.252	221.778
0.90_1006.0644m/z	1006.06	0.897017	0	0	0	0	0	0	0	0	0	0	0.256317	0	0	0	0	0	0	0	0	0.027418	0	41.7228	46.6096	47.3774	48.5042	46.7303	33.6465	28.5666	26.1947	14.7608	31.876	27.9981	18.5909	23.5985	29.9222	18.676	6.06219	17.352	17.5707	24.0702	8.24688	23.5891	57.2167	15.3113	30.3071	57.9237	14.8009
4.38_302.1398m/z	302.14	4.38037	0	0	0	0	0.486328	0	0.626663	0.672004	0	0.403427	0	0	0	0.213196	0	0	0	0	0	0	0	162.318	163.708	176.602	167.371	154.328	133.902	131.437	124.801	130.664	120.396	118.732	113.848	105.964	114.995	120.252	103.185	109.648	87.3744	103.151	110.287	93.3651	339.697	33.7948	64.3039	122.037	98.7163
0.92_517.0073m/z	517.007	0.922017	0	0	0	0.0154849	0	0.716381	0.243744	0	0	0	0	0	0	0	0	0.131166	0	0	0	0	0.328641	223.368	221.82	217.885	231.512	213.571	153.358	129.386	114.069	110.593	101.433	113.429	100.4	108.539	112.106	108.112	90.2782	91.5897	96.8694	93.1346	82.9561	114.116	219.832	164.465	89.0036	142.857	57.2768
3.89_589.9457m/z	589.946	3.8891	0	0	0	0	0	0	0.180115	0	0	0	0	0	0	0	0	0	0	0	0	0	0	16.4831	23.7636	25.5558	25.1094	23.3687	20.2635	21.1317	19.0101	13.3349	11.5526	16.8782	15.4998	11.4079	20.464	10.387	13.1443	9.09491	9.53187	16.9404	10.918	3.30062	87.5274	5.99459	9.77587	45.3151	15.5804
1.18_337.0643m/z	337.064	1.1794	0.462318	0.456459	0	0	0	0	0	0	0.0895277	0	0	0	0.00664426	0	0	0	0	0	0	0	0	81.4024	84.4772	85.562	78.3815	94.5581	70.997	70.6184	57.6297	57.6545	54.5884	59.4787	35.1513	20.0237	15.9619	25.1493	22.4364	22.1338	23.858	20.029	17.8821	23.7518	95.9831	30.977	154.719	160.601	54.6084
1.16_435.7005m/z	435.701	1.1632	0	0	0	0	0	0	0	0	0	0	0	0	0	0.177483	0	0	0	0	0	0	0	23.3155	25.3767	21.8293	27.5133	28.0991	23.564	32.1696	22.6673	21.8218	15.5854	10.8818	10.5169	7.37508	10.0104	11.3745	7.77643	4.31045	10.864	8.53873	12.3433	7.59533	77.8922	2.79262	10.3625	45.8726	13.3705
1.06_351.1579m/z	351.158	1.06253	0	0	0	0	0	0.322548	0.488632	0	0	0.344482	0	0	0	0	0	0	0	0	0	0.163956	0	216.657	209.723	191.745	198.512	205.783	154.663	145.301	124.019	133.797	114.911	122.345	76.8932	79.1459	80.5377	87.2895	67.9163	79.7149	80.9269	88.4335	68.1618	79.7352	508.696	50.4643	141.664	411.09	107.426
4.68_347.1255m/z	347.126	4.67898	0.553659	1.15012	0	0.574725	0.643356	0.0462739	0.689826	0	0.468262	0	0	0	0	0	0.00373135	0	0	0.102934	0	0.279856	0	431.242	419.802	423.857	412.723	406.417	405.7	380.319	372.747	385.99	332.007	352.675	330.323	339.032	347.347	308.741	317.911	277.662	282.613	298.043	330.35	286.221	874.707	152.802	272.173	521.763	376.369
3.04_248.0958m/z	248.096	3.03788	0.272018	0.437958	0.505985	0.125931	0.71762	0	0	0	0.476242	0	0.48172	0.399979	0	0	0	0	0.461075	0	0	0.428871	0.284548	599.214	556.453	569.329	564.813	547.966	417.637	437.467	419.266	419.821	343.41	364.313	311.861	346.766	336.429	348.341	307.074	300.434	296.363	303.568	358.925	299.713	1577.41	206.11	304.299	766.159	202.605
1.05_601.2073m/z	601.207	1.04632	0	0.28974	0.761473	1.31446	0.189102	0	0	0	0	0	0.375345	0	0	0.0321864	0	0	0.307966	0	0	0	0	440.465	424.316	394.116	399.09	412.673	316.328	304.569	278.472	280.671	269.599	266.02	198.228	181.247	189.513	185.309	180.048	189.549	187.662	210.45	169.034	177.94	924.934	172.992	331.462	626.934	310.991
0.96_497.2072m/z	497.207	0.95985	0.427613	0	0	0	0	0	0	0	0	0.559037	0	0	0	0	0	0	0	0	0	0	0	125.492	99.9137	103.662	108.849	111.839	123.397	101.407	98.1543	92.9527	82.647	101.201	66.5829	36.1652	55.1224	62.054	45.6638	52.9165	49.6199	47.6231	46.5861	57.6103	205.026	42.1306	84.8766	149.659	116.942
0.92_512.1040m/z	512.104	0.922017	0	0	0	0	0	0	0	0	0	0	0	0	0	0	0	0.782806	0	0	0	0	0	119.97	122.197	104.204	100.506	101.621	68.1268	62.2428	61.7297	57.87	52.0358	51.9054	56.377	51.4214	62.4966	59.7421	60.3361	46.8821	50.8662	47.7959	45.0601	53.9098	48.0849	63.5814	74.8432	34.596	10.2581
0.81_447.1369m/z	447.137	0.80515	0	0	0	0	0	0	0	0.466965	0	0	0	0	0	0	0.337326	0	0	0	0	0	0	71.6915	66.062	75.4303	70.5208	71.0436	78.9085	83.0588	74.9434	79.6357	65.2853	68.6921	52.5097	37.8635	38.833	53.1668	43.6101	50.5656	43.3885	43.9992	39.8943	39.2729	172.347	46.6501	62.6455	126.158	87.3867
2.56_642.2945m/z	642.295	2.56295	0.643712	3.22508	1.45744	1.80183	0.476349	0	1.25581	0	0	0	0	0	0.519892	0.819763	0	0.514677	0	0.587128	0	0	0	1247.5	1224.39	1239.88	1206.66	1266.5	1103.25	1116.85	1020.42	1028.81	900.484	923.048	621.145	635.833	624.011	599.639	535.658	548.869	588.073	584.568	659.27	554.55	3712.87	370.392	594.877	1605.25	852.052
0.96_377.1182m/z	377.118	0.95985	0	0.0976388	0.00189178	0.433075	0	0.0177219	0.453949	0.0890808	0.407227	0	0.0195678	0	0	0	0.347992	0	0	0	0	0	0	241.96	221.555	217.502	220.714	228.961	207.226	197.268	180.997	169.434	142.753	160.694	104.55	88.0909	99.0463	106.261	95.2553	93.5105	94.5192	92.3545	94.5405	93.1079	406.85	101.64	161.663	322.059	170.497
2.83_654.4959m/z	654.496	2.83115	1.01645	0	0	0	0.502187	0.0673828	0.208052	0	0.324651	0.832926	0	0	0	0	0	2.76873	0	0	0	0.737793	0	695.87	714.298	676.393	704.611	737.308	625.951	617.04	556.4	558.961	508.936	535.048	385.652	407.309	357.696	353.015	325.455	299.81	311.577	332.73	403.469	365.029	1863.04	313.285	335.928	922.784	285.574
1.46_169.1342m/z	169.134	1.4618	0.0915338	0	0.116564	0.160828	0.264433	0.517854	0.571251	0	0.00240234	0	0.0692761	0.533508	0.435286	0	0	0.175062	0	0.274956	0.552077	0.159928	0.221725	510.525	479.697	462.15	487.699	484.674	404.298	409.1	380.581	385.131	360.876	356.076	308.996	258.08	286.326	313.136	289.866	286.384	298.466	307.094	290.58	293.646	2708.45	23.442	426.801	1131.44	95.105
2.98_578.5959m/z	578.596	2.98045	0	0	0	0	0	0	0	0.3577	0.330749	0	0	0	0	0	0	0.027872	0	0	0	0.821045	0	222.429	211.611	188.515	209.504	186.315	172.255	189.724	165.097	141.468	132.252	149.823	98.8185	101.106	101.084	91.1067	90.9431	84.8026	96.0245	78.6683	89.0168	75.1655	701.066	62.1131	110.061	341.437	97.5775
2.26_349.1394m/z	349.139	2.26435	0	0	0.88522	0	0.302307	0	0	0	0	0	0	0	0	0	0	0.179749	0	0	0	0	0	185.391	181.247	177.265	174.566	175.443	134.131	132.541	133.81	128.794	122.244	112.977	77.5175	65.4577	74.2182	74.468	68.6151	63.3261	70.581	72.0474	57.6826	62.3485	364.839	68.4467	122.974	300.705	137.159
3.26_552.2556m/z	552.256	3.25745	0.591339	0.0728726	0	0	1.41122	1.26459	0	0	0	0.742158	0	0.412311	0	0	0	0.174227	0	0	0	0	0	487.034	496.489	504.919	513.368	484.058	456.388	430.31	392.162	410.158	368.058	368.954	292.099	321.695	300.268	255.453	284.511	255.365	254.226	272.344	292.251	270.666	1176.51	197.927	261.484	805.907	259.619
4.71_468.0906m/z	468.091	4.706	0	0.307465	0	0	0	0	0	0	0	0	0.791393	0	0	0	0	0	0	0.986118	0	0	0	173.292	163.416	173.278	184.885	163.953	179.42	174.243	151.517	158.562	127.853	133.167	132.221	138.468	150.252	122.704	115.95	105.004	115.791	106.692	118.775	117.339	92.8398	55.5345	161.29	197.735	266.897
0.99_198.0878m/z	198.088	0.986867	0.646192	0.528536	2.15774	0.48413	0.378912	0.375784	0.622835	0.728513	0.342766	0.151138	0	0.329477	0.755797	0.52626	0.0585246	0.463309	0.0921057	0	0.0642905	0.0799408	0.134194	838.19	823.144	843.409	852.747	822.731	831.048	828.739	748.46	750.56	692.485	697.669	529.379	438.062	419.241	422.749	415.93	392.361	402.39	392.159	387.497	399.219	1574.39	385.881	879.738	1126.1	1079.11
6.04_294.9199m/z	294.92	6.04093	7.06706	3.31625	5.95729	14.4317	7.29612	4.90074	3.27487	9.37829	8.68549	5.81837	7.53683	2.89316	0.491333	1.2469	0.854756	1.47723	3.80229	2.71021	5.23483	4.78799	2.55054	0.581436	0	0	0.585571	0	11.0616	5.17347	3.5234	5.21473	0.855194	2.60645	0.532043	0	0	0	0	0.689743	0	0	0	0.665005	0	1.23516	2.55728	7.83106	5.80643
4.71_542.1770m/z	542.177	4.7114	0	0	0	0	0	0	0	0	0.213322	0	0	0	0	0	0	0	0	0	0	0	0.0713129	31.9535	30.2093	30.8704	35.0875	29.1182	26.9655	31.8555	20.352	25.7826	18.9712	21.273	21.4596	19.8515	24.7147	13.6723	26.0772	16.1092	14.5029	14.5818	16.6462	15.8656	30.1394	5.68897	22.7919	34.8522	32.9796
1.40_276.0721m/z	276.072	1.40437	0.679489	0.239356	0.547493	0.228319	0.0276194	0.449087	0.0778543	0	0.287849	0.323776	0.0346216	0	0.308849	0.185227	0.0904225	0.180889	0	0	0.453798	0	0.680145	572.625	561.775	536.108	566.057	555.512	457.389	439.417	436.265	448.734	378.725	399.478	279.305	253.939	268.646	292.424	249.942	267.752	261.489	300.95	264.078	276.234	1101.76	303.486	363.817	928.604	368.882
1.05_242.0160m/z	242.016	1.04632	0.817694	0.254462	0.693186	0.122345	0	0	0.0549915	0	0	0	0.0711563	0	0	0	0.00939922	0	0.382401	0	0	0.25511	0	345.441	347.339	338.596	342.049	346.463	249.15	260.198	227.71	243.766	201.366	215.542	148.276	145.572	146.483	151.188	135.807	140.854	138.55	143.634	139.386	154.39	549.196	172.066	224.889	487.796	227.124
4.83_245.1500m/z	245.15	4.82828	4.69751	1.33411	1.5208	2.11247	2.71566	3.21323	2.3603	0.539868	2.45516	1.73816	0.839239	0.95777	1.16795	0.0777929	3.18021	1.84739	0.641053	1.06288	0.583028	1.25099	0.903429	3099.28	2997.97	3017.4	2993.23	2942.42	2891.71	2636.46	2729.11	2792.49	2429.35	2662.42	2656.15	2669.3	2788.09	2691.99	2477.05	2467.4	2436.46	2540.17	2713.95	2474.91	10007	639.103	2235.56	4506.39	3370.1
1.30_248.1485m/z	248.149	1.30168	0	0.0405351	0.0960043	0	0.23219	0	0.410713	0	0	0.000117729	0.301816	0	0	0	0.111603	0	0	0	0	0	0	135.429	153.61	133.227	126.819	132.536	121.463	113.988	118.118	111.684	99.3197	100.778	83.8538	68.2116	70.4247	71.6032	65.7751	72.2363	71.0846	68.7418	59.9578	67.1355	403.73	21.7103	67.0709	370.051	49.5367
0.89_1137.9580m/z	1137.96	0.891617	0	0	0	0	0	0.229346	0	0	0	0	0	0	0	0	0	0	0	0	0	0	0	43.9488	25.562	40.2834	35.7257	28.4883	10.4924	26.9539	26.4484	9.03362	19.9531	18.9262	12.1947	11.3241	19.0368	9.22536	8.96728	13.8439	18.4124	11.4935	12.4458	12.4477	44.8247	7.16396	11.9169	35.5383	13.9797
0.88_1049.1831m/z	1049.18	0.8808	0	0	0.947998	0	0	0	0	0	0.0515546	0	0	0	0	0	0	0	0	0	0	0	0	137.017	143.819	134.064	98.1358	125.917	74.6405	91.7761	84.3338	73.117	60.1321	63.3075	38.1207	49.2652	74.4359	71.613	61.4816	49.9377	67.67	53.386	64.7073	57.3011	156.812	14.0105	119.222	143.326	67.813
1.04_314.0872m/z	314.087	1.0355	0	0	0.12803	0	0	0	0	0	0	0.0234201	0	0	0	0	0	0.621769	0	0	0	0	0	108.159	78.0203	94.536	93.1602	94.2679	77.7304	81.4648	71.7402	65.802	59.8104	62.3	49.1909	31.6679	39.4814	39.9148	29.0074	36.088	38.788	29.4705	35.9331	38.3286	129.533	32.3909	76.444	122.582	92.7057
2.74_326.1464m/z	326.146	2.73927	0.372122	0	0	0.521317	0	0	1.40344	1.26266	0.481323	0	0	1.02255	0	0	0.37532	0.394974	0.322812	0	0	0	0	599.89	559.151	580.912	560.654	560.572	566.733	565.039	524.156	536.628	467.502	476.647	371.249	299.294	302.409	316.085	307.039	280.614	276.019	316.024	350.663	289.997	1330.1	240.631	399.528	670.365	459.635
1.16_313.0558m/z	313.056	1.1578	0	0	0.437635	0	0	0	0	0	0	0.455948	0	0	0	0	0	0	0.445328	0	0	0	0	158.439	165.819	146.931	147.156	161.105	136.631	138.138	109.383	131.116	112.797	115.873	89.4075	65.3592	62.4826	74.3154	65.6161	63.1696	69.5046	77.4067	62.8316	69.0769	287.411	68.96	111.225	180.836	143.423
1.07_254.0866m/z	254.087	1.07333	0.675003	0.0119269	1.08324	0.370091	0.968056	0	0	0.945304	0	0	0.401413	0.0753369	0.39502	0.716522	0	0.229866	0	0	0	0	0.716751	703.649	668.609	661.569	667.612	666.592	565.008	560.058	508.827	503.968	471.71	473.894	366.542	310.334	325.044	340.504	289.309	300.683	311.899	313.171	306.198	324.498	1026.88	439.17	503.219	992.373	513.212
1.31_233.1136m/z	233.114	1.3125	0.0300902	0.527534	0	0.320259	0.396692	0	0.517539	0.982007	0.390062	0.832644	0	0.37365	0	0.73005	0.567879	0.792601	0.637325	0	0	0	0	748.439	712.217	730.702	736.748	726.009	702.402	681.589	646.301	658.296	589.831	615.343	460.709	351.508	392.32	426.343	382.656	385.335	403.842	420.599	384.102	404.986	1165.72	145.597	267.345	1284.85	313.771
1.06_265.0869m/z	265.087	1.06253	0.313629	0	0.159988	0	0	0	0.484741	0.0378319	0	0	0	0	0	0	0	0.315598	0	0	0	0	0	146.339	133.698	150.865	151.985	140.245	103.6	117.843	103.279	104.927	86.4408	95.5627	73.8722	61.934	63.4786	61.2818	58.731	57.0241	59.7745	63.4971	62.7335	55.1365	216.82	61.8635	86.5256	218.368	111.509
3.98_396.1235m/z	396.123	3.97907	0	0	0	0	0	0	0.680131	0.0642195	0	1.0802	0	0	0.34375	0.11763	0.382279	0.399598	0	0	0	0.638335	0	336.046	356.042	342.333	353.477	338.214	332.415	308.113	294.802	311.119	284.164	290.388	288.709	261.436	258.197	256.601	237.91	226.856	233.104	241.296	267.491	233.686	404.462	59.82	127.328	266.803	369.635
1.10_267.0596m/z	267.06	1.10375	0	0	0.406541	0.96805	0	0.314209	0	0	0	0	0.967139	0	0	0	0	0	0.349915	0.789045	0.44989	0	0	476.818	444.977	425.225	409.672	428.274	343.526	343.261	320.054	321.019	286.092	301.739	243.215	191.383	228.047	239.244	233.184	240.797	232.457	261.205	214.764	233.224	495.256	158.343	344.899	517.144	220.21
1.14_475.0502m/z	475.05	1.14158	0	0	0	0	0.290701	0	0	0	0	0	0	0	0	0	0	0	0	0	0	0	0	40.1308	31.1078	40.9718	30.6305	34.583	34.5607	31.0194	26.0303	28.2022	23.6906	30.1846	13.7442	7.9152	17.9055	20.1091	15.508	19.0371	13.293	16.2215	10.3854	20.1285	66.7953	14.9148	27.9218	49.6484	25.2807
0.90_455.0114m/z	455.011	0.897017	0	0	0	0	0	0	0	0	0	0	0.578705	0.0554485	0	0	0	0	0.0114414	0	0	0	0	77.5977	86.1813	93.9357	73.8307	75.834	50.8286	51.7965	42.3271	38.0622	34.3781	47.4797	38.6227	45.8818	46.6256	46.3187	36.7991	40.7155	45.9962	42.5917	36.0368	49.4245	90.4132	12.9754	116.137	92.0876	46.5735
1.46_227.1758m/z	227.176	1.4618	0.209354	0.498477	0.140981	0.795429	0.139824	0.705584	0.485807	0	0	0.130525	0.363207	0.447258	0	0.421577	0.511535	0.143572	0.322191	0.278474	0	0.776225	0	752.443	718.791	700.01	715.005	675.434	618.259	553.068	578.008	562.95	504.358	525.413	450.767	373.404	428.883	439.709	386.267	417.569	424.063	445.678	431.856	431.295	3902.26	37.0547	612.801	1669.86	135.329
0.87_1012.1961m/z	1012.2	0.87	0	0	0	0	0	0	0	0	0	0	0	0	0	0	0	0.807129	0	0	0	0	0	120.932	106.38	127.01	109.619	102.358	81.3187	74.1342	58.9661	70.5437	60.1208	52.8848	33.3068	33.889	41.291	64.2825	51.3504	61.6621	49.0215	46.8655	44.9108	40.6834	135.596	13.8853	91.2353	114.999	59.5295
3.88_312.1544m/z	312.154	3.87828	1.27141	0	0.721514	0.704865	0.0968361	0	0.819144	0.332001	1.10384	0	0.502594	0.945637	0.467819	0.264692	1.60002	0.0877854	0	0	0.303082	0.351715	0	824.644	839.082	828.431	824.293	829.243	658.455	670.656	619.997	655.781	559.755	563.927	541.685	595.124	570.66	542.301	497.304	483.377	505.519	520.548	577.373	500.999	1513.53	256.579	349.898	961.944	492.532
1.10_641.0361m/z	641.036	1.10375	0	0	0	0	0	0	0	0.315186	0	0	0	0	0	0	0	0	0	0	0	0	0	50.7256	42.4881	35.2985	38.4517	37.2686	30.4621	19.7584	25.2236	25.9715	23.235	27.6326	14.535	15.7952	19.0072	19.4204	11.9522	18.9147	15.7766	17.7739	13.9107	17.0867	27.1557	27.0875	20.4485	32.8238	29.8452
4.99_441.1725m/z	441.173	4.9938	0.160751	0.78566	0.831284	0	0	0	0.978711	0	0.623003	0.670929	0	0	0.266167	0	0	0.302887	1.57737	0.506785	1.03724	1.06071	0	848.734	778.755	827.687	809.421	776.968	656.825	646.826	644.286	656.164	551.307	639.406	584.929	655.223	674.599	636.232	568.139	556.8	541.049	580.411	632.038	603.652	955.644	149.4	357.088	783.534	389.079
1.10_245.0776m/z	245.078	1.10375	2.42527	0.674266	1.92822	0.329089	0.290833	1.93563	1.54218	0	0.35907	0.670548	1.33226	0	0	0	0.741395	0	0.153954	1.12121	0	0.723682	0	1514.11	1429.47	1446.59	1434.04	1425.69	1156.17	1173.69	1076.25	1111.48	980.519	1019.97	815.863	711.237	781.922	788.588	726.761	762.522	778.363	814.74	771.287	786.157	2317.88	698.241	1034.95	2029.71	1026
0.81_263.5860m/z	263.586	0.81055	0	0	0	0	0	0	0.15577	0	0	0	0	0	0	0	0	0	0	0	0	0	0	20.1771	17.7661	17.6244	22.4551	19.1933	17.9063	14.5033	15.7812	11.88	9.02149	16.8768	6.61726	6.94832	4.01767	6.20269	7.35668	8.60961	6.6885	7.93208	10.1037	7.92675	31.6042	2.48951	10.2148	12.6112	5.73473
5.37_470.1324m/z	470.132	5.37347	0.376542	0	0	0.00200255	0	0	0	0	0	0	0	0	0	0	0	0.211334	0	0	0	0.000625398	0	43.8198	37.9991	44.4664	41.5217	44.0041	34.8903	34.3237	28.8759	26.6472	32.9509	28.8873	32.5517	34.0113	28.5765	16.0347	31.1017	18.8128	17.4774	25.4759	25.788	21.9848	76.217	11.0076	30.5252	39.0308	29.4947
4.21_569.2904m/z	569.29	4.21485	0.684267	0.0887146	0.91702	0	1.11539	0	0	0	0	0	0.942233	0	0.511414	0	0.323956	0	0.741028	0.484863	0	0	0.594086	435.215	441.017	438.019	440.628	437.841	342.898	354.644	309.659	339.303	270.3	289.147	278.61	292.81	275.229	259.316	241.878	239.862	257.846	256.715	242.593	241.726	223.353	346.943	21.4595	135.522	21.9912
3.44_663.5614m/z	663.561	3.43917	0	0.567997	0	0.957236	0	0.349091	0	0	0	0	0	0	0	0	0	0.624603	0	0	1.48761	0.709717	0	429.074	394.413	400.512	411.905	414.613	350.249	357.343	313.997	343.647	346.348	308.621	263.124	272.396	258.687	267.204	237.378	225.812	235.685	249.699	268.237	244.888	1256.12	96.6622	358.709	592.609	342.384
1.55_509.2284m/z	509.228	1.55367	0.640557	0.0018269	0.511831	0	0.172699	0	0	0.532092	0	0	0	0	0	0.359787	0.237307	0	0	0	0	0	0	296.493	286.11	280.383	266.742	280.983	217.393	226.547	211.077	200.603	190.993	179.031	135.57	125.262	125.431	118.68	101.277	111.274	133.982	123.605	114.39	124.752	856.633	120.337	135.358	707.946	180.757
2.93_456.7243m/z	456.724	2.93182	0	0.119292	0	0.632141	0.0838304	0	0.404879	0	0	0	0	0	0	0	0	0	0.57898	0	0.292313	0	0	219.17	217.746	208.799	232.623	218.242	203.555	185.405	178.466	179.076	147.667	167.888	121.773	115.825	97.8166	111.276	111.556	105.368	97.666	99.796	127.359	113.297	541.576	51.4595	102.809	476.881	120.15
0.86_274.8740m/z	274.874	0.859183	0.758099	0.697909	0.766748	0.0255806	0.187757	0.00640603	0.472439	0.00115918	0	0	0	0	0.210007	0.184753	0.0270344	0.086792	0	0	0	0	0	289.876	261.928	269.984	254.985	261.225	191.696	197.352	200.175	182.725	171.289	179.651	123.788	95.4798	101.624	93.9261	74.4266	80.7837	87.2928	87.6374	81.0112	97.3403	111.699	33.9999	739.711	356.447	300.022
1.55_628.6082m/z	628.608	1.55367	0	0.246552	0	0	0	0	0	0	0	0	0	0	0	0	0	0	0	0	0	0	0	32.2995	27.8825	34.6432	25.5849	26.1602	20.6029	18.102	23.4397	21.2406	19.1024	22.222	13.9418	7.19533	10.9648	6.1238	7.85852	9.23026	9.76975	7.33969	3.62646	7.76533	115.248	18.1086	14.7181	116.082	9.43557
5.21_332.2427m/z	332.243	5.21335	1.62635	0.397895	0.846939	1.62352	0.605835	1.15258	1.25878	0.0987528	2.31803	0.935088	1.49813	0.665863	0.441245	0.497327	1.02849	1.53745	0.170538	1.26369	0.000170169	0.451248	0.0318123	1427.75	1496.21	1416.2	1484.45	1446.31	1321.64	1249.52	1239.09	1285.61	1195.31	1359.47	1320.07	1245.18	1228.96	1173.06	1148.63	1148.68	1029.49	1108.91	1238.78	1139.47	5182.7	442.923	765.839	3340.64	1036.97
1.83_261.0066m/z	261.007	1.83065	0.28952	0	0	0	0.0299579	0	0	0	0	0	0	0	0.0141071	0	0	0	0	0	0	0	0	38.451	31.6871	35.765	31.4052	33.3271	33.6591	30.9981	27.6012	30.2833	20.9611	30.3217	17.0883	13.6052	26.1839	18.8194	21.4958	15.6315	20.1958	20.069	14.8175	18.8182	55.8389	14.8345	35.8187	26.0652	19.2797
6.22_294.9200m/z	294.92	6.21725	4.65102	1.6619	4.98244	17.9031	5.17047	3.72894	15.1847	5.15569	11.5256	8.13701	10.8508	5.6579	3.1581	2.90684	3.8969	1.67738	6.39713	2.00896	4.67112	9.36541	7.65544	1.59737	3.09049	2.77269	7.81292	10.4848	5.70936	2.39101	3.4646	3.0568	0.615311	2.88757	0.517548	0	0	0	0	0	0.858627	2.11577	0	1.463	5.94141	10.5978	5.62506	11.9605	8.84523
2.56_646.5431m/z	646.543	2.55755	0	0	0	0	0	0	0	0	0	0.679047	0	0	0	0	0	0	0	0	0	0	0	83.478	72.595	62.1855	62.4953	68.3888	45.3641	58.5065	53.9776	56.5485	56.6373	63.1161	21.4533	33.0145	30.772	47.9167	34.1951	25.683	38.7878	25.3686	28.3107	28.1068	217.985	25.0683	24.9037	60.8301	52.2941
1.04_246.1447m/z	246.145	1.04092	0.593233	0.0137744	0.141495	0	0.415886	0.00054632	0	0.235545	0.233086	0	0	0	0.325039	0	0	0	0.326126	0.296387	0	0	0	272.785	251.481	257.527	262.928	270.826	218.791	235.038	202.857	224.721	197.984	198.004	148.966	117.616	127.199	133.648	129.289	116.537	127.235	121.29	122.262	117.067	573.525	113.309	178.49	388.761	198.749
0.84_547.1503m/z	547.15	0.842967	0	0	0.354668	0	0.510288	0.0531139	0	0.333252	0	0	0	0	0	0	0	0	0.402994	0	0	0	0	238.015	207.962	237.138	234.256	216.052	159.196	176.601	163.718	163.899	137.435	144.299	100.655	95.1381	86.9092	64.3738	66.6242	64.5609	72.8098	63.131	64.424	83.2885	418.645	76.3236	176.326	336.41	151.194
3.13_574.0130m/z	574.013	3.12975	0	0.648987	0	0	0	0.151672	0	0	0	0.0495866	0	0	0	0	0	0	0	0	0	0	0	86.4211	103.766	76.3198	90.8941	85.1187	78.7936	93.2169	91.5519	67.8666	80.0805	64.9662	48.0693	49.3293	47.4791	43.2908	45.056	28.304	43.2509	46.8484	41.2348	32.377	310.644	18.6894	64.0007	166.396	60.9814
0.86_426.8242m/z	426.824	0.859183	0	0.894287	0	0.0993652	0	0	0	0.0602554	0	0	0	0	0	0	0	0	0	0	0	0	0	82.2578	90.481	79.8679	77.3559	84.1667	58.0315	57.8362	55.2085	50.5169	54.9019	55.4411	29.519	29.857	30.7958	31.946	25.1282	24.5147	30.357	25.0764	22.4264	30.8436	42.5835	11.187	233.981	98.4396	102.71
3.75_393.2222m/z	393.222	3.7486	0	0.476685	0.0795126	0.381348	0.112671	0	0.00031637	0.198801	0.00111717	0.00415415	0.00875663	0.52002	0.00887493	0.125671	0.27296	0.555724	0	0.00340676	0.197152	0	0	304.701	294.727	288.115	280.031	282.394	250.853	238.286	215.854	222.057	187.059	205.417	186.962	198.45	195.975	190.839	188.959	178.274	171.899	176.982	177.113	162.793	880.077	111.423	155.368	510.898	151.763
2.53_383.1926m/z	383.193	2.52513	0.393433	0.139186	0	0	0.513123	0	0	0	0	0.117207	0	0	0	0	0	0	0.530563	0	0	0	0	189.622	188.372	184.696	183.534	184.266	136.92	160.302	151.304	159.032	131.928	131.697	101.203	67.0088	84.4934	91.8901	72.3213	80.4108	77.5205	75.6367	81.4381	76.6557	560.614	74.6348	67.751	519.391	78.6384
0.86_662.8705m/z	662.871	0.864583	0	0	0	0	0.450348	0	0	0	0	0	0	0	0	0	0	0	0	0	0	0.444794	0	96.8414	116.545	124.118	103.732	121.01	107.13	100.425	82.413	77.3934	66.6578	67.0937	45.2891	48.9248	54.9401	68.7928	51.4721	48.8256	55.7118	56.9997	54.0128	50.7797	145.607	38.8639	49.9414	92.3209	40.2564
2.71_750.6719m/z	750.672	2.71225	0	0.173462	1.20605	1.10132	0.732242	0.0781802	1.28368	1.02486	1.4509	0.139056	0	0.778748	0.671013	0	0	0	0	0	0	0.98561	0	913.009	899.424	936.115	868.559	889.655	811.35	765.498	769.792	767.156	647.214	651.755	518.508	498.599	432.008	461.889	443.321	429.931	430.442	474.838	526.251	444.318	2551.53	272.963	274.365	775.011	719.256
0.97_325.1135m/z	325.114	0.970667	0	0.455045	1.87997	0.0416435	1.86647	0.022277	0.399027	0.990814	0	0.722198	0.516861	0	0.915741	0	0.892627	0	0.38295	0	0	0	0	636.231	613.934	632.486	626.844	616.82	577.083	525.845	539.68	530.353	441.998	458.593	349.234	286.086	337.407	325.866	294.457	273.162	299.619	304.407	286.775	317.402	516.004	694.013	708.882	804.82	404.327
1.01_238.0390m/z	238.039	1.00848	0.207722	0.654861	1.00446	0.761651	0	0.300212	0.610519	0.023863	0.412003	0	0.240943	0.704547	0.232681	0.364197	0.42647	0	0.0208843	0	0	0	0.0257401	613.385	585.22	602.589	600.203	614.791	542.707	561.693	456.4	474.056	457.6	458.591	344.626	281.707	273.622	269.225	264.263	264.312	270.159	261.86	250.565	265.599	870.341	312.696	571.232	759.13	508.205
1.95_454.1820m/z	454.182	1.95495	0	0	0	0.00745099	1.00199	0	0	0	0	0	0.367661	0	0	0	0	0	0	0	0	0	0	163.467	152.514	157.353	162.734	156.644	115.48	111.958	111.759	111.439	90.9415	90.1833	62.1419	65.104	61.0677	75.9519	66.7014	71.9385	60.6325	74.5654	69.0594	65.6351	426.233	52.4548	99.8348	279.775	96.752
3.19_711.0966m/z	711.097	3.1892	0	0	0	0.333383	0	0	0	0	0	0	0	0	0	0	0	0	0	0	0	0	0.118075	52.2747	40.1961	46.8523	60.5423	46.7518	37.8806	39.4309	42.2532	39.6574	25.5769	33.9803	31.0189	18.5796	14.9407	23.3938	16.9662	20.1212	19.3064	21.4038	25.9403	17.4094	107.199	11.9738	19.0802	52.6785	14.6045
2.71_589.4686m/z	589.469	2.71225	0	0	1.04077	0.679688	0.104954	0.46701	0	0.270667	0	0	0	0	0.529999	0	0	0	0	0	0	0	0	279.372	290.541	295.643	289.221	272.746	267.478	258.055	238.351	236.256	193.592	200.255	160.356	148.427	143.485	148.231	155.717	136.309	123.88	140.864	163.326	116.826	831.802	95.6311	165.653	450.901	171.947
0.97_592.2440m/z	592.244	0.96525	0.177279	0.539173	0	0	0	0	0.266327	0.0440629	0.609602	0	0	0	0	0	0	0	0	0.512442	0	0	0	198.227	190.197	207.655	181.366	190.139	231.13	218.99	231.917	200.212	184.731	182.352	142.016	91.1593	104.107	119.838	108.348	109.755	98.9604	102.27	100.771	95.9205	114.729	50.2988	54.9541	301.814	27.1852
2.80_643.0916m/z	643.092	2.79872	1.81428	0.00579161	2.13746	0.140331	0.43808	1.60141	0	0	1.15411	0	0	0	0	0	0	0	0	0.378774	0	0.604875	0.752067	838.638	846.694	845.647	802.499	858.061	695.03	753	658.921	678.933	578.734	606.115	475.794	440.577	423.38	400.72	439.465	362.634	385.964	412.672	451.38	411.111	2387.31	193.893	513.139	1316.24	617.736
4.24_422.1386m/z	422.139	4.23647	0	0.614853	0	0.276372	0.525192	0.574463	0	0	0	0	0	0	0	0	0.135219	0	0	0	0	0	0	196.049	208.922	193.237	203.473	195.416	162.384	154.487	140.201	140.287	121.959	129.343	139.054	148.002	122.456	135.029	126.974	107.95	103.979	122.04	110.759	110.908	542.153	120.914	123.687	301.326	141.427
0.86_394.8750m/z	394.875	0.859183	0.556641	0	0.0506838	0	0	0	0	0	0	0.591431	0	0	0	0	0	0	0	0	0	0	0	75.0407	71.5063	81.0734	76.9519	72.1665	55.5942	51.0177	49.9013	45.2866	48.7435	51.1444	32.3472	27.2484	28.515	20.6426	18.4565	20.301	28.2466	24.3583	19.0956	30.9268	27.8356	5.50245	154.899	39.6961	15.1968
0.97_620.2472m/z	620.247	0.970667	0.663757	0	0	0	0.283081	0	0	0	0	0	0.528046	0	0	0	0	0	0	0	0	0	0	118.957	88.8255	92.8664	106.951	111.214	111.907	117.776	101.953	115.785	98.2757	100.303	67.4663	34.5453	56.689	68.2191	59.376	56.2428	60.3863	57.2239	50.103	45.3454	69.8615	42.4274	22.8064	159.944	23.4583
1.71_314.0822m/z	314.082	1.71377	0	0	0	0.639317	0	0	0	0.23807	0	0	0	0	0	0.298004	0	0	0.394669	0	0	0	0	175.02	159.868	165.541	164.528	159.104	138.196	148.152	134.631	145.257	114.424	127.42	92.2444	55.929	76.3713	71.3506	73.1056	71.8603	71.4912	65.1728	68.2835	73.7839	483.422	70.939	116.758	304.028	108.89
0.84_715.0719m/z	715.072	0.842967	0	0	0.165804	0	0	0	0	0	0	0	0.0583557	0	0	0	0	0	0	0	0	0	0	27.39	25.9011	17.476	30.3774	20.8999	22.0354	20.2175	13.6777	12.4496	7.09808	15.1683	16.4729	7.34401	7.02673	5.74495	4.55626	5.17701	9.02036	3.75922	5.0515	4.66592	40.4668	9.82377	31.3739	51.6422	52.8973
1.21_250.0387m/z	250.039	1.20643	1.17159	1.10348	0.270622	1.11467	0	0.150193	0.399468	0	0.460609	0.429122	0.205451	0	0.332405	0.0921419	0.0366991	0.941261	0.193428	0.464383	0.243977	0	0.228104	819.752	809.447	798.224	820.385	791.649	638.718	664.21	617.716	635.003	567.839	544.927	401.737	336.98	326.688	336.882	309.863	299.296	313.509	356.561	311.47	321.31	1853.54	330.427	785.059	1018.64	817.486
0.99_457.2271m/z	457.227	0.992283	0	0	0	0	0	0.635284	0	0	0.294281	0.397034	0	0	0	0	0	0	0	0	0	0	0	132.624	131.148	122.539	136.95	131.492	115.742	108.26	113.83	113.7	106.247	110.363	87.1424	46.8442	45.0171	62.1222	57.4974	62.8879	60.7189	63.6466	50.9501	51.9733	391.363	44.2829	70.1152	233.842	89.2047
0.92_320.0726m/z	320.073	0.922017	0	0	4.70552e-05	0.422424	0	0	0	0.348022	0	0	0	0	0	0	0	0.400099	0	0	0	0	0	125.379	118.029	134.563	121.706	121.574	107.593	106.328	96.1269	91.2795	85.3959	81.1731	54.3961	66.2157	63.6491	62.4485	58.4036	49.376	59.5631	55.118	51.5769	52.6412	153.644	39.557	82.7451	132.598	44.9851
1.07_601.7774m/z	601.777	1.06793	1.18448	0.572067	0.632171	0.00874546	0	0	0.489691	0	0	0	0.750341	0	0	0	1.00201	0	0.300507	0.396698	0	0	0	621.633	585.153	528.529	553.172	564.216	432.52	431.165	383.914	373.555	329.503	353.284	254.796	229.577	241.857	261.63	239.629	242.908	239.847	265.97	247.947	249.939	1706.74	176.683	393.959	913.423	332.572
3.41_609.7786m/z	609.779	3.41215	3.97649	3.88497	1.20728	2.33977	0.282385	0.85395	1.57159	0.181858	0.799662	1.24207	2.5592	0.237671	0	0	0.806983	0.407705	0.467788	0	1.02952	0.340302	1.43935	1966.01	1968.86	1887.79	1959.62	1867.7	1697.3	1720.4	1610.87	1644.65	1460.69	1456.07	1248.85	1348.92	1181.82	1229.17	1222.29	1140.3	1172.65	1112.5	1261.7	1123.02	6260.78	482.68	1426.23	3325.21	1277.15
1.01_454.1559m/z	454.156	1.01388	1.02089	0	0	0.423508	0.762018	0	0	0	0	0	0.317505	0.102386	0	0	0.494293	0	0	0	0	0	0	292.037	255.385	266.194	271.09	285.275	246.36	229.628	228.332	214.94	193.658	187.73	134.332	127.08	114.502	119.326	104.228	116.838	118.15	112.951	110.782	128.768	440.461	203.035	254.242	393.941	244.033
3.18_626.2837m/z	626.284	3.17838	2.27437	2.52267	2.96575	1.11581	5.60409	3.82234	4.26538	0.829368	0.994865	0.539867	0.897258	0.995972	3.2327	2.69008	2.05344	0.941678	1.53705	0.00576101	1.78537	0.884149	0.132962	3496.11	3421.9	3409.58	3493.26	3364.97	2897.93	2860.17	2710.83	2753.46	2399.29	2445.01	1948.33	2080.98	1876.46	1955.2	1878.53	1793.48	1818.61	1899.67	2058.58	1897.29	10184.4	1273.61	1712.66	6158.68	2057.5
0.99_409.0845m/z	409.084	0.986867	0	0	0	0	0	0	0	0	0	0	0.442505	0	0	0	0	0	0	0	0	0	0	54.7987	51.3819	56.9995	55.4913	56.7925	48.4722	39.2372	38.7403	35.478	29.7015	23.1529	20.2757	18.9321	18.4888	24.4683	16.6451	10.7354	15.8573	12.0808	14.7763	21.5153	87.1511	19.8009	35.8363	79.8296	39.4254
3.40_505.2601m/z	505.26	3.39593	0	0	0.471298	0	0	0	0	0	0	0	0	0	0	0	0	0	0	0	0	0	0	45.742	49.1873	51.4154	46.9554	53.9465	38.1611	29.9683	25.5089	40.3727	27.6701	30.0307	27.0276	23.4524	30.8517	25.1292	22.8014	19.6579	24.071	19.3624	33.5562	21.382	187.946	3.49609	5.25976	96.3622	16.8818
3.83_301.1405m/z	301.14	3.82965	1.15511	0.667855	0.341482	0	1.19302	0	0	1.00371	0.254464	1.01886	0	0	0.312889	0	0.447433	0.321514	0	0	0	0	0	585.849	595.876	601.383	600.837	582.548	528.496	503.731	505.561	526.141	442.356	438.944	404.581	399.906	378.587	373.129	339.283	322.911	331.359	363.794	384.706	327.371	2564.61	106.737	438.403	786.094	227.814
3.04_715.0957m/z	715.096	3.04328	0	1.30514	0	0.128571	0	0.2065	0	0.409576	0	0	0	0	9.20882e-05	0	0	0.00251989	0	0	0	0.0402961	0	203.246	182.357	168.652	187.43	187.513	143.714	140.37	145.639	140.715	111.301	123.563	108.243	92.4083	98.2486	87.6222	83.188	77.1563	84.051	94.898	102.258	84.0613	468.361	74.7375	124.653	178.132	80.0219
0.85_563.1249m/z	563.125	0.853783	0	0.379386	0	0	0	0	0	0.827209	0	0	0	0	0	0	0	0	0	0	0	0	0	104.645	105.413	106.027	108.196	105.739	87.0873	63.4314	80.7714	72.1472	61.2592	66.9839	43.0329	37.7421	35.8179	37.6201	22.6645	24.6863	35.3421	30.4603	30.0937	30.2675	317.727	64.1142	106.103	262.197	294.02
3.17_436.1665m/z	436.167	3.16758	0	0	0	0	0.369873	0	0	0	0	0	0	0	0	0	0	0.123322	0	0	0	0	0	52.7354	54.6093	68.9214	54.1398	47.7591	40.9059	24.1186	37.7627	40.1891	30.5642	31.6535	20.4194	19.7888	31.2852	26.5892	19.1835	21.7699	28.7845	22.8914	31.7927	29.1466	126.923	15.7379	20.3709	86.1289	26.698
0.93_406.1346m/z	406.135	0.932833	0	0	0	0	0.374832	0	0	0	0	0	0.82814	0	0	0	0	0	0	0	0	0	0	113.967	109.846	115.941	112.195	97.5397	90.105	76.8341	74.615	64.3861	67.578	65.067	56.5349	55.302	53.2705	50.479	46.094	44.5802	51.2959	46.8908	46.0507	58.1912	132.628	43.2888	83.9468	125.386	52.2606
2.97_693.9824m/z	693.982	2.96963	0.72583	0	0	0	0.915436	2.46385	0.249194	0	0	0	0	0	0	0	0	0	0	0	0	0	0	415.835	396.486	423.972	431.373	394.715	333.892	317.311	334.306	314.247	274.977	286.596	200.283	210.452	206.527	200.633	185.702	176.879	180.834	186.063	208.133	168.469	1131.7	131.69	139.456	543.229	271.287
0.89_1071.7602m/z	1071.76	0.8862	0	0	0	0	0	0	0	0.407841	0	0	0	0	0	0	0	0	0	0	0	0	0	49.2585	53.1751	42.0783	40.8199	31.4245	19.3109	33.995	45.2208	40.7765	36.1919	32.4054	24.9219	19.1901	18.3975	9.23638	14.1369	20.044	17.6605	16.7611	7.81539	16.9999	35.2813	2.06976	15.1405	28.2571	27.7397
6.64_350.9870m/z	350.987	6.64015	5.75075	7.64376	3.46335	2.30288	1.36737	4.39944	3.01496	7.64538	5.51122	8.95919	10.156	15.5756	24.5357	10.5146	18.9922	11.6322	12.0914	8.06297	3.02318	6.12526	2.0897	0.636228	0.487381	1.42062	2.03753	2.58247	0.167629	1.31874	1.75256	0.710206	0	3.6697	10.6654	5.73947	6.14503	2.06299	7.52447	0	2.2962	0	2.32179	2.36549	1.57634	0.638794	2.33484	0	0.413239
1.22_409.0204m/z	409.02	1.21723	0.0444544	0.82525	0	0.54818	0.0371414	0.105479	0	0	0	0.389938	0	0	0	0	0	0	0	0	0.478638	0.487412	0	314.883	311.787	298.854	317.293	313.338	227.484	237.143	202.285	220.591	183.56	202.33	121.931	121.463	122.089	119.516	106.754	99.5184	123.174	124.938	108.865	119.205	566.565	56.5939	137.712	367.092	115.443
2.72_751.3392m/z	751.339	2.71765	0.911011	0.208273	1.77792	0.373063	1.51235	0.874017	0.521484	0	0	0	0	1.36245	0	1.05453	0	0.658264	0	0	0	0	0	761.782	767.754	754.815	790.332	799.512	659.769	672.649	641.436	662.989	563.143	566.822	448.82	405.306	404.856	382.634	391.928	362.588	360.895	421.097	449.733	373.951	2347.6	204.704	301.27	793.529	552.934
3.88_184.5607m/z	184.561	3.87828	0	0	0	0	0	0	0	0	0	0.434418	0	0	0	0	0	0	0	0	0	0	0	41.0499	42.784	40.1327	41.9802	46.0898	28.9886	27.8343	23.6643	28.1541	16.5165	27.9526	22.0313	21.0146	23.9076	23.8914	23.2864	22.8647	18.8733	21.1268	25.5934	22.7701	75.6489	18.7303	29.5579	54.9102	28.6924
1.04_609.7748m/z	609.775	1.0355	0.717246	0	0	0	0.46994	0	0	0	0	0	0	0	0	0	0	0	0	0	0	0.047266	0	140.456	137.378	132.611	138.464	131.163	97.9157	102.373	91.7909	88.1309	80.2019	88.6608	56.1885	55.0419	53.4249	54.1184	43.8424	49.9432	48.7976	50.4429	57.0121	48.876	330.588	45.8	110.79	212.178	97.1298
4.93_322.1329m/z	322.133	4.92555	0.239754	1.04006	0.937874	0.0116853	0.552345	0	0.311796	0	0	0	0.405453	0.737424	0	0.232714	1.05745	0.194504	0	0	0.268664	0	0	483.461	500.276	484.895	480.104	486.281	403.95	401.505	406.626	399.459	355.976	375.152	363.114	412.441	400.993	350.591	340.289	333.924	321.431	364.97	382.148	353.26	1696.44	116.427	402.014	469.019	319.058
4.36_263.1036m/z	263.104	4.35875	0	1.16458	0.294963	1.14915	1.09285	0.17069	1.53459	0.119321	2.12928	0	0.917604	0	0.522079	0.234299	0.454507	0.149063	0.331999	0.698338	0.475346	0	0.216385	833.752	863.582	839.734	796.909	824.801	793.905	735.488	719.54	748.732	644.824	652.881	607.947	649.457	599.542	592.741	538.692	516.967	535.055	545.975	559.102	512.459	821.046	463.084	444.386	707.81	649.504
2.01_254.1615m/z	254.161	2.00697	0	0	1.01175	1.09039	0.654724	0.623465	0.610901	0	0.194416	0.221649	0.517024	0	0.0127813	0	0	0.547702	0	0.216994	0.135866	0.429089	0	343.636	323.584	325.614	333.617	340.272	293.777	278.976	271.509	270.066	237.202	248.705	206.767	150.282	177.667	182.619	173.496	178.958	173.755	186.844	181.454	179.437	158.55	280.07	47.3847	94.4033	59.9438
3.10_675.0575m/z	675.057	3.10273	0.158936	0.229069	0	0.719062	0	0	0	0.216799	0	0	0	1.39416	0	0.0528501	0	0.642456	0	0.18204	1.58936	1.07281	0	558.345	523.276	535.475	545.535	537.709	504.288	481.919	454.285	484.688	414.551	414.306	337.73	337.35	323.904	318.002	290.721	272.89	284.76	288.622	332.876	267.784	1674.65	165.255	225.968	600.672	438.938
3.33_474.1859m/z	474.186	3.3277	0	0.2169	0.00210315	0	0	0.0393093	0.409424	0.119019	0	0	0	0	0	0	0	0	0	0	0	0	0	68.0957	77.4256	70.6069	84.398	77.0038	58.3026	68.1223	66.1234	58.2867	53.3963	64.1712	42.9223	36.5112	35.8951	40.317	34.1559	34.2518	27.5836	32.219	34.2761	38.3693	192.606	12.1037	62.4487	130.364	42.153
0.85_327.0528m/z	327.053	0.848383	0	0	0	0	0	0	0.549332	0	0	0	0	0	0	0	0	0	0	0	0	0	0	50.3736	41.4456	42.9552	36.3887	41.3457	35.4603	28.3796	28.4222	27.6495	19.9532	25.1182	13.7896	16.5541	18.379	17.0968	9.86847	15.609	14.605	10.9793	12.3108	15.8861	53.0955	19.9222	23.9091	33.0707	15.4036
3.44_461.4871m/z	461.487	3.43917	0	0	0	0	0	0	0	0	0	0	0	0.248235	0	0.600952	0	0	0	0.488022	0	0	0	114.534	113.045	129.811	117.095	106.087	103.269	116.357	102.956	96.6556	112.414	110.038	77.6721	87.2151	81.7458	75.4945	78.903	70.5042	65.5268	86.238	89.6761	76.886	187.859	41.0851	25.1559	129.478	1.40875
3.97_77.0393m/z	77.0393	3.97367	0.0172963	0.0250047	0	0	0	0.000224679	0	0	0	0.15638	0	0.164116	0.172691	0	0	0.0798871	0	0	0	0.0239987	0.106171	34.1089	37.1359	41.7215	35.021	34.8677	37.4573	41.1519	36.772	38.0712	33.8213	38.3336	36.1027	29.3165	32.354	32.4472	26.2999	24.7895	24.1359	25.5673	30.3788	26.4293	59.1498	14.3795	15.6892	40.2122	22.4763
6.66_348.9897m/z	348.99	6.65635	5.81188	6.31834	3.61643	4.15619	3.00549	4.92661	5.01968	4.95881	5.11084	13.2269	13.6853	23.2772	23.2562	15.196	15.4569	15.4696	9.72559	9.86385	4.73478	1.37973	8.4021	2.67348	1.18331	1.37981	1.99615	0.648987	1.13083	0.967606	1.66212	1.97329	0.608429	4.65492	6.07694	11.8588	5.05342	6.22707	2.38408	4.07013	1.31466	1.60469	4.992	0.742813	1.66479	1.8054	3.36088	0.794871	2.64411
1.21_423.0078m/z	423.008	1.20643	0	0	0	0.468656	0	0	0	0	0	1.21469	0	0	0	0	0	0.13028	0	0	0	0	0	172.186	155.924	171.047	156.985	165.185	121.293	123.017	121.106	98.5818	99.8738	109.607	73.2564	67.6536	63.7674	66.134	60.2734	62.9196	59.0289	61.777	58.3158	68.7712	258.539	29.294	90.7307	201.468	60.2907
2.74_548.5310m/z	548.531	2.74468	0	0	0	0	0	0	0.42934	0	0	0	0	0	0	0	0	0.429749	0	0	0	0	0	86.3569	99.6872	73.9592	80.1197	75.3076	75.5844	78.2972	77.9003	56.4103	47.664	54.8944	38.0013	28.4684	32.0466	36.4267	30.5193	32.6349	28.8053	33.168	42.3589	36.4625	268.18	15.7918	47.5256	162.913	46.2414
3.24_736.0050m/z	736.005	3.24123	0.295821	1.91127	0	0.604645	1.7661	1.48758	0.675575	4.15705	0.0138535	0.599414	1.12577	0	0	3.11823	1.68274	1.89348	0	0.43005	1.13889	0	0.140476	1654.12	1658.49	1622.75	1633.81	1616.16	1453.09	1477.47	1351.88	1449.38	1231.89	1219.87	1072.83	1111.57	987.95	1001.4	966.379	904.191	957.525	903.425	1064.38	924.356	4771.74	527.039	880.265	2331.5	970.952
4.72_323.0572m/z	323.057	4.7168	0.601363	0.133518	0	0	0.00982736	0.0283413	0.309985	0	0	0.340458	0	0.444867	0.0180232	0.373836	0.530089	0	0	0	0.155818	0.0878625	0	158.403	148.927	155.87	172.107	160.352	135.898	136.139	128.26	123.434	105.943	121.674	105.181	102.688	118.296	94.9369	90.2252	81.6732	89.7641	82.3093	100.465	89.7259	46.0115	9.54788	17.8977	35.1906	17.7342
3.16_252.0733m/z	252.073	3.15677	0.030878	0.492744	0.324189	0.366265	0.0134671	0	0.52064	0	0.278311	0.916602	0.693679	0	0	0.326874	0.00407703	0.0563355	0	0.0151295	0	0	0	386.788	371.468	361.881	382.028	374.575	292.936	293.063	274.41	295.765	248.943	242.853	196.682	219.392	190.45	197.788	184.299	168.024	179.007	180.239	206.357	180.161	663.563	123.556	302.043	481.007	286.492
0.90_1038.3188m/z	1038.32	0.897017	0	0.0160406	0	0	0	1.21966	0	0	0	0	0	0	0	0	0	0	0	0	0	0.260925	0	141.385	179.814	140.17	152.606	172.562	92.7346	116.45	128.695	125.227	115.407	83.2456	63.9269	62.2566	86.7396	68.9039	52.5935	43.2285	64.702	66.7459	43.5435	70.1441	149.693	94.5893	173.837	208.396	84.6899
1.32_202.1182m/z	202.118	1.3233	0.352739	0	0	0.136448	0.429993	0	0.354027	0	0	0	0.346922	0	0.717743	0	0.53164	0	0.083931	0	0	0.331121	0.372193	284.846	281.452	268.602	272.475	268.177	245.096	233.324	226.558	225.651	206.06	215.666	160.875	137.633	150.497	145.426	144.774	130.942	142.576	158.911	134.326	145.588	1064.99	142.224	364.195	206.561	178.27
0.98_306.0925m/z	306.093	0.981467	0	0	0	0.0922596	0.768738	0.688141	1.20047	0	0	0	0	0	0	0	0	0	0.244782	0	0	0	0	244.044	238.365	239.272	226.835	250.515	230.858	193.966	189.279	188.585	170.497	176.449	131.237	111.306	113.333	125.956	99.5401	103.588	111.083	105.805	106.3	118.153	370.964	151.216	206.359	344.511	180.003
2.42_535.4977m/z	535.498	2.41905	0.385527	0	0	0	0	0	0	0	0	0	0	0	0	0	0	0	0	0	0	0	0	36.5252	30.0644	36.7378	31.6587	34.8251	37.9149	48.4393	26.7533	45.5319	19.4652	26.7083	21.4605	20.8121	14.0713	12.3594	14.1275	17.5747	17.7108	14.5703	10.8974	18.4529	153.1	4.62082	9.78788	51.151	20.4497
2.83_654.8973m/z	654.897	2.83115	0.0753946	9.68539e-06	0	0.777387	0	0.18195	0.156372	0	0	1.3976	0	0	0	0	0.654862	0	1.00399	0	0.0507194	0	0	378.166	373.084	357.327	378.378	371.816	315.445	307.396	313.282	304.002	266.035	261.518	190.776	201.85	146.727	173.13	190.722	160.753	186.085	181.957	202.529	153.491	1104.99	178.362	197.994	507.036	194.117
4.68_320.1191m/z	320.119	4.68438	0	0	0	0	0	0	0	0	0	0	0	0	0	0.581807	0	0	0	0	0	0	0	53.8199	42.9323	41.0919	43.2651	38.2856	35.9177	34.1574	35.3434	41.8849	35.3607	38.4867	39.2812	43.7702	47.6668	29.2547	45.9132	29.9063	33.7984	34.8882	34.4543	28.8406	135.46	16.0773	32.4134	59.3465	34.7047
4.72_455.0423m/z	455.042	4.7168	0	0	0.367256	0.727203	0	0	0.121284	0.447433	0.275482	0	0	0.474802	0	0	0.149742	0.0395454	0	0.815454	0.869171	0	0	217.954	227.283	221.452	251.809	230.15	196.517	199.642	178.859	182.032	153.166	158.278	164.36	162.689	166.705	136.278	133.816	123.988	124.896	137.717	145.885	124.24	38.078	18.5863	52.4183	76.4161	95.2835
0.88_1078.1358m/z	1078.14	0.8754	0	0	0	0	0	0	0	0.668762	0	0	0	0	0	0	0	0	0	0	0	0	0	58.4508	63.8667	46.1684	62.704	51.2814	31.5214	32.2956	48.7733	62.001	54.4646	40.7233	19.6408	18.5708	36.4839	22.1705	15.3362	18.8634	17.6556	21.097	20.7085	34.5381	54.6157	10.5383	46.0369	59.6175	33.6381
1.69_282.1419m/z	282.142	1.68675	0	0.00481879	0	0	0.183868	0	0	0	0.0888857	0	0	0	0	0	0	0.137727	0	0	0	0	0	41.7331	43.8229	47.102	40.7036	37.9962	37.3933	32.7418	30.5408	25.917	28.5564	32.7555	23.4796	14.9338	20.189	14.786	14.0997	20.6142	16.9955	17.9317	17.4004	19.4914	86.9939	14.6653	27.9282	68.6411	26.716
2.73_754.3405m/z	754.341	2.73387	0.76647	0	0	0.0294733	0.0865939	0	0	0	0	0	0	0.265117	0	0	2.12005	0	0	0.82248	0.00382137	0	0	414.682	377.985	390.771	408.697	387.661	371.279	343.288	310.263	304.058	260.276	263.779	198.105	178.889	190.321	189.171	169.306	148.657	163.891	183.948	213.694	173.489	1595.05	93.3638	232.803	583.164	237.698
3.16_339.1063m/z	339.106	3.15677	0	0.0110706	0	0.404132	0	0	0	0	0	0	0	0	0	0	0	0	0	0	0	0	0	37.4112	33.4184	39.057	42.525	40.1197	36.9864	28.9311	32.4357	30.24	24.39	28.7731	10.5675	17.1024	22.4438	18.6809	22.4289	13.6955	18.6539	17.3924	19.6352	18.624	95.1335	6.61911	23.2844	63.9644	20.0575
1.07_316.0003m/z	316	1.07333	0.0212335	0.0557259	0	0	0.0343417	0	0	0	0	0	0	0	0	0	0	0.0674411	0	0	0	0	0	28.728	24.5748	19.3376	21.8376	25.7615	15.2612	11.817	12.9815	12.5104	9.22676	13.215	10.5875	4.44918	7.77951	7.27072	6.84992	8.23873	4.63372	5.33852	3.92008	5.31401	10.595	11.3032	16.33	24.3431	20.8087
0.94_594.1364m/z	594.136	0.943633	0	0.33017	0	0.287069	0	0	0	0	0	0	0	0.118803	0	0	0	0	0	0	0	0	0	85.1468	64.7465	78.2628	66.2941	72.268	65.2012	51.3062	67.7086	54.6313	48.7849	55.603	39.9838	25.8589	32.9247	31.7211	34.8353	28.3363	26.114	29.8376	21.9077	27.6135	83.6459	19.819	53.6209	60.9112	13.0972
0.88_1014.1373m/z	1014.14	0.8808	0	0	0	0	0	0	0	0.478944	0	0	0	0	0	0	0	0	0	0	0	0	0	37.0985	45.9281	32.0071	54.3587	32.5285	29.8332	42.7875	28.8616	39.0032	23.1325	27.3796	12.7222	16.3594	24.32	13.3902	14.3348	24.1946	20.3875	22.0071	17.7042	15.4043	43.2888	9.24802	29.7671	57.9995	36.0573
3.51_449.1724m/z	449.172	3.50943	0	0	0.116582	0	0	0	0.342697	0.277969	0.416794	0	0	0	0	0	0	0	0	0	0	0	0	102.631	97.3879	113.907	112.205	110.462	86.4756	87.801	68.1399	89.2168	64.6791	67.607	50.9368	66.0465	52.3602	43.5175	52.1634	41.9258	51.8871	50.3	41.5108	54.958	239.579	17.6513	48.5266	210.423	48.2203
5.18_182.6284m/z	182.628	5.18093	0.561409	0	0	0	0	0	0	0	0	0	0.189232	0	0	0	0	0.289505	0	0	0	0.0885773	0	74.9508	75.7108	79.0676	73.0356	75.1507	64.7601	62.5715	60.9998	66.3138	57.7318	59.1221	71.2255	64.3163	67.6369	58.6776	62.839	60.1211	54.7419	59.3295	65.7584	61.8934	164.18	6.08876	22.9677	52.9908	31.4836
1.40_212.0563m/z	212.056	1.39897	0.247326	0	0.322577	0.155468	0	0	0	0.114532	0.075305	0	0	0.000134572	0	0.293044	0.485312	0.00938595	0	0	0.550108	0	0.149529	223.647	215.377	220.244	218.956	203.371	155.605	168.028	148.516	157.808	135.725	143.734	106.369	103.376	107.446	101.818	95.1	88.3269	101.703	99.065	98.0041	107.892	424.743	121.641	156.835	364.866	140.725
5.20_375.1804m/z	375.18	5.19713	0	0	0	1.08121	0	0	0.314341	0	0	0	0	0.302131	0	0	0	0	0	0	0	0	0	99.6724	126.137	114.832	113.658	115.249	98.7613	71.1174	88.879	88.0804	76.5686	95.6206	88.0151	117.167	79.7972	80.4739	85.8681	64.8607	95.8052	94.068	94.9864	89.4154	252.285	31.3187	79.9147	96.2231	86.421
0.86_294.0587m/z	294.059	0.864583	0	0.228409	0	0	0	0.0014985	0	0	0	0	0	0	0	0	0	0	0	0	0	0	0	17.4501	19.6412	21.6558	19.1629	20.1243	9.24071	17.718	11.7234	13.3763	11.9011	8.04998	6.0217	4.39885	5.36156	5.74854	2.92516	3.99104	4.63314	4.85815	3.89955	3.53794	41.6963	16.392	13.9914	30.3374	26.7827
1.10_461.0645m/z	461.064	1.09835	0.225204	0	0	0	0	0	0	0	0	0	0	0	0	0	0	0	0	0	0	0.163327	0	48.3844	40.7835	42.6572	43.2074	50.7743	36.6737	45.0097	29.6346	26.3986	27.4117	31.8522	17.6981	14.5681	11.9058	13.6164	18.0208	20.4354	15.0645	17.3097	16.9116	17.7236	81.5207	16.7779	28.5979	51.0335	33.0242
2.57_565.2009m/z	565.201	2.57377	0.297926	0.30914	1.28348	0.272992	0	0	0	0	0	0.50946	0.384735	0	0	0	0	0.109253	0.504146	0	3.41155e-06	0	0	373.515	382.065	379.707	357.888	366.277	321.358	340.554	294.749	333.67	271.852	276.717	204.917	131.608	128.094	146.628	119.141	136.181	137.921	126.914	148.314	114.597	906.043	5.48371	279.831	674.22	293.337
3.79_708.0766m/z	708.077	3.78642	0	0	0	0	0	0.0615469	0.34314	0	0	0	0	0	0	0	0	0	0	0	2.31964	0	0	220.297	210.616	215.78	209.25	231.773	182.821	204.752	178.213	164.835	160.574	149.678	154.515	136.564	148.513	151.586	138.462	127.833	118.448	124.285	136.645	137.62	517.721	67.162	144.614	385.044	128.91
4.72_406.0528m/z	406.053	4.7168	0	0	0	0	0.0252649	0	0.103204	0	0	0	0	0	0	0	0	0.331756	0	0	0	0	0	50.8314	36.2329	42.0721	47.63	46.9235	35.1912	34.7391	26.8973	32.9886	21.8852	17.6972	28.8686	25.1281	27.9101	14.957	18.9035	15.2763	17.7598	9.0814	18.894	12.2405	32.1172	8.67765	41.2946	46.1977	54.1142
0.90_309.0582m/z	309.058	0.897017	0	0	0.0888161	0.145165	0	0	0	0	0	0.0366256	0	0	0	0	0.00134252	0	0	0	0	0	0	28.5822	31.3877	25.1105	19.2322	26.4428	16.2483	17.8881	13.8144	15.8753	13.6045	10.8574	11.1696	11.8899	11.5784	9.72057	11.2029	9.2795	10.7359	11.464	11.2633	10.7028	44.192	8.35767	17.1277	34.9738	19.6548
0.88_104.1077m/z	104.108	0.8808	0.369795	0.472314	0.198956	0.442469	0.554007	0.158758	0.407018	0.155141	0.151011	0.337363	0.0220308	0.0983285	0.0779458	0.357528	0.228986	0.331024	0.208108	0.212112	0.0537738	0.283414	0.0891413	381.418	369.234	375.983	370.982	362.641	241.449	303.541	277.445	272.918	245.412	228.613	171.008	236.478	228.671	224.782	199.162	206.563	232.564	232.267	227.034	240.042	415.589	191.041	226.988	501.119	274.773
4.21_450.3040m/z	450.304	4.21485	0	0	0	0	0.588882	0	0	0	0	0	0	0	0	0	0.644257	0	0	0	0	0	0	117.057	113.214	107.294	110.846	107.868	88.6726	69.4532	87.8328	68.1033	78.3534	67.6124	62.7722	71.8145	64.5875	60.9258	55.2193	48.519	47.9801	59.6626	52.934	46.8084	183.949	26.7069	66.1617	229.552	48.6801
1.30_330.9992m/z	330.999	1.30168	0	0	0	0	0	0	0	0	0.324041	0	0	0	0	0	0	0	0	0	0	0	0	31.5605	27.2205	24.0387	28.7831	27.6297	31.3276	16.8002	19.8128	21.2672	17.6074	21.1003	12.802	10.2471	13.0631	16.4516	10.0184	18.795	12.3214	12.4962	14.8537	13.9377	33.2695	6.80635	16.4505	29.1017	16.6323
1.38_241.1551m/z	241.155	1.37735	2.78668	2.79043	2.55371	1.72615	3.73027	2.3111	3.06051	1.82654	2.27934	2.20631	3.42699	0.953663	1.15976	0.376947	1.1377	0.940645	1.73693	1.17778	2.0961	0.91731	0	3238.02	3156.41	3120.05	3093.52	3047.31	2619.7	2671.99	2514.81	2510.68	2313.36	2356.59	1841.38	1567.18	1659.56	1706.14	1611.02	1605.36	1669.2	1781.03	1597.6	1650.64	5136.55	1151.25	2132.78	4323.2	2552.82
4.84_398.0684m/z	398.068	4.83908	0	0	0	0	0.58129	0	0	0	0	0	0	0	0	0.015348	0	0	0	0	0.00516459	0	0	50.4401	37.4467	49.5098	47.6063	45.9743	46.6522	38.5475	38.3075	41.1687	33.93	39.0184	30.5339	22.5803	38.1903	32.2212	35.0192	30.1268	32.0618	30.4563	32.4385	25.8709	146.516	3.86693	54.2645	45.9007	34.9006
5.71_374.2534m/z	374.253	5.7099	1.93024	0.668141	1.15587	0.323764	0.822762	1.72685	1.73532	0.953963	1.26958	0	0	0.846639	0	0	0.52895	1.65295	0.784212	1.11793	1.71558	0.0200174	0.0178502	1037.3	1056.21	993.533	989.069	994.735	947.229	878.69	865.455	936	897.086	1016.07	1008.77	978.337	973.121	911.335	885.079	844.793	837.462	928.382	882.757	846.666	2308.6	345.64	524.381	1355.91	776.822
1.01_854.3112m/z	854.311	1.01388	0.750626	1.39479	0.861728	0.499878	0	0.122817	0	0.346069	1.61305	0.0840883	0.610546	0	0.438582	0	1.1636	0.888184	0.700377	0.011922	0	0.805847	0	779.702	727.219	751.812	780.369	776.294	596.376	630.363	596.84	577.446	533.534	522.07	361.297	306.321	285.787	313.812	264.87	275.717	274.95	258.708	261.13	292.642	324.684	753.157	864.888	527.859	142.313
3.51_584.2681m/z	584.268	3.50943	0.333557	1.35985	1.73892	0.692596	0.607147	1.18756	0	2.68478	1.37665	0.447692	1.68237	0	0	0.433777	0.370544	1.40414	0	1.16473	0	1.33729	1.21472	1525.24	1529.87	1484.91	1549.41	1473.56	1228.5	1232.05	1195.71	1210.97	1048.33	1018.39	859.363	959.239	913.123	843.941	805.145	766.986	826.55	787.267	899.048	807.432	3197.99	483.402	695.163	3004.37	874.913
5.35_350.1186m/z	350.119	5.34643	0.945679	0.398566	0.238606	0.609314	0.00434596	0.80249	0	0	0.0568348	0	0.190364	0	0.539017	0.606017	0.863678	0.702856	0.388638	0.564347	1.56828	0.433472	0	535.504	525.114	503.245	507.557	495.018	436.576	404.38	421.493	444.948	387.473	449.47	423.149	445.232	446.363	401.547	360.217	364.545	337.265	367.692	401.749	359.085	215.459	27.1234	76.5203	147.828	743.624
0.88_1102.6715m/z	1102.67	0.8754	0	1.23577	0	0.740845	0	0	0	0	0	0.929687	0	0	0	0	0	0	0.145264	0	0	0	0	282.096	243.198	275.157	246.233	250.244	189.099	200.5	165.196	196.057	142.556	160.701	118.748	92.1423	122.236	115.015	111.482	127.03	131.664	118.953	129.215	150.241	278.772	23.0691	286.472	281.868	174.093
6.54_262.8929m/z	262.893	6.53948	2.77157	0.434302	0	1.45019	2.05978	0.609457	0.366833	3.69865	1.21466	4.62862	16.0165	20.5654	7.62009	2.54601	5.25075	2.33729	4.56119	5.32887	2.08854	0.885625	0	0	2.68926	1.1475	2.19138	1.68747	3.66876	3.77728	1.32111	0.188396	1.3529	2.21201	4.81893	5.82982	0	0	0.887295	0	0	1.15967	0	0	5.87569	4.34278	3.98083	1.61412	1.08679
4.42_563.7622m/z	563.762	4.4182	2.77248	3.33609	1.20505	1.08499	0	0.135071	0.885588	1.83325	0.38504	1.81217	0.653757	0.788574	0.788501	0.0195443	2.23341	0	1.83104	0.262793	0.842133	1.11909	0	1487.79	1493.64	1482.35	1541.07	1491.67	1367.43	1273.01	1224.92	1323.12	1139.31	1166.18	1147.9	1296.23	1186.37	1065.51	1091.62	1039.53	1041.73	1067.78	1161.96	1011	4245.31	387.955	1025.58	2444.68	991.131
4.77_377.1478m/z	377.148	4.77085	0.600803	1.21976	1.22972	0	0.41975	0	0.213591	0.647586	0	0	0	0	0.0842623	0.365829	0.537064	0	0.197429	0	0	0	0.688751	356.79	332.049	338.12	339.35	327.88	267.104	268.081	256.302	253.078	215.987	228.502	236.496	265.319	268.778	230.143	217.158	189.538	216.727	214.154	251.448	210.982	292.699	182.632	171.464	170.485	476.946
1.10_264.5527m/z	264.553	1.10375	0	0	0	0	0.0859324	0	0	0	0	0	0	0	0	0	0	0	0	0	0	0	0	14.9194	14.8453	12.9832	15.8992	12.4902	9.18839	6.04779	2.24446	3.08025	4.39712	3.91609	5.60762	1.60428	1.33432	2.11925	3.43442	1.84695	0.483521	3.42181	0.703949	2.72691	16.5279	4.28585	8.83395	20.5214	5.43528
2.58_625.5342m/z	625.534	2.58457	0	0	0	0	0	0	0	0	0	0	0	0	0	0	0	0	0	0	0.280877	0	0	16.5578	22.3482	33.3385	18.9727	18.655	20.6439	16.7141	23.2815	14.9572	13.7127	18.0292	9.69352	3.26234	8.12197	4.7572	5.9397	9.16638	0.66098	9.22059	7.23579	4.34832	53.8888	12.8603	8.02627	44.2055	7.55152
4.39_543.1799m/z	543.18	4.39118	0	0	0.191301	0	0	0	0	0	0	0	0	0	0	0	0	0	0	0	0	0	0	16.2733	10.5119	17.5075	17.2391	24.0608	11.3938	7.54317	14.8145	8.62413	7.84524	7.63832	2.73679	7.213	11.2779	12.3059	3.00377	11.9121	4.26069	5.97033	8.86848	8.51811	56.4464	1.69678	9.26143	23.8425	5.63847
0.86_465.9495m/z	465.95	0.859183	0	0	0	3.25523e-06	0.292603	0	0	0	0	0	0	0	0	0	0	0	0	0	0	0	0	24.0759	26.5701	28.4758	20.7772	23.8359	19.8708	19.6253	15.1948	22.7627	12.9083	17.3479	11.0908	7.07127	14.9318	16.2731	11.2975	6.77681	12.1911	8.05142	4.18556	11.3746	33.6264	9.19926	22.9547	20.6661	20.4722
1.33_374.1310m/z	374.131	1.32872	0	0.249374	0.232468	0.390971	0.384628	0.181747	0	0	0	0	0	0	0.317761	0	0	0	0	0	0	0	0	129.534	127.307	118.888	115.771	114.975	118.396	116.005	112.206	108.316	91.749	94.3073	68.9197	49.0004	50.5872	54.1674	47.6841	42.9801	57.5237	47.664	50.8076	49.5363	361.26	45.3457	155.788	225.807	152.991
3.09_743.3393m/z	743.339	3.09192	0	0.832165	1.77972	0	0.722136	0.317207	0	2.37041	0.566864	1.7841	1.96767	0	0.272495	0	0	0.881222	0.302356	1.46988	0.695579	1.83493	0	1232.01	1212.41	1241.1	1220.56	1181.61	1073.86	1061.64	1010.34	1021.37	895.171	926.39	741.823	761.222	686.782	748.597	669.794	628.413	663.938	653.267	751.706	647.347	4304.83	316.759	717.324	1755.69	763.962
1.00_168.0661m/z	168.066	1.00308	0.834239	0.0992039	0.716957	0.99821	0	0.785713	0.893363	1.4963	0.675152	1.19788	0.278458	0	0.195363	0.0847654	1.06569	0.0963364	0	0.512203	0.617096	0.66228	0.368263	469.55	322.913	403.939	436.441	396.203	589.93	543.582	482.547	457.665	435.601	569.044	338.436	325.05	321.709	242.268	272.247	231.009	304.938	340.765	462.899	376.574	494.621	272.819	303.651	505.465	686.912
0.92_441.0348m/z	441.035	0.922017	0	0	0.0510045	0	0	0	0	0	0	0	0	0	0	0.600575	0	0.00385029	0	0	0.215546	0	0	102.641	86.6158	90.1091	81.2959	74.0051	60.7375	55.3828	54.987	41.31	29.3046	40.2768	43.3472	44.9241	54.0683	54.221	41.4019	36.105	48.2329	42.0586	43.5553	54.0995	99.955	20.9806	100.359	79.4402	23.6329
3.64_659.3042m/z	659.304	3.63712	0	0.161837	0.299164	0	0.684509	0.398465	0	0.290203	0.376068	0.27478	0	0	0.158729	0.179687	0.34729	0.325439	0.134728	0	0	0	0	268.816	274.02	258.88	228.316	246.949	234.169	236.725	236.08	245.86	206.372	182.899	167.85	177.616	165.403	151.39	166.386	143.076	149.2	152.423	171.906	143.196	927.05	98.5338	50.7968	284.91	198.665
2.98_694.3162m/z	694.316	2.97505	0	0.700412	0.667633	0	0.644836	0	0	0.632599	0	0	0	0	0	0.582153	0	1.45027	0	0	0	0	0.0822554	406.427	382.844	374.133	395.17	390.287	312.504	339.598	312.18	299.286	271.339	286.66	219.377	226.306	185.32	213.788	184.612	185.639	178.615	192.785	190.839	185.508	1024.66	110.144	144.916	496.918	243.729
2.70_756.0052m/z	756.005	2.70145	0	0	0	0	0.21279	0	0.296548	0	0	0	0	0.124851	1.46692	0	0	0.0310994	0	0	0	0.00697808	0	198.535	155.68	180.555	177.677	169.765	154.241	152.218	146.376	135.402	118.945	111.464	77.2472	74.0229	83.3335	95.2072	87.9989	77.8216	79.8626	89.1892	89.4173	73.8062	527.938	51.8694	48.1216	143.154	131.503
6.39_205.0178m/z	205.018	6.39357	102.563	90.2675	97.8477	55.6987	58.2449	56.0676	68.4068	67.9267	58.3076	71.5987	68.0961	89.2743	82.7619	68.1507	76.0703	89.0152	74.8608	74.5177	72.1015	67.715	82.1184	40.0234	34.5547	31.8498	32.7328	29.4925	23.1001	22.1398	18.6105	19.5153	20.5991	28.417	31.5329	37.7456	33.3603	29.8054	29.1583	25.8239	27.6462	29.2796	30.5764	30.0664	25.6591	64.5167	48.8415	12.8615	24.2241
1.06_226.0820m/z	226.082	1.06253	1.38688	0.0569326	0.602724	0.51105	0.555002	0.134819	0.398604	0.587946	1.1447	0.167184	0.798767	0.283014	0.0296354	0.0318403	0.243797	0.748495	0.197036	0.208116	0.161234	0.101896	0.168611	678.522	662.623	642.481	642.46	640.22	512.68	525.984	461.74	477.622	425.113	428.316	344.557	295.829	317.76	321.658	294.837	290.663	299.48	308.696	299.83	312	1560.05	323.151	455.631	979.624	393.53
0.87_411.0090m/z	411.009	0.87	0	0.457352	0	0	0	0	0	0	0.255541	0	0	0	0	0	0	0	0	0	0	0	0.00105373	51.6325	70.3105	48.1747	57.7294	54.8479	42.4953	50.6593	39.8895	46.6328	34.7165	37.7523	22.86	21.3644	27.3096	27.1714	17.802	14.8752	19.2077	28.5837	17.0556	21.5413	108.21	32.4512	39.2409	61.3465	50.9587
1.90_346.0548m/z	346.055	1.9009	0	0	0.316336	0	0	0	0.480743	0	0	1.18404	0	0	0	0	0	0	0	0	0	0.00679741	0	191.03	172.99	191.603	178.062	187.891	143.086	149.742	138.369	137.269	117.121	120.627	88.9059	63.587	71.5915	79.1366	71.0827	63.7465	66.5702	67.954	74.0865	66.9339	649.404	72.0911	159.756	200.157	163.362
3.98_281.0999m/z	281.1	3.97907	1.3095	1.11114	2.24731	2.34319	1.94317	3.31539	1.63918	1.76037	2.41912	2.59909	1.73836	1.76476	2.41854	1.01465	2.30411	1.82678	2.47006	0.898392	0.578423	0.514549	1.7587	2465.32	2498.85	2498.86	2473.13	2461.22	2393.48	2352.02	2208.46	2265.63	1984.27	2054.59	1946.33	1756.38	1648.77	1641.25	1524.37	1509.25	1492.84	1522.15	1707.38	1429.93	5184.43	788.872	1931.82	3895.82	2072.27
3.14_741.6708m/z	741.671	3.14057	0	4.43069	0.785946	0	0.624847	0.571289	1.85655	0.381348	0	0.96405	0.962688	0	0	0	1.33564	0	0.0875115	0	0.428252	0	0	911.014	868.936	873.474	878.127	865.922	772.984	774.771	739.665	693.718	661.951	669.322	494.363	525.125	488.018	478.074	492.206	414.32	458.158	460.128	534.012	438.585	2421.16	255.457	564.466	1549.92	515.551
3.15_623.2574m/z	623.257	3.14597	0	0	0.343323	0	0	0	0	0	0	0	0	0.588562	0	0	0	0	0	0	0.763428	0	0	177.707	170.838	189.551	187.245	174.963	120.457	141.866	113.485	136.37	108.593	116.143	74.2799	71.212	61.043	72.4491	50.9822	55.5933	64.4721	60.9054	77.138	66.6218	411.276	4.11209	116.904	319.519	120.533
0.87_1051.1831m/z	1051.18	0.87	0	0	0	0	0	0	0	0	0.37677	0	0	0	0	0	0	0.609741	0	0	0	0	0	91.4909	102.568	84.9684	93.8766	93.6954	59.3875	72.3293	67.6568	44.9532	56.6314	50.6526	28.1652	32.9803	36.1165	35.9754	37.4772	45.6866	49.713	37.7172	41.7926	50.8262	109.981	8.23542	75.7401	103.662	71.5825
3.14_591.2635m/z	591.264	3.13515	0.921916	0.966431	0	0	0	0	0.468567	1.08417	2.91101	0.733643	0	1.04776	0	0	0.0382669	0	0	0.690308	0.524716	0	0	705.796	722.359	698.211	674.852	689.711	575.174	597.312	585.806	566.012	536.725	531.886	406.85	426.102	376.901	396.505	375.414	354.98	335.511	379.028	396.401	354.002	2189.58	168.171	489.564	1237.37	460.144
2.57_283.1045m/z	283.104	2.57377	0.591386	0.0570644	0.0869468	0.0881109	0.843881	0.587522	0.876412	0.0168388	0.351864	0.218793	0.558346	0.000353174	0	0.104108	1.32179	0.399008	0	0.510691	0	0	0.0807814	515.71	501.248	488.891	518.329	512.966	474.442	478.967	447.606	450.651	425.878	424.914	319.569	267.044	254.675	273.831	253.108	247.772	246.28	242.541	271.652	238.87	1043.54	17.541	441.259	742.322	456.125
1.00_895.3361m/z	895.336	0.997683	0	0.864899	0	0.307251	0	0.265598	0	0.681779	0	0	1.22154	0.522919	0	0	0	0	0	0	0	0	0	350.967	335.034	383.789	348.852	357.864	309.813	287.727	259.723	269.054	239.233	266.712	163.651	122.217	108.801	125.158	112.566	104.154	103.832	101.262	89.5567	102.99	525.202	68.7045	435.387	1048.57	226.438
4.33_381.1936m/z	381.194	4.32633	2.2268	0.345886	0	0.593857	0	0.337112	0	0	0.304646	0.521616	0.000142355	0	0	0	0.26062	0.492809	0	0.712433	0.341797	0.410156	0	460.416	501.093	474.403	510.675	466.48	419.547	396.356	374.203	394.93	315.413	355.879	336.88	347.384	336.96	326.388	291.707	253.563	252.594	276.339	293.548	254.093	1126.65	87.1649	337.357	802.708	498.163
0.97_482.1969m/z	482.197	0.970667	0.937719	0	0	0.20668	0	0	0	0	0	0	0	0	0	0	0	0.177704	0	0	0	0	0	104.893	98.8986	98.3169	92.9103	101.616	89.6353	80.7411	87.7351	82.4342	82.2524	77.9875	54.4665	35.7918	41.3027	49.5751	39.8977	43.9642	41.9675	40.6518	36.3783	32.0704	150.629	50.1934	75.6778	130.642	78.2221
2.41_580.5973m/z	580.597	2.41365	0	0.411804	0	0	1.3213	0	0	0	0	0	0	0	0.217015	0.357973	0	0	0	0	0	0	0	191.605	173.559	162.96	188.304	161.334	150.072	137.297	135.534	158.205	129.503	135.49	107.249	81.7203	82.5023	93.9073	80.5048	81.6433	89.2515	92.2154	71.1584	68.2954	510.211	56.1105	45.7153	227.894	111.84
4.11_551.2129m/z	551.213	4.10675	0.648062	0	0	0.730103	0.393877	0	0	1.16646	0.699799	0	0	0	0	1.38901	0.391527	0	0	0	0.0560971	0	0	454.492	443.28	453.541	428.789	425.428	346.01	319.397	322.958	318.314	266.15	290.608	275.05	292.411	251.691	262.663	254.275	226.474	235.716	247.546	239.489	231.571	1551.39	90.6692	258.115	259.872	218.521
2.80_672.3029m/z	672.303	2.79872	0	0.613037	0	0	0.495474	0	0	0	0	0	0	0	0	0	0.317535	0.382286	0	0	0	0.627564	0	200.622	220.606	172.25	195.227	173.227	166.798	155.424	165.44	169.452	123.792	142.002	86.5126	93.67	108.465	95.0044	101.12	71.2728	79.847	89.8539	92.2082	79.5464	479.524	51.8564	109.622	382.974	126.658
2.87_590.0390m/z	590.039	2.87237	0	0.396174	1.46558	0	0.0230727	0	0	0.227529	0.456665	0.585205	0	0	0	0.807129	0	0	0.116821	0	0	0	0	315.482	277.117	320.034	314.51	298.234	242.938	258.087	242.406	246.816	222.933	237.903	175.575	165.56	148.913	150.654	143.776	131.244	134.994	143.269	151.661	143.956	814.02	81.0012	186.738	406.541	190.436
0.88_416.0294m/z	416.029	0.8808	0	0.272339	0	0	0	0	0.00485824	0	0	0	0	0	0	0	0	0	0	0	0	0	0	22.143	18.4405	22.7175	14.1458	22.4117	11.578	8.92444	14.865	14.6181	9.07918	11.2771	9.67595	6.06035	5.22447	4.98932	7.61288	5.1444	4.50502	3.74812	4.6101	7.95258	48.6046	16.926	11.7558	31.5121	20.5681
1.81_245.0345m/z	245.034	1.80903	0	0	0.00774412	0	0	0	0.126854	0	0	0	0	0	0	0	0	0	0	0	0.0859843	0	0	20.6831	23.3317	19.5789	27.0185	22.6849	13.9138	16.0585	16.5904	17.5968	11.474	13.3098	7.84532	6.43409	8.30979	11.0766	10.0128	5.13495	5.94146	9.68556	7.53281	6.78857	31.6056	6.24943	15.561	28.3438	14.9645
0.92_841.1165m/z	841.117	0.922017	0	0	0.507446	0	0	0	0	1.42506e-06	0	0	0	0	0	0	0	0	0	0	0	0	0	52.344	49.4126	53.9626	54.1514	41.348	34.1707	21.432	21.7152	28.5402	20.8835	26.9529	23.0373	20.9591	21.4313	18.0995	18.8092	24.2844	21.2545	22.1967	14.7618	23.0105	51.9707	12.875	49.9967	69.5032	17.1432
3.18_671.0582m/z	671.058	3.17838	0.379211	0.803772	0.360953	0	0	1.18396	0.340409	1.45505	0.104462	0	0.283963	0	0.000626463	0	0.99646	0	0.198273	0	0.671616	0.226679	0	517.551	477.216	504.487	513.856	499.372	445.615	422.729	397.94	401.231	374.885	326.243	298.623	317.924	301.785	296.094	281.071	259.273	266.807	282.658	288.677	261.227	1467.08	136.097	200.213	551.786	377.559
1.15_493.0342m/z	493.034	1.14698	0	0	0	0	0	0	0	0	0	0	0.216808	0	0	0	0	0	0	0	0	0	0	11.5163	17.5092	18.3818	16.8048	19.4155	20.0796	15.974	15.4773	15.6569	13.9106	15.0256	8.30201	7.08036	9.93697	10.1727	7.54751	6.50945	7.61628	9.19484	5.3246	11.1835	50.5367	6.61096	7.70706	26.8849	11.6991
1.81_153.0664m/z	153.066	1.80903	3.49578	2.22139	2.19601	2.60197	3.52979	3.44921	2.57084	2.52121	1.82444	2.81801	0.973221	2.06065	1.27651	1.91457	2.44238	4.01697	1.59126	0.408041	1.51425	2.88574	0.17289	3425.52	3246.53	3159.94	3223.12	3154.88	2544.37	2426.31	2356.26	2387.13	2130.05	2186.76	1802.6	1602.86	1820.05	1852.85	1707.03	1761.9	1855.56	1861.97	1782.27	1832.56	5404.55	1980.19	1624.5	5142.78	3071.62
2.83_654.2951m/z	654.295	2.83115	1.74137	1.08014	0.79511	0.824911	0.662979	0	0	0	0.160677	1.32108	0.365422	0	0	0.185994	0	0.197212	0.421115	0	0	0	0	637.983	628.586	614.252	564.902	636.731	490.077	488.708	504.825	469.986	426.367	400.925	328.083	283.515	307.281	261.386	265.045	249.55	251.681	282.314	296.449	262.43	1641.19	242.293	300.401	766.037	251.919
1.10_269.0744m/z	269.074	1.10375	0.548607	0.319687	0.0871507	0	0	0	0.399497	0	0	0	0	0	0.408403	0	0	0	0	0	0	0	0	134.726	117.551	114.354	104.136	115.937	98.9298	96.2306	95.1993	91.7978	81.6632	83.4748	59.9208	51.7094	68.0896	63.5974	62.7461	69.0007	65.8688	69.2939	62.5546	67.7762	147.931	47.2335	78.6232	142.062	77.5705
0.85_351.9895m/z	351.99	0.848383	0	0.0108468	0	0	0	0	0.414566	0	0.262405	0	0	0	0	0	0	0	0	0	0	0	0	59.622	58.3709	58.0678	53.0941	51.5019	34.728	37.2758	40.0706	41.8944	32.7679	38.5054	22.7364	17.5693	22.0349	18.2421	19.717	12.0807	18.6851	16.1946	15.5934	20.0604	42.489	19.3716	44.9173	39.9426	18.3574
1.10_211.0709m/z	211.071	1.10375	0.23641	0.30558	0.394524	0.39982	0.109166	0.165219	0.497683	0.287846	0.00120773	1.1464	0.0885023	0.438168	0.24455	1.01529	0.681933	0.125193	0.215549	0.228405	1.42922	0.51224	0.209152	651.395	634.159	627.057	620.11	624.887	558.98	557.912	505.19	504.798	486.045	457.813	369.292	326.269	317.229	357.017	296.903	340.986	328.352	334.026	314.876	301.339	1253.44	370.237	383.845	917.795	419.174
3.39_334.2217m/z	334.222	3.39053	0	0	0	0.277632	0	0	0.383555	0	0	0	0	0	0	0	0	0	0	0	0.00550585	0	0	47.042	49.6549	51.2282	52.0828	51.4941	40.1181	34.9348	35.7501	41.5951	30.2893	41.3464	30.7193	31.3168	25.6391	27.6365	27.7611	24.4195	25.5624	29.6559	32.9749	26.3222	43.1512	4.48073	8.14943	114.988	41.265
0.86_377.8434m/z	377.843	0.864583	0	0.255096	0	0	0	0	0	0	0	0	0	0	0	0	0	0	0	0	0	0	0	30.0878	27.8762	22.5611	27.2192	25.4096	18.8652	19.8047	10.8196	16.446	12.1702	12.4466	9.01461	9.79557	9.26828	7.07448	7.90971	8.6142	7.88573	6.65305	6.07003	9.72174	39.9291	2.97166	6.41666	24.2892	21.0815
3.18_662.3041m/z	662.304	3.17838	0	0.816437	0.754486	1.36559	0.565329	1.87805	0	0.506866	0	0.120632	0	0	0	0.565657	1.47922	1.67464	0.771301	0.427917	1.11182	1.12674	0	972.745	960.445	931.962	945.512	893.793	753.011	815.224	696.146	780.154	689.314	663.866	567.316	579.662	577.289	534.538	521.395	509.461	510.836	492.733	561.649	509.506	2923.52	300.214	589.288	1394.52	603.488
4.10_380.0671m/z	380.067	4.10135	0.774614	0	0	0	0	0	0	0	0	0.230713	0	0.140793	0	0	0	0	0	0.449678	0	0	0	117.903	128.914	113.544	112.087	109.714	99.2805	85.2579	85.7335	87.1694	78.8161	84.974	81.4128	70.6931	92.3255	85.368	73.4772	58.5952	83.7009	73.5511	69.9296	65.3406	177.087	38.6498	63.0007	78.7592	79.8531
0.94_432.1728m/z	432.173	0.943633	0	0	0.373536	0.182236	0	0.624786	0	0.600449	0	0	0	0	0	0	0	0	0	0	0	0	0	121.11	118.34	115.108	99.607	87.3291	119.452	89.3579	80.7156	84.2925	69.6807	88.4765	62.7111	42.0924	51.5488	45.2199	40.6154	38.1828	43.8349	35.8683	36.7249	53.0186	182.99	124.265	61.6303	111.363	44.7595
1.21_426.0638m/z	426.064	1.21183	0	0.110825	0	0	0.223074	0	0.568074	0	0	0	0.871765	0	0.161462	0	0	0	0	0	0	0	0	181	190.238	173.352	181.086	178.457	151.172	127.345	113.636	114.084	114.366	118.469	75.9626	65.0767	70.2056	69.5173	61.4195	48.7304	56.3504	65.5187	53.2726	69.2173	412.484	59.2573	131.292	297.103	143.061
2.40_571.2598m/z	571.26	2.40285	1.27224	0	0.258609	0.407043	0.629859	0	0	0	0	0	0	0.408784	0	0	0	0	0.516822	0	0	0	0	263.948	230.132	235.346	245.947	250.244	197.313	212.031	194.56	194.665	170.213	167.472	131.049	108.183	111.942	109.981	90.5759	115.866	109.696	117.551	105.23	107.238	172.67	5.77054	648.836	1163.4	84.9685
1.05_269.1242m/z	269.124	1.04632	0.165079	0.167745	0.416868	0.322504	0	0	0.197191	0	0	0	0.205269	0	0	0.238086	0	0	0	0	0	0	0	139.828	132.342	131.518	127.146	139.377	95.4559	106.932	83.2775	92.189	81.0359	88.2917	60.0904	59.1699	59.3846	54.6964	59.5973	55.7713	61.25	60.2457	53.0014	59.1339	268.367	60.8761	89.0987	163.78	92.8284
3.28_485.5606m/z	485.561	3.28447	0	0	0	0	0	0	0	0	0	0.354646	0	0	0	0	0.211746	0	0	0	0	0	0	33.4268	47.1683	42.8299	38.092	36.8385	43.2636	33.0323	35.1531	38.018	20.9245	29.4808	16.9684	22.4834	19.1675	28.8258	13.6543	18.6625	13.7727	15.1953	15.8083	18.0429	101.252	6.87464	22.9773	81.4936	24.7374
2.55_476.4274m/z	476.427	2.54673	0	0	0.510544	0	0	0	0	0	0	0	0	0	0	0	0	0	0	0	0	0	0	37.3512	39.2022	35.8838	43.423	36.9833	34.3067	27.8996	21.0285	30.9372	28.2593	37.979	19.3564	18.4004	18.9701	20.5639	19.0782	14.8392	26.7467	21.868	18.7703	20.7433	142.596	9.11415	20.5006	71.452	33.9681
0.89_554.9658m/z	554.966	0.891617	0	0	0	0.350494	0	0	0.381653	0.350917	0	0.169983	0	0.00140272	0	0	0	0	0	0	0	0	0	104.705	104.76	87.4	112.515	116.155	64.4878	84.8281	68.6905	69.2608	61.7691	58.2004	43.9013	45.8832	60.8367	50.2241	55.359	44.552	47.0377	41.6757	34.4528	57.0044	135.713	31.1039	85.3494	106.872	46.6729
1.40_344.0595m/z	344.059	1.40437	0	0.361152	0.390167	0.161313	0.979618	0	0	0	0	0	0	0	0	0	0	0	0	0.0192578	0	0	0	165.702	162.588	170.915	160.366	154.244	116.17	117.792	130.171	113.163	98.008	102.765	70.7179	61.7038	74.1107	78.3784	62.7044	57.7898	70.6997	68.6677	63.6584	68.3752	285.35	77.0949	110.168	247.19	69.6849
3.72_475.1646m/z	475.165	3.71818	0	0	0.178046	0	0	0	0	0	0	0	0	0	0	0.0135294	0	0.31897	0	0	0	0	0	52.8557	38.254	36.8414	47.7204	54.6154	23.8894	33.6339	30.0791	32.4397	23.6948	24.6048	17.0095	13.7165	25.9079	29.2862	17.7859	20.1148	20.3424	17.9709	23.2031	14.0546	115.524	2.68134	31.8017	88.6379	34.813
0.98_806.3106m/z	806.311	0.976067	0.192829	0.275357	0	1.14012	0	0	0	0	0	0	0	0	0	0	0	0	0	0	0	0	0	117.744	115.369	132.033	130.145	133.908	143.911	119.927	101.789	110.624	96.3857	92.781	68.6648	49.6475	49.3016	54.3881	54.6015	55.5471	60.5377	45.711	49.8953	52.9909	368.144	21.4413	37.9779	338.402	70.5484
5.40_287.1992m/z	287.199	5.40048	1.68159	1.13519	1.97365	2.24905	2.69218	2.34236	1.2949	3.20345	1.56163	3.01533	0.475504	2.58561	4.60088	2.37492	4.43903	1.58725	1.0201	2.04193	0.0333249	1.15758	1.772	2430.68	2431.89	2332.27	2362.98	2308.6	2084.44	2033.87	1928.82	2013.38	1930.94	2136.04	2045.59	2083.42	2105.85	1853.58	1800.4	1826.4	1777.66	1852.62	1976.7	1855.85	2370.08	605.058	1734.11	3832.78	2402.88
1.39_182.0817m/z	182.082	1.38815	1.21549	0.771436	1.06113	0.842723	0.569773	0.853331	2.16341	0.56649	0.897927	0.100548	1.2275	0.0914001	0.340723	0	0.0858848	0.594408	1.01231	0.0739059	0.601091	0.849673	0.0740655	1022.68	1003	988.567	972.376	991.653	731.857	767.164	714.582	748.53	668.001	662.085	479.876	455.215	453.191	445.255	396.334	439.942	461.378	480.819	431.818	462.061	1842.85	462.459	875.486	1419.63	515.502
1.27_238.0728m/z	238.073	1.27467	0	0.388466	0	0.198988	0.313034	0.250612	0	0	0	0	0	0.478729	0.00123095	0.0363657	0	0	0	0	0	0	0	129.991	135.16	109.644	110.649	126.462	105.084	115.137	99.7791	83.2012	83.2133	94.1905	62.1816	57.518	60.5979	60.635	57.6705	58.4065	56.8905	55.8374	54.8884	54.5879	255.752	48.8132	95.7093	163.096	80.542
2.45_542.5826m/z	542.583	2.44608	0	0.19517	0.774658	0	0	0	0.378597	0	0	0	0.840912	0	0	0	0	0	0	0	0	0	0	160.74	169.658	156.686	159.268	161.193	127.375	142.679	128.98	126.766	104.612	114.156	86.3579	77.9382	74.5958	73.6533	58.1522	69.5595	81.3881	73.8874	66.2048	82.7818	478.06	55.6952	55.4176	222.433	126.027
4.91_456.0922m/z	456.092	4.91475	0.114217	0	0	0.235019	0	0	0	0	0	0	0	0	0	0	0	0.41828	0	0	0	0	0	60.6333	55.1706	59.9067	55.6729	58.2364	44.3744	39.4974	28.963	34.0066	35.3075	39.4334	34.0843	43.9628	44.8583	39.8421	30.0024	36.0992	30.9358	27.7617	38.5379	35.0595	48.4351	27.415	57.7577	59.9509	78.2116
2.69_549.7488m/z	549.749	2.69063	0.442053	0	1.75317	0	1.07639	1.1822	1.21635	0.224816	0.615479	1.81661	0.832527	0	0	0	0.46	0.00655742	9.34762e-05	0	0	0.350359	0	713.499	697.025	696.798	720.879	704.677	578.369	561.88	540.633	573.25	476.634	490.267	380.167	366.745	334.68	351.286	340.006	314.218	345.442	336.261	388.747	355.985	2301.31	146.153	382.824	892.809	395.732
3.18_671.5597m/z	671.56	3.17838	0	0.237885	0	0	0	0.601692	0.880692	0	0	0.365239	0	0	0	0	0.443985	0	0	0	0	0	0	189.28	171.052	164.37	177.333	209.765	137.815	160.808	148.867	152.534	128.364	122.202	97.1334	113.383	112.786	101.88	107.308	87.9603	83.8147	83.5503	103.663	92.7953	512.935	32.3851	76.5327	179.523	140.618
1.24_263.9928m/z	263.993	1.24425	0.262863	0.0052579	0	0	0.111419	0	0.112159	0	0	0	0.327515	0	0	0	0	0	0.238541	0	0	0	0	44.4555	45.5809	41.5638	42.3267	39.0039	45.5512	32.8177	30.0519	32.518	26.5407	30.8311	22.8856	26.1182	31.428	27.5244	27.9227	19.947	25.9254	20.368	18.4296	19.9805	18.3013	40.7735	34.8287	28.6348	39.5769
2.83_657.6991m/z	657.699	2.83115	0.885651	0	0	0	0	0	0	0	0	0.380798	0	0	0	0	0	0	0	0	0	0	0	111.32	101.744	87.1062	106.875	105.611	74.4378	92.4453	87.4484	88.2235	64.2871	75.0699	39.1374	41.1199	47.3185	45.5599	47.5738	31.4877	32.2273	42.9016	39.0863	46.4502	384.919	21.3871	72.3041	160.129	75.7429
0.92_782.9995m/z	782.999	0.922017	0	0	0	0.00164154	0.305908	0	0	0	0	0	0.204929	0	0	0	0	0	0	0	0	0	0	49.9621	46.0226	52.2604	57.6444	45.4892	34.496	34.4033	17.5419	22.2558	23.7408	16.6593	17.3857	23.1007	26.9676	23.1795	15.5523	13.1739	22.1627	24.1536	13.771	15.3227	48.5236	7.39317	26.9588	59.4201	15.985
0.94_227.1197m/z	227.12	0.938233	0.0623512	0.807124	0.338658	0	0.37289	0	0	0	0	0	0	0.199098	0	0	0.123705	0	0.863085	0.592575	0	0.460387	0.200622	303.526	294.251	289.76	290.376	281.062	266.679	229.99	230.8	240.387	201.929	210.481	165.565	132.386	168.567	163.552	140.41	145.359	150.913	152.97	147.103	161.416	455.735	187.256	157.189	296.899	200.118
3.23_634.3012m/z	634.301	3.22502	0.97937	0	0.307657	0.616635	0	0	1.18669	0	0	0.51566	0.887675	0	0	0.236938	0	0	0	0	0	0.477201	0	352.57	347.295	325.809	344.657	360.443	288.803	293.276	261.386	277.528	241.674	266.465	202.115	218.37	193.055	189.98	194.051	178.37	174.377	184.513	206.844	184.625	861.088	131.807	176.71	720.792	211.868
5.26_425.1583m/z	425.158	5.25658	0	0.702606	0	0	0	0	0	0.00405813	0.474678	1.14086	0.482925	0.635361	0	0	0.374734	0	0	0	0	0.437592	0.450302	281.72	299.48	279.075	293.014	283.945	238.856	225.41	234.505	228.798	212.078	230.906	236.899	230.096	225.572	208.394	210.994	216.474	183.608	206.424	224.295	212.373	532.414	90.2933	226.011	449.019	338.698
5.04_379.2105m/z	379.21	5.04243	2.38806	1.17116	0	0.107377	0.494049	0	0.400145	0.330475	0	0.843643	0	0	0.645902	0	0	1.43247	0.54538	0	0	0.856882	0	491.574	504.534	525.185	490.134	500.37	446.486	445.799	435.323	439.445	366.541	408.079	392.311	407.684	457.258	437.221	375.527	362.507	347.576	351.73	411.495	359.688	979.096	163.732	413.199	637.753	545.013
0.95_533.1864m/z	533.186	0.95445	0	0.166565	0	0.999908	0	0	0	0	0	0	0	0	0	0	0	0	0	0	0	0	0.727295	119.262	108.864	105.143	104.339	108.557	107.49	95.1274	85.9273	86.7668	85.1757	69.7317	59.4805	43.9441	53.4989	53.1894	44.3229	44.4865	46.562	42.9649	42.4022	49.4273	127.643	115.823	77.9214	99.2845	42.0894
2.86_590.5318m/z	590.532	2.86157	0	0	0.0855055	0	0	0	0	0	0	0	0	0	0.996095	0	0	0	0.166146	0	0	0	0	77.9018	66.9297	104.633	102.892	85.0233	84.449	76.969	75.3304	55.0871	50.6174	47.8905	38.1148	27.2558	51.4263	48.6998	32.1587	38.4117	34.4551	41.3462	40.5291	22.3488	263.959	19.3721	48.6541	118.583	50.8117
1.20_495.5587m/z	495.559	1.19562	0	0	0.00856562	0	0	0	0	0	0	0.574371	0	0	0	0	0	0	0	0	0	0	0	43.092	46.2132	46.862	47.9102	44.6847	39.459	35.3327	47.3187	33.4827	30.2054	30.1896	22.5133	26.0501	17.0798	19.1095	24.4551	18.7278	17.3351	18.2619	14.9402	11.5206	134.474	15.1191	23.5338	89.4925	17.9618
5.56_411.1770m/z	411.177	5.5606	3.09429	1.96602	1.7949	0	0.695314	0.647202	0.602753	0.00373838	0.748779	0.474274	0	0.948395	0.505325	0	0.0156091	0.344072	0	1.04457	0.54741	1.57097	0.840514	844.005	856.098	817.897	821.672	837.003	743.564	754.502	731.309	752.295	726.117	787.149	767.399	657.19	721.398	678.728	655.266	638.773	618.166	674.253	691.724	606.952	574.889	112.298	237.087	436.82	404.38
2.95_578.7328m/z	578.733	2.94802	1.67991	0.237877	0	0.126312	0.683655	0.736755	0	0	0.512718	0	0.483887	0	0	0.21051	0	0.47345	0	0	0	0	0	390.438	358.62	350.954	362.705	367.584	325.917	342.943	304.121	302.923	270.584	270.474	190.337	201.284	182.206	182.696	173.614	161.407	161.699	167.833	188.6	165.96	1042.87	101.62	247.934	637.817	233.286
1.01_204.0872m/z	204.087	1.00848	3.65775	1.09487	2.77435	1.57378	1.77741	1.24264	0.932464	1.32835	0.381918	0.792614	0.644629	1.70542	0.967907	0	1.2281	0.629719	0.844963	0.766389	0.533833	0.387335	0.538576	1570.58	1553.48	1554.6	1536.65	1537.46	1249.11	1315.92	1197.68	1216.02	1062.83	1105.8	826.014	777.028	773.981	800.637	691.82	728.831	730.498	767.849	711.786	721.681	2563.54	954.856	1135.22	2085.7	1116.96
6.39_318.0790m/z	318.079	6.38817	31.8025	20.594	19.9437	16.2795	21.1206	18.6404	13.9942	15.8545	24.5875	27.7448	52.7387	69.6465	45.1581	5.06322	35.0691	40.521	39.6386	28.5008	38.3357	18.0269	7.3742	10.1738	8.96278	5.39645	12.8077	5.5421	9.94246	1.98996	8.54827	4.95711	8.77828	22.0985	19.7325	15.1115	18.5738	22.0392	14.7818	10.1665	18.5053	7.68366	9.99523	12.6716	6.0149	15.47	14.5753	4.3381	10.9727
3.82_283.1286m/z	283.129	3.82425	0.1474	0.420072	0.183868	0.50081	0.224319	0.183917	0.0956083	0.108276	0.374753	0.246778	0	0.0456408	0.106644	0.389801	0.171728	0.0806343	0	0.00521727	0.022479	0.0956391	0.0408418	225.763	227.571	236.229	228.347	238.038	209.343	195.134	186.382	206.358	173.805	176.073	162.774	166.7	147.956	145.096	141.706	123.839	128.293	142.039	151.749	135.394	970.924	36.3093	193.023	295.23	89.5108
1.42_284.0210m/z	284.021	1.42058	0	0.0884399	0	0.253378	0	0	0	0	0	0	0.257587	0	0	0	0	0.196991	0	0	0	0	0	74.475	65.481	65.1058	72.0477	66.7378	49.0595	47.9175	46.9142	42.7622	33.4163	49.8734	28.3247	23.8051	27.0947	35.0767	24.6417	29.6672	26.3378	24.0599	31.3171	28.4386	93.2608	23.156	64.5906	85.3027	51.9892
6.07_358.2587m/z	358.259	6.07335	6.83444	2.19334	3.95869	4.09271	1.70444	3.24962	2.70495	2.50726	2.6252	5.23354	1.81417	2.79587	3.5152	1.16243	1.36261	1.67446	0.950542	1.1686	2.28377	3.03437	1.45947	2792.19	2725.24	2778.91	2724.99	2707.48	2625.08	2521.97	2481.98	2754.11	2686.54	2892.53	2903.65	2519.44	2750.16	2718.93	2467.65	2434.76	2342.05	2501.39	2582.71	2320.02	5203.49	799.735	985.022	6142.44	1343.1
0.89_961.6829m/z	961.683	0.891617	0	0	1.13228	0	0	0	0	0	0	0.712189	0.623718	0	0	0	0	0	0	0	0	0	0	172.528	176.646	179.582	212.893	207.743	69.058	170.694	182.707	181.148	180.962	138.741	66.7542	99.8521	93.1452	71.62	41.9824	61.8158	77.1875	57.4762	55.1168	86.4271	234.763	14.5454	187.166	292.927	128.228
0.83_298.1877m/z	298.188	0.826767	0.370407	0	0.234156	0	0	0	0	0	0.525574	0.294907	0.351379	0	0.415955	0.083252	0	0	0.143555	0	0	0	0	144.171	148.043	151.326	150.948	143.786	132.219	132.602	134.561	134.032	115.688	117.382	86.7901	61.7685	66.5017	70.318	67.5699	57.9945	65.9724	61.7521	55.8971	59.4548	276.612	70.5487	92.5979	225.193	120.459
0.99_589.1489m/z	589.149	0.992283	0.47403	0.165865	1.27954	0	0	0	0	0	0	0	0	0.323914	0	0.368188	0	0	0.26503	0	0.743011	0	0	285.464	276.136	282.779	270.607	301.284	253.394	236.889	217.091	223.714	199.548	206.258	141.878	100.928	106.465	113.464	93.8624	112.091	83.9323	87.2193	89.4691	91.0312	455.194	149.142	208.348	352.172	234.934
3.19_553.6762m/z	553.676	3.1892	0	0	0	0	0.777308	0	0	0	0	0	0	0	0	0	0	0	0	0	0	1.47745	0	162.208	176.869	194.337	172.527	184.168	126.623	147.335	143.168	143.6	131.394	108.716	93.2062	112.745	94.2548	93.419	84.835	98.9149	94.977	95.978	106.126	109.362	444.719	71.6075	69.4786	194.728	76.3805
4.29_263.1389m/z	263.139	4.2939	0.634103	0.902941	0.152634	1.25898	0.675076	0.886703	1.11	0.793547	0.961929	0.858305	0.516176	0	0.521225	0	0.192002	1.66017	0.810671	0.177567	0	0.137351	0	669.343	730.761	683.426	679.372	674.086	640.271	585.631	556.364	594.011	490.467	515.527	468.914	497.385	494.709	477.914	438.24	398.736	399.382	423.781	430.079	379.425	1036.49	324.383	361.423	799.156	462.401
0.85_216.0151m/z	216.015	0.853783	0.940741	0.277542	0.635149	0.704172	0.128929	0.0482941	0.384981	0.278121	0	0.0891254	0	0	0	0	0	0.373474	0	0	0	0	0	323.591	306.955	307.988	305.039	295.944	221.607	245.75	232.289	225.906	211.317	201.504	142.039	148.846	143.228	124.373	103.378	107.154	127.494	127.575	115.488	134.245	253.404	190.763	216.014	357.952	94.6113
2.88_668.7031m/z	668.703	2.88317	0	0.841908	0	0	0	0.473684	0	0	0.00436441	0.336217	1.04904	0.362152	0	0	0	0	0.163877	0	0	0	0	226.05	244.332	235.675	228.637	244.501	201.731	193.505	192.346	186.077	174.414	168.394	120.367	123.973	105.728	125.077	111.28	104.246	108.886	111.915	132.785	76.4457	872.428	67.2113	128.277	275.655	109.609
3.25_736.3391m/z	736.339	3.25203	0.557712	0.682617	0.665282	1.35172	3.78689	3.20754	0.133362	3.3567	0.901062	0	2.69536	0.914001	0	0.102697	3.26331	0.854858	1.06583	1.98242	0.290347	1.25586	0	1765.63	1720.24	1657.62	1662.08	1643.66	1479.52	1481.66	1405.38	1461.83	1278.89	1335.16	1061.26	1088.21	1002.73	1017.08	978.324	922.267	941.222	967.847	1088.8	983.85	4612.1	489.024	907.041	2554.7	901.777
3.92_624.8150m/z	624.815	3.92492	0	0	0	0	0	0.467328	0.00415834	0.372253	0	0	0	0	0	0	0	0	0	0	0	0	0	47.8371	51.0781	52.2719	58.4236	42.3133	50.0824	37.0544	50.3813	22.8961	34.6702	39.6641	31.4369	27.6606	33.3096	29.4335	34.9907	26.0751	23.0282	26.9842	30.1057	17.2287	123.328	6.986	47.6467	83.4409	15.1139
0.97_261.1814m/z	261.181	0.970667	0	0	0	0.0135923	0.0313162	0	0	0	0.158159	0	0	0	0.202614	0.0612926	0	0	0	0	0	0	0	22.7242	28.1696	27.8537	29.2245	25.5306	30.1844	32.7451	25.9035	27.5362	28.754	22.6541	17.1862	10.0927	13.2607	14.3716	13.4703	14.4196	19.1124	16.1072	15.3049	13.7789	92.9125	3.76724	14.1712	96.8234	6.05729
0.88_433.9931m/z	433.993	0.8808	0	0	0	0.392151	0	0	0	0	0	0	0	0	0	0	0	0	0	0	0	0	0	37.7883	32.0553	25.9307	31.2319	25.4746	29.1393	23.3197	20.3305	21.1185	18.3484	23.9274	11.1155	13.7899	18.3809	16.914	11.2269	13.7065	11.429	8.50096	10.5849	16.0809	39.0343	7.24757	19.5218	26.5099	19.0726
1.80_203.0821m/z	203.082	1.80363	1.65073	1.39046	0.951314	0.451316	0.420082	0.323814	0.410402	0	0.345566	0	0.0403259	0.641303	0	0	0	0.2811	0.378175	0	0.458156	0.522171	0.11395	604.226	561.201	543.336	555.85	548.958	436.491	417.498	378.782	419.7	342.306	346.195	301.813	260.816	289.081	308.564	268.597	290.098	289.809	310.084	300.66	305.802	1671.37	341.834	364.519	879.155	368.504
1.11_283.0420m/z	283.042	1.10915	0.683463	0.862582	0.230536	0.320572	0.420746	0.499878	0.982849	0.617218	0.927371	0.360756	0.779066	0.83729	0.407608	0	0.168869	0.459229	0.520742	0.547928	0.499786	0	0.18364	726.555	692.801	684.196	682.755	664.38	579.423	553.985	508.946	511.473	459.194	495.918	401.623	303.881	346.341	376.668	341.108	360.825	338.737	368.564	331.837	354.441	1242.13	277.122	494.989	997.916	578.656
0.79_519.2390m/z	519.239	0.794333	0.10929	0	0	0	0	0.0571523	0	0	0.3996	0	0	0	0	0	0	0	0	0	0	0.151211	0	57.4747	49.6147	53.0286	47.6361	46.54	48.3182	46.0544	45.6973	44.1281	40.3149	43.5492	33.0721	18.804	21.0494	23.732	23.9035	23.8867	20.899	26.6123	20.5372	17.8753	137.355	12.5517	32.144	110.061	36.4207
1.04_948.3260m/z	948.326	1.0355	0.450745	0	0.30957	0	0	0.0853727	0	0	0	0	0	0	0	0	0	0	0	0.598755	0	0	0	148.278	118.168	132.492	109.808	128.269	105.762	99.1247	93.6608	91.1915	86.0612	96.7982	56.3164	44.5329	42.4255	62.2156	44.3642	42.5448	44.0915	45.4736	41.7834	44.1595	211.443	58.4716	130.068	200.743	111.225
0.89_1065.1079m/z	1065.11	0.891617	0	0	0	0	0	0	0	0	0	0	0	0	0	0	0.612976	0	0	0	0	0	0	58.9334	51.6863	54.5883	53.4975	39.194	38.0568	36.4453	37.068	38.5626	29.5052	17.6824	28.371	30.657	18.2428	20.0023	19.6668	19.3736	14.7565	26.7492	13.171	31.1038	78.67	17.8283	40.3115	51.8571	19.1413
0.86_598.8382m/z	598.838	0.859183	1.43623	0	0	0.609375	0	0	0	0	0	0	0	0	0	0.0684812	0	0	0	0	0	0.396127	0	206.65	193.756	206.055	172.65	193.681	119.701	149.583	122.279	133.104	115.304	119.788	67.5385	73.6487	85.6997	86.3833	69.2075	65.3804	70.8213	69.5716	66.8379	83.6288	181.83	17.7626	127.209	170.027	135.948
1.27_307.9839m/z	307.984	1.27467	0	0.345042	0.261488	0.938059	0.0663327	0	0	0	0.449161	0.115204	0	0.27655	0	0	0	0	0	0	0	0	0	101.818	86.7944	93.9195	87.9472	97.3607	87.2772	82.2862	73.8336	63.9066	63.4215	69.6845	50.8315	51.5943	54.4275	49.8531	45.6128	47.4401	54.6092	46.8687	44.9378	55.7244	67.9498	80.7667	86.4849	73.6293	84.0823
3.89_348.2373m/z	348.237	3.8891	0	0.325867	0	0	0	0.167038	0	0	0	0	0	0	1.01976	0	0.604114	0.326538	0	0	0	0	0.416733	208.253	209.195	192.737	199.803	183.418	155.54	154.569	141.478	145.708	120.828	128.726	125.949	128.633	130.437	126.149	114.982	100.829	106.787	110.771	115.727	105.579	281.67	19.0841	128.478	513.1	155.151
5.77_360.2739m/z	360.274	5.76933	0.0746477	0.995515	0.981256	0.121172	0.235594	0.517049	0	0.224052	1.46331	0.835826	1.21823	0.866417	0.00681973	0.249405	0.288379	0.836229	0.113499	1.43233	0.0836882	0.0552086	0.000404198	588.303	612.495	591.585	589.544	583.817	516.066	503.318	463.959	479.114	502.753	561.82	537.742	503.319	507.28	482.25	434.073	412.675	420.683	459.567	446.048	417.601	2259.6	161.546	284.548	1076	351.523
2.73_567.5153m/z	567.515	2.73387	0	0	0	0	0	0	0	0	0	0.581878	0	0	0	0	0	0	0	0	0	0	0	44.7762	38.2491	33.3417	30.7641	33.7272	31.4025	37.9719	27.881	28.4787	38.3116	26.9024	24.0211	13.6454	21.0229	24.5109	19.024	10.9028	8.6977	13.8156	21.9561	22.1295	119.445	10.4075	9.06694	44.334	23.248
0.86_406.9140m/z	406.914	0.859183	0.0417731	0.445923	0	0	0	0	0	0	0	0	0.163471	0	0	0	0	0	0	0	0	0	0	61.3285	46.2052	48.297	39.7214	50.401	31.3684	39.1706	34.3717	31.973	27.0126	34.414	16.7707	16.5007	26.6227	15.7716	15.1853	8.5142	19.068	17.5596	14.2234	20.3068	56.8647	5.83651	34.9822	41.7145	28.7268
1.47_327.0804m/z	327.08	1.4672	0.471191	0	0.027124	0	0	0	0	0	0	0	0	0	0	0	0	0	0	0	0	0	0	45.9268	37.6516	45.5857	39.7716	42.4641	30.5547	28.6716	27.6714	24.9059	22.7411	23.8904	15.2585	9.95086	20.6517	18.726	11.5345	10.5972	15.2268	12.0377	10.7769	15.1009	92.9721	11.8401	32.5777	58.0914	20.2294
1.15_307.0421m/z	307.042	1.14698	0.0978929	0	0	0	0	0	0.452423	0	0	0	0	0	0	0	0	0	0	0	0	0	0	39.1453	35.8427	36.6529	38.7895	41.7641	36.8111	34.5402	31.3023	30.6329	28.877	26.6552	22.2413	7.99942	10.5524	17.0493	10.7396	12.7427	12.0162	13.7627	17.0639	11.1077	65.2996	17.1932	28.1395	50.5669	29.5574
1.10_625.0625m/z	625.062	1.10375	0	0	0	0	0.0173717	0	0	0	0.322296	0	0	0	0	0	0	0	0	0	0	0	0	34.477	28.5021	25.2273	22.7089	28.9542	18.2451	14.3579	16.6401	18.3204	9.00082	18.3123	11.1	9.30835	13.3754	11.1456	8.9593	7.26152	9.93042	12.7812	8.28394	13.4251	30.7912	12.6748	13.9815	28.5642	21.8724
0.83_265.0238m/z	265.024	0.826767	0	0.0995483	0.312866	0	0.244791	0.384317	0	0	0	0.159475	0.327087	0	0	0	0	0	0	0	0	0	0	71.1853	74.2243	79.7575	76.8891	72.7149	70.5663	62.9606	68.6138	65.5538	60.6886	57.4548	52.207	61.5342	39.878	38.241	40.9898	40.3472	31.5941	40.185	38.7455	37.3391	48.2233	42.5832	61.3216	67.9407	42.5363
3.43_479.5620m/z	479.562	3.43377	0	0	0	0	0.431213	0	0	0	0	0	0	0	0	0	0	0	0	0	0	0	0	22.3643	28.9888	32.6092	20.2012	28.8724	24.6589	32.1788	15.5654	25.4786	14.937	22.3392	16.0831	11.8339	10.9112	18.6618	8.64135	8.47346	13.4323	6.21034	13.1428	6.12423	70.7411	2.26074	18.177	24.821	13.4849
2.78_672.6377m/z	672.638	2.7771	0	0	0	0.697632	0.00894216	0	0	0	0	0	0	1.02701	0	0.284974	0	0	0	0.283813	0	0.0125011	0	149.855	171.082	160.182	145.075	153.3	140.131	134.686	123.009	105.496	105.351	123.221	73.8173	70.452	79.8893	67.1161	75.9155	68.3421	57.9629	67.1816	66.5706	64.8574	416.446	44.4228	89.2763	281.912	108.646
0.86_231.9893m/z	231.989	0.859183	0.146736	0.00796978	0.252341	0.284051	0.116835	0.374268	0.495653	0.16734	0	0.503671	0	0	0.0767517	0.428671	0.0471905	0.0586822	0	0.33866	0	0	0.366135	264.931	245.036	243.536	241.174	246.683	179.982	204.679	187.36	186.641	179.275	174.874	109.171	111.678	106.575	108.436	74.6962	86.3955	108.559	101.666	93.271	105.844	314.903	198.386	178.569	504.192	262.288
0.88_1190.2011m/z	1190.2	0.8808	0	0	0	0	0	0	1.42419	0	0	0	0	0	0	0	0	0	0	0	0	0	0	106.576	127.783	117.082	96.2184	102.218	58.7962	82.948	68.71	98.1746	57.7234	80.2335	53.3116	47.5309	71.25	39.471	24.1422	35.3301	31.4001	32.4308	24.6373	46.2039	125.125	23.7966	69.2547	133.684	42.8657
5.68_127.9590m/z	127.959	5.68287	5.12003	3.862	3.08673	6.97471	5.09333	5.49514	4.83593	6.61071	4.83503	5.07431	6.44102	5.34347	5.68875	2.02154	4.73556	4.09659	4.58066	1.62502	3.29568	1.69187	3.53257	1.91182	1.87207	1.82795	1.43608	1.85225	2.76845	2.76494	2.79915	2.37262	2.57284	1.95942	2.71454	1.30972	2.73375	3.05214	2.30932	1.68318	2.81083	0.616663	1.79131	0.883748	3.10222	2.3319	3.10268	3.4763	2.20374
3.40_363.0095m/z	363.009	3.39593	0	0	0	0	0	0	0.408783	0	0	0	0	0.19162	0	0	0	0	0	0	0	0.0363346	0	39.3646	48.5518	45.5957	42.6887	37.2215	37.522	26.9317	36.6537	34.3517	25.0269	28.6854	33.286	18.5092	25.7361	29.8093	26.0997	22.1157	19.0256	25.2819	22.1348	20.6164	59.2917	19.3857	31.7793	62.4761	33.2842
1.51_496.5666m/z	496.567	1.50503	0.0994247	0	0	0	0	0	0	0	0	0	0.155575	0	0	0	0.52652	0	0	0	0	0.120452	0	62.4852	62.6663	59.62	55.3061	55.9869	60.5648	57.7541	49.359	55.6596	45.3844	51.1296	30.3241	21.9397	33.2858	33.1641	27.9923	27.4772	36.2616	36.188	31.595	28.1679	208.281	14.0496	43.9652	86.1695	50.1688
1.42_216.0324m/z	216.032	1.42058	1.46401	0.639493	0.780793	1.27385	0.578064	0.666451	0.627443	1.31647	0.551414	0.626083	0.624359	0.74675	0	0.126921	0.59317	0.508839	0.446037	0.449743	0	0.431396	0	882.331	854.609	823.751	830.332	823.911	618.291	648.167	582.051	565.988	520.976	530.701	417.109	391.63	436.534	435.204	386.499	385.908	429.676	451.357	387.608	422.65	1386.78	331.752	553.338	1083.73	637.796
3.48_246.1703m/z	246.17	3.4824	0.809424	0.00566318	1.15141	0	0.721092	0.367496	0	0	0.366882	0	0	0	0	0.777688	0.308472	0	0	0.539563	0.730179	0.572388	0	430.478	398.85	385.024	401.374	398.269	344.777	360.97	338.22	342.873	286.738	299.997	270.657	237.212	267.43	254.792	252.061	224.59	237.197	225.292	269.012	240.963	401.614	41.4854	42.3464	266.292	629.568
1.34_268.1032m/z	268.103	1.33952	0.0515591	0.207157	0	0	0	0.295319	0	0	0	0	0	0.181479	0	0	0	0	0	0	0	0	0	53.7729	52.5925	37.6739	50.8986	56.259	44.9112	43.358	42.34	42.2978	30.1707	36.5164	23.6677	22.5636	24.8345	19.6451	21.0092	18.8148	17.2238	20.4638	20.2267	23.7548	134.907	12.2857	40.6866	92.972	35.8624
4.84_548.2023m/z	548.202	4.83908	0	0	0	0.412566	0	0.217357	0.092405	0.0445807	0.157283	0.240265	0	0	0	0.122681	0.217158	0.451271	0	0.156089	0.253605	0.327442	0	187.493	161.721	165.765	158.113	172.206	156.965	132.606	136.318	148.216	116.121	117.871	123.656	128.414	113.552	119.024	110.155	108.443	105.294	108.499	107.556	121.266	256.344	20.3852	106.679	268.61	149.936
6.11_297.2213m/z	297.221	6.10577	3.21735	2.98858	3.37121	3.33597	0.907109	3.49606	3.95518	3.50929	3.76635	1.80374	2.98458	0.854224	2.95683	0.879294	2.01539	7.45112	2.62754	1.34254	1.44091	0.887845	3.10456	2957.19	2931.6	2975.87	2972.67	2901.31	2416.68	2456.83	2301.77	2635.4	2399.26	2540.05	2420.23	2182.62	2423.4	2270.38	2157.13	2246.11	2238.85	2306.73	2333.61	2166.84	6061.43	443.873	1940.33	5399.76	3671.17
0.85_287.0516m/z	287.052	0.853783	0	0	0.338211	0	0	0.436813	0.162918	0.25533	0	0	0	0.234085	0	0	0	0	0	0	0	0	0	104.72	97.1517	100.759	100.139	91.1372	82.7614	74.209	76.8422	71.1888	57.5118	70.238	47.8508	53.4342	39.0148	37.379	29.4004	37.4213	37.6761	41.9886	31.0087	49.3725	175.25	58.4724	72.9442	122.334	52.3517
2.35_285.0836m/z	285.084	2.3488	0	0	0	0	0	0	0	0	0	0	0	0	0.340296	0	0	0	0	0	0	0	0	22.2741	18.9248	27.8767	23.4099	24.1559	19.6074	14.8871	21.4455	17.5118	9.73086	23.5917	15.819	8.50449	14.3796	11.7982	6.53742	7.45848	7.66236	11.4235	10.3571	8.26425	61.8873	4.1829	19.6386	46.7216	17.2443
5.20_358.2213m/z	358.221	5.19713	2.97475	0	0.376416	0	0	0.455564	0	0.696178	0.392838	0.558345	0.476358	0.946946	0	0	0.961135	1.79819	0	0	0.213891	0	0.94505	574.451	579.695	556.623	549.131	579.433	509.08	464.959	461.67	485.316	451.413	514.688	500.281	495.944	467.081	456.21	448.3	425.577	391.231	430.866	482.812	438.672	1576.22	113.434	384.494	1193.63	486.843
3.35_581.2679m/z	581.268	3.35472	1.12564	0	0.948181	0	0	0	0.810727	0	0.458588	0.34863	0.484647	0	0	0	1.26786	0.739269	0	0	0	0.278944	0	398.536	409.315	396.784	400.62	405.015	316.123	328.371	325.253	323.184	277.932	299.373	261.605	254.106	227.247	236.37	228.438	217.512	221.563	211.491	247.358	226.003	1020.03	73.9684	161.997	626.294	213.879
5.62_303.6334m/z	303.633	5.62003	0.484451	0	0	0.705761	0.0194288	0	0	0.243652	0	0.197002	0.081699	0	0.00237345	0	0	0	0.220795	0.174001	0	0	0	130.553	114.506	122.692	121.037	122.618	100.811	90.2801	85.7652	97.4259	83.85	104.635	86.9015	89.9912	82.7282	80.8435	74.0249	74.512	79.5798	79.6673	82.3503	70.7081	249.924	14.6234	154.929	279.437	183.447
3.24_502.9911m/z	502.991	3.23583	0	0	0.627838	0	0	0.178623	0.0128454	0.317916	0	0	0	0	0	0	0.122543	0	0	0.0281074	0	0.549484	0	115.806	114.405	114.427	114.614	104.82	101.588	107.678	70.3697	104.632	96.2131	89.4756	65.6493	46.5843	65.3238	69.4663	61.8427	62.0566	58.8666	58.5029	69.4195	61.1328	298.381	53.7575	49.8695	180.511	36.8183
4.90_523.1797m/z	523.18	4.90393	0	0.755676	0	0.510498	0	0	0.0917741	0.0292912	0.280273	0	0.145261	0	0	0.000693099	0.381949	0	0	0	0	0	0	133.787	145.9	144.194	142.813	133.66	112.023	98.8456	99.2738	103.794	71.6278	84.1892	81.1374	99.6465	109.257	66.9176	88.5162	74.5725	79.2324	64.8309	95.9826	83.5542	182.672	50.0398	106.296	188.631	142.56
5.69_139.9652m/z	139.965	5.69368	7.94986	9.19027	8.89314	12.2113	7.5527	6.85979	6.06961	7.22938	6.78359	10.093	9.89235	15.4173	13.0089	7.49237	14.8108	15.5219	11.9797	9.77075	7.66415	6.31366	6.37592	2.73954	3.65268	3.74517	3.90316	3.10478	8.80794	5.93603	5.72194	1.97356	7.06543	4.94641	11.1923	2.11011	5.4901	8.59255	3.40339	2.40146	4.16706	2.66691	4.28178	2.26732	3.76898	3.92918	4.93135	3.42202	4.1569
0.89_387.9373m/z	387.937	0.8862	0	0	0	0	0	0	0	0	0	0	0	0.0776215	0.172485	0	0	0	0	0	0	0	0	22.6985	24.4799	16.7937	23.6691	20.7058	10.7198	18.3332	17.0051	14.7819	11.152	13.9293	8.03359	8.91783	7.89746	6.67155	4.5267	4.78024	8.77088	5.10905	6.17625	6.62126	27.6368	0.737885	21.7498	50.2594	14.1456
3.65_439.5370m/z	439.537	3.64792	0	0	0	0	0	0	0	0	0	0	0	0	0	0.181436	0	0	0	0	0	0	0	11.1308	13.856	15.2589	18.3396	18.4161	10.9362	13.1276	11.6057	7.05058	9.10241	10.2099	4.40717	6.80229	2.83186	8.8088	5.68097	3.20898	3.41016	5.05982	5.32881	7.13359	43.037	1.07182	0.0194803	10.0595	6.9659
4.41_342.1901m/z	342.19	4.4128	1.18476	1.50939	1.10625	0.66018	0.384691	0	0	0	0.117264	0.177917	0.436707	0.473099	0	0	0.523155	0	0	0	0	0	1.04349	461.948	455.785	433.115	451.498	441.859	376.791	384.732	356.75	377.423	309.363	326.163	311.735	348.868	339.652	296.63	311.28	272.33	291.423	275.72	319.187	271.745	826.215	113.653	243.53	839.714	312.059
0.87_419.0225m/z	419.023	0.87	1.00999	0	0	0	0.354019	0	0	0	0	0	0	0	0	0	0	0	0	0	0	0	0	104.42	91.0654	97.9107	80.5148	98.4927	65.7459	71.8281	72.7255	64.1328	61.0437	64.4572	43.4948	42.2794	38.7861	47.0578	34.8511	32.8975	32.6211	28.8931	31.5982	42.9609	124.778	27.1028	83.6742	112.499	59.302
3.23_570.5109m/z	570.511	3.22502	0	0	0.869875	0	0	0	0	0	0	0	0	0.407043	0	0	0	0	0	0	0	0	0	97.0393	83.3529	89.1492	91.7533	96.6066	67.1944	50.8912	71.1825	56.9454	52.0335	57.713	38.567	49.5544	51.144	42.6202	39.5296	35.7013	33.0682	41.1426	39.536	52.5027	288.493	13.1385	46.056	151.879	51.0995
3.88_624.4787m/z	624.479	3.87828	0	0	0	0	0	0	0.0257204	0	0	0	0	0	0	0	0	0.447937	0	0	0	0	0	23.6549	25.3869	19.14	31.5683	31.168	39.6004	11.0079	17.6634	19.7274	24.7908	14.2327	16.6078	10.4141	17.5666	8.3584	17.814	12.0578	19.8488	12.3227	15.0144	14.6692	39.9298	4.40928	21.8176	29.6595	7.19083
3.87_313.0878m/z	313.088	3.87288	1.49915	0	0.671617	0.620983	0.674545	1.02316	0.492622	0.618543	0.464142	0.720459	0	1.28039	0.712622	0.178044	1.20231	0	0	0.309364	0.532076	0	0.402908	547.573	550.258	533.104	563.947	545.317	438.556	456.827	409.55	435.273	366.029	374.672	360.911	396.165	376.368	359.099	325.978	296.619	324.703	327.001	362.637	298.654	615.21	148.992	218.242	528.529	237.783
5.34_376.2677m/z	376.268	5.34103	0.276001	0.0601907	0.907365	0.423599	0.710174	0.575658	0	0	0.156952	0.0265758	0	0.0505097	0	0.935593	0.627228	0.250307	0	0	0.537598	0.792618	0	322.94	329.269	328.488	351.022	334.548	284.174	288.244	264.569	286.791	266.904	311.396	295.924	317.788	288.631	268.582	276.103	247.441	269.44	275.989	295.862	278.214	1105.87	57.0394	198.624	621.552	323.228
2.94_382.1364m/z	382.136	2.94262	0.423526	0	1.01629	0	0	0.539017	0.39299	0	0	0	0	0	0	0	0	0	0	0	0	0	0	167.966	181.787	163.059	170.332	172.626	131.454	148.223	133.583	141.027	112.481	123.067	84.3676	75.9457	68.5028	74.0164	59.5002	48.9407	57.4518	70.7781	84.4981	54.7427	589.585	55.2403	53.1231	295.634	123.416
2.94_605.1909m/z	605.191	2.94262	0.41764	0	0.250493	0.0168151	0	0.40918	0	0	0	0.333435	0	0	0	0	0	0.290833	0	0	0	0	0	135.258	126.094	127.556	115.565	116.733	111.329	99.4519	98.7406	103.544	82.6967	80.9196	48.0485	60.7898	51.2732	52.4745	59.0665	46.2663	45.1557	46.7443	52.9965	40.9723	303.301	23.3517	82.5665	209.201	79.0461
0.97_1091.3473m/z	1091.35	0.970667	0	0	0	0	0	0	0	0	0	0	0	0.540833	0	0	0	0	0	0	0	0	0	46.5796	43.5798	48.0882	39.5489	52.6024	35.7566	26.8458	39.5653	26.2624	35.0327	25.4631	18.3076	10.0057	16.6002	16.2857	13.5488	11.2879	16.0296	16.6964	10.0429	12.3233	88.4607	16.6385	26.2602	79.1033	25.0765
2.53_628.0392m/z	628.039	2.52513	0	0.301392	0	0	0	0	0	0	0	0	0	0	0	0	0	0	0	0	0	0	0	17.2348	21.4483	19.895	23.8803	13.1392	14.1333	25.4206	17.2867	16.4187	6.99061	13.9635	7.6428	6.33678	11.8456	6.1717	7.55356	12.4774	10.3738	7.99721	9.74071	4.83097	72.8578	8.42226	6.74801	20.9823	11.3706
4.93_269.1896m/z	269.19	4.92555	0.429273	2.22594	0.703734	0.962326	1.59518	0.486291	1.88335	1.57759	2.91687	1.20743	0.545731	0.301762	0	1.21563	0.532342	0.942234	0.657022	0.448008	0.719092	1.33542	0.375974	1090.97	1062.47	1103.97	1077.07	1063.94	903.5	874.614	859.392	874.375	802.571	829.281	760.886	895.878	906.92	801.057	779.489	722.016	750.212	755.076	840.424	794.775	1288.23	318.254	985.708	1480.55	1226.85
0.90_265.0715m/z	265.072	0.897017	0	0.0318282	0.152601	0	0	0.244631	0	0	0	0.131546	0	0	0	0	0	0	0.277939	0	0.0939191	0	0	69.7977	62.0616	61.4867	62.0823	63.7556	35.4289	42.2442	35.6607	40.2044	27.9511	32.8117	36.7862	39.0034	35.4383	30.8038	29.9451	28.9303	30.0422	33.4833	30.5325	34.9834	140.671	24.4583	43.4563	86.8285	40.5149
2.73_567.0172m/z	567.017	2.72847	0	0.32309	0	0	0	0	0.200801	0	0	0	0	0	0	0.233872	0	0	0	0	0	0	0	47.7811	53.5523	59.765	41.4562	31.007	55.6301	35.5235	43.8615	38.1731	26.6807	26.3786	15.3651	17.2962	23.2265	27.1836	16.3351	20.8806	15.333	12.0614	19.9395	18.0255	129.129	15.0064	16.5582	56.7531	41.1649
0.86_998.6775m/z	998.677	0.864583	0	0	0	1.25677	0.0179554	0	0	0	0	0	0	1.00171	0	0	0	0	0	0	0	0	0	162.642	163.534	142.775	180.374	173.87	104.081	107.375	95.7174	124.085	98.3898	101.251	76.4583	85.652	82.0408	52.5457	55.0033	58.0043	75.1111	62.5573	60.424	78.1324	179.861	16.5828	135.86	235.596	95.8026
3.23_304.1694m/z	304.169	3.23042	1.16626	2.35016	0	1.3648	0.440687	0.580154	2.4631	1.44852	0.893204	2.92748	1.02541	0.901114	0.564316	3.99889	1.64493	1.51592	0.350449	0	0	0.580561	0.225399	1413.72	1411.4	1389.27	1403.3	1351.79	1186.14	1173.25	1160.15	1167.51	966.294	1027.92	893.92	850.916	821.867	859.658	786.73	763.85	750.744	788.507	879.489	776.752	2942.58	431.533	765.028	2618.15	923.057
0.90_868.9448m/z	868.945	0.897017	0	0	0	0	0	0	0	0	0	0.354553	0	0	0	0	0	0	0	0	0	0	0	32.0673	31.092	20.9264	21.6688	29.3943	25.3127	24.36	15.8047	9.01107	9.47176	11.6779	7.34726	11.0724	15.4722	9.83902	7.22369	8.37808	12.106	13.5008	9.33647	10.2495	30.5856	2.98688	18.6424	26.3162	14.0859
2.53_504.7307m/z	504.731	2.52513	0.123563	1.07224	0.72141	0.0821039	0	0	0.672554	0	0	0	0	0	0	0	0	0	0	0	0	0	0	176.043	174.067	171.208	147.688	152.618	124.756	123.126	112.867	135.618	107.768	103.931	84.8865	67.6544	78.5197	76.9201	76.9411	73.4032	78.155	80.3886	75.9847	74.16	400.415	47.0488	76.2052	301.829	106.173
3.97_408.7089m/z	408.709	3.97367	0	0	0	0	0	0.0652197	0.393219	0.37848	0	4.50125e-06	0	0	0	0	0	0	0	0	1.30408e-05	0.0029505	0	49.5268	46.7094	52.2186	43.9616	49.8576	42.3614	36.3157	31.4321	37.279	31.3023	36.2652	38.4928	40.576	31.6353	33.4407	28.6566	23.0091	28.1787	27.3926	33.7598	21.4128	137.755	20.6797	25.8202	48.9699	16.064
2.80_642.8914m/z	642.891	2.80412	0.342683	0.469777	1.61835	0.141004	0.504514	0.946362	2.56693	0	0	0.828345	0	0.101202	0	0	0.941864	0.836205	0	0.282684	0	0.147283	0	579.234	588.437	594.779	545.309	564.882	477.732	463.564	456.985	452.88	379.794	401.009	298.057	306.418	282.718	267.292	253.033	249.335	235.364	252.542	304.443	285.143	1601.45	138.546	336.198	916.862	379.452
2.76_302.1604m/z	302.16	2.76088	0.910567	0.585312	2.23134	0.539902	0.294692	1.10658	0.700879	0.00479145	0.27034	0.620676	0.516724	0	0.353348	0	0.121765	0.737808	0.374153	0.69194	0	0.359071	0	697.564	646.631	659.648	652.74	655.639	521.784	556.658	520.959	534.458	451.485	498.177	358.318	340.568	309.094	336.735	306.173	303.297	292.587	310.585	363.289	302.045	1547.08	277.43	291.809	1710.32	450.217
0.92_620.9911m/z	620.991	0.922017	0	0	0	0.348663	0	0.341538	0.983569	0	0	0	0	0	0	0	0	0	0	0	0	0.463074	0	181.861	160.976	165.48	163.502	157.501	113.938	111.869	117.594	91.9258	85.128	94.1237	63.3637	77.6417	82.01	83.9185	54.0476	57.2616	68.7017	65.9408	53.6245	85.9115	168.442	76.5759	80.6393	139.858	54.5616
1.70_448.1568m/z	448.157	1.69757	0	0	0	0.027832	0	0	0	0	0	0.367429	0	0	0	0	0	0	0	0	0	0.504501	0	63.6811	60.4921	67.0344	67.3019	57.9044	60.0717	52.7364	51.7376	49.2039	49.0106	44.2368	31.222	24.3854	24.4965	20.4576	22.1039	24.4313	25.7544	19.5945	20.57	27.2239	111.011	23.9264	46.6833	86.3216	52.9652
3.42_704.5755m/z	704.576	3.41755	0	0	0	0.333354	0	0	0.379812	0.890957	0	1.16135	0.371094	0.707916	0	0	0	0	0	0	0.121387	0	0	202.44	222.926	202.008	217.985	194.287	178.789	159.786	165.071	178.434	166.237	144.095	118.234	144.39	131.582	110.175	128.999	103.38	126.309	124.136	115.957	116.643	581.665	34.0456	166.803	224.55	157.789
1.03_269.0272m/z	269.027	1.0301	0	0	0.0497942	0	0	0	0.00237102	0	0	0	0	0	0.280484	0	0	0	0	0	0	0.230661	0	51.0302	38.4648	42.0644	49.6077	50.5801	32.6951	37.1792	31.6968	32.7648	30.4846	35.1483	19.3158	22.332	18.193	17.5786	13.0513	15.6523	16.4701	14.9856	14.8617	15.6376	77.4275	23.2505	34.4926	70.797	31.9665
0.84_467.0919m/z	467.092	0.837567	0	0	0	0	0	0	0.392273	0	0	0	0	0	0	0	0	0	0	0	0	0	0	24.8804	34.66	25.7696	36.8636	25.7248	31.7516	22.6138	24.1418	23.5245	18.5707	17.753	16.8432	8.12261	6.41705	8.53834	9.98299	8.45837	7.66464	8.33178	7.58604	6.08413	59.4498	7.52858	14.6437	40.5424	6.29315
0.86_358.8348m/z	358.835	0.864583	0.0003548	0	0	0.1771	0	0	0.0121246	0.0413163	0	0.380905	0	0	0	0.173965	0	0.0248691	0	0.373001	0	0	0	75.0713	71.7813	66.2246	66.9373	78.8505	45.9624	52.5511	42.8531	46.8539	40.1182	34.4796	31.4022	24.0096	37.772	27.3979	21.4034	25.7118	27.6565	26.4296	20.939	23.7386	27.049	12.6237	131.576	68.6269	147.474
1.59_535.7370m/z	535.737	1.5915	0.0880525	0	0.0179788	0	0.52179	0	0.111312	0	0.180504	0	0.525574	0	0	0	0	0	0	0.181946	0	0	0	97.0862	107.506	115.941	103.485	103.395	86.455	86.6255	70.3718	64.2784	66.1058	76.6482	49.0416	44.7172	42.2852	47.5075	42.0932	42.9832	51.9298	54.1139	48.0023	37.2495	301.122	24.45	63.4147	170.134	56.5626
3.24_598.2821m/z	598.282	3.23583	1.38404	0.035412	0	0.774384	1.95465	0	1.2635	0	0	0	0	0.710297	0	0.293588	0.0891333	0	0	0	0	3.30454e-05	0	335.582	338.546	325.542	339.633	329.367	312.279	278.414	273.915	299.62	230.174	262.799	198.626	216.607	197.033	197.624	198.764	191.42	183.788	187.088	200.272	171.777	812.574	90.6399	172.568	610.011	223.034
1.18_199.0472m/z	199.047	1.18482	0.984047	0.315301	1.7595	0.418024	0.545098	0.244451	0.49814	0.499063	0.509476	0.627433	0.299616	0.253617	0.252747	0.0166742	0.215169	0.507587	0.0521417	0.351382	0	0.0971372	0	356.171	354.873	355.77	352.9	356.842	315.632	318.982	294.639	300.352	271.235	280.009	216.922	195.136	190.636	179.191	171.353	164.315	189.319	195.478	154.489	177.615	381.944	208.298	374.535	452.318	258.872
0.90_913.0462m/z	913.046	0.897017	0.403046	0	0	0.641968	0	0	0	0	0	0	0.646637	0	0	0	0	0	0	0	0	0	0	153.361	124.379	117.155	136.29	129.874	94.4792	78.6903	62.8017	61.2777	54.6643	62.0434	60.4592	65.9444	64.1283	56.3947	31.3967	37.8586	67.9435	45.0736	45.1037	63.2263	149.602	23.1794	80.997	150.517	35.214
6.39_168.9838m/z	168.984	6.38817	12.4957	6.7766	10.5033	9.96887	9.72542	9.5269	3.40874	9.6262	15.1602	11.6577	22.8035	32.9581	18.4895	10.7606	20.008	27.4809	20.8058	21.3092	25.6725	9.20651	4.60339	8.8941	4.86442	4.51175	8.16208	6.89251	5.47381	3.93334	6.19871	3.60936	2.96731	8.5393	13.2048	15.7331	9.8791	13.36	7.14581	5.4396	8.00044	3.54299	5.47629	12.6692	3.12748	13.5712	17.007	4.62332	9.20776
0.89_203.0533m/z	203.053	0.891617	4.79233	6.07269	6.29228	3.38538	2.60724	1.6906	2.53874	0.929449	2.48718	0.911956	1.77497	1.00555	2.50029	0.830404	1.61082	0.850459	0.847367	0.955795	0.897369	0.593456	1.55981	2149.05	2047.47	2092.73	2083.27	2047.47	1516.36	1629.01	1443.69	1418.41	1250.65	1236.33	1145.41	1325.35	1232.79	1157.29	1034.77	1076.03	1195.65	1130.27	1097.33	1213.09	567.044	1699.09	2125.26	1745.71	564.33
3.45_159.5907m/z	159.591	3.44998	0	0	0	0	0	0	0	0.0805359	0	0	0.490481	0	0.441795	0	0	0	0	0	0	0.0963898	0	13.1276	15.1693	15.9694	14.66	17.1713	11.5353	7.19741	12.7468	13.4809	12.5122	11.8449	8.26171	3.26853	5.38115	5.00346	9.4102	3.86928	5.59049	2.07029	4.72708	4.16327	0	0	0	0	0
0.90_767.0117m/z	767.012	0.897017	0.67868	0	0	0	0	0.467789	0	0	0	0	0	0	0	0.374213	0	0	0	0	0	0	0	126.897	123.736	116.752	125.105	127.588	101.348	72.3711	61.1746	64.6051	48.8344	54.5236	45.3694	63.1649	58.832	48.3604	27.8969	39.6308	45.2001	46.5309	33.497	60.7909	114.033	15.0111	57.8379	110.136	29.5153
2.74_378.1396m/z	378.14	2.73927	0	0.361145	0.00304773	0.385474	0.377169	0	0	0	0	0	0.804329	0	0	0	0	0.336319	0	0	0	0	0	145.89	137.718	147.977	143.902	134.968	131.059	128.712	131.011	126.363	101.762	103.87	90.4959	70.7252	65.1071	74.5548	75.2255	55.9876	65.022	68.1719	75.0143	54.4256	403.878	81.0015	36.7764	717.586	36.553
0.82_389.0688m/z	389.069	0.82135	0	0	0	0	0	0.115742	0	0	0	0	0	0	0	0	0	0	0	0	0	0	0	10.7438	12.7116	10.7618	11.3235	9.35652	9.19697	7.11177	6.53645	5.76595	4.16872	7.30149	1.70711	3.79071	0.555969	2.13399	4.16205	2.05837	1.30972	3.15907	3.36788	1.18593	40.6389	1.70421	10.2742	15.6721	4.68007
4.13_590.1419m/z	590.142	4.12837	2.51837e-05	1.33101	0	3.05603	0.00811055	0	0	2.69821	0	0	0	0.691745	0	0.761674	0.611084	0.600745	0.455877	0	0	1.52529	0	399.842	447.052	422.68	422.862	421.23	405.44	354.245	358.025	339.755	297.005	340.989	306.439	233.636	268.962	255.302	233.476	200.031	187.504	233.701	233.713	199.059	235.277	19.0393	26.0002	88.976	1007.78
0.87_433.0911m/z	433.091	0.87	0	0.254639	0	0	0	0	0	0.565771	0	0	0.0599442	0	0	0	0	0	0	0	0	0	0	48.0413	47.7128	38.7989	40.3604	43.2549	36.8828	42.2656	28.9895	24.2342	31.3291	34.9499	18.7168	21.0048	18.4705	19.6777	17.0855	13.6295	19.8727	15.3717	13.9426	18.917	42.2047	11.3255	39.9922	23.8243	6.95717
4.29_379.1369m/z	379.137	4.2939	0	0.0590641	0	0	0	0.98429	2.13305e-05	0	0	0.289197	0.272461	0	0	0	0.290481	0	0	0	0	0.527893	0	133.723	136.631	136.325	137.826	126.396	130.369	111.586	111.089	115.364	103.411	94.7908	107.123	112.507	103.936	94.7867	98.5595	85.9859	91.5891	96.1339	99.2909	84.5841	224.894	34.6842	139.546	244.586	124.174
1.00_495.0258m/z	495.026	0.997683	0.457024	0	0.31189	0.0287905	0	0	0	0.403401	0	0	0	0.223923	0	0	0.398834	0	0	0	0	0	0	76.6682	74.6963	78.6113	72.9498	87.8382	69.4082	61.6309	66.936	50.8706	48.57	59.6585	36.4846	37.4218	36.9061	39.8243	33.2826	31.3741	32.3499	31.029	30.4312	34.1578	75.1196	136.124	63.1324	63.8482	28.2177
0.88_1130.6772m/z	1130.68	0.8754	0	0	0	0.808655	1.13251	0	0	0	0	0.661133	0	0	0.743219	0	0	0.0167705	0	0	0.257324	0	0	224.405	250.26	240.207	258.42	235.736	152.654	195.129	140.715	191.102	144.551	151.485	64.7645	121.351	124.502	117.458	76.1206	93.8445	111.849	117.753	90.7948	118.725	321.212	28.2852	237.837	271.235	146.398
2.92_585.6861m/z	585.686	2.921	0	0	0.565478	0	0.0475548	0.439362	0	0.328278	0	0	0	0	0	0	0.0258075	0	0	0	0	0	0	96.6785	121.581	99.9536	87.4621	93.4776	53.9967	76.9856	67.1605	57.8651	63.8993	63.4425	46.5067	22.281	32.2649	25.4951	41.8671	25.7057	18.5616	41.6946	42.4847	35.8616	198.98	14.4097	14.8532	80.0183	24.7926
4.71_325.1770m/z	325.177	4.7114	0.331354	0	0	0	0	0.480736	0.353849	0	0	0.739506	0.406036	0.567459	0	0	0.543671	0.252533	0	0	0	0.639588	0	239.324	227.1	222.433	206.233	224.992	190.214	203.149	183.875	182.662	160.715	160.287	157.858	165.834	177.855	138.897	145.18	133.496	132.758	136.735	149.47	129.892	219.546	58.7051	161.519	272.043	265.804
0.81_333.0779m/z	333.078	0.80515	0	0	0	0	0	0	0	0.47143	0	0	0	0	0	0	0.287582	0	0	0	0	0	0.0900912	45.6236	43.6202	46.805	46.6987	48.9103	51.6515	52.0067	51.9517	48.6396	41.8396	42.0212	28.5351	16.9426	19.8737	28.8074	28.2097	26.7462	24.1094	24.6053	23.2887	24.9523	90.8709	14.5617	37.8045	59.0582	29.3604
5.86_127.9591m/z	127.959	5.8646	2.4432	1.52271	1.18397	2.54702	2.24675	3.21474	2.58555	3.00983	3.46258	1.9764	3.38597	3.9306	2.82553	2.63106	2.61317	3.10323	2.40779	1.92208	3.40455	2.94808	1.02566	0.616296	0.955497	0.600892	1.73798	1.21154	2.42982	2.27467	2.99765	1.84759	2.47012	1.7182	0.302411	2.55494	1.35717	0.80499	2.19032	0.268835	1.09809	0.386104	0.87373	0.654999	0.387673	1.40751	1.82156	1.19113	1.26274
0.88_768.2577m/z	768.258	0.8808	0	0	0	0	0	0	0	0.616852	0	0	0	0	0	0	0	0	0	0	0	0	0	38.5451	42.1974	58.5402	51.1215	43.4397	32.5973	39.6387	34.6002	39.4817	26.938	19.3805	15.982	9.22386	19.9921	16.2079	10.7952	8.88577	17.6462	11.2947	18.1671	20.7484	60.7279	2.92507	21.8198	41.1791	12.6194
0.85_1176.1975m/z	1176.2	0.853783	0	0	0	0	0	0	0	0	0	0	0	0	0	0	0.650452	0	0	0	0	0	0	51.4119	50.7662	51.608	44.5011	38.4359	20.9224	43.4291	29.2091	23.6468	14.8917	18.7321	15.1477	9.78073	14.6301	27.1324	30.1093	25.7296	27.2696	25.9231	35.2848	16.0563	69.1002	3.52112	41.0489	50.6258	27.8709
1.10_155.0458m/z	155.046	1.10375	1.80063	2.18174	2.73199	0.758728	2.06947	1.42214	1.18462	0.347468	0.561926	2.45745	0.642101	0.917023	1.19316	0.236834	1.13102	1.52711	0.56886	0.0128873	0.652545	0.689	0.228519	1245.97	1184.58	1178.95	1160.62	1147.61	977.21	949.399	890.336	887.234	821.924	839.002	710.705	620.294	681.24	696.906	639.841	649.011	649.842	704.032	633.921	660.523	1598.79	629.977	986.101	1499.84	873.751
0.90_840.9357m/z	840.936	0.897017	0	0	0.0941613	0	0	0.260254	0.521122	0	0	0	0	0	0	0	0	0	0	0	0	0	0	62.9226	62.5143	53.0278	79.8742	85.1621	47.8648	52.5874	33.9913	33.1077	28.0392	23.744	20.5752	31.6171	36.2249	30.3215	12.7541	15.55	36.6324	25.7527	19.7517	27.1361	40.9012	7.22372	33.9024	92.7549	30.1165
3.13_765.3490m/z	765.349	3.12975	1.51354	0.905704	1.1246	2.07486	0	1.42324	1.29477	0	0	1.57445	0	0.388662	0.000240436	0.532168	0	0.217529	0	0	0.278259	1.4518	0	695.141	708.575	701.383	722.627	724.26	635.787	638.671	583.39	625.433	493.411	559.561	450.281	443.663	401.592	400.037	376.337	384.028	384.765	396.918	454.972	383.741	2392.75	178.128	515.929	1157.27	426.55
0.83_159.1498m/z	159.15	0.826767	2.71659	0.287846	0.520752	0.0279046	0.31306	0.392177	0.243596	0.648929	0.127849	0.446754	0.32193	0	0	0.298212	0.0161637	0.707521	0.536199	0.233523	0.523711	0.105468	0.2324	516.701	524.013	516.749	495.389	531.602	465.82	486.656	446.641	460.721	424.841	423.926	330.138	256.69	251.43	252.904	248.992	240.914	248.501	245.484	233.542	240.407	1090.61	218.974	446.981	715.779	305.89
3.25_346.0356m/z	346.036	3.24663	0	0.977573	0	0	0.00868857	0.343506	0	0	0	0.582794	0	0	0	0	0	0	0	0	0	0	0	110.09	113.289	103.405	112.088	95.6779	117.004	101.905	106.961	115.113	78.6709	97.9999	63.2234	44.6926	60.5974	52.8094	60.9947	46.3406	46.1928	50.4587	56.9997	51.4407	235.019	20.3018	99.9121	111.883	21.1313
0.88_201.9343m/z	201.934	0.8808	0.473558	0.690826	0.106966	0.300961	1.12482	0.611132	0.824598	0.326042	0	0	0	0	0.10247	0	0.837321	0.0189388	0	0.18525	0	0.109245	0	252.573	228.019	238.255	229.668	222.577	152.46	179.499	153.133	162.574	138.363	141.158	101.265	132.451	135.793	124.048	115.31	126.099	129.237	127.913	127.037	137.19	68.147	132.96	259.249	97.7162	513.379
0.86_908.2559m/z	908.256	0.864583	0	0	0	0	0	0.870117	0	0.4021	0	0	0	0	0	0.914642	0	0	0	0	0	0	0	137.912	137.976	151.393	142.281	134.26	80.315	105.41	104.915	111.326	89.4304	88.7315	52.2109	71.0502	77.343	74.872	42.3412	47.3417	80.4312	51.5985	70.3499	67.252	223.325	37.935	96.2071	182.949	108.235
2.96_419.1420m/z	419.142	2.96423	0	0	0	0	0	0	0	0	0	0.37616	0	0	0	0	0	0	0	0	0	0	0	33.327	31.2812	28.5923	30.1809	30.7206	19.1748	17.3588	22.5164	14.0597	16.9649	13.643	14.3473	11.6023	7.13844	17.112	3.3885	6.23679	3.9993	8.76757	10.2676	6.66573	88.9471	2.80911	7.33508	56.7647	20.1225
1.18_369.9846m/z	369.985	1.1794	0.00401056	0.194656	0.655762	0	0.160887	0	0.202148	0	0.484177	0.335357	0	0.0886845	0.395767	0	0	0	0	0.244263	0.0926514	0.00246815	0.088219	106.617	101.076	108.825	107.87	107.217	94.7559	95.9636	74.7845	69.1173	67.1284	73.4687	50.9256	40.7731	44.4682	37.3642	42.6362	37.2121	37.7176	35.2169	26.6948	36.7597	46.3705	90.0223	186.008	123.191	111.141
1.02_373.6695m/z	373.669	1.0247	0	0	0	0	0	0	0	0	0	0.163948	0	0.0737534	0	0	0	0	0	0	0	0	0	23.5394	22.0938	19.4435	20.4455	19.9993	16.4626	13.575	14.736	9.18579	11.5911	10.5159	6.40744	3.70751	3.88634	3.33203	4.69019	1.71955	3.50153	7.20651	6.90819	4.1642	49.2431	5.44649	4.48482	44.9949	11.3316
1.83_262.1652m/z	262.165	1.82525	0.436395	0	0.41145	0	0.294819	0.500223	1.37615	0	0.872311	0	0.300583	0.527466	0.390539	0	0.0190829	0	0	0	0	0	0	253.912	238.784	244.512	243.393	236.833	214.862	215.163	211.047	207.76	182.396	180.97	156.209	117.136	153.925	142.916	142.342	138.374	139.442	144.204	136.462	131.614	369.948	107.397	93.7972	462.701	173.157
1.10_264.0531m/z	264.053	1.10375	0.443558	0	0	0	0.367124	0.646088	0	0.832431	0	0.133642	0	0	0	0	0.00683576	0	0	0	0	0	0	170.765	140.717	142.67	145.303	151.036	118.208	102.09	96.1047	88.1472	91.2566	100.323	77.0195	56.1288	62.5082	64.9565	54.8838	67.1831	68.6012	64.8795	54.2301	64.265	219.747	72.2492	110.524	184.688	105.856
1.01_199.0679m/z	199.068	1.01388	0.729721	0.948203	0.327837	0.177071	0.232862	0.184617	0	0.212914	0.164154	0.685177	0.516982	0	0.399577	0	0.270999	0.204936	0	0.253372	0	0	0.0652466	277.549	244.629	268.021	262.366	253.77	240.644	232.12	225.551	227.76	196.278	214.448	158.346	135.197	122.38	125.663	118.113	117.489	120.679	120.325	119.804	126.02	349.711	113.849	194.337	303.638	594.394
0.88_786.7957m/z	786.796	0.8808	0.716736	0	0	0	0.601135	1.68005	0	0	0.0277616	0	0	0	0	0	0	0	0	0	0	0	0	193.549	193.576	196.239	200.19	179.978	127.451	152.228	126.389	131.729	118.693	125.189	72.5093	74.7253	81.3484	99.5701	65.145	69.4322	95.1838	95.8281	79.441	92.5882	223.615	29.9592	130.02	224.424	115.861
3.24_708.0736m/z	708.074	3.24123	0	0	0	0	0	0	0	0.17629	6.44977e-05	0.269973	0	0	0	0	0	0	0	0	0	0.780304	0	71.3926	72.4339	64.1198	85.7069	73.4423	65.5659	57.4107	49.2635	49.9438	38.8313	50.6888	36.9804	44.144	36.2131	44.104	38.5056	44.014	33.6101	40.6262	40.3074	39.8572	232.09	11.8788	41.9641	137.605	53.9409
0.90_602.0087m/z	602.009	0.897017	0	0	0	0	0	0	0	0	0	0	0	0	0.478511	0	0	0	0	0	0	0	0	39.3884	33.7575	32.6558	39.5031	46.4682	22.9272	20.7092	13.2779	18.7072	18.3113	18.6074	11.6328	17.5025	18.0655	16.5671	11.7791	14.1246	13.9402	6.64654	12.9697	13.7414	43.0758	11.114	55.6311	40.2508	10.9013
2.87_468.7301m/z	468.73	2.87237	0.558167	0.161194	0	0	0.597658	0.444641	0.618825	0	0	0	0	0	0	0.14682	0.420382	0	0	0	0	0	0	176.32	154.06	161.633	163.636	186.378	143.236	152.223	139.068	133.453	120.099	114.112	100.921	80.0323	94.5644	94.0147	87.4704	78.0449	67.9934	85.5632	101.907	79.7494	477.943	64.6203	68.1399	300.511	97.2679
0.90_473.9503m/z	473.95	0.897017	0	0	0	0.183751	0	0	0	0	0	0	0	0	0	0	0	0	0	0	0	0	0	11.7123	6.02098	10.166	18.3687	9.6627	9.33399	8.23695	7.05551	6.638	2.0805	3.5846	2.9125	6.67952	6.98237	6.11955	4.41198	4.99228	5.62266	1.98815	3.95572	2.22345	9.90521	1.18768	5.83282	19.3775	9.87437
0.92_818.9523m/z	818.952	0.922017	0	0.568927	0	0.463654	0	0	0	0	0	0	0	0	0	0	0	0	0	0	0	0	0	66.9198	71.2407	67.3056	75.0866	72.7386	47.8968	52.1047	47.8025	44.1451	37.9875	29.6561	28.807	33.4636	37.542	33.6137	16.485	24.4933	31.6869	27.326	23.7982	38.4345	73.0271	4.83113	44.5479	84.2279	21.7276
0.86_954.7285m/z	954.728	0.864583	0	0	0.741863	0	0	0	0.738372	0.654449	1.14764	0	0	0	0	0	0	0	0	0	0	0.540192	0	224.901	240.768	235.377	192.635	233.171	140.002	188.553	158.879	169.742	122.395	133.877	87.4028	86.8231	122.372	103.398	74.2701	96.3877	88.9923	92.5983	93.8781	101.461	265.028	31.9097	214.274	259.459	127.29
0.88_1117.6767m/z	1117.68	0.8754	0	0	3.15198	2.05847	1.82012	0	0	2.10344	0.761719	0	1.92401	0	0	1.09021	0	1.05863	2.52584	0	0	0	0	1119.55	1057.44	979.778	945.275	992.276	698.381	672.878	689.34	737.475	689.769	675.804	432.113	460.732	520.787	462.771	339.687	385.354	456.459	460.578	404.131	470.098	1090.79	130.487	1004.44	1168.52	675.524
0.90_263.0154m/z	263.015	0.897017	0.203604	0	0	0	0.213007	0.0712744	0.173816	0	0.400314	0.0034269	0.187219	0	0.382675	0	0.191299	0.0708008	0.188095	0	0	0.21931	0.120361	138.054	133.445	136.031	125.952	125.263	100.027	105.185	89.1426	94.6953	90.9192	82.7532	70.0864	74.9967	73.7433	67.7645	63.9399	60.1817	70.3726	69.6369	57.2582	61.2613	150.592	48.8559	82.5102	114.875	32.9127
0.86_1144.6316m/z	1144.63	0.859183	0	0	0.509583	0.0104174	0.452087	0.984009	0	0	0	0	0	0.23181	0	0	0	0	0.8125	0	0	0	0.369263	236.48	199.787	198.939	198.404	211.212	122.948	177.281	156.822	163.315	168.775	156.657	105.237	129.45	113.339	100.385	75.1363	98.4998	109.507	92.0936	78.0197	102.218	217.074	25.8363	219.052	281.378	137.914
0.87_588.8219m/z	588.822	0.87	0	0	0.845706	0	0	0	0	0.829437	0.846498	0	0	0	0	0	0	0	0	0	0	0	0	188.751	177.516	162.357	173.632	180.516	116.729	130.298	124.068	126.118	116.919	111.775	60.9743	52.402	81.5994	74.3974	46.3606	64.8181	59.152	56.0161	49.5353	68.5665	176.017	19.0695	101.366	166.178	121.128
5.86_453.7850m/z	453.785	5.8592	8.62049	14.5873	9.43198	36.8325	13.3232	7.16835	2.83627	16.0926	3.96604	11.5174	9.75905	30.5231	5.45088	2.91736	8.06652	7.45886	4.38246	9.81538	4.58333	9.243	12.2838	19.8024	14.236	19.0208	15.6319	10.9276	37.075	5.4038	1.69547	2.82124	7.70314	3.25639	2.65044	1.77441	0.488831	0.572098	0	2.89106	2.72455	1.08527	1.26486	0.984084	52.6489	22.3664	13.0225	45.3141	13.0956
0.94_238.0880m/z	238.088	0.938233	0	0	0.404442	0.412338	0	0	0.248409	0	0	0	0	0	0	0	0	0	0	0	0.379989	0	0	69.4017	71.9686	69.1899	71.4825	71.7639	69.1355	56.0361	50.6989	48.9604	41.1118	51.8579	37.5062	25.5134	31.6834	37.9217	27.3206	26.4647	25.8226	23.8593	26.7988	31.2563	86.8233	71.2347	44.8366	64.5698	55.7542
0.88_156.0427m/z	156.043	0.8808	0.984443	0.371988	1.23504	1.1857	0.439599	1.05212	1.15395	0.384403	1.19135	0.916023	0.598714	0.888631	0.244299	0.103297	0.729875	1.04168	0.650614	0.0150625	0.563114	0.199742	0.192627	587.834	558.372	602.592	573.362	582.088	372.167	534.485	483.031	491.3	443.588	419.938	256.724	452.452	439.206	424.306	359.324	391.049	435.692	441.18	429.119	455.864	1132.96	199.503	329.098	795.22	677.082
3.11_675.5586m/z	675.559	3.10813	0.499141	0	0	0.0604686	0.902527	0	0	0	0	0	0	0	0	0	0	0	0.914202	0	0	0	0	137.444	120.082	144.566	134.894	124.854	119.886	117.261	101.035	108.487	89.0318	102.051	81.3369	70.9137	73.4475	66.9688	61.3164	63.1661	60.6852	64.9198	64.5283	56.3914	362.359	41.2268	67.3846	155.532	101.886
5.22_443.1745m/z	443.175	5.21875	4.84187	2.70976	4.51847	1.33714	3.54915	3.4515	5.31184	3.46993	2.20361	3.29027	3.43473	3.5181	0.0865443	0.138329	2.69913	1.62497	0.594047	2.41276	1.35596	1.25776	1.32857	2409.22	2494.32	2398.53	2379.41	2353.86	2182.78	2055.79	2064	2085.74	1872.83	2024.18	2002.78	2058.99	2008.24	1869.61	1761.29	1728.31	1674.56	1744.65	1870.02	1744.32	3484.3	840.086	2316.55	3159.29	2404.24
4.49_276.1269m/z	276.127	4.48643	1.23688	0	0	0.370422	0.514372	0.447342	0	0	0.526581	1.48062	0	0.330466	0.346256	0.34137	0.515172	0.990351	0	0	0	0.892741	0	384.943	368.163	358.739	369.256	372.215	338.484	303.598	306.806	328.34	280.333	295.436	296.783	301.639	282.299	259.151	262.781	254.906	254.927	268.892	288.882	245.838	1124.75	139.967	203.831	519.437	182.126
0.84_637.1173m/z	637.117	0.842967	0	0	0	0	0	0.352539	0	0	0	0	0	0	0	0	0	0	0	0	0	0	0	32.1094	36.387	27.5518	27.1936	33.7143	21.1638	22.2446	29.7111	15.2453	18.4931	20.0054	13.5449	5.82604	9.70673	1.57115	2.56561	2.42075	3.69346	8.8646	3.32712	5.34592	50.8727	5.11828	32.0958	40.6321	14.2816
0.80_342.1411m/z	342.141	0.799733	0.0970459	0.458701	0.122089	0.308136	0	0	0	0	0	0	0.371933	0	0	0	0	0	0	0	0	0	0	57.4531	54.0524	54.1917	54.6606	54.1843	56.7655	50.6213	53.8795	52.4749	45.8101	53.2361	30.3453	23.7708	34.6186	35.1617	24.4476	30.6075	31.4574	25.7034	26.0861	35.5576	116.535	52.5778	43.0488	89.5399	64.1742
0.88_950.7058m/z	950.706	0.8754	0	0	0.580627	0.465515	0	2.44147	0.727997	0	0.822815	1.1871	0.220595	0	0	0	0	0.407562	0	0	0	0	0	416.062	404.027	434.699	357.644	424.495	252.992	296.926	277.071	241.178	262.955	276.986	161.84	155.102	198.513	201.813	174.938	175.363	203.343	189.804	163.737	182.992	423.437	46.0386	387.029	388.826	270.324
3.45_461.7371m/z	461.737	3.44998	0.793289	0.25408	0.00132022	0	0.713928	0	0	0.736616	0	0	0	0	0	0	0.150391	0	0	0	0	0	0	122.162	114.709	109.178	132.155	126.637	116.066	119.931	117.547	117.881	111.878	100.792	85.6096	89.7735	83.7129	88.7676	85.685	90.1776	97.6346	79.5208	115.839	85.358	196.537	45.6016	22.3736	147.565	1.36296
0.84_615.1362m/z	615.136	0.842967	0	0	0.52066	0	0	0	0	0	0	0	0	0	0	0	0	0	0	0	0	0	0	55.1054	38.0928	44.2651	43.2211	41.1394	33.8496	32.8012	22.5208	33.1009	22.2321	24.9511	18.8687	16.171	10.2809	11.0215	5.70245	6.1721	3.96516	8.65145	7.26938	5.729	60.3067	10.4758	43.8948	52.1373	17.7395
1.11_432.1763m/z	432.176	1.10915	0.297343	0.596146	1.02434	0.528198	0	0	0.246167	0	0	0	0.190979	0	0	0.100823	0	0	0	0	0.0350554	0	0	188.161	174.907	177.817	184.387	165.283	148.295	142.789	144.498	139.015	113.177	123.443	79.2906	72.1891	71.8922	85.0968	64.9509	69.8335	70.9695	69.0449	68.9861	78.1229	467.688	36.2174	110.878	316.343	168.737
2.87_301.0508m/z	301.051	2.86697	0	0	0	0	0	0	0	0	0	0	0	0	0	0	0	0.410339	0	0	0	0	0	33.5102	28.3354	32.1014	29.5104	29.3355	25.6959	23.3706	22.7577	19.5512	15.9407	14.427	12.2604	11.0526	11.0027	21.4206	7.398	10.4562	7.99328	12.5542	8.25001	8.84791	49.3459	4.32632	19.0196	41.7653	29.6818
3.26_188.0712m/z	188.071	3.26285	3.34057	1.76548	2.42092	4.81183	2.20332	0.449398	3.34586	2.37823	2.74823	2.43727	0.819909	1.17912	1.8028	0.538019	1.85205	2.82235	0.429943	1.11078	0.881498	0.757657	0.465139	1444.42	1460.56	1444.7	1452.91	1457.08	1483.48	1396.09	1367.35	1421.68	1198.49	1227.3	1093.5	913.384	864.142	944.015	903.847	835.019	806.654	810.456	922.48	807.073	2706.09	865.125	977.849	2172.07	857.445
5.54_404.2968m/z	404.297	5.54438	0	0	0.272013	0.367111	0.540527	0	0.703673	0	0	0	0	0.597061	0	0.404297	0.046034	0.0619384	0	0.519379	0.684616	0	0.399902	223.948	219.818	204.783	215.642	202.922	183.623	193.728	193.183	192.135	167.933	196.737	205.921	190.031	191.388	180.646	168.373	164.723	152.589	174.837	188.08	155.648	482.449	31.4304	172.241	303.393	207.77
3.46_623.0476m/z	623.048	3.46078	0	0	0	0	0	0	0	0	0	1.15781	0	0	0	0	0	0.728894	0	0	0	0	0	92.8423	99.5531	86.0205	86.2536	83.2426	78.8206	87.3211	76.6161	90.2595	61.7756	58.7351	63.9066	51.726	42.2355	48.3311	56.0755	40.9017	51.2601	38.8343	51.6911	56.7051	260.624	13.4055	74.094	140.782	59.4725
0.87_883.1922m/z	883.192	0.87	0	0	0	0	0	0	0	0.794041	0	0	0	0	0	0	0	0	0	0	0	0	0	52.2904	31.9419	45.3997	43.287	40.8565	25.5575	23.2891	35.1391	27.006	34.3177	37.8816	11.1028	11.0533	30.686	18.3738	8.14884	11.2671	9.98214	12.3436	18.147	20.0754	40.4311	12.1804	31.2524	59.7109	30.1059
6.39_339.0922m/z	339.092	6.38817	4.35727	2.54921	3.75388	4.70319	6.62739	3.55319	3.1117	2.02485	2.52368	5.03144	18.3146	22.013	12.5329	2.67206	12.7709	16.9038	14.0018	10.5554	6.72095	2.12997	0.475162	2.80047	5.20709	6.76048	3.1047	5.60228	4.16119	2.6892	3.40125	1.92514	1.84995	5.43383	7.89657	3.18728	2.51897	8.53728	5.05824	2.62501	5.99302	2.34499	5.28374	2.80016	5.80969	5.65578	10.1516	2.78979	3.6386
7.80_185.1630m/z	185.163	7.80418	76.0462	114.734	87.2443	33.2851	54.8355	21.0544	11.3878	8.20317	14.943	11.8356	6.33507	11.2593	4.79861	3.42004	3.60263	5.25935	8.16556	8.44938	8.28112	15.4332	2.46553	55.8012	36.3747	21.431	16.0231	21.6295	17.0109	20.6153	14.1969	13.6668	16.8762	17.7465	6.5816	7.07811	8.54488	4.87541	4.88627	15.712	4.89389	5.48523	4.85657	5.4328	22.8385	24.0177	39.7495	64.371	35.4124
5.07_361.1427m/z	361.143	5.07485	0.000692724	0.773341	0.461456	0	0.722977	0	0.530655	0	0.425186	0	0	0.323381	0.0744438	1.45533	0.805557	1.44173	0	0	0.415802	0	0	337.778	337.198	339.208	335.444	335.917	298.896	277.052	277.054	267.684	251.902	273.752	248.149	263.179	275.28	234.227	242.047	214.069	222.149	233.784	264.58	240.413	838.131	208.277	208.884	478.583	213.033
1.03_657.2325m/z	657.232	1.0301	0.267298	2.24149	2.22727	2.70642	0.149781	2.25235	2.31768	1.63785	2.33759	2.62391	0.640045	0.223907	1.00363	0	0.784607	2.01142	0	0	0.677302	0.953674	0.380981	1448.46	1403.44	1403.34	1420.46	1389.29	1088.56	1164.89	1059.47	1022.03	933.837	971.227	695.527	620.39	647.367	642.566	567.631	550.59	614.532	600.538	555.045	610.731	1917.16	774.496	1365.57	2081.54	927.291
5.62_358.2582m/z	358.258	5.62003	0.546705	0.919866	1.92485	0.291357	0.577298	0.549105	0.502039	1.50521	1.93227	2.39145	0.675532	1.21388	1.01806	0.749145	1.38088	0.737818	0.357605	0.75953	0.669593	0.298258	1.12796	897.64	889.831	870.461	888.557	877.501	751.075	732.798	712.322	753.035	762.243	838.702	811.555	776.16	766.093	711.596	650.678	667.79	638.493	736.11	706.476	678.109	2752.22	179.753	468.211	1683.83	784.501
4.21_243.1342m/z	243.134	4.20945	2.56491	1.91025	0.868284	0.924217	2.9786	1.93732	0.842328	1.74263	2.25257	1.1214	0	1.57623	0.490631	1.39944	1.5225	0.523052	0.106722	1.32147	1.4875	0.92545	0.69853	1424.7	1485.16	1466.87	1436.95	1419.71	1151.7	1195.22	1111.17	1150.38	978.961	1024.06	894.244	1054.99	966.398	879.885	858.737	769.841	837.919	876.297	861.92	806.843	3255.36	190.935	789.199	2185.79	930.809
0.89_267.0169m/z	267.017	0.8862	0	0	0	0.161733	0	0	0	0	0	0	0	0.00442352	0	0	0.208241	0	0	0	0	0	0	16.0502	14.4216	15.3466	17.9985	14.6114	10.4668	12.6135	15.7461	9.75373	10.8527	10.6854	6.39444	10.7264	10.827	9.65032	5.94099	8.61707	9.24423	5.55928	9.53185	10.0643	28.1671	3.07154	17.8505	48.1526	25.4327
7.80_246.8632m/z	246.863	7.79878	121.171	53.0126	63.6781	7.1961	26.8687	12.6353	7.14785	31.7892	5.06372	2.46176	13.0594	17.3106	3.27873	2.31757	3.68385	2.24119	3.28708	3.76242	2.76728	15.1899	11.6161	61.0208	14.7901	6.06125	5.35071	3.50686	5.88685	11.7196	13.131	24.622	14.5416	16.9498	12.6492	7.00643	5.54789	6.9795	4.52661	5.25612	4.84366	12.133	3.64375	7.39867	3.43329	5.70365	0.684286	7.69323	0.820723
3.76_448.2886m/z	448.289	3.7594	0.340748	0	0.580862	0	0	0	0	0.144738	0	0	0	0	0	0	0	0	0	0	0	0	0	62.6879	45.409	58.7921	45.7032	55.254	40.8528	44.2501	44.297	38.5784	30.2385	42.7926	35.59	29.287	33.1291	38.0148	28.1609	27.6412	25.8729	29.3324	31.9891	27.8838	122.886	18.0134	21.3861	140.938	31.3512
2.71_736.8322m/z	736.832	2.71225	0.432587	0.207214	0	0.104457	0	1.12241	1.62983	0	0.003036	0	0	0.748634	0	0	0.199698	0.803274	0.43924	0	0	0	0	312.012	288.9	280.726	328.196	289.203	222.948	247.164	222.258	229.646	207.211	198.159	174.145	147.158	145.303	153.866	133.076	140.242	129.915	158.881	171.003	124.421	908.027	91.6782	176.629	513.437	203.684
2.72_750.8350m/z	750.835	2.71765	0	0.241687	0.424211	0.120584	0.710193	0.0315558	0.469487	0.267343	0	0.358887	0.10633	0	0.183177	0.269867	0	0.691894	0	0	0	0.494207	0	235.363	217.115	221.357	204.412	206.462	192.648	206.886	205.556	182.567	168.792	161.551	113.558	115.598	104.767	102.918	99.8568	101.204	94.4384	94.7782	108.712	84.6301	901.918	40.0716	108.464	362.502	123.034
6.22_182.9658m/z	182.966	6.21725	124.2	96.2277	110.25	137.648	81.7883	76.3504	87.1185	58.8481	75.2511	82.1486	138.187	123.469	103.273	47.6307	78.3327	119.82	118.943	108.095	106.42	90.4703	91.1703	56.7944	53.5268	63.1807	72.2107	69.3423	74.2239	45.1628	45.1945	37.9839	23.9239	39.404	67.7148	40.7356	55.3747	77.6176	71.7638	50.7896	78.7368	41.6376	48.0174	63.9271	47.5953	101.117	60.7669	65.6069	58.5678
0.86_230.0308m/z	230.031	0.864583	0.116302	0	0.437814	0.139446	0.251701	0	0.235725	0.366287	0	1.00997	0	0	0	0	0	0	0	0.382904	0	0	0	193.841	193.057	176.781	180.011	179.936	123.303	140.592	132.989	135.498	121.079	127.013	83.6907	87.3773	96.2835	85.4369	68.0201	79.5569	72.523	76.0099	71.2073	84.8492	263.509	79.8283	111.104	207.684	84.9312
6.71_293.0707m/z	293.071	6.705	25.1109	22.4657	26.2173	16.6896	14.3482	16.2095	18.1577	21.9764	16.9585	19.8483	17.3371	19.08	26.318	16.9261	18.7798	17.9621	17.728	15.8055	17.3159	14.6258	18.1735	13.4237	12.1826	11.6656	12.6655	9.4281	10.3208	9.67828	9.38745	9.8241	9.40493	11.0973	13.0456	13.1377	12.65	12.1595	12.3709	9.97616	10.7771	6.89073	10.5258	8.64522	6.58396	19.7102	14.4122	7.98212	14.5857
3.27_484.8919m/z	484.892	3.26825	0	0	0	0.158792	0	0	0	0.0497339	0.52331	0.155552	0	0.607422	0	0	0.474777	0	0.0471002	0.548538	0.520203	0	0	146.193	138.467	159.324	147.838	142.851	144.579	129.934	125.92	118.252	117.864	123.492	95.9474	84.4119	81.9698	90.3946	89.9714	75.8044	74.6182	86.2893	72.2301	70.4784	322.792	61.3192	93.8954	272.973	100.634
0.85_1164.2870m/z	1164.29	0.848383	0	0	0	0	0	0.32019	0	0	0	0	0	0	0	0	0	0	0	0	0	0	0	15.7035	28.3209	33.3265	16.7745	18.0445	7.86251	21.9348	16.7928	11.3839	15.184	7.11559	6.79661	8.72817	5.37866	12.8098	3.86124	9.12872	11.6396	10.7993	6.64886	12.0476	26.0233	2.8802	19.4735	18.2684	7.43324
3.24_554.0774m/z	554.077	3.23583	0	0	0	0.493652	0	0	0	0	0	0	0	0	0	0	0	0	0	0	0	0	0	20.389	21.7411	25.8319	23.3169	21.9339	18.1168	18.675	20.1846	21.0814	12.2062	17.7078	11.2314	13.1129	15.5189	14.4945	11.2915	4.32666	5.0271	14.9982	6.87747	4.32197	82.5333	4.13398	9.55586	35.265	2.92921
4.57_573.6735m/z	573.674	4.5729	0.744263	0	0	0	0	0	0	0	0.281111	0	0	0	0	0	0	0	0.157841	0	0	0	0	79.6049	73.4204	68.5118	47.7662	65.8458	42.521	53.4581	42.0201	52.1841	43.9887	38.3103	39.3105	41.1052	44.1452	30.3681	40.292	36.7369	37.2284	30.4078	34.0543	38.7035	138.262	11.5448	5.54188	48.3706	7.51412
3.15_180.0886m/z	180.089	3.14597	2.88751	1.72418	2.57982	3.58844	3.64023	3.03783	4.62668	4.32213	1.56796	3.01806	4.56355	2.14876	1.38089	3.48403	5.2252	4.06783	1.90829	3.08913	10.0276	9.89488	3.79948	4445.29	4345.43	4346.51	4367.91	4252.97	3425.6	3570.1	3315.01	3451.36	2987.7	3046.76	2488.03	2693.4	2328.04	2283.24	2195.8	2113.78	2158.74	2232.75	2451.08	2242.71	8530.93	817.728	3459.19	6501.27	3417.98
4.99_377.1941m/z	377.194	4.9884	0.645081	0.202199	0.51195	0	0.446962	0.373878	0.59108	0.458954	0	0	0.381943	0.564894	0.475281	0.928264	1.0658	0.75404	0	0.594513	0	0	0	324.374	337.647	320.995	326.717	324.884	286.34	286.166	261.696	257.849	219.533	238.109	242.322	280.312	301.071	282.598	230.748	239.338	245.859	240.897	266.248	254.201	501.281	104.188	243.816	380.216	276.648
0.90_997.0116m/z	997.012	0.897017	0	0	0.593384	0	0	0	0	0	0	0	0	0	0.677155	0	0	0	0	0	0	0	0	83.9856	84.5283	91.8183	66.5373	103.161	54.9922	60.7776	41.0941	42.5053	48.0636	40.7682	49.3555	27.8369	43.3933	43.6351	20.5791	25.6869	38.8814	30.7992	38.206	41.2073	94.958	16.7273	51.0966	92.9884	38.2001
1.03_246.0444m/z	246.044	1.0301	0.428993	0	2.45682e-05	0	0	0	0.252366	0.171661	0	0.650879	0	0	0	0	0	0	0	0	0	0	0	92.0403	84.3195	87.0474	83.9869	81.2177	59.5942	66.1339	55.7624	59.0223	51.9306	60.9244	37.1681	34.136	34.6813	34.315	31.5878	28.0041	33.6829	33.8014	31.0194	34.0298	110.286	33.3927	56.8143	75.2764	60.3352
1.73_284.1032m/z	284.103	1.72998	0	0.574813	0	0	0.171002	0.460541	0.000788965	0.2948	0.143771	0	0	0	0	0.165909	0	0.218379	0	0	0.287796	0	0	126.263	131.086	148.271	146.021	135.535	124.372	113.311	108.586	107.964	92.8571	97.2533	67.0442	47.7866	54.9267	63.1271	57.3238	53.7099	57.1616	56.4986	54.7582	56.2305	519.421	10.9998	141.587	254.132	74.3884
3.15_741.3366m/z	741.337	3.14597	0.64113	2.96666	0.843235	0.533986	2.21216	1.73906	0	1.77808	0.963654	0.870911	0.894379	0.435053	0.713409	0.926903	0.404555	0.517731	0.00255687	0.200043	1.24311	1.5726	0.718903	995.988	992.001	976.7	1005.57	1013.65	894.318	859.379	836.187	893.583	737.853	760.556	576.44	582.781	551.131	596.125	559.633	510.812	531.718	523.873	579.665	501.867	2737.34	269.076	659.009	1794.23	586.204
3.80_866.0093m/z	866.009	3.79723	1.78311	2.01318	1.30735	2.1403	1.28574	1.64833	1.6709	1.8748	1.31131	4.03635	1.33414	2.45285	0	0.91348	2.507	0	2.83267	0.60153	1.58066	1.33873	0	1560.15	1461.21	1507.21	1605.89	1478.84	1401.79	1351.03	1238.11	1284.9	1180.54	1150.34	1036.04	1085.87	1000.03	919.776	938.165	922.076	903.626	947.638	979.884	874.37	4242.37	587.949	668.936	1254.18	652.977
0.88_1177.6649m/z	1177.66	0.8808	1.30627	0	1.31456	1.44257	0	1.39636	0	0	0	0.660645	0	0	0	0	0	0.675659	0.621712	0.0805336	0	0	0.300293	490.303	470.157	497.665	401.643	424.525	286.463	379.216	303.642	322.152	271.582	294.271	163.146	199.753	263.228	222.997	185.275	177.187	208.123	186.492	184.946	228.635	396.273	55.4784	473.608	515.663	306.08
4.10_567.1767m/z	567.177	4.10135	0.854523	0.148854	0	0	0.337798	0	0.304173	0.690891	0	0	0	0	0	0.0228448	0	0.749674	0	0	0	0.446911	0	182.717	176.219	183.537	152.148	162.485	129.965	117.757	108.714	108.834	80.1013	93.9597	102.836	103.259	104.422	105.047	87.5081	86.7706	79.6614	88.8866	101.586	89.9347	1105.07	19.8085	78.3167	95.3527	68.0154
2.74_603.6745m/z	603.674	2.73927	0	3.88702e-06	3.30971	0.0156192	0.730804	0.413574	0.6875	0.6875	0	0.411916	0	0.174559	0.575284	0	0	0	0.934992	0.025629	0	0	0	408.402	436.401	416.003	390.405	428.746	393.154	332.857	344.114	337.455	296.978	310.213	243.533	236.235	211.079	196.734	204.012	185.431	175.109	212.279	225.327	209.601	1592.64	110.244	259.847	568.842	274.785
2.28_376.0927m/z	376.093	2.27517	0.413296	0	0.683105	0.348235	0	0	0	0	0	0	0	0	0	0.0172781	0.115555	0	0	0	0	0.127289	0	102.746	105.087	107.89	110.012	105.591	80.0258	89.58	84.4566	73.0187	78.467	68.4083	49.9234	35.4182	46.0501	47.606	50.7476	45.0549	40.9035	40.0738	38.8549	43.6028	214.799	29.3037	74.7306	158.908	92.3125
0.86_998.7159m/z	998.716	0.859183	0	0	0	0	0	0.774048	0	0	0	2.1203	0	0	0	0	0	0	0	0	0	0	0	199.589	175.219	179.609	119.915	138.339	105.931	136.425	97.0096	87.6553	81.8189	81.8748	47.7274	43.7393	75.7097	86.5197	74.3993	79.2833	65.5532	90.4104	91.7174	76.2167	185.688	16.6565	169.759	168.675	108.667
3.23_760.3480m/z	760.348	3.22502	0	0.632782	1.55534	0.615417	1.45636	0.365888	1.06055	2.12186	2.22088	0.0709238	0	0.965827	0	0	0.741003	0	0.435946	0	0.335988	0.875132	0	708.151	692.905	652.697	719.349	632.827	574.223	553.676	548.798	564.631	466.304	517.034	385.988	399.583	394.194	388.196	368.337	338.092	360.522	365.607	410.98	341.568	2305.31	160.379	369.993	995.692	386.99
3.17_661.8025m/z	661.802	3.16758	0.534943	1.61237	1.57159	1.05203	1.61506	0.489005	1.42828	1.28571	0	2.38152	1.55338	0.495392	0.804545	0.86499	1.14995	1.17003	0.710858	0.0383259	1.27612	0.489444	1.67928	1109.8	1075.57	1134.31	1074.77	1096.81	947.044	970.564	857.98	901.69	770.706	799.438	650.038	665.036	615.913	639.556	570.878	560.838	548.929	562.276	656.335	576.156	3637.52	342.131	649.144	1784.27	673.327
5.81_139.9654m/z	139.965	5.81257	44.8243	44.5882	44.4476	52.9149	36.4681	33.9606	35.4438	38.1224	34.3066	37.463	53.8389	60.2088	47.009	31.0566	39.0931	52.4546	56.7259	38.7992	40.0823	42.1669	37.2673	28.6772	26.0945	35.4278	33.9984	29.527	33.743	23.4542	20.8754	20.2355	17.2088	16.9962	27.5016	20.827	24.9963	37.1344	25.1009	21.8656	32.9381	21.4071	24.3919	20.7903	22.416	43.4548	35.8509	28.038	28.1919
3.59_211.0584m/z	211.058	3.59388	0.330796	0.510455	0	0.503126	0.257321	1.1754	0.867869	0.237963	0.38819	0.478015	0	0.76079	0.337975	0.575412	0.00715198	0.995662	0.0697036	0.307627	0.0713032	0.145193	0.527291	396.055	386.078	371.352	380.94	381.023	351.208	326.707	314.236	324.088	280.107	307.933	284.759	262.079	250.148	260.225	244.994	231.343	231.627	209.634	268	225.96	805.271	185.847	322.034	443.84	329.751
3.43_375.1702m/z	375.17	3.43377	0.119997	0.250092	0	0.491974	0	0.522643	0.665948	0.661548	0	0	0	0	0	0	0	0	0	0	0	0	0	135.357	151.909	144.877	143.566	140.883	120.509	115.351	104.281	122.487	89.0873	98.2691	87.8822	72.9222	98.7897	82.2949	85.3025	69.2196	63.478	61.514	87.5453	70.6672	405.841	31.4054	76.984	289.158	83.5914
4.67_459.1404m/z	459.14	4.66817	0.834749	3.77812	1.98706	2.95599	0.279641	1.67807	1.14969	0.979248	1.26424	0.200326	0	0.365738	1.17841	0	1.34589	0.184801	0.713235	1.63026	0.0838801	0.431246	0	893.05	901.612	874.549	911.376	880.187	849.399	803.413	775.154	827.051	660.92	723.277	723.189	733.457	734.507	643.559	626.01	605.263	566.386	576.455	689.453	594.083	1789.5	266.422	684.728	1365.04	814.874
3.15_556.5006m/z	556.501	3.15137	1.07837	0	0	0	0	0	0.329196	0.201353	0	0	0	0.237244	0	0.809946	0.241943	0.868836	0.109731	0	0	0	0	229.37	191.253	200.602	210.299	195.987	168.989	167.908	162.084	168.314	181.952	163.132	129.872	105.826	101.28	99.7576	102.713	94.9503	83.4797	103.152	113.541	80.2483	568.364	74.5343	115.452	334.21	123.194
3.18_441.8714m/z	441.871	3.17838	0	0	0	0	0	0	0.28804	0	0	0	0	0	0	0	0	0	0	0	0	0	0	11.5939	20.0788	11.8643	12.6394	16.9124	10.2205	15.5369	16.8932	10.0372	6.95765	6.8606	6.62976	7.24038	6.19036	6.60576	4.83465	5.27531	3.98235	6.92147	5.60587	3.95382	52.8178	8.35754	2.89254	28.6228	7.86971
4.72_439.1404m/z	439.14	4.72222	0	0.343582	1.19504	0	0.72818	0.320435	0	0	0	0.178772	0	0.598912	0	0.451536	0	0	0	0	0	0	0	174.942	166.55	176.847	186.474	158.541	146.388	144.868	136.476	154.249	125.258	132.223	115.117	137.097	126.229	120.252	123.672	99.9378	102.928	106.262	102.336	101.427	176.708	60.5884	111.781	203.681	167.502
4.73_287.1621m/z	287.162	4.72762	0	0.500259	0	1.04962	0.714828	0.306996	0	0.936798	0.894259	0	0	0.522853	0.628338	0	0.64827	0.469765	0.0855612	0	0.485367	0.962924	0	365.507	373.079	369.116	398.791	367.254	322.285	310.655	285.463	300.542	264.031	289.108	249.639	290.266	274.331	244.051	242.387	220.539	227.619	230.115	272.261	244.209	748.966	97.3525	269.905	420.169	336.422
2.83_594.0305m/z	594.03	2.83115	0	0	0	0	0	0	0	0	0	0	0	0.794066	0	0	0	0	0	0	0	0	0	48.7454	49.5024	47.6506	60.7631	43.8571	32.8627	33.965	38.0276	29.6964	32.6388	34.1195	22.3958	16.4113	26.2053	23.4797	20.2531	17.4602	15.6567	15.5184	34.1889	23.8056	134.864	9.41084	38.032	65.7369	29.685
3.59_401.1047m/z	401.105	3.59388	0.303125	0	0	0.137268	0.000580073	0	0	0	0	0	0	0	0	0	0	0	0	0	0	0	0	16.8948	19.1979	22.4105	18.7104	14.8959	16.6065	18.7591	20.9791	19.3035	15.2769	15.8893	13.9458	6.80467	12.9592	10.7931	9.99098	8.41325	5.66286	4.23985	7.84987	11.1842	77.8464	3.73504	11.9549	27.0457	11
4.74_343.1431m/z	343.143	4.74383	0.511376	0.70432	0	0.161743	0.000826864	0	0	0.0352061	0	0	0	0	0.443766	0	0	0.13935	0	0	0.217272	0.265307	0.364166	139.126	134.48	125.789	136.567	132.551	116.297	106.853	97.6576	106.303	91.7982	100.007	104.044	103.899	109.173	85.1472	88.2532	77.0133	90.0233	82.6427	96.202	76.8498	291.307	44.0683	108.282	169.106	111.27
2.82_281.1139m/z	281.114	2.82033	0.6746	0.214417	0.6976	1.05521	1.03235	0.662369	1.72022	0.497072	1.20716	1.16728	0.656548	0.499056	0.846018	0.144623	1.53749	0.352093	1.26141	0.724347	0.403254	0.453781	0.636151	827.586	814.897	818.716	789.365	773.742	594.379	618.688	576.148	592.184	518.096	535.668	416.524	468.149	418.715	419.14	374.658	361.553	363.134	393.953	464.43	402	3221.69	433.883	274.23	1402.8	333.66
0.93_340.0977m/z	340.098	0.927433	0	0	0.585264	0	0	0	0.686722	0	0.231611	0	0	0	0	0	0	0	0	0	0.022771	0	0	81.9319	86.0943	78.6912	72.8386	66.7946	62.2957	52.011	49.7581	52.0497	41.2249	49.3218	37.0691	38.0459	42.5681	35.0265	36.659	30.633	36.2197	31.8328	34.634	45.4198	165.61	40.7706	38.9546	108.561	42.8305
0.86_587.8946m/z	587.895	0.859183	0	0	0	0	0	0	0	0	0.0893665	0	0.302673	0	0	0	0	0.392395	0	0	0	0.636047	0	104.129	101.974	115.692	92.3746	91.5673	69.6059	77.8558	64.5702	62.4301	54.9959	63.5112	34.2357	36.3148	46.5746	42.0998	39.9321	36.7734	37.2779	44.8941	35.8061	45.1817	101.061	25.7586	77.0565	76.5357	56.8685
0.92_386.0251m/z	386.025	0.922017	0.299841	0.329373	0.559143	0	0	0	0	0	0	0	0	0.309311	0.275497	0.129089	0	0.343491	0	0	0	0.0872802	0	136.145	132.611	135.368	107.203	117.66	101.418	92.9764	84.1265	91.1424	68.7553	91.4603	65.4725	59.3668	73.7711	76.3986	54.3922	60.3847	64.6488	67.1438	52.9601	72.9336	195.056	32.9093	107.635	219.783	132.765
3.26_727.3350m/z	727.335	3.26285	0.662361	0.96698	0	1.41776	2.3313	0	1.13239	1.7323	1.75751	0.904109	0	0	0.227259	0.893636	1.16638	1.15613	1.82252	0.353394	0.417675	0.486907	0.860168	776.167	811.329	773.643	749.808	742.188	721.423	707.308	711.063	671.405	571.939	623.698	510.845	490.049	476.496	492.3	465.592	430.577	433.291	441.315	499.668	441.373	2005.19	225.408	427.081	1370.47	460.834
0.92_643.0792m/z	643.079	0.922017	0	0	0	0	0	0	0	0	0	0	0.31012	0	0	0	0	0	0	0	0	0	0	27.1844	22.4438	20.5173	19.9657	21.7852	19.9159	12.6363	10.6841	11.5384	9.09676	12.6022	9.0186	7.31533	6.53154	7.17814	5.05213	6.19079	7.97847	8.55279	4.72021	7.70765	27.2069	1.23395	17.5721	33.9328	2.15351
0.90_294.8490m/z	294.849	0.897017	0.419979	0	0	0	0	0	0.448672	0.15629	0	0	0	0	0	0	0	0	0	0	0	0	0	50.5959	46.3429	46.2135	40.8315	40.9255	31.1098	29.0924	25.9906	23.0128	14.6491	27.7167	15.3845	17.009	25.0814	15.8394	19.7458	17.1947	17.7373	19.6269	13.7338	22.8333	52.1892	23.7607	22.861	39.7091	35.792
0.87_672.7885m/z	672.788	0.87	0	0	0.470062	0	0	0	0.385315	0	0	0	0.685394	0	0	0	0	0	0.382167	0	0	0	0	125.291	133.657	118.272	120.03	122.896	80.7147	99.2975	77.3209	73.9222	64.7153	75.374	44.2401	46.6553	66.7701	64.288	43.7873	37.0828	43.732	60.47	40.7154	46.3602	120.335	7.54729	84.7732	96.7107	73.1173
3.81_865.6087m/z	865.609	3.81343	0	0.591614	5.34641	2.02647	3.02784	1.60215	2.46583	1.58294	1.51277	1.84064	0.309082	0.508697	1.16668	0.995919	2.25568	0.509304	0	1.9642	0.909214	1.95801	0	1407.02	1408.28	1357.62	1334.77	1392.01	1207.4	1183.28	1132.43	1182.87	1066.49	1010.14	935.311	1057.87	844.585	851.453	836.453	869.386	874.815	865.423	920.135	819.044	3681.15	595.06	539.669	941.912	590.947
2.72_610.2799m/z	610.28	2.72307	0.809845	0.513153	0	0	0.143228	1.08032	0.402977	0	0	0	0	0	0	0	0.378113	0	0	0	0	0	0.551719	210.315	235.051	211.896	219.677	192.605	182.571	194.612	164.155	179.777	163.913	156.616	127.843	102.603	106.441	99.6374	97.5812	87.3791	101.166	89.1094	114.038	94.8751	737.691	37.1995	118.612	379.449	130.895
2.71_751.5891m/z	751.589	2.71225	0	0	0.982507	1.03143	0	0	0.00914483	0	0	0	0	0.0367583	0	0	0	0	0	0	0	0	0	90.6706	106.27	102.393	104.27	96.0973	86.8532	84.6501	59.0037	75.4368	58.3347	62.4555	45.6448	47.8874	47.4869	29.9062	40.1317	41.3266	41.8119	49.0024	72.996	39.6435	381.612	22.9344	50.156	149.146	54.5624
1.20_317.0813m/z	317.081	1.20102	0	0	0	0	0.4319	0	0	0	0	0	0	0	0	0.00232257	0	0	0.405597	0	0	0	0	65.9516	59.0981	63.0866	52.2523	52.6757	52.9885	49.9523	42.8832	44.1352	34.7639	40.6892	25.1788	15.6518	23.8532	22.2698	16.9907	20.0675	15.837	16.4935	14.495	13.7759	179.239	12.1238	56.8214	93.7541	34.2749
0.92_636.9610m/z	636.961	0.922017	0	0.282032	0	0.856656	0	0	0	0.192899	0	0	0	0	0	0	0.596558	0	0	0	0	0	0	117.617	115.72	134.816	108.893	125.436	84.4006	78.1411	66.6861	63.2216	58.611	60.8985	48.0648	51.5114	55.7065	47.816	42.6843	47.5806	52.0845	59.5841	49.7347	55.5615	132.146	64.0564	37.4429	96.3315	57.52
0.87_701.8155m/z	701.815	0.87	0.0243976	0	0	0	0	1.34442	0	0	0.347961	0.968457	0	0	1.2215	0	0	0	0.579468	0	0	0	0	296.397	284.972	269.419	255.294	257.432	179.579	222.378	208.115	176.969	158.038	163.39	98.4775	110.837	131.271	120.104	104.165	114.914	115.936	115.183	114.09	127.748	315.904	59.9473	157.05	254.736	154.042
3.46_386.1948m/z	386.195	3.45538	0	0	0	0	0	0	0	0	0	0	0	0	0	0	0	0.300385	0	0	0	0	0	20.6237	11.2272	13.3135	13.6378	17.6454	13.8625	10.0588	12.2727	18.5666	8.14731	10.8481	8.31853	4.53584	7.41656	9.51365	2.66466	6.17213	6.10764	11.7146	9.54731	4.51927	65.8314	3.98936	7.72344	41.6971	9.69106
0.88_932.2261m/z	932.226	0.8808	0	0	0.440033	0	0.246826	0	0	0	1.08337	0	0	0	0	0	0	0	0	0	0	0	0	102.677	102.092	97.7936	90.4285	96.7762	59.7483	84.5978	68.9782	80.8238	61.7607	62.3744	29.4189	37.2673	47.0279	39.7243	33.2353	45.3438	47.0957	49.5545	37.4437	48.0365	110.777	14.1094	95.8633	89.8329	66.0949
0.86_956.7254m/z	956.725	0.864583	0	0	0	2.89332	0	0	0	0.392029	1.06805	0.213776	0	0	0	0	0	0.723328	0	0	0	0	0	310.564	262.453	293.555	247.351	262.308	182.483	200.482	181.421	193.289	157.891	173.206	98.2597	110.927	141.116	123.42	118.182	112.796	118.517	141.873	113.282	138.601	300.973	38.4912	279.72	293.689	169.599
1.55_471.9590m/z	471.959	1.54827	0.39418	0	0	0	0.792786	0	0.048954	0	0	0	0	0	0	0	0	0	0	0	0	0	0	55.8108	67.199	71.4296	56.5223	65.8507	57.8934	61.6195	56.6148	55.5458	50.4278	47.1561	31.6716	21.5976	29.8006	24.5892	29.344	22.9851	32.1866	29.6011	28.2139	26.5982	126.541	64.736	14.1254	192.26	30.3822
1.07_189.1240m/z	189.124	1.07333	0.0263831	1.15352	0.650281	0.757194	0.898323	1.06427	1.98884	0.577691	0.688416	1.68835	1.23816	1.01258	1.12516	0.324158	0.627941	0.423575	0.737541	0.438818	0.451988	0.212135	0	730.61	706.953	723.048	714.808	703.221	636.031	611.687	565.996	582.21	506.755	527.399	428.14	357.494	372.23	396.17	363.36	366.626	383.108	375.719	356.346	352.444	1204.23	347.183	437.76	878.041	537.389
2.74_754.5916m/z	754.592	2.74468	1.03897	0.817596	0	1.03339	0.39956	0.876495	0.494302	0.612	0	0.744293	0	0	0	0.671404	0.00100934	0	0.432037	0	0	1.53512	0.312012	471.363	445.954	464.341	415.864	446.635	409.015	373.261	383.798	360.724	317.434	321.515	245.077	223.301	222.574	246.46	226.447	204.114	200.437	219.741	231.963	215.747	1855.56	123.224	272.528	613.111	293.58
0.88_1074.1811m/z	1074.18	0.8808	0	0	0	0	1.09062	0	0	0	0	0	0.759094	0.996643	0	0	1.24478	0	0	0	0.306235	0	0	274.482	243.866	214.151	227.876	249.489	168.542	169.593	154.117	162.904	147.124	148.752	92.1998	112.672	117.062	132.336	102.094	96.8071	124.085	94.1551	108.136	129.391	289.713	59.1666	195.166	232.299	152.624
0.81_599.6671m/z	599.667	0.80515	0.213576	0	0	0	0.546326	0	0	0	0	0	0	0	0	0	0	0	0.236947	0	0.545837	0.303481	0	91.3442	77.7185	89.012	78.2103	86.3108	77.1137	77.816	69.335	67.3281	68.6448	66.4396	49.597	32.4241	32.2411	45.7794	43.4151	47.9266	40.6048	36.7724	46.1521	35.9566	185.582	42.2671	57.8808	164.679	99.7078
1.54_471.7084m/z	471.708	1.54285	1.17589	0	0	0	0	0	0	0	0	0	0	0	0	0	0	0	0	0	0	0	0	77.6518	52.6478	60.4888	62.0228	53.6412	54.5763	54.3369	55.3507	52.4457	44.6982	50.2569	23.922	20.2369	26.1072	14.631	25.5195	21.2113	30.1261	28.0203	25.6692	25.3753	134.514	62.2038	14.4996	186.227	21.6383
0.92_802.9613m/z	802.961	0.922017	0	0	0.309753	0	0	0	0	0	0	0	0	0	0	0	0	0.0624263	0	0	0	0	0	19.7586	21.8124	25.5875	29.3072	25.8965	26.2566	15.5265	15.2897	8.78581	9.85388	11.3478	8.9849	19.8843	7.67337	5.68634	5.44696	8.0493	10.2692	10.4706	5.65734	8.21931	19.8432	2.35328	16.6767	37.9228	6.03448
0.81_475.6085m/z	475.609	0.80515	0	0	0	0	0	0	0	0	0	0	0	0	0.419632	0	0	0	0	0	0	0	0	21.398	22.502	20.7022	19.1924	22.1168	23.82	19.3151	15.9924	21.3755	17.6193	22.0078	17.8904	5.436	9.30454	9.26189	11.1088	8.85869	9.42701	10.8359	9.56431	11.0706	44.3273	6.68266	13.9789	27.6228	7.74441
0.86_594.7519m/z	594.752	0.864583	0	0	0	0	0	0	0	0	0	0	0	0	0	0	0.490143	0.447418	0	0	0	0	0	40.7846	45.8694	33.2002	36.8274	38.0991	25.8781	34.358	18.5651	31.5969	22.8492	19.8796	12.3771	12.834	17.5113	14.9883	10.1007	14.7165	11.0986	13.8492	9.71385	10.3691	40.4082	6.7388	63.5779	48.3139	63.0552
6.75_295.6358m/z	295.636	6.75162	1.19139	0.96913	0	0.349072	0.165497	0.376465	0.0840011	0.726394	1.02998	0.696953	0.387415	0.000557157	0.408722	0.373244	0	1.61106	1.20182	0.101391	1.23981	0.872997	0.382026	470.205	465.324	466.852	503.166	458.308	420.134	370.749	361.692	436.364	381.801	450.592	431.192	447.601	452.098	446.743	417.732	398.144	394.969	422.015	425.522	415.32	1107.22	29.4785	395.839	690.695	485.055
3.88_659.3203m/z	659.32	3.87828	0.230225	0	0	0	0.181654	0	0	0	0	0.724243	0.268829	0	0	0	0	0.830292	0	0	0	0	0	102.963	81.505	111.083	104.669	106.865	66.916	82.0149	59.9839	75.8964	60.0155	61.9764	53.1426	59.144	59.4459	57.5941	60.5431	35.3786	53.2739	64.6801	58.2545	46.8926	570.982	11.7405	33.6266	225.995	44.6873
6.67_300.2913m/z	300.291	6.67257	15.489	16.5255	12.5637	7.2004	9.01448	15.463	12.8155	14.6176	13.7787	9.58347	11.4685	14.147	12.4595	4.50156	11.2709	11.427	11.4521	7.95728	6.52415	4.12267	4.89473	5.27695	4.20339	3.59686	3.60707	5.70774	8.66303	8.41558	6.64532	5.32183	8.43439	6.50769	11.6443	13.0853	6.11859	3.60302	8.70547	8.4809	7.10301	2.30301	3.85988	6.06255	3.31044	12.0672	8.18218	3.73846	6.35617
0.90_1168.9261m/z	1168.93	0.897017	0	0	0	0	0	0	0	0	0	0	0	0	0	0	0	0.852392	0	0	0	0	0	37.4129	58.0822	48.445	56.2153	66.5222	27.5437	46.7048	41.1075	27.2236	20.4001	15.877	30.618	20.4804	19.4193	24.5296	19.7874	29.8298	25.4382	34.4426	18.5909	25.5546	65.5081	15.5441	41.2208	64.1374	30.9175
0.88_1191.6652m/z	1191.67	0.8808	0.935974	2.52917	0.891085	0.850542	0.776611	0	0.800781	0	0	1.05859	0.000232318	0.271606	0	2.40564	0.633484	0.741926	0.695374	0	1.82812	0	0	875.232	782.47	810.377	791.082	784.629	512.028	643.591	603.426	556.47	501.299	479.33	269.769	286.029	390.664	352.885	290.009	293.895	393.13	354.162	336.869	343.866	879.293	75.473	795.88	1002.95	486.13
1.17_411.0835m/z	411.084	1.174	0	0	0	0	0	0	0	0	0	0	0	0	0	0	0	0	0	0	0.403919	0	0	34.1775	33.36	27.9738	26.6457	32.9936	28.4219	20.7245	22.876	26.9211	13.3335	23.2953	8.8978	7.94643	7.38645	9.24286	11.395	3.42699	8.68803	7.87235	5.97477	6.74718	44.6823	9.30854	10.25	36.3016	17.1852
1.02_966.3380m/z	966.338	1.0247	0	0	0	0.00463723	0.0143941	0	0.842743	1.27228	0	0	0.71784	0.496277	0	0	0.234519	0	0	0	0.814456	0.761078	0	358.611	315.935	335.321	316.55	326.058	267.666	259.27	238.726	248.528	224.755	213.755	144.748	93.3563	113.96	124.415	119.873	117.507	126.627	103.875	98.6364	124	562.159	166.198	271.559	498.722	212.839
0.88_678.8400m/z	678.84	0.8754	0	0	0	0	0	0	0	0	0.402088	0	0	0.484192	0	0	0	0	0	0	0	0	0.701233	99.0807	96.8848	100.761	79.4537	92.3194	82.2101	57.5098	57.0642	63.8246	46.5269	53.3837	34.0345	41.3559	45.5594	56.1095	42.6015	45.3476	41.1819	47.3251	37.781	56.1329	115.087	24.3425	61.6128	69.3285	36.376
6.56_184.9873m/z	184.987	6.56448	35.6565	34.3212	29.8215	27.7031	23.8949	21.0862	26.5645	25.7619	31.4936	31.1422	39.2068	38.5815	41.9971	22.8877	34.5057	40.6323	32.7841	40.8053	27.4642	22.967	13.4885	21.6363	17.8534	21.9909	20.8415	26.9517	20.6488	15.392	13.1388	20.1793	15.5084	26.5768	26.6719	19.6621	19.5256	24.5505	18.4665	18.6283	16.6538	16.0403	19.8223	11.4685	11.6481	29.4304	36.6113	20.931	23.8283
2.92_761.6673m/z	761.667	2.921	1.08636	0	0.7643	0	1.52038	0	0	0	1.23441	1.19418	1.65917	2.00891	0.747925	0	0	0	0	1.30798	0	0.712097	0	577.331	536.68	540.072	549.389	575.465	510.095	522.355	465.746	501.358	431.386	426.356	315.748	309.99	269.205	297.575	301.564	283.922	263.92	289.066	301.309	257.641	1336.78	207.862	282.209	870.071	363.247
2.70_549.0052m/z	549.005	2.69605	0	0	0.246498	0.481293	0	0.876723	0.473022	0	0	0	0	0	0	0.0234107	0	0.0328302	0	0	0	0.225006	0	150.223	121.981	119.514	127.881	99.7648	87.5748	82.645	114.071	92.3112	72.7273	96.7419	46.6299	41.459	52.5278	60.5019	50.9682	52.6264	44.8437	50.1101	44.0886	37.5392	404.483	34.3599	80.931	196.295	74.7033
2.06_484.1667m/z	484.167	2.0556	0	0	0	0	0	0	0	0	0	0	0.254745	0	0	0	0.389954	0	0	0	0	0	0	40.4975	40.5772	35.9072	46.2912	36.2852	33.5722	27.4935	26.9915	34.0844	21.9272	30.7265	12.8464	10.1449	14.7547	17.7916	12.0587	16.7573	6.7067	5.68198	10.5762	9.3074	149.547	14.2176	12.5903	38.0243	17.9332
2.79_688.9827m/z	688.983	2.79332	0	0	0	0	0.790124	1.24347	0	0	0	0	0.252441	0.423559	0.292603	0	0	0	0	0	0.209611	0	0	167.251	146.505	166.044	156.579	159.01	125.766	134.417	127.503	129.268	91.3774	103.446	77.9244	69.2613	70.9954	52.4935	64.9287	52.5005	64.1179	70.6908	75.7875	53.7377	602.546	27.5344	74.6566	317.278	67.704
2.80_589.0845m/z	589.085	2.79872	0	0	0	0	0	0	0.778595	0.514074	0	0	0	0	0	0	0	0	0	0	0	0	0	82.0608	69.8523	77.4099	72.3271	72.6466	62.0181	68.8386	67.2662	58.2562	53.2964	48.1106	31.1611	28.9405	37.7944	26.5871	20.5347	19.3837	21.127	25.2949	20.1083	24.7988	118.36	18.116	13.2808	44.7718	2.56758
4.05_303.1562m/z	303.156	4.05472	0	0.475372	0	0	0	0.376724	0.157919	0	0	0	0	0	0.278401	0	0	0.0931394	0.375947	0.617398	0	0.388077	0	134.024	134.435	141.769	132.65	130.253	114.49	107.591	99.8739	102.504	92.0334	80.3517	78.8728	89.7017	100.764	89.5734	78.7973	84.3524	87.5863	83.5869	97.2743	81.2607	611.363	17.3089	137.419	189.66	127.933
3.26_627.0461m/z	627.046	3.25745	0	0	0	0	0.113903	0	0	0	0	0	0	0	0	0	0	0	0	0	0	1.06857	0	77.067	67.0217	60.5444	58.5843	69.186	60.2873	58.978	48.7453	51.7349	48.1071	36.9822	42.8454	41.7858	32.2931	24.9185	27.3129	26.8119	23.6596	28.1377	27.4833	19.1216	231.068	9.37854	33.3464	106.211	38.9403
6.04_453.7849m/z	453.785	6.03552	10.4778	3.18511	9.989	32.5489	13.0048	11.2255	7.58858	16.8755	9.30798	9.13411	11.0948	19.1703	3.96617	0.567434	3.93945	10.3633	3.50971	1.37792	9.3869	2.2592	6.1571	13.4987	0.745483	4.13331	4.74781	8.51029	61.0043	10.5782	4.71176	11.1922	0.594381	5.21613	3.48479	0.61499	1.11336	0.49382	2.37119	2.71959	0	2.41785	2.08846	0.514988	5.74346	36.7397	42.0001	24.2193	11.9644
0.88_958.7894m/z	958.789	0.8808	0	0	0	0.833313	0	0	0	0	0	0	0	0	0	0	0	0	0	0	0	0	0	48.4708	45.1352	43.463	51.5657	50.5949	14.5343	41.3395	53.8225	50.4968	46.6432	40.3951	11.7459	30.8256	21.7949	10.6768	11.5186	12.7936	11.801	11.7337	10.695	22.241	37.8538	1.00117	38.5614	71.5382	31.3902
3.88_335.0712m/z	335.071	3.8837	0	0	0.491461	0.265744	0.292734	0	0	0	0.280435	0.000294723	0	0	0	0	0	0	0	0	0	0	0	67.2232	68.4649	78.4922	73.808	67.3447	52.5654	50.8722	38.5043	47.787	32.9146	36.5467	35.6392	47.0333	35.5432	33.9251	27.3288	22.7728	22.0326	25.3225	29.5222	24.8852	64.0898	7.47333	19.2311	41.5757	35.444
0.99_862.3294m/z	862.329	0.986867	1.4639	1.00311	3.12125	2.70721	0	0	0.848785	0.706177	0	1.00177	0	0	0.388775	0	0	0	0	0	0	0.411194	0.696781	709.591	685.932	705.276	686.81	692.786	621.604	641.133	538.856	565.382	511.068	499.559	353.855	244.368	219.008	254.724	237.157	233.871	226.434	216.895	197.165	215.773	1519.84	260.815	551.212	1735.16	415.684
2.83_264.0891m/z	264.089	2.82573	0	0.823531	0	0.0237469	0.416966	0.264126	0.742126	0.44101	0.234665	0	0	0	0	0	0	0	0	0	0	0	0	151.444	151.276	152.532	144.851	132.613	117.74	113.323	105.526	106.515	92.151	98.1226	68.8724	78.3807	73.1646	74.2759	70.1639	64.919	65.5059	66.5236	81.9565	73.6368	502.066	64.0087	63.1392	232.046	56.2615
0.80_577.6454m/z	577.645	0.799733	0	0	0	0	0	0	0.49939	0	0	0.396251	0	0	0	0	0	0	0	0	0	0	0.0018578	24.9029	33.6664	34.0581	22.4409	31.6853	35.967	29.7404	32.8324	32.2214	23.7004	32.9728	20.1077	14.1644	11.8743	20.6213	16.0742	17.879	15.6063	16.3854	16.6145	17.0599	59.0152	19.7296	23.5055	44.9427	30.4085
2.82_657.4994m/z	657.499	2.82033	0.00499208	0.313019	0	0.681946	0	0.521271	0	0	0.910772	0	0	0	0	0	0	0	0	1.19447	0.154869	0	0	224.756	206.489	214.564	196.418	215.174	171.386	171.496	141.435	143.902	139.437	132.901	94.8514	97.3869	91.5196	77.8965	85.4843	74.9751	98.978	90.4589	93.0988	95.8583	768.406	48.1449	128.396	268.723	168.279
0.88_959.7115m/z	959.712	0.8754	1.42612	0.82663	0	0.868958	2.08905	0.455078	2.50195	1.81265	0.575073	0.420044	0	0.351698	0	0	0	0	0	0	0	0	0	597.389	570.26	587.027	499.921	537.662	426.741	404.266	364.088	394.595	314.601	340.836	225.989	242.212	247.842	258.278	241.251	255.428	210.81	243.581	257.691	323.674	579.218	75.2273	523.604	577.043	331.665
2.57_321.0602m/z	321.06	2.57377	0	0	0	0.239532	0.517639	0.167037	0.270325	0	0	0	0	0	0	0	0	0	0	0	0	0.118092	0	46.4115	39.2002	37.6701	36.7702	40.3669	35.0206	31.795	38.0387	33.3676	34.2352	30.7219	21.8077	19.3037	18.3186	22.2028	22.3223	21.3518	15.4025	17.6722	11.0535	18.6327	80.3929	1.78775	60.6732	78.6382	66.0466
0.88_1117.1584m/z	1117.16	0.8754	1.10046	0.834961	1.58146	0	1.28137	0	1.25203	2.55935	0	0	1.93178	0	0	1.04669	0.94928	0.402753	2.44073	0	0	1.4209	0	964.366	948.537	967.678	894.152	901.943	680.364	724.575	655.245	717.966	552.396	634.225	408.324	413.258	455.383	468.476	383.132	396.808	420.226	452.789	381.862	532.771	1091.39	205.366	752.925	1076.14	543.972
3.19_465.1629m/z	465.163	3.1892	0	0.420779	0.283356	0	0	0	0	0.451587	0	0	0	0	0	0.699478	0	0	0.136734	0	0.538391	0	0	123.726	131.334	124.105	136.041	119.175	102.138	101.388	96.492	105.222	76.8844	90.6973	78.0864	82.0958	71.8329	69.1032	72.8139	65.7424	68.2099	65.2094	73.466	65.1865	385.88	21.9549	76.6626	237.713	78.1126
0.98_310.1137m/z	310.114	0.981467	0.453873	1.5988	0.677216	0.377258	0.585225	0.735168	0.673401	0.369507	0	0.261642	0.663683	0	0.689133	0	1.15529	1.18944	0.284821	0	0	0	0	383.851	375.794	387.069	393.419	419.352	397.843	389.396	352.522	368.21	331.318	338.619	247.388	211.88	213.597	211.616	186.693	201.481	200.221	196.965	190.185	198.668	508.453	267.971	353.658	474.34	381.006
0.80_263.6474m/z	263.647	0.799733	0	0	0	0	0	0	0	0	0	0	0	0	0	0	0	0	0	0	0	0.177673	0	9.92814	7.35188	8.08741	8.49383	11.3464	8.1236	11.1177	11.5904	11.2488	7.95467	8.48709	4.84794	3.70569	5.15591	5.86183	3.13427	2.46329	2.53084	2.88581	2.39181	3.92638	19.5984	4.6124	8.93402	20.7083	10.0522
2.46_595.2268m/z	595.227	2.46228	0.975037	0	0	0	0	0	0	0.0274094	0	0.559235	0	0	0	0	0	0	0	0	0	0	0	97.0796	84.3029	93.5094	95.6401	95.7866	60.6665	62.3745	74.0158	53.3194	52.8609	46.3708	33.9519	29.8156	40.4684	33.9007	38.3566	32.0868	40.2293	40.7549	27.1429	33.3335	353.568	6.29906	45.4961	157.646	52.685
7.98_246.8633m/z	246.863	7.9751	96.9715	27.6426	48.5287	20.3066	29.0422	5.39761	3.70109	15.1069	9.75478	1.14613	8.20618	7.81317	1.83465	5.34542	6.59502	4.17614	5.38621	2.85164	1.9478	18.4921	6.17799	23.4294	3.00818	12.5245	4.30194	0.570809	11.4375	21.1346	67.1126	15.8948	28.0812	5.79811	3.71722	1.40751	2.37821	3.8011	5.54716	3.78685	1.88524	3.94398	1.75438	5.27492	4.12931	12.0711	18.1945	7.68722	3.38914
0.85_462.8625m/z	462.863	0.853783	0.384705	0.343292	0	0	0.0284001	0	0.217052	0.17001	0.362165	0	0.573425	0.437073	0	0	0.381226	0	0	0	0	0	0	122.204	98.1044	115.734	106.486	108.582	66.9925	77.6921	69.5753	64.2067	58.9644	62.9483	39.7165	33.7931	32.2558	30.7974	26.4651	37.3238	34.3119	35.0044	33.2629	41.7491	64.6805	11.9218	142.291	73.3752	27.2416
2.55_476.6275m/z	476.627	2.55215	0	0	0	0	0.3911	0	0	0	0	0	0	0	0	0.668182	0	0	0	0	0	0	0	59.4112	57.992	52.315	40.4202	48.0984	56.6793	43.591	57.6812	34.656	53.6069	42.6555	22.3795	16.7147	27.8786	27.1704	15.8582	20.2581	31.3341	31.1726	23.5548	27.2657	202.909	9.68931	25.2992	83.7526	39.5966
1.27_215.1392m/z	215.139	1.27467	0.562188	0.433222	0.725961	1.54458	0.356571	0.00368388	0	0.443209	0.371796	1.83679	0.0666288	0.589737	0	0.304504	0.300752	0.560776	0.396301	0.0759472	0.445648	0	0	408.507	397.007	381.75	399.482	376.714	344.046	333.78	301.238	316.718	290.959	313.53	232.256	186.351	210.554	220.761	197.179	207.291	198.87	218.549	189.599	208.701	706.306	160.943	275.03	567.502	276.019
0.87_788.7223m/z	788.722	0.87	0	1.06732	2.28049	0	0	1.53113	0.733032	0.034841	0	0	0	0	0.702484	0	0	0	0.247778	0	0	0.952942	0.356232	470.416	437.109	449.953	449.184	452.276	285.122	364.492	359.436	335.265	278.189	295.654	160.469	204.07	216.729	209.509	167.423	194.279	206.809	175.869	184.337	229.034	451.981	59.2711	373.129	496.492	284.458
0.90_395.0531m/z	395.053	0.897017	0	0	0.323218	0	0	0	0	0	0.356262	0	0.373398	0	0.112991	0	0	0	0	0	0	0	0	52.775	47.5125	57.7991	49.3182	54.928	48.1807	39.8556	35.7548	37.8512	29.7674	39.1613	22.3247	21.7429	29.5065	25.028	22.0558	18.6822	21.3421	18.2718	17.0489	21.6576	96.8279	32.3959	45.4631	63.2546	35.9349
0.92_44.0500m/z	44.05	0.922017	0	0	0	0.110224	0	0.223368	0	0.153976	0	0	0	0.149582	0	0	0	0	0	0	0	0.0100433	0	32.0489	28.2582	27.7917	27.7413	26.7581	21.4562	18.7025	18.6254	18.0263	18.547	18.5493	16.0152	14.7775	17.294	16.9557	15.5123	17.6153	17.9673	14.5176	15.4388	16.0338	63.6159	11.7164	15.4822	43.5123	16.9454
4.05_384.0711m/z	384.071	4.05472	0	0	0.0357276	0	0	0.623636	0	0	0	0	0	0	0	0	0	0	0	0	0	0	0	31.0826	30.5637	37.8147	38.6937	28.7779	24.8945	20.6768	19.371	23.2767	14.6387	13.1944	15.5918	10.5367	20.4924	25.4124	10.293	9.93771	8.63187	13.9551	12.1793	10.9046	21.7557	6.16587	31.6434	46.2119	35.2091
0.82_548.6495m/z	548.65	0.82135	0	0	0	0	0	0	0	0	0	0	0	0	0	0	0	0	0	0	0	0.552124	0	45.6428	34.4089	40.2545	35.1319	35.1224	28.153	37.1057	31.4274	31.3769	35.447	25.7009	14.8877	9.19712	11.0101	14.6916	19.9787	13.2707	13.3852	13.3393	8.11833	9.59344	95.713	4.34601	26.6156	62.6709	22.692
0.88_388.9941m/z	388.994	0.8754	0	0.275439	0.142258	0	0	0.00420273	0	0	0	0	0	0	0	0	0	0	0.133667	0.112076	0.0573616	0	0	46.3452	38.9179	45.5628	37.0554	36.4739	26.7402	31.5284	29.2474	29.1435	27.1692	28.6665	15.7597	12.5717	15.2785	16.9733	9.66975	8.40985	2.79525	9.73931	10.1148	17.7374	59.5682	11.9647	31.5175	55.7138	38.9257
3.27_479.5733m/z	479.573	3.27365	0	0	0	0	0	0	0.709106	0	0	0	0	0	0	0	0	0	0	0	0	0	0	34.9086	27.388	36.6664	29.34	29.1718	26.9083	28.141	32.547	35.2406	30.1608	20.4022	22.9812	17.4319	18.8303	8.60555	12.4446	14.471	16.7409	11.7011	11.2817	14.0149	102.171	10.9176	3.71295	55.8801	19.6182
3.23_570.0101m/z	570.01	3.23042	0	0	0	0	1.01239	0	0	0	0	0	0.140317	0	0	0.427786	0.292988	0	0	0.287018	0	0	0	96.1254	121.26	109.304	122.641	89.4964	103.061	82.6251	74.5043	80.0827	68.1687	81.5153	67.6681	49.67	55.5871	70.5183	56.2336	56.4686	45.786	41.8348	59.5103	41.0312	366.768	19.8345	60.2875	189.534	61.9908
0.83_649.1802m/z	649.18	0.832167	0	0	1.02719	0	0	0	0.428345	0	0	0	0	0	0	0	0	0	0	0	0	0	0	97.6561	82.349	88.0352	73.0762	87.1356	71.7567	73.2244	64.3915	72.3411	62.4647	61.6371	48.211	34.3822	24.0675	20.7835	30.3249	24.2479	27.94	20.1211	13.9463	21.7791	126.757	32.0361	65.1725	127.594	44.9075
0.89_674.9041m/z	674.904	0.8862	0	0.431396	0.385986	0.805673	0	0	0	0	0	0	0	0	0	0	0.608185	0	0	0	0	0	0	115.175	122.829	133.925	127.988	133.901	80.0599	107.143	81.761	73.463	77.4875	73.9405	46.2471	60.387	62.1225	56.6243	39.1026	48.8895	49.8197	57.8472	50.9035	57.1847	110.744	16.2694	66.4319	93.5878	60.1165
0.90_664.0027m/z	664.003	0.897017	0	0	0	0	0	0	0	0	0	0.832252	0.181087	0	0	0	0	0	0	0	0	0.269227	0	80.2263	74.1919	88.3689	81.5562	72.9391	46.6331	55.9125	41.6496	30.2447	25.6525	33.4534	42.8648	31.337	29.8801	40.8934	28.6415	32.0038	32.9907	31.8851	38.6194	34.0747	78.2025	44.9584	29.9295	41.8784	21.1231
0.90_865.8886m/z	865.889	0.897017	0	0	0	0	0	0	0	0	0	0	0	0	0	0	0.501953	0	0	0	0	0	0	26.5431	22.9615	34.0835	36.3941	28.5251	37.9638	25.6084	14.6316	7.22266	6.29498	12.3592	13.5518	18.7456	16.2425	13.6707	4.18381	8.99537	19.4259	16.0534	4.79776	16.1874	13.9816	3.03287	12.561	20.701	11.1389
0.86_344.9923m/z	344.992	0.864583	0.00836396	0	0.508949	0	0.272004	0	0.560974	0	0	0	0	0	0.0492033	0	0	0	0	0	0	0	0	57.6358	65.3857	60.3802	56.4474	60.4596	42.7425	46.806	41.3627	40.2991	34.5232	42.2195	20.9908	25.6725	24.3584	21.0224	23.1601	21.2576	24.4038	23.1107	25.4694	34.1548	91.1209	18.3209	52.9811	82.6911	62.322
4.12_668.4452m/z	668.445	4.11757	0	0	0	0	0	0	0	0.372001	0	0	0.362534	0	0	0	0	0	0	0	0	0	0	19.9626	24.5121	31.4649	38.4133	27.6686	25.5558	21.7002	19.7682	23.6928	16.0965	21.9696	19.6021	20.9434	20.139	16.7664	17.0987	17.3271	14.0314	10.6349	9.4745	14.4607	37.3535	5.84319	9.20933	40.3298	8.95477
6.89_104.1075m/z	104.108	6.89212	10.7031	4.81381	3.04793	5.52563	2.95278	2.27183	2.27051	3.0884	2.54283	5.82649	13.6591	20.4485	2.22155	2.18775	1.33465	3.2599	2.87903	1.7553	0.682304	6.63118	1.24523	4.45088	5.22855	2.26696	4.68376	1.53472	1.40289	3.5538	2.24153	2.31447	2.57166	3.26831	2.06923	5.67576	3.92865	2.38077	1.5039	3.00603	1.27729	5.62292	1.95106	4.84202	1.8784	2.29367	4.47085	2.38616	4.78249
0.86_990.7343m/z	990.734	0.864583	1.86774	0	0	3.17798	0	1.43475	0	2.36439	1.90259	1.27396	0	0	0	0	0.582856	1.41321	0	0.869263	0	0	0.2688	767.097	696.552	760.183	693.534	765.449	518.851	549.244	511.221	573.07	443.407	485.029	282.569	298.469	401.254	374.735	312.151	335.424	337.43	332.615	331.097	376.743	838.681	94.2198	709.856	795.112	451.894
1.18_185.0326m/z	185.033	1.18482	2.56962	2.57281	2.88867	1.76994	0.960145	1.18509	1.55796	1.15747	1.3595	1.5669	1.44929	0.00547723	0.70269	0.00070765	0.138704	0.690906	0.395707	0.516106	0.576962	0.495093	0.633389	818.986	781.978	805.17	801.333	823.21	699.83	703.537	649.481	662.555	602.67	602.023	466.637	422.975	396.277	401.304	354.597	375.146	392.674	418.411	364.799	377.443	1063.1	490.698	856.892	950.893	680.756
1.17_375.0123m/z	375.012	1.174	0	0	0	0	0	0.313559	0	0	0	0	0	0	0	0	0	0	0	0	0	0	0.309742	17.7282	17.6419	19.7073	23.3916	13.8519	14.4237	15.935	10.5588	11.0094	4.82658	10.9613	8.03067	5.3713	5.7904	4.3293	4.39682	3.00677	1.20902	1.24975	6.62886	3.16034	14.4095	16.3526	42.2068	19.256	20.5361
1.14_467.0253m/z	467.025	1.13618	0	0	0	0.491653	0	0	0	0	0	0	0	0	0	0	0	0	0	0	0	0	0	13.7885	18.8268	17.5269	16.8939	11.0483	16.9164	22.8824	14.5067	15.3154	19.2097	15.9425	10.4281	3.4444	3.6542	11.3556	5.79103	7.37296	5.43346	4.98284	4.24784	4.36267	10.1381	10.6624	20.8239	15.3711	25.6864
2.87_376.1905m/z	376.19	2.87237	0	0.326645	0	0	0.192975	0	0.276123	0	0	0	0.433136	0	0	0	0.297104	0	0	0	0	0.411957	0	115.023	99.7158	120.924	98.7384	104.346	82.9715	82.5969	70.2289	91.9723	60.0054	66.5086	37.9349	44.1997	60.223	51.5873	41.7151	47.0867	41.2685	45.2041	55.9632	42.6814	267.013	14.9799	33.6005	229.36	40.8496
1.86_184.0610m/z	184.061	1.85767	1.0848	0.175419	0.0800629	0.492425	0.583687	0.118607	0.283081	0	0.270439	0	0.165017	0.157097	0.163109	0	0	0.432035	0	0.329039	0	0.0832034	0.0721465	186.468	181.748	181.04	178.217	171.393	178.423	166.482	165.162	164.415	139.264	144.746	115.244	82.0121	93.7554	92.5394	84.8647	96.4257	87.8358	92.2494	99.2025	98.4194	332.49	51.9041	115.828	226.984	269.801
0.90_258.1189m/z	258.119	0.897017	0.000575664	0.0574871	0.674978	0.637509	0.4781	0.595675	0.362127	0.32542	0.233716	0.345475	0.777873	0.120755	0.210754	0.0760794	0.522997	0.275775	0.468459	0.614689	0	0.107924	0.0540295	306.153	289.78	308.68	280.749	286.517	263.62	238.649	220.714	214.172	184.141	195.433	154.862	148.04	160.104	149.234	137.602	128.286	142.752	137.582	139.05	155.468	436.999	192.805	259.705	367.441	235.84
5.09_399.1500m/z	399.15	5.08567	0.294462	0.546866	0.000378442	1.20599	0.73704	0.668472	0.249916	0.196655	0.38461	0.209473	2.59774	0.435319	0.366797	0	0.289864	0.445343	0	0.588098	0.480164	0.379957	0	381.187	367.92	363.12	371.501	382.323	329.807	302.513	288.994	304.317	269.25	275.929	279.045	299.869	308.839	258.187	269.816	271.231	249.872	242.399	283.331	253.685	428.819	87.8354	293.502	510.319	437.706
2.83_657.8991m/z	657.899	2.83115	0	0	0	0	0	0	0	0	0	0	0	0	0	0	0.347687	0	0	0.202148	0	0	0	31.7766	27.142	29.9389	24.9516	30.8605	20.3338	19.3442	27.6798	20.5889	20.6054	20.7743	6.21083	12.8728	17.5886	17.3659	10.0915	13.9296	6.98419	6.57428	12.1079	10.2681	121.712	2.44489	12.8262	31.8166	14.4819
0.88_856.8265m/z	856.827	0.8808	0.635139	0	0	0	0	0	0	0	0	0	0	0	0	0	0	0	0	0	0	0.632843	0	71.7605	68.6348	69.6431	92.0701	83.8161	43.6958	57.3982	67.7566	51.4286	55.4601	59.4238	28.4482	44.0405	50.3851	30.9671	19.4182	31.8834	32.0566	30.4731	16.7895	32.4409	89.0002	3.83466	48.2166	84.4615	57.7091
2.91_585.8887m/z	585.889	2.9102	0.179932	0	0	0.640533	0.988656	0	0	0.454742	0	0	0	0	0	0	0.529449	0.00321501	0	0	0.0421211	0.391357	0	164.415	194.337	187.868	173.221	167.794	156.344	140.315	120.316	130.547	113.249	113.575	87.9968	86.3674	78.2983	55.9779	81.5977	74.4846	57.9382	73.9729	91.9294	76.4725	371.911	20.381	71.8917	121.728	36.7885
0.85_893.7466m/z	893.747	0.853783	0	1.46378	0	0.674744	0.47113	0	0.852051	2.64264	0	0	1.14441	0	0	0	0.633698	1.28207	0	0	0	1.10583	0	600.557	562.398	585.991	531.56	544.725	375.562	435.706	391.4	384.081	322.74	311.925	204.215	224.67	295.818	264.159	227.009	203.896	247.984	250.766	221.111	281.882	606.624	64.9957	459.289	579.593	315.143
0.92_311.0702m/z	311.07	0.922017	0	0	0	0.00966814	0	0	0.678355	0.13703	0	0	0.346266	0	0	0	0	0	0	0	0	0	0	61.1686	58.8848	53.1649	62.3578	64.6938	40.7644	36.2791	32.6323	31.4971	33.6507	36.5563	24.3586	34.5841	30.8087	28.1493	20.2196	23.1139	25.4401	19.0182	20.5605	25.9509	76.9479	18.6655	41.0256	71.2902	30.9593
1.36_204.1347m/z	204.135	1.35573	0.887573	0.410534	3.19837	1.98952	2.25189	2.45036	2.91084	1.43621	0.905136	0.503211	0.176007	0.00429039	0.8035	0	0.449065	0.568743	1.15558	0.121662	1.67718	1.2582	0.875279	1081.29	1050.21	1078.03	1054.38	1077.29	907.926	950.107	880.172	906.442	826.967	811.831	632.212	510.137	502.714	518.156	481.283	496.734	518.517	544.423	483.257	506.986	1015.79	269.71	1036.64	1700.18	1066.74
0.89_945.9629m/z	945.963	0.891617	0.617619	0	0	0	0	0	0	0	0	0	0	0	0	0	0	0	0	0	0	0	0	38.9395	32.8476	36.8599	48.238	47.6766	23.3686	20.7488	12.7089	16.8846	9.17243	20.9281	13.4437	21.9536	20.759	14.4959	12.7356	13.0693	14.3404	15.159	7.96193	12.0638	38.9234	4.66629	14.8889	23.4552	7.33142
0.89_547.9312m/z	547.931	0.8862	0	0.728027	0	0	0.0260935	0	0	0	0	0	0	0	0	0	0	0	0	0	0	0	0	41.4883	39.4119	42.3825	39.1108	48.9857	21.1918	34.3934	30.0665	23.0769	25.7149	17.419	11.3007	11.9339	12.4392	12.1723	12.8603	10.203	11.0097	17.1186	8.49581	18.0154	51.4976	17.6119	18.2905	28.557	22.1189
0.86_412.8510m/z	412.851	0.859183	0.506656	0.0364075	0	0	0	0	0	0	0.489273	0	0	0.160141	0	0	0	0	0	0	0	0	0	69.9524	62.6615	50.0375	50.9876	51.9424	33.1867	45.028	41.8794	40.5245	34.6119	31.8607	16.7088	21.66	24.4814	24.5281	13.8994	17.2802	18.5034	20.9485	19.79	16.4655	45.7447	8.05704	80.4574	70.6957	38.4947
1.00_717.2915m/z	717.291	0.997683	0	0.0170847	0.304687	1.4467	0.578461	2.08484	0.743919	0	0	0.76555	0	1.55169	1.17096	0	0.542567	0	0	0.421875	0.560267	0	0	531.276	506.664	557.174	524.421	562.028	466.842	486.271	415.171	437.411	386.915	383.161	253.123	187.601	182.955	179.401	178.048	182.766	156.249	163.672	158.338	164.123	319.811	160.042	360.265	1106.6	78.1305
3.80_865.8085m/z	865.809	3.79723	0	2.68065	5.85974	3.28121	3.0603	1.83893	4.03354	2.77973	2.39064	2.67619	1.22156	1.63403	0.276886	2.71457	1.92964	5.72075	0.386353	0	0.399667	4.61902	2.39774	2065.32	1977.48	1892.5	1981.77	1925.41	1823.6	1710.25	1690.73	1753.28	1547.27	1496.46	1337.19	1442.35	1276.52	1214.78	1250.05	1173.96	1253.61	1246.6	1290.58	1171.46	5258.88	830.833	917.532	1669.41	906.869
0.86_620.7762m/z	620.776	0.864583	0.446259	0	0.201691	0.39212	0	0	0	0	0	0	0	0	0	0	0.566528	0	0	0	0	0	0	100.564	86.4304	99.5802	83.6246	99.7347	56.8554	75.2979	69.3777	72.7181	62.568	61.5212	27.4984	32.9516	46.2932	44.3677	23.6005	27.2745	31.5011	33.0598	23.7997	36.3241	66.7521	7.41127	69.2387	88.6176	65.0012
2.06_252.0907m/z	252.091	2.06102	0.0949068	0	0	0.429818	0	0	9.23712e-05	0	0	0.00455173	0.298508	0	0	0	0	0.547133	0.236488	0	0	0.100575	0	87.8567	87.4174	77.8904	93.1107	92.7136	71.668	73.488	63.8774	70.3735	49.69	56.3695	46.6748	29.1833	35.1299	35.3116	36.1069	36.7554	31.2186	38.5319	41.4772	42.8401	310.223	25.7941	57.607	82.0041	43.0504
2.66_507.4937m/z	507.494	2.66022	0	0	0	0	0.289904	0	0	0	0	0	0	0.438065	0	0	0	0	0	0	0	0	0	45.6658	44.115	29.2159	51.4489	37.8489	29.8268	29.0118	22.368	29.8549	22.957	16.6089	12.0852	13.0763	12.0123	12.5939	9.79718	15.733	12.1289	12.1494	17.487	9.08407	146.531	8.46632	15.0427	83.4919	24.8022
5.57_559.2758m/z	559.276	5.566	0	1.94534	3.10844	1.02185	0.175903	1.89102	1.90516	3.7527	0.622945	1.70394	2.39818	0.854422	2.15432	0	2.21317	4.03803	0.304141	0	0.573265	1.23314	0.939255	1124.59	1097.68	1078.96	1111.52	1070.79	986.283	952.354	930.081	975.219	921.342	986.189	956.183	895.762	878.523	831.049	838.337	811.704	755.264	857.021	847.403	819.038	2391.58	329.277	698.361	1528.17	1223.54
1.14_172.0973m/z	172.097	1.14158	1.25369	0.213043	1.2805	0.643906	0	1.02856	0.624602	0.00306355	0.226395	0.25524	0.0327797	0.780149	0.55131	0.694052	0.065918	0.147214	0.150084	1.00634	0	0.372627	0.00256692	417.978	397.529	393.133	369.399	421.554	340.216	367.361	337.362	336.857	304.163	319.467	234.414	187.432	194.2	202.336	186.531	219.558	211.88	218.882	203.03	192.663	1205.98	204.095	293.73	659.953	220.338
4.87_386.2168m/z	386.217	4.86612	1.75766	0.395577	1.02257	0	1.24425	0.576155	0.273071	0	0.481537	0.895566	1.46199	0.63147	0.567673	0.781601	0.737885	1.02145	0	0.768982	0.0042337	1.16028	0	578.086	565.591	565.117	563.323	565.541	496.014	475.858	465.717	466.491	427.166	468.811	455.216	444.745	448.182	442.903	384.352	372.244	379.624	410.371	431.771	384.435	1039.85	139.374	208.638	1217.99	350.137
2.65_530.0531m/z	530.053	2.65482	0	0	0	0	0	0	0	0.230001	0	0	0	0	0.431824	0	0	0	0	0	0	0	0	35.5999	35.1735	31.5488	36.5593	48.1475	20.8556	30.0932	14.3051	22.9047	12.6839	23.1276	8.30564	14.8905	19.322	18.0677	11.3364	11.3905	14.0579	15.1352	14.5062	5.89766	119.703	12.021	15.8671	53.4852	8.65552
3.35_747.3325m/z	747.333	3.34932	0	0.0252985	0	1.96994	0.567078	0.504844	0.916049	0	2.05728	0	0.382263	0.034882	0.92038	0	0	0.388794	0.103152	0.483612	0	0.244211	0.0194788	375.415	375.714	361.366	366.017	376.115	300.444	312.783	300.559	300.572	266.23	245.519	204.195	211.803	195.216	208.365	197.125	185.742	200.598	183.464	228.686	177.037	1195.38	70.9463	133.934	660.426	191.774
0.82_610.6560m/z	610.656	0.82135	0	0	0	0	0	0	0	0.391566	0	0	0	0	0	0	0	0	0	0	0	0	0	17.8376	15.6427	17.6864	25.7275	17.1159	10.9306	16.1133	11.9125	9.25607	10.1783	8.60027	9.86457	4.23673	2.85659	10.236	5.03971	2.69429	5.41585	2.40866	7.02725	3.28252	38.8309	2.64038	10.6612	24.9533	7.25578
0.88_449.8666m/z	449.867	0.8808	0	0	0.00113458	0	0	0.477936	0	0	0	0	0	0	0	0	0	0	0	0	0	0	0	30.3839	32.6962	32.237	34.6801	31.0733	16.7698	26.9872	20.7904	21.8457	14.2862	17.9644	11.3861	12.4816	9.38637	7.49502	5.75361	10.796	8.48473	9.07079	6.46663	6.19711	47.2839	1.71147	17.4167	41.1564	16.4546
4.88_442.0951m/z	442.095	4.87692	0	0	0.102653	0	0	0	0	0	0	0	0	0.0537721	0	0	0	0	0	0	0.30071	0	0	28.0867	15.6832	23.3496	20.4562	15.9312	20.074	13.6109	13.6713	16.9324	10.8485	14.8056	10.7011	11.5966	12.5759	10.0969	11.3448	9.05094	9.87712	11.9751	8.65111	10.1672	93.2733	3.93765	24.319	22.8682	12.5937
5.61_297.2212m/z	297.221	5.60923	8.09709	5.01911	5.20265	4.78182	2.79249	5.30411	6.72608	5.53985	3.94934	2.46997	2.12622	3.99165	2.25908	1.41748	9.12053	12.3057	5.87443	4.47365	4.56694	3.77724	3.27846	4016.07	4124.73	3970.49	4000.76	3918.82	3208.36	3237.7	3011.97	3288.18	3087.03	3272.76	3027.24	3138.69	3187.58	2992.27	2714.07	2670.04	2639.83	2940.26	2876.28	2764.33	9261.42	599.258	3192.61	8623.81	5109.95
4.32_360.0705m/z	360.07	4.31552	0.298957	0	0	0.751092	0	0	0.261475	0	0.436616	0	0.0730342	0	0	0	0	0	0	0	0	0.157639	0	83.1729	79.9261	80.338	86.7989	83.637	79.2168	74.4794	62.4535	59.7098	60.4464	63.6317	66.296	38.9677	51.7591	54.9694	49.7451	40.8396	37.3242	45.54	47.2245	38.1403	122.863	32.1629	66.1573	93.0713	82.6175
1.01_212.1033m/z	212.103	1.01388	0.137592	1.22572	1.17477	1.65191	0.55012	1.54919	1.68353	0.619326	1.93046	1.53182	0.592175	1.04775	0.0893517	0.0868032	0.720827	0.990942	0.335899	0.321461	1.13127	0.0287445	0.0975887	797.796	751.435	783.384	756.156	783.949	672.463	682.855	578.88	613.88	553.568	578.412	424.951	387.081	360.019	365.306	325.416	327.861	357.895	344.083	349.247	332.66	1579.92	345.453	434.371	1147.59	420.802
1.10_643.0460m/z	643.046	1.10375	0	0.365723	0	0	0	0	0	0	0	0.17436	0	0	0	0	0	0	0	0	0	0	0	34.7376	24.5255	31.5908	25.1305	30.2331	21.5547	17.9143	18.6228	19.5846	17.7095	21.6815	9.23931	10.048	9.87671	14.1206	12.1936	7.49369	10.9255	14.508	11.3527	13.0778	22.8592	17.6775	14.6428	23.7876	25.1089
3.94_190.0505m/z	190.051	3.94113	3.42866	2.84634	2.05799	4.05786	3.29149	4.44096	4.48671	5.70247	2.45807	2.79022	1.91163	3.29658	1.70655	2.817	3.2505	2.68708	2.05825	2.5335	1.30404	2.00653	3.06223	2306	2235.47	2215.92	2208.39	2195.63	2069.76	1937.16	1886.55	1955.95	1652.72	1793.54	1802.18	1710.36	1671.06	1675.3	1539.32	1508.41	1547.74	1549.35	1793.72	1457.16	5052.38	908.909	2051.54	2428.63	3102.68
0.86_873.2452m/z	873.245	0.859183	0	0	0.555847	0	0	0	0	0	0	0	0	0	0	0	0	0	0	0	0	0	0	43.662	34.4938	35.4934	29.0793	31.0609	17.3501	25.1509	9.14351	18.9353	16.7571	15.8773	10.5381	12.2103	7.7836	19.1535	9.91672	8.34083	12.4238	14.062	14.6569	13.5337	40.0617	3.68098	14.4635	29.04	10.3145
1.00_612.2600m/z	612.26	0.997683	0	0	0	0	0	0.465027	0	0	0	0.00013056	1.06062	0	0	0	0	0.686388	0	0	0	0	0	115.596	125.23	118.048	116.575	120.189	99.0504	103.522	89.1817	95.9759	85.2324	83.6277	59.1005	38.5431	35.2012	41.3426	35.8849	37.864	33.6031	26.6031	28.8072	41.0936	385.33	44.6905	83.3361	289.666	79.4132
5.51_347.2210m/z	347.221	5.50655	5.4323	6.19381	8.18631	3.79003	2.91736	4.81527	3.67453	3.69368	1.90016	2.53556	2.77755	2.97304	2.54058	1.08514	3.55126	2.60779	4.22124	4.23919	2.68911	1.12134	1.23817	2511.81	2617.19	2446.18	2388.56	2398.72	2080.28	2016.09	1904.47	2071.14	1895.43	2069.63	1968.48	2091.18	2184.47	1943.21	1875.98	1792.24	1866.02	2005.74	1979.3	1882.99	5493.91	429.165	1913.42	4534.53	2423.16
0.89_734.9297m/z	734.93	0.891617	0.520758	0	0	0	0	0	0	0	0	0	0	0	0	0	0	0	0	0	0	0	0	31.5399	29.4247	26.3189	38.1903	26.0571	15.6347	28.9576	20.2246	20.9865	15.8194	17.6735	11.8836	14.8587	17.0475	8.65126	7.30349	13.196	10.2059	7.66059	4.63214	9.56387	32.3249	6.61498	15.4247	32.5968	7.17209
6.22_453.7859m/z	453.786	6.21725	9.90445	4.89015	3.79623	40.8764	10.526	7.66764	37.1705	5.01435	17.2175	28.0849	17.3488	12.236	1.81188	3.01642	10.6554	8.65572	0	2.04201	7.60913	8.56631	8.84109	1.35828	10.7418	21.3312	37.6558	47.2339	41.5756	5.72006	4.49274	17.5438	3.28941	6.67112	0.824432	4.35092	0	0	0.138678	0.945053	0.0210858	1.8488	0	1.36147	33.4952	47.2321	9.5728	46.7942	15.4208
2.90_737.9885m/z	737.988	2.89938	0.755148	0	1.06276	0	0.652924	0.00851396	1.63223	0.938434	0	0	0	0	0.676666	0.0528442	0	0	0	1.02704	0	0	0.206796	334.237	338.305	328.364	303.917	307.583	288.481	284.01	269.418	259.959	244.103	223.584	177.546	180.095	158.148	169.503	167.421	149.67	148.231	148.709	176.707	158.23	922.565	80.8454	161.333	432.435	149.943
1.11_515.1223m/z	515.122	1.10915	0	0.0218033	0	0	0	0	0	0	0	0	0	0	0	0	0	0	0	0	0	0.471466	0	45.2832	39.1529	39.313	34.731	33.0808	30.0298	27.0151	23.0059	19.5703	20.4591	23.5759	17.6143	5.42016	12.4436	10.6314	11.2753	11.4425	9.25789	11.4366	9.60139	9.51757	71.3653	14.9204	24.8494	70.105	21.3904
3.51_875.3611m/z	875.361	3.50943	1.05627	1.55132	4.64956	0.994385	7.52368	3.57738	5.23732	6.88452	5.33452	0	3.23715	1.12579	0	1.31073	4.75486	2.95069	0	1.33133	1.82897	1.1322	0.23694	2045.66	2078.63	2098.47	2091.83	2056.83	1659.91	1743.15	1596.18	1740.01	1413.1	1437.51	1243.85	1233.03	1295.34	1213.78	1171.66	1112.12	1128.75	1063.39	1265.09	1137.76	6751.02	441.609	875.544	5293.79	1165.61
1.22_433.9790m/z	433.979	1.22263	0	0	0.361922	0	0.224094	0	0	0	0	0	0	0	0	0	0	0	0	0	0	0	0	32.0911	34.4285	39.6068	28.5527	28.9217	25.1674	20.0974	17.91	19.439	15.3909	20.0702	5.73214	11.4751	9.12808	11.8787	8.785	9.60926	10.3376	8.9771	8.98492	8.06839	62.0816	3.81785	7.15002	31.0864	4.51298
3.80_254.1020m/z	254.102	3.80263	0	0	0.0223515	0	0	0	0.00387254	0	0	0	0	0	0	0	0.0468396	0.226868	0	0	0	0.293585	0	35.6864	36.7459	29.4812	37.0406	37.2139	25.3628	25.7661	20.5184	25.8301	20.9539	22.4279	18.5305	15.8154	15.6744	16.949	13.2309	15.5169	14.734	13.4907	21.0651	14.0276	106.059	8.54963	9.90739	37.7509	19.6231
4.70_525.1930m/z	525.193	4.7006	0	0.136466	0	0	0	1.4905	0	0.42269	0	0.788701	0.600586	0	0.86498	0	0.986328	0	0.00474789	0	0	0.282446	0.511383	249.007	225.075	210.329	233.906	217.792	217.181	189.049	171.336	169.733	149.822	169.376	163.224	155.752	149.243	122.876	141.025	108.501	121.38	121.675	147.694	97.4502	768.37	26.3345	134.119	459.02	159.838
7.98_453.7859m/z	453.786	7.9751	14.4847	43.3278	43.6985	33.7758	20.7163	27.1254	14.1034	41.8276	14.8695	7.34829	16.8228	21.3967	8.02786	15.6559	30.5326	37.909	9.6449	9.40084	2.63852	15.5601	6.36136	19.2121	11.6777	15.2055	28.6666	23.9784	17.5249	26.5286	36.3253	14.0182	20.6523	14.7495	2.5786	19.0151	6.06083	7.46038	8.12644	25.3094	7.01142	4.8315	2.12588	7.74814	24.461	13.3558	6.58942	23.4661	12.0156
0.90_892.2721m/z	892.272	0.897017	0	0	0	0	0	0.369254	0	1.90689	0	0.861467	0	0.434313	0	0	0	0	0	0	0	0	0	173.167	159.173	147.94	157.728	149.185	119.967	118.149	127.214	126.23	105.757	88.5913	71.1373	72.0441	78.3492	74.8739	69.4656	68.5229	82.8384	70.1694	62.8071	83.7452	234.563	82.8711	163.288	192.454	127.728
4.46_551.9368m/z	551.937	4.45942	0.077737	0	0	0	0.508858	0.521234	0	0	0.113068	0.142584	0	0	0.646851	0	0.43689	0.393365	0	0	0.249336	0.0827387	0	105.877	113.04	126.226	121.734	116.224	105.26	100.526	90.4885	98.8597	91.6053	82.4509	86.292	105.779	93.278	85.3408	67.4943	83.302	85.8166	90.0312	87.6651	70.292	254.475	55.9681	60.3605	213.508	61.7943
2.54_696.6518m/z	696.652	2.54133	0	0.478729	1.29199	0.351837	0.302123	0	0	0.0658396	0	0.395782	0	0.15945	0	0	0.0764443	0	0	0	0	0.276855	0.00518592	144.025	148.285	136.803	142.043	134.135	125.063	116.712	113.495	121.866	101.534	109.903	94.1381	67.4672	69.8333	85.6158	76.0477	74.3351	67.7785	66.419	73.9773	64.8078	638.181	51.9208	85.1347	229.782	91.0256
3.76_621.4692m/z	621.469	3.7594	1.01095	0	0	1.13297	0.933619	0.638194	0.335687	1.84994	0.545288	0.207143	0	0	0.288727	0	0.0178925	0	0.250763	0	0	0.100729	0.39437	258.494	230.189	235.504	217.304	188.902	182.578	173.587	191.528	180.06	168.226	161.355	147.962	150.539	143.93	155.924	147.392	106.793	119.422	121.958	129.954	134.56	421.585	95.4535	165.505	281.333	182.322
0.90_685.9837m/z	685.984	0.897017	0	0	0	0	0	0	0.58429	0	0	0	0	0	0	0	0	0	0.411981	0	0	0	0	64.4632	65.1507	58.9478	66.3588	60.8023	39.3716	39.729	24.1337	39.041	26.5404	18.9633	26.8697	27.9578	31.2603	31.6522	16.9654	19.4916	17.4571	16.3432	14.4293	34.7237	60.9281	5.18788	32.2531	43.615	21.3571
0.90_1006.9549m/z	1006.95	0.897017	0	0	0	0	0	0	0	0	0	0.74295	0	0	0	0	0	0	0	0	0	0	0	40.4851	35.3127	41.4694	25.9246	34.3031	17.4751	20.0295	19.4089	13.3625	22.2522	14.5758	22.8011	9.25292	27.748	18.4745	12.6605	21.3213	19.3481	19.5018	18.3134	31.3147	61.5057	18.2327	17.7685	21.2522	23.4779
6.71_374.3259m/z	374.326	6.7104	24.2696	20.2951	20.7877	14.1932	16.3837	13.2956	14.2508	14.7151	17.8261	16.6381	20.3338	16.7991	16.9917	13.7369	16.832	16.368	18.496	11.9262	18.1468	9.2815	11.9365	13.2218	10.767	13.8534	13.2595	16.4636	9.47551	9.63135	9.25254	9.68362	9.00219	13.4287	17.816	16.2903	10.4794	15.9433	10.7641	9.1955	9.38989	9.11783	10.0581	5.69325	14.8292	12.7931	14.7616	9.7307	12.9593
6.66_176.9894m/z	176.989	6.65635	50.1568	53.7786	45.5288	41.8307	41.7762	33.5212	39.6935	47.8102	43.6797	56.3008	48.4924	53.3384	54.4787	43.253	62.6343	65.5386	54.821	54.7501	38.9386	36.9391	28.7246	31.2432	30.5611	28.7245	36.1162	33.6287	19.4417	26.8928	22.0571	23.395	24.0764	33.6245	46.7548	40.6355	42.5378	58.0732	40.3778	27.9656	31.6629	29.5237	36.6504	22.0557	30.2793	41.5523	38.1129	25.8382	34.4257
0.86_984.6853m/z	984.685	0.864583	0	0.678802	1.74091	1.96269	1.06982	1.21071	0	1.44196	0	0.480896	0	0.575775	0	0	0.672607	0	0	0	0	0	0	534.323	459.198	449.162	408.268	446.734	269.39	344.724	329.078	372.211	301.317	305.541	175.448	224.15	234.095	197.856	194.103	190.022	189.773	191.006	174.388	247.079	531.191	55.9656	439.499	550.365	351.074
0.93_672.1742m/z	672.174	0.927433	1.5376	2.13242	0	0	0	0	1.63341	0.362355	0	0.266083	0	0	0.92235	0	0.982262	0.0123174	0.402283	0	0.748566	0	0.657206	460.958	427.593	452.566	411.757	426.64	368.265	331.794	297.452	290.509	274.902	282.287	239.555	206.187	223.364	210.445	205.384	210.32	210.232	213.786	196.965	212.059	524.835	204.297	476.265	898.689	248.934
3.25_736.6734m/z	736.673	3.25203	0.273454	0.927063	1.0802	0.913727	0.792232	3.11161	1.40468	0	0	1.48912	3.90743	0.332642	0	2.1488	2.08366	1.56702	1.14855	0	0.451752	0.154602	0.897644	890.227	875.787	884.644	899.913	892.319	764.281	791.102	760.501	748.568	648.626	668.472	565.015	584.022	512.79	543.645	501.488	463.718	501.645	496.349	531.08	494.288	2571.45	280.536	481.151	1296.61	523.861
0.89_556.9542m/z	556.954	0.891617	0	0	0.107183	0	0	0.690623	0	0	0	0	0	0	0	0	0	0.273962	0	0.693115	0	0	0	96.4028	116.724	105.334	105.129	121.024	69.9836	67.7158	73.3765	62.6678	51.8034	65.0061	46.5213	42.6313	54.6092	43.9057	38.6644	38.8826	26.3265	40.5162	32.0348	48.7852	118.239	20.0411	82.4623	85.0493	44.0165
4.58_475.1332m/z	475.133	4.58372	0.00068988	0	0.343567	0.390991	0	0	0	0	0	0.252319	1.10749	0	0	0	0	0.615128	0	0	0	1.02191	0	122.162	154.221	135.916	129.957	139.141	103.113	111.709	91.6433	102.769	60.2807	73.3071	62.7071	83.4514	97.9868	76.2472	75.067	45.1038	72.5429	59.1482	68.2747	55.3816	168.693	7.42279	39.6035	115.667	77.5452
1.60_369.0424m/z	369.042	1.6023	0	0	0.151306	0	0	0	0.0856238	0	0	0.100062	0	0	0	0	0	0	0	0	0	0.302505	0	40.6811	39.8698	33.7604	40.1146	37.0831	29.3529	31.2482	23.2891	23.0701	21.4667	25.5012	13.5817	12.2885	12.5527	14.5979	10.5896	10.6838	16.6293	9.00707	14.2306	12.1125	122.261	21.7827	29.5435	51.0724	35.3743
0.86_1197.1921m/z	1197.19	0.864583	0.681152	0	0	0	0	0	1.16553	0	0	0	0	0	0	0.757534	0	0	0	0	0.00681966	0	0	127.365	147.324	119.156	137.15	143.418	86.3719	115.956	81.3653	103.057	78.9707	69.9941	42.1413	62.032	59.2591	63.2187	58.4195	81.4557	57.6957	54.8347	60.9703	68.4881	145.67	19.0267	120.661	132.372	67.6999
5.63_375.2144m/z	375.214	5.62543	0.894253	0.537827	0.287979	0	0	0.663988	0.914398	0.531677	0.152748	0	0	0.978027	0	0.355943	0.601059	0	0.503448	0	0	0.417607	0	219.617	212.418	204.418	190.256	218.687	174.029	229.399	182.02	185.541	186.011	212.828	261.361	212.288	225.264	203.326	198.954	193.227	194.641	203.573	209.084	207.138	606.037	67.8474	140.629	329.273	224.659
0.89_254.9886m/z	254.989	0.8862	0	0.213845	0	0.223633	0	0.550707	0	0	0	0	0	0	0.46223	0	0	0	0	0.171394	0	0	0.12092	71.3704	78.4709	72.2142	59.982	72.9841	50.4688	46.3244	45.581	48.2812	37.9039	37.0229	31.319	34.932	37.9004	41.6802	33.5835	27.8871	35.969	37.3813	33.0153	38.8585	96.9787	11.9994	63.8228	77.5991	32.1651
2.57_151.0621m/z	151.062	2.57377	2.71696	3.98418	5.0847	4.00563	3.37055	3.49432	3.77835	3.93684	2.32614	2.54369	3.10365	4.62373	2.8969	4.13194	4.72346	5.93091	2.40093	3.72406	3.46972	6.6788	3.5301	3170.56	3187.54	3209.11	3206.6	3188.65	3057.54	3082.63	2911.45	2989.21	2651.91	2698.33	2145.2	1780.42	1728.5	1730.37	1706.44	1614	1703.88	1701.92	1727.76	1638.88	6307.69	93.0039	2925.7	4792.28	3025.15
6.39_453.7854m/z	453.785	6.39357	16.125	11.7805	25.5201	58.3953	20.1286	12.9017	2.12862	14.839	15.2331	10.4386	9.96353	12.3297	2.71335	4.03135	5.68299	3.49827	4.67862	2.40185	0.498444	4.94218	0	2.31482	46.4311	31.6999	14.2337	14.3542	16.5117	3.13997	7.75586	3.63852	6.39668	15.0473	11.127	15.0254	0.219107	0	0	1.62134	1.2718	1.86825	0	0.934866	8.7707	14.9382	25.21	28.7282	60.1667
0.86_1050.6882m/z	1050.69	0.859183	0.25644	2.10193	1.12329	2.00328	0.794434	1.92529	0.93457	0.510864	1.41095	2.21419	0.528451	0.764012	0	0	0.815735	0	0	0	0	0.510734	0	749.044	751.866	749.161	717.477	720.557	477.831	510.673	491.743	477.99	415.419	425.76	286.452	294.289	371.228	377.918	306.661	337.244	358.418	334.459	294.627	365.381	801.824	87.8577	768.698	846.089	445.942
4.89_557.2655m/z	557.266	4.88773	2.76765	3.52939	0	1.49844	0	3.9117	1.05085	1.09805	3.07166	1.02151	0	1.64792	2.88448	1.91669	3.25319	0.9179	0	3.47415	1.78802	2.52467	0.985077	1365.63	1332.39	1347.46	1337.42	1357.44	1198.85	1110.16	1128.86	1099.19	972.13	1056.92	1052.67	1077.18	1078.23	978.152	960.509	929.788	877.698	953.978	994.546	941.216	2643.82	597.008	882.065	2743.71	808.425
0.89_249.0423m/z	249.042	0.891617	0.442434	0.433438	0.698253	0	0.400909	0	0.23848	0	0	0	0	0	0	0	0	0	0	0	0	0	0	83.6242	86.3332	87.0545	77.9344	88.4638	75.4165	77.4262	75.3215	76.5796	56.7325	59.3497	51.9904	58.5326	48.5649	50.5535	49.0307	50.153	46.3974	45.3669	42.9991	47.6655	95.7357	36.8901	56.4386	132.351	70.9263
4.68_423.1564m/z	423.156	4.68438	0.175593	0	0	1.11934	0.175874	0.765405	0	0	0.521591	0.0152709	0	0.65063	0	0	0.548279	0.404602	0.517075	0	0	0	0	225.296	189.403	191.151	181.731	188.869	166.287	158.88	145.46	157.613	141.452	146.862	152.005	147.229	151.025	117.184	138.146	107.35	121.417	121.765	144.252	115.448	276.743	81.2606	123.66	267.614	173.044
6.56_127.9782m/z	127.978	6.56448	326.877	281.489	296.831	294.136	216.728	201.308	207.817	201.918	241.513	257.538	414.426	445.619	375.364	192.501	287.19	432.543	342.439	339.999	342.679	227.725	199.409	198.558	207.916	208.636	234.078	228.428	194.519	164.087	168.57	140.631	117.744	194.882	285.816	281.628	221.409	313.46	227.034	167.934	225.188	163.673	199.065	179.667	183.869	280.274	284.524	201.211	228.194
0.86_512.7853m/z	512.785	0.864583	0	0	0.233093	0	0	0	0	0	0.715164	0	0	0.743958	0	0	0	0	0	0	0	0	0	82.5039	80.9178	73.0007	83.3366	81.1785	54.4235	66.302	52.6209	59.6044	46.026	51.7792	25.0349	24.7928	24.0268	35.0888	21.2336	20.9533	21.6232	22.22	25.0516	27.3103	77.813	1.82804	129.018	106.731	88.4444
0.87_610.7280m/z	610.728	0.87	0	0	0	0.324097	0.480743	0	0	0	0	0.577972	0	0	0	0	0	0	0	0	0	0	0	69.6202	71.7401	60.741	61.2671	54.9882	43.2011	54.0095	47.1965	36.1021	29.8854	36.9421	20.9937	17.3251	18.8252	25.0467	15.5315	17.859	25.5007	17.5695	17.1443	27.3016	65.3986	5.32662	45.8834	81.3874	59.8417
0.93_1000.0072m/z	1000.01	0.927433	0	0	0	0	0	0.567505	0	0	0	0	0	0	0	0	0	0	0	0	0	0	0	34.6264	35.0049	36.5059	32.6173	45.0856	33.5584	18.0724	12.6702	10.9241	6.37856	13.9306	9.24395	30.5536	11.2457	19.8202	5.68798	15.0605	13.3766	15.0107	3.58696	8.78068	23.3815	3.35093	14.2246	58.3807	5.2477
5.90_267.6218m/z	267.622	5.89703	0	0	0	0	0	0	0	0	0	0.260895	0.131964	0	0	0	0	0	0	0	0	0.336823	0	23.4963	19.9433	25.0602	27.5194	23.7498	14.1299	23.2237	19.1729	18.1577	19.6117	22.9684	23.6104	18.7003	26.8233	16.9297	23.3655	15.8318	18.2721	20.3483	16.9728	16.6545	13.8844	13.9823	11.345	21.3805	24.7104
1.04_609.2721m/z	609.272	1.0355	2.18846	0.616926	1.35422	0.744751	0.885376	0	0.566711	0	0.3673	0	0	0.124237	0	0	0.426361	0	0	0	0	0	0	346.77	327.977	361.511	319.639	326.258	266.681	281.261	238.832	243.809	216.777	193.403	151.285	137.393	133.716	141.897	121.277	137.512	122.088	139.641	132.679	140.644	778.153	149.486	224.762	529.726	211.336
3.00_460.0975m/z	460.098	3.00207	0	0	0	0	0	0	0.404663	0.365509	0.507782	0	0	0	0	0	0	0.0654604	0.468948	0	0.439953	0.582718	0	152.853	151.388	149.209	145.422	142.227	107.977	101.532	93.868	101.481	85.9314	92.0167	54.0622	70.3268	67.4431	65.943	67.9911	55.5589	54.787	62.2786	84.6077	58.4564	525.062	48.1593	217.478	231.023	131.678
1.03_587.2278m/z	587.228	1.0301	0	0.00393435	0.0227652	0.211639	0	0.699005	0	0.461243	0.477279	0.0782397	0	0.0180768	0	0	0.46637	0	0	0	0.509476	0	0	129.59	121.534	125.417	124.133	120.299	104.717	125.09	103.593	99.2019	100.449	98.3262	59.2209	30.4027	34.5729	52.6909	35.4916	39.1145	33.8661	39.6973	32.7655	35.3111	245.114	83.6426	79.0754	170.325	84.307
3.58_293.1130m/z	293.113	3.57767	0.598145	3.6437	0.456528	0.224701	1.56951	0	1.01357	1.94483	0.493515	0	0.396576	0	0	0.516083	1.06235	0	0.468008	0.989775	0.711975	0.646927	0.359222	610.969	545.213	562.264	567.206	555.141	508.067	481.996	485.002	490.045	419.312	450.368	393.243	403.601	412.396	418.075	390.845	380.587	370.301	360.843	414.029	357.689	1488.6	167.492	357.287	920.209	320.312
5.36_363.2161m/z	363.216	5.35725	2.40812	3.93169	3.55377	4.0975	2.3786	0.966675	3.19677	4.09128	4.46012	4.17337	0.986882	2.72456	1.11591	0.137878	4.39666	2.3211	2.60333	1.19272	1.20982	0.600418	2.90361	1742.59	1832.73	1782.13	1737.36	1736.67	1588.28	1453.5	1411.04	1435.48	1388.47	1539.89	1438.92	1522.61	1499.48	1416.12	1312.14	1279.1	1302.6	1343.12	1447.87	1320.91	3032	576.128	1355.06	2149.7	1831.35
0.99_733.2852m/z	733.285	0.986867	0	0	0	0	0	1.96906	0	0.375199	0	0	0	0	0	0	0	0	0	0	0	0	0	85.4762	89.3803	102.461	83.6957	101.379	80.2591	88.0895	74.0226	73.4728	66.9514	72.6511	52.5104	35.2234	32.9365	44.586	29.0149	33.0606	32.1851	28.7995	27.8106	34.0231	109.099	80.2838	34.7969	112.02	23.0883
7.28_192.9777m/z	192.978	7.27522	42.279	38.3004	37.2589	27.7432	28.8711	12.0961	29.2106	33.5221	22.2255	35.26	35.3875	11.128	7.5437	25.9049	25.2439	2.73387	3.38863	8.10752	20.915	3.17056	2.55351	27.0703	25.571	31.572	29.1231	33.0483	34.1891	32.1957	13.3855	30.0494	26.2679	16.7814	3.3305	18.9703	14.9968	1.07418	4.43856	4.61667	10.0722	1.0742	2.12748	1.50038	29.0831	29.0704	28.3806	35.1504	28.9468
0.84_459.0939m/z	459.094	0.842967	0	0	0.0990442	0	0	0	0	0	0	0	0	0	0	0	0	0	0.198355	0	0	0	0	20.503	14.5112	11.1239	14.7268	12.6372	13.9162	12.1124	6.21126	5.85059	8.56606	13.3395	7.25892	5.66624	4.85361	6.34549	3.10472	2.61999	5.5571	2.05707	3.05947	4.98437	26.4777	5.43895	10.0566	20.8399	3.23852
0.93_765.1811m/z	765.181	0.932833	0	0.430054	0	0.564111	0	0.797607	0.168026	0	0	0	0	0	0	0	0	0.544708	0	0	0	0.205536	0	124.102	116.902	109.696	100.29	107.242	107.291	81.6322	82.0173	78.4706	81.9537	70.1354	49.9628	39.7752	47.9343	41.0953	37.4235	32.0635	33.7666	43.5358	42.0222	48.1476	145.038	25.2561	71.8159	149.297	38.872
3.25_552.7564m/z	552.756	3.24663	0	0	0	0.488617	0.534973	0.517909	0	0	0.437384	0	0	0	0	0.209895	0	0	0	0	0	0.292432	0	128.642	113.378	121.016	110.103	105.471	100.461	92.1352	98.8159	113.829	71.0909	96.5184	62.8519	79.3273	63.6854	70.1241	56.4311	51.489	47.5139	38.8143	65.1641	43.9679	299.958	26.1238	48.1713	170.152	45.4684
2.90_738.6561m/z	738.656	2.90478	0	0	0.711203	0.107669	1.01538	1.24756	0	0	0	0	0	0	0	0	0	0	0	0	0.0161693	0	0	142.682	136.807	143.982	137.688	141.218	112.753	121.183	119.975	113.402	101.847	95.8138	64.5783	72.8598	64.8356	79.6352	74.9434	59.8755	61.718	59.7639	79.1968	54.6465	424.463	32.8667	77.8808	192.139	68.975
2.91_421.7074m/z	421.707	2.9102	0	0	0	0	0	0	0	0	0	0.340942	0	0	0	0	0.421692	0.246649	0	0	0	0	0	40.3269	40.1104	36.4449	36.1985	34.4686	45.2036	32.0602	30.472	28.7487	29.4451	33.0821	17.947	21.2437	18.8095	15.6374	18.1167	18.7031	11.4534	18.3147	20.8576	16.824	124.165	13.599	12.3409	88.0496	12.7604
0.88_1159.1434m/z	1159.14	0.8754	0.681814	0	0	0	0.558472	0	0.0244032	1.02759	0	1.39758	0	0	0.282959	0	0	0	0	0	0	0.856323	0	266.523	224.525	242.785	244.63	224.867	189.143	156.343	165.677	144.672	139.885	168.128	80.0756	112.871	127.207	106.595	87.838	103.893	110.667	119.575	111.349	111.591	274.467	35.9353	227.175	327.238	160.434
3.76_684.5111m/z	684.511	3.7594	0	0	0	0	0.657959	0.160126	0.549316	0.635223	0	0	0	1.60998	0	0.659467	0.492096	0.904083	0	0	0	0.139464	0	212.472	241.994	242.062	217.941	248.096	228.688	234.11	157.816	206.984	179.504	201.94	180.025	178.719	139.903	66.4633	148.799	110.255	142.228	180.078	161.192	134.462	601.985	135.371	46.287	163.183	67.0732
2.83_653.1031m/z	653.103	2.83115	0.00395259	0.279455	0.731598	0	0	0	0.877647	0	0	0	0.206291	0	1.1001	0.0137314	0	0.156372	0	0	0	0	0	169.588	133.854	158.569	161.65	158.618	145.368	159.068	121.504	155.98	88.5714	106.54	57.9196	78.017	67.2767	76.6184	63.8544	59.458	56.0262	70.8556	74.9225	70.41	455.364	48.9243	71.4702	225.907	115.351
0.86_818.7716m/z	818.772	0.859183	0	2.40134	1.06025	0	0.888367	1.38885	0.805969	0.951569	0.326202	0.575378	0.649324	0	0	1.16364	0	0.912567	0	0	0.282043	0	0	561.105	568.414	581.45	540.775	525.804	379.084	445.595	392.953	394.453	349.57	371.508	208.384	254.448	282.184	290.407	210.026	223.118	252.975	253.387	227.817	272.49	594.552	70.2201	441.881	642.539	317.046
1.00_999.3458m/z	999.346	1.00308	0	0.801727	0	1.07739	0	0.470032	0.692632	0.414063	0.168723	0	0	0	0.74634	0	0	1.45892	0	0.336521	0	1.55093	0	327.423	330.634	339.169	328.194	328.535	262.391	259.127	267.883	253.444	227.258	229.394	144.717	115.252	129.386	133.83	97.9146	115.049	127	102.185	95.4373	111.042	308.664	229.432	436.346	352.137	150.381
2.57_642.7955m/z	642.796	2.57377	0.13149	1.37012	0.642432	0	0	1.16575	0	0	0	0	0	0	0	0.699912	0	0.630589	0	0	0.0752872	0.817376	0	261.742	255.764	240.491	233.449	241.447	219.958	215.375	214.67	219.731	185.413	197.724	133.167	120.562	109.542	105.899	123.252	117.833	118.794	115.288	114.337	103.394	750.578	77.5086	83.1408	188.405	176.867
0.92_533.0209m/z	533.021	0.922017	0	0	0	0	0	0	0	0	0	0	0	0	0	0.00893669	0.363586	0	0	0	0	0	0	18.5887	15.4182	19.1134	21.2428	15.8803	14.1726	8.35446	19.4501	8.50807	5.05839	12.1146	10.5601	19.4076	10.705	12.5162	5.9215	10.2855	9.60949	6.51055	6.59397	6.49966	29.3196	4.03994	16.2334	43.7622	9.22084
0.86_1132.6581m/z	1132.66	0.864583	0.971313	0	0	0	0.817371	0.335848	2.03827	0.970825	0	2.33984	0.76593	0	0	0.750305	0	0	0.630744	0	0	0	0	493.549	409.257	428.958	383.617	415.638	285.344	345.735	289.627	307.524	269.39	269.804	158.024	175.856	202.155	226.847	175.448	170.825	192.523	217.423	174.242	206.928	488.199	43.2366	445.851	489.03	312.605
2.88_589.7796m/z	589.78	2.87777	0	0.201294	0	0	1.23836	0.00250223	0	0.274308	0.33541	0.578644	0	0	0	0.350464	0	0	0.49597	0	1.62089	0	0	236.832	249.852	227.77	225.573	214.397	193.476	192.897	200.232	172.967	162.55	145.097	99.2288	114.305	103.625	104.014	104.825	102.16	91.1216	115.846	120.717	98.1797	661.768	53.0613	125.542	349	94.1234
6.59_151.9507m/z	151.951	6.5861	61.4104	59.7703	53.4712	46.6834	46.9451	50.7473	72.7162	87.2563	112.539	49.9027	52.5866	59.7052	57.9903	45.3898	60.8712	54.8617	40.8577	61.1173	46.6707	46.6605	27.365	41.475	44.6413	43.2644	49.9947	44.0011	32.4686	35.5739	37.8137	48.1056	66.8	100.657	37.5159	32.8674	36.7512	37.5674	39.606	34.0493	31.9135	30.5356	30.6684	26.643	40.2282	56.5961	48.2161	36.682	49.6566
3.18_550.7634m/z	550.763	3.17838	0.0751096	0	0	0	0	0	0	0.113602	0.420807	0.0264442	0.501186	0	0	0	0	0	0	0	0	0	0	57.2593	51.7364	47.8914	49.0662	40.1405	38.6105	32.1491	32.7907	30.8509	21.7285	37.1833	21.8088	12.1303	19.2747	24.7926	18.2823	18.7463	17.0974	18.7288	23.6238	14.3218	104.538	2.518	10.4284	88.9374	11.0834
0.82_610.1540m/z	610.154	0.82135	0	1.18032	0	0.04049	0	0	0	0	0	0	0	0	0	0	0	0	0	0	0	0	0	63.8365	56.6493	58.4458	58.4946	52.9386	74.1256	47.0878	44.4128	52.1806	37.9973	45.6985	27.0546	23.9842	18.3138	16.7477	23.7056	23.6814	14.9788	18.9186	11.3963	21.2198	130.341	13.4816	44.3339	91.7942	22.8434
7.48_195.1745m/z	195.175	7.48397	70.2253	77.8905	29.2165	33.7842	28.9129	24.5173	18.2369	16.0038	27.4447	26.4013	20.3138	20.4439	16.2408	17.7597	19.3376	17.7528	16.3558	19.35	14.5878	17.5219	16.2769	21.5782	19.6142	17.1351	17.9366	28.022	23.6062	26.4796	21.4127	19.7917	19.4138	23.6094	18.1365	19.4073	18.36	15.7464	14.4007	17.5779	13.8531	15.1152	16.579	15.6253	14.6506	17.3373	29.3035	28.3144	32.8849
7.80_192.9791m/z	192.979	7.79878	57.9509	54.6868	48.2017	7.10601	12.0441	13.3235	8.36556	12.3669	13.4708	9.91693	11.1663	15.9697	11.8367	6.20976	8.66191	9.24932	9.12086	12.9074	13.5215	12.88	8.37995	43.3628	16.3177	7.80214	7.47591	5.50273	4.26088	10.7771	12.9708	15.1421	18.8427	18.7169	12.5622	8.59703	13.7717	12.2026	7.08193	9.78126	8.36084	11.3702	9.95497	11.433	7.93092	10.5044	7.07104	10.5782	3.423
0.92_229.0607m/z	229.061	0.922017	0.65929	0.793484	0.965924	0.190347	1.06311	0.250749	0.495456	0.0447212	0.441333	0.124997	0.359826	0.278065	0.232346	0	0	0.078845	0.00561467	0.0111548	0	0.170934	0.0151698	193.978	194.73	221.432	224.396	250.398	207.392	125.946	121.071	163.224	160.174	149.232	155.461	147.237	121.845	145.105	82.4386	134.816	103.34	98.7268	129.806	153.296	343.274	119.296	214.053	298.99	197.204
5.37_421.1554m/z	421.155	5.36805	0.288281	0.0157235	0	0.637024	0	0	0	0	0	0	0	0	0	0	0.372345	0	0	0.0287591	0	0	0.610107	77.7946	72.548	72.1648	64.4115	65.4135	55.8019	51.231	47.8925	47.823	45.5037	64.8656	56.9111	62.6659	62.8544	54.6488	47.2015	50.4022	31.7313	44.7484	47.355	49.3773	144.729	21.3562	67.8122	83.2795	61.9577
3.77_684.6767m/z	684.677	3.77022	1.08799	0	0.203985	0	0	0.411377	0	0	0	0	0.742889	0	0	0	0	0.388903	0	0	0	0.365505	0.0222858	171.774	158.915	156.539	129.356	166.027	121.165	122.213	115.92	130.83	83.3604	93.8988	93.8705	98.146	77.7291	6.40083	76.8352	77.0979	104.532	75.3183	78.8353	64.9919	372.827	63.9316	36.0783	94.7533	23.5559
6.56_168.9842m/z	168.984	6.56448	11.711	10.1328	12.6185	10.3899	7.23306	8.74548	8.53306	8.0419	11.03	12.7815	17.7298	21.7586	20.6471	11.631	19.2225	29.1	20.5828	20.6258	13.8888	6.93505	6.03803	5.48888	9.32585	6.05826	10.0281	7.50872	6.98265	9.14243	6.31353	3.76658	5.31405	14.1418	14.0835	14.8758	10.22	25.4347	11.076	11.3447	8.04111	9.34902	13.1619	4.82711	14.1905	10.3232	9.87474	8.33976	8.28695
3.26_552.6038m/z	552.604	3.26285	0	0	0	0.490029	0.411163	0	0	0	0	0	0	0	0	0	0	0	0	0	0	0	0	36.9356	33.6349	22.4121	30.8062	26.5463	31.7873	27.9668	29.9908	28.4063	23.8434	19.4792	26.1418	18.2758	14.2401	18.8316	15.4247	13.1545	15.6066	10.9396	15.941	12.8163	70.8013	20.6686	4.42679	85.996	6.23506
7.17_305.0703m/z	305.07	7.17453	16.3825	12.7044	13.0056	14.9864	16.7617	5.16147	8.90615	11.0872	9.28902	12.5992	14.5067	4.49662	4.08399	11.1072	5.4032	3.67884	5.75169	5.95012	6.41909	3.49123	2.80239	13.0511	10.7576	12.5063	9.76515	13.0289	13.5024	10.8714	3.97791	9.18506	9.50992	4.57672	4.82391	4.50175	5.88563	4.05669	3.86924	2.77361	4.59474	4.13932	2.69629	2.60064	15.6254	10.678	16.9497	14.2632	11.2862
7.77_195.1739m/z	195.174	7.77378	122.462	146.579	101.312	37.4168	42.5652	30.2424	26.1506	21.0024	29.2296	31.7586	28.6603	27.1146	21.0686	18.5427	20.4519	19.9102	14.204	20.0727	19.4045	15.8417	23.0928	86.3663	43.7509	23.55	30.8401	29.8643	31.3867	37.6611	30.5502	31.6675	25.3456	36.0751	17.8758	25.802	21.9568	21.3818	16.8978	31.5499	17.3801	23.6263	20.3762	20.4141	32.9574	32.1656	44.0241	67.5209	39.1982
0.84_699.0931m/z	699.093	0.842967	0	0	0	0	0	0	0	0.706218	0	0	0	0	0	0	0	0	0	0	0	0	0	47.3085	49.9448	33.534	39.7223	36.5682	34.1495	27.4479	27.1016	31.5987	16.7154	27.8787	15.5011	7.48169	9.15684	7.04029	8.35367	7.43354	13.776	5.89123	5.07696	11.0559	63.9245	12.4065	46.542	60.1023	25.6753
0.93_170.9726m/z	170.973	0.927433	5.48056	12.7835	7.60959	7.13858	6.02435	4.4986	7.89708	8.47329	6.31467	3.8546	5.61453	3.82241	2.81021	4.04631	5.23857	4.28063	7.23873	4.8697	4.999	2.78484	4.68814	5.58949	3.82599	8.10239	3.86772	9.3927	7.97733	2.99359	3.78949	3.44956	4.21963	3.20574	3.41238	2.97052	7.2052	4.46653	2.37762	2.07493	4.40501	4.81042	2.07614	2.71974	3.38349	0.082989	10.0877	3.21614	0.914007
2.80_512.7340m/z	512.734	2.79872	0.69399	0	0.435046	0.505188	0.0169169	0	0	0.379745	0.668835	0.475342	0	0.364981	0	0	0	0	0	0.391693	0	0	0.585335	196.485	171.911	165.91	199.234	186.745	158.983	167.582	140.404	147.264	128.625	138.405	92.1013	104.956	80.494	87.8433	86.3771	70.7159	83.5392	85.5749	98.4487	59.1205	522.797	48.2277	110.422	297.397	138.446
6.04_70.0133m/z	70.0133	6.03552	10.9466	11.2177	12.632	11.4474	10.4127	11.2548	12.073	10.4538	12.1973	11.6367	9.14079	12.1305	12.0662	12.2433	8.36614	12.9134	10.9242	5.94778	10.1215	10.3595	9.32118	10.0454	10.5367	8.35028	9.59021	9.25205	7.61866	9.63648	8.49634	8.37914	7.80664	8.23222	10.7999	6.49042	6.36858	8.1308	7.11422	8.38688	5.98283	6.21841	7.14744	7.50557	8.2251	8.06537	10.9179	8.63195	10.4821
1.24_466.7101m/z	466.71	1.24425	0.517969	0	0.0190534	0	0	0	0	0	0	0	0	0	0	0	0	0	0	0	0	0	0	23.9078	26.9067	25.1284	29.1239	26.2181	21.4421	15.0295	19.3499	21.0441	9.2653	13.3121	10.3265	7.11729	6.47067	6.55711	11.8801	7.71015	4.82517	6.65208	5.43866	10.0434	75.4142	7.03145	11.5061	52.4113	15.9981
4.68_306.1377m/z	306.138	4.68438	0	0	0	0.601303	0.372467	0.0201759	1.49205	0.322578	0	0.0205416	0	0	0	0.118485	0.488741	0	0	0.462616	0	0	0	131.066	146.536	148.698	146.404	136.335	133.023	120.331	126.477	119.847	112.159	111.166	109.451	118.03	112.2	99.0199	108.724	85.9897	84.1526	84.9304	107.268	84.0623	429.256	39.092	82.8482	187.402	99.0238
0.93_1091.1315m/z	1091.13	0.932833	0	0	0.446072	0	0	0	0	0	0	0	0	0	0	0	0	0	0	0	0	0	0	29.17	26.7971	19.9975	23.8211	33.7942	26.4624	14.2864	11.5506	9.80453	11.6603	12.9846	8.80552	13.3485	3.37638	8.85268	4.14587	4.71002	11.7505	7.76046	11.1414	8.00205	27.3627	7.53556	16.1306	47.6748	4.74837
0.81_263.0839m/z	263.084	0.81055	0	0	2.41768	0	0.260291	0.231685	0	0	0	0.545869	0	0	0	0	0	0	0	0.307374	0	0	0	151.48	157.6	156.779	133.418	143.964	137.694	147.19	115.661	123.423	110.733	119.438	79.3832	71.0081	71.2781	85.6136	79.6361	78.8452	75.5554	69.5584	66.9606	67.089	333.64	61.0936	99.0857	153.833	87.4344
0.95_747.2722m/z	747.272	0.95445	0.571582	0.430588	0.275146	0	1.58192	0.925537	3.2548	0.301335	0.737407	1.16876	0.752753	0.304596	0	0	0.536111	0.825378	1.41113	0	0.364868	0.902496	0	680.391	620.636	615.65	606.691	591.851	568.739	564.476	510.023	493.494	450.393	463.558	324.623	192.918	272.818	280.698	261.109	246.381	240.024	246.714	231.973	269.013	634.365	364.036	502.819	769.039	437.494
1.00_240.0929m/z	240.093	1.00308	0	0	0	0.176748	0	0	0.202098	0.00493283	0.935707	0	0	0	0.00619128	0	0	0.270965	0	0	0	0	0	60.611	55.7464	56.7382	57.1678	58.4369	54.5072	54.1397	49.1494	46.5057	47.3434	46.2564	36.1627	23.2461	25.7353	29.2996	29.2126	32.944	28.1773	25.6176	24.1129	25.0923	81.4898	35.4218	42.5053	84.2841	41.5727
0.87_1164.6459m/z	1164.65	0.87	0.037304	0.802875	0.531156	4.96953	0.770142	3.24855	1.21124	2.70996	1.30554	0	0	0	0.880737	0.691997	1.93463	2.40717	1.1665	0	0	1.5946	0	1196.29	1144.21	1083.46	986.901	1048.9	744.991	855.259	734.703	775.247	619.236	712.376	467.43	435.267	587.185	528.024	453.555	483.523	502.183	496.549	442.343	577.178	1222.42	91.3789	1126.61	1238	740.153
3.76_621.8033m/z	621.803	3.7648	2.1423	1.62959	1.86859	0.817108	0.586072	0.00697313	1.13315	0.381409	0.479163	0.724426	0	0.464325	1.661	0.0120543	1.2749	0	0	0	0.740875	0.600189	0.239838	384.378	395.834	376.898	399.257	419.574	371.718	355.605	317.52	329.267	305.235	269.416	265.775	291.938	259.991	245.382	255.524	231.01	211.734	229.018	262.638	225.738	605.243	195.48	316.976	572.902	377.835
5.78_287.2005m/z	287.201	5.78015	6.37983	3.72853	1.82093	3.12174	5.6685	5.52207	4.55516	4.41827	6.78118	5.82026	4.37829	5.23204	6.33684	3.86332	5.41745	4.63453	4.59514	4.84439	0.450881	2.09243	0.823208	2771.84	2781.87	2773.71	2735.68	2710.76	2327.03	2296.77	2165.04	2292.09	2216.01	2360.46	2210.68	2393.09	2377.71	2139.5	2025.17	2047.35	2019.36	2164.41	2112.83	2166.03	2174.37	459.134	1174.34	5222.57	2845.45
0.99_144.1027m/z	144.103	0.992283	3.24984	3.89534	3.51851	2.22289	4.47702	2.51299	3.06498	3.04977	2.62687	1.69366	2.27279	3.31762	3.50198	0.768706	4.14793	3.6544	2.87046	2.01104	1.75961	1.32175	0.305101	2021.02	1992.35	2026.11	2021.24	2064.61	1981.98	1957	1785.96	1823.13	1677.38	1674.7	1371.39	1065.34	1029.48	1085.31	1054.24	1053.11	1045.05	1055.74	1020.43	1025.31	5749.37	795.81	1223.78	9645.05	319.679
6.88_111.1178m/z	111.118	6.87592	38.4212	31.1812	35.2892	30.9882	27.4827	31.1235	36.9293	33.914	38.9945	38.0184	23.1185	27.6284	26.4949	26.3038	21.9669	25.264	24.3344	22.3462	17.9862	18.8236	18.8018	34.5803	32.271	30.6731	34.6301	33.0675	24.8489	30.7149	23.641	27.3153	26.7583	28.462	62.5521	59.7302	49.0884	53.0759	43.787	39.1642	39.4916	40.6699	48.2314	45.577	13.6618	10.1041	9.18967	13.7773	11.0364
1.04_357.0997m/z	357.1	1.0355	0	0.834793	0	0.380005	0.384171	0	0	0	0	0	0	0	0	0	0.669281	0.462326	0	0	0	0	0	128.445	122.366	116.352	114.997	125.896	86.0009	91.9171	72.5046	71.2552	73.2446	78.1023	54.8601	46.6938	41.4153	57.6859	41.9617	47.7244	41.3809	55.7298	36.8583	50.5996	165.658	44.3765	100.845	150.307	145.606
2.74_576.9887m/z	576.989	2.73927	0	0	0	0	0	0	0.405577	0	0	0	0	0	0	0	0	0	0	0	0	0	0	15.9233	16.0316	23.0984	22.9489	20.5614	23.4577	13.8163	12.472	8.16367	14.9554	11.7346	3.64981	1.98661	6.90844	4.71799	7.63418	3.26257	5.40209	6.29493	7.91618	7.99612	65.5462	1.80615	8.18391	13.4678	17.2732
4.30_376.0448m/z	376.045	4.30472	0	0	0	0.415787	0	0.0103218	0	0	0	0	0	0	0	0	0	0	0	0	0	0	0	20.1499	12.434	18.146	21.7701	14.2291	17.548	13.601	11.1074	11.7592	11.0148	11.7344	14.0911	9.95604	11.4804	8.2927	12.2003	6.85013	7.0876	5.56638	6.31436	8.66867	24.2393	4.26508	16.4161	18.5664	16.309
4.28_304.2114m/z	304.211	4.2831	0.633186	0.0181783	0.603349	0.0283963	0.581816	1.11746	0.639263	0.445977	0.906412	0.26291	0.248934	0.139529	0.0949953	1.05489	0.48126	0.877996	0.516326	0.00737374	0.347956	0.224859	0.0679551	335.558	319.326	309.357	326.151	303.254	304.38	260.938	262.876	266.598	214.829	245.64	248.902	257.518	261.869	227.772	233.973	222.556	208.252	228.648	247.078	217.013	687.652	95.9992	196.997	806.757	265.927
1.17_181.0375m/z	181.037	1.174	0	0.279875	0.00379294	0.153448	0	0	0.760162	0	0	0.0275467	0.236123	0	0.0579421	0	0	0	0	0	0.0142283	0.135662	0	49.6613	58.4554	65.2688	49.323	52.8714	43.2595	40.0071	43.4385	40.5592	33.3461	39.5105	32.3998	29.5376	24.6016	32.8316	22.8869	27.9795	23.3957	22.0186	19.1397	26.6956	72.0548	26.8134	50.0744	61.5127	34.5502
7.38_238.9676m/z	238.968	7.3833	136.65	111.627	96.3711	110.258	113.354	36.2621	63.7126	75.9301	47.1731	91.4983	118.396	24.3551	54.5323	73.3511	86.2708	22.9165	35.1104	53.9253	49.5297	16.1187	28.1704	93.353	91.4065	93.2635	92.8436	97.9079	95.6261	94.0882	31.5122	54.2289	67.3909	38.6869	39.9633	68.6787	68.0976	13.3537	22.3779	37.6249	47.2446	9.15132	11.6428	11.5794	86.39	79.8635	100.749	88.9702	88.8919
2.91_484.7282m/z	484.728	2.9102	0	0.243921	0	0	0	0.0416515	0	0.213932	0	0	0	0	0	0	0.259619	0.605865	0	0.00469086	0	0.437714	0	81.6377	96.0957	74.912	78.3947	71.6168	61.0651	69.7414	72.9518	56.8712	47.8377	62.3239	38.4632	48.8514	35.3445	39.7317	35.8701	38.102	29.0894	28.1758	36.0411	29.1296	224.993	26.9267	54.6684	134.647	50.6482
7.99_201.1605m/z	201.161	7.98592	399.633	485.473	421.678	270.125	232.056	121.488	73.826	96.9054	110.759	81.1622	84.3671	89.3082	52.9223	83.4279	94.608	60.7405	62.8129	77.1799	63.2049	95.7768	63.8076	357.321	181.621	129.481	133.504	116.16	176.723	141.54	161.772	98.7298	136.34	117.8	73.2355	85.7837	80.2485	67.2422	40.7943	147.899	66.664	66.1765	54.8678	57.7658	150.671	172.577	271.225	316.488	178.19
0.83_316.9924m/z	316.992	0.826767	0	0	0	0.31133	0	0	0	0	0	0	0	0	0	0	0	0	0	0	0	0	0	11.3761	12.9246	18.2617	11.562	9.60422	12.5957	13.3737	9.20951	7.71298	6.45622	6.08657	3.4286	9.06703	1.95288	8.57012	4.26338	5.79371	4.726	6.00769	7.83974	4.79995	16.142	4.65446	5.05244	13.3843	10.0076
6.65_331.0032m/z	331.003	6.64555	14.9681	6.5074	10.9702	6.06034	6.1299	7.45571	11.1863	7.22229	9.38667	7.52561	6.20953	8.32754	5.46176	5.41803	7.21341	3.7236	4.36852	6.02418	3.01633	3.37561	2.67818	9.87296	4.87154	5.62052	9.857	5.81471	5.15179	6.55084	3.86375	2.75087	4.42174	4.73914	9.27528	6.6928	5.18869	4.63502	5.57572	1.46262	3.69743	4.20163	3.92761	2.52775	6.84679	6.40053	9.69664	6.0402	10.1521
5.78_505.1692m/z	505.169	5.78015	0.508202	0.583679	1.57954	0.812516	0.900089	0.131538	0.78246	0	0	0.4661	0.363586	0.659206	0	0.916296	0.579773	0.530106	0.624969	0	0.526957	0	0	325.804	336.438	338.393	334.131	295.839	250.353	245.314	224.065	240.902	209.48	240.089	240.82	242.645	252.32	211.21	180.809	204.496	198.137	208.512	217.301	230.853	137.706	77.172	102.916	480.727	261.808
6.96_318.9226m/z	318.923	6.96037	9.5766	6.16008	7.02869	9.76954	6.18514	5.03279	5.49896	9.09973	4.63134	7.48193	7.56941	7.02273	8.86637	2.56865	8.77813	4.44219	6.2697	4.92585	5.17282	6.04432	3.62236	5.44832	8.58355	3.1808	6.81128	3.57024	5.54212	4.23118	5.11083	6.67665	3.95268	7.86607	6.12245	4.98843	4.23495	6.78391	3.63206	1.3186	6.28701	4.94218	2.32684	3.1494	2.81425	4.32698	8.02778	3.64966	3.9037
6.04_79.0187m/z	79.0187	6.03552	3.32393	3.74168	2.94498	3.76141	3.54063	4.76419	5.02416	4.56435	4.17222	2.84263	4.37476	4.64081	2.66583	4.55439	2.91032	2.51231	5.37501	1.03829	2.77525	2.38286	2.76719	2.45025	2.04674	3.29745	1.97153	2.56574	3.23538	2.31343	3.07149	1.73347	3.24545	2.95358	3.06062	2.68386	3.7749	3.40032	1.02262	2.86874	2.54256	2.37143	2.17924	3.16303	1.9208	2.31759	4.09349	3.55695	1.40036
6.04_599.2244m/z	599.224	6.03552	0	0	0	0	0	0	0.115401	0	0	0	0	0	0	0	0	0	0	0	0	0	0	0.25708	0.867287	2.58875	3.44837	5.3743	3.35658	4.45818	4.33157	2.56924	3.28589	0.734711	0.961544	1.05507	2.3619	1.41916	1.64404	2.05508	2.78099	2.24388	4.40387	3.11614	1.81149	1.89878	1.44867	4.99458	1.96394
0.87_756.7530m/z	756.753	0.87	1.12012	1.50302	1.63541	1.3141	0	0	0.577148	0	0.721436	1.42605	0	0	0.927246	0	0.373688	0	0	0	0	1.67337	0	542.74	528.422	588.026	525.609	546.436	372.046	435.04	398.282	406.36	363.331	376.414	214.055	234.433	276.83	239.718	212.583	237.271	229.224	243.768	196.714	276.974	572.866	67.3353	388.171	570.031	312.774
6.67_111.0128m/z	111.013	6.66717	108.493	111.449	116.561	78.7405	84.0888	71.7444	81.1062	93.9104	95.8594	98.4043	82.1309	101.448	117.984	77.944	99.7732	108.407	79.7852	80.7069	90.5846	77.4778	76.9491	80.3217	80.0901	80.3892	83.2263	94.1144	63.4416	70.2819	54.2412	61.2182	64.2456	86.1851	82.2658	78.0461	72.8252	80.5186	68.2112	51.4555	54.2581	62.872	58.5873	62.1774	58.9281	97.0304	100.438	64.2844	86.4684
4.41_509.5844m/z	509.584	4.40738	0	0	0	0	0	0	0	0	0	1.01198	0	0	0	0	0.967361	0	0	0	0	0	0	88.01	76.2375	70.1411	63.1965	70.4263	49.6262	61.2395	36.8904	63.2992	49.8362	47.7595	50.9589	65.6746	48.5981	52.4567	48.1876	44.6506	32.2245	46.1227	52.459	54.5504	186.175	12.6458	54.0435	127.376	36.0803
0.86_678.7256m/z	678.726	0.864583	0	0	0	0	0	0.444883	0	0	0.330597	0	0	0.443072	0.122896	0	0	0	0	0	0	0	0	44.5631	50.9131	63.5602	53.8889	47.5017	30.4529	29.9563	24.6376	36.1576	34.8748	34.0136	16.2619	21.8598	14.5168	21.7003	11.4635	22.6278	20.3825	25.5102	15.8111	23.4827	44.774	2.73486	74.2727	63.8572	70.855
7.17_292.0410m/z	292.041	7.17453	58.9984	46.6132	41.1554	46.1288	57.3398	8.83144	31.9064	43.4131	14.7733	35.599	60.7307	6.39458	2.32493	16.0146	25.6714	3.62773	3.96704	6.14324	16.3459	3.85204	1.92089	45.4924	48.167	47.2743	44.3525	47.7931	52.7661	42.974	3.29921	32.0081	38.0298	6.06242	5.31572	13.6266	17.1915	1.30337	2.35374	1.91529	10.1811	2.3902	1.30008	2.65744	60.8062	49.6138	59.4807	50.6546	49.9902
0.86_630.7938m/z	630.794	0.859183	0.357056	1.70828	0.537903	0	0	0	0.810621	0	0	0	0	0	0	0	0	0	0	0	0	0	0	162.948	152.077	146.577	148.86	134.624	102.23	132.079	108.611	103.955	101.863	94.1813	49.3495	62.9393	69.882	56.9799	52.2966	50.3537	54.4602	57.7076	52.0121	58.4798	147.395	25.5278	202.218	136.685	80.5183
3.14_742.0046m/z	742.005	3.13515	1.57677	0.422351	0.297546	1.43719	4.72842	0.624487	0	0.387604	0	0	0	0.528335	1.42174	0.13092	0	0.916517	0.243988	0	0.325087	1.04843	0.149352	561.079	540.563	540.76	519.934	512.816	457.073	455.707	423.56	448.503	403.038	393.261	306.965	315.481	291.215	296.522	282.919	259.936	262.1	285.801	322.915	277.798	1558.84	162.566	358.758	908.053	323.074
4.70_611.0340m/z	611.034	4.7006	3.40134	0.423585	0.240147	0	0	0	0	0.119601	0	0.180147	0.552717	0	0	0	0	0.565621	0	0	0.210794	0.356506	0	218.894	219.856	219.849	223.556	220.508	193.477	187.956	170.673	185.931	181.094	181.593	154.8	178.065	173.328	188.552	158.131	150.224	134.64	138.392	171.591	133.331	446.895	20.8678	27.4091	284.826	19.3231
0.86_614.8125m/z	614.813	0.859183	0	0	0	0.26001	0	0	0	0	0	0.351612	0	0	0	0	1.16061	0	0	0	0.74295	0	0	111.984	108.849	97.6136	94.9298	108.312	66.0951	88.5735	63.3135	75.5783	61.3859	61.2785	36.8737	36.2841	38.627	50.0067	31.1985	31.4927	45.8458	29.273	30.6491	38.2934	80.6022	14.9215	117.222	88.0552	54.5693
0.87_747.8240m/z	747.824	0.87	0	0	0	0	0.62149	0.394775	0	0	0	0	0	0	0.866974	0	0	0	0	0	0	0	0	99.7502	94.6876	103.6	79.2742	69.7325	69.325	84.5524	47.4795	53.4532	51.3762	54.9964	27.4165	33.2735	31.2807	40.4955	39.1542	51.6578	40.8242	41.2846	53.7575	45.6193	102.457	13	58.5084	82.9424	43.5954
5.04_342.2269m/z	342.227	5.04243	1.71586	1.31618	0.767684	1.80162	1.30149	1.64621	2.66951	1.02565	1.89604	1.01542	1.18942	0.485702	1.16296	0	1.18801	0	1.10471	0.291397	0.34318	0	0.76001	651.87	676.613	683.297	684.302	657.007	587.553	579.166	571.693	581.757	515.107	590.397	557.336	554.417	548.174	513.51	506.832	466.249	477.102	513.219	528.641	489.565	2136.82	169.252	293.341	1295.14	513.75
3.21_435.4980m/z	435.498	3.21422	0.539289	0.401918	0	0	0	0	0	0	0	0	0	0	0	0	0	0	0	0	0	0	0	46.208	44.0236	53.5237	53.7698	43.1615	34.9848	35.1265	36.8908	30.4705	25.4737	25.0143	17.9341	19.2157	28.8915	16.3413	21.3721	14.2977	12.8053	14.5519	16.706	14.9207	136.925	18.4768	17.6956	98.5151	23.9833
3.95_579.7751m/z	579.775	3.94663	1.30765	0.668183	1.21087	0.915613	0.81601	1.84149	1.29722	0.922376	0	0.103166	0.157867	0	0	0.105758	0	0.00121748	0	0	0.794026	0.641907	0.340466	391.313	398.886	363.853	373.634	390.691	337.019	338.057	322.007	339.416	307.138	294.772	281.157	288.622	277.292	274.49	244.489	251.598	264.259	258.411	297.389	238.847	957.173	162.575	232.626	717.556	216.192
2.71_737.0829m/z	737.083	2.70685	0	0	0	0.261322	0.101316	0	0	0	1.68542	0	0	0	0	0	0.176871	0	1.03683	0.469719	0.296295	1.03363	0	217.472	217.904	187.825	204.284	205.738	181.31	164.1	179.021	161.091	148.776	162.046	118.15	106.723	99.1373	95.5492	98.3878	83.0492	74.139	105.73	102.763	98.2961	619.667	71.3659	116.178	323.663	144.969
5.82_528.2631m/z	528.263	5.81798	2.36664	3.25288	0.873627	1.18674	1.68683	2.53999	0.0531926	1.33282	0.921008	0.723114	2.0062	1.99355	0.442017	0	2.10296	2.85397	0.699359	0.890248	0.542511	2.01289	0.904236	1014.44	1041.34	993.918	1050.31	977.452	813.698	795.067	726.271	802.073	728.514	798.944	669.486	794.452	755.124	706.798	649.498	686.409	643.576	731.118	695.097	650.846	1239.95	380.248	585	1113.79	1039.9
4.88_305.2109m/z	305.211	4.87692	1.28975	5.73193	2.0575	3.07191	0	1.73657	1.37344	2.08178	2.54182	5.33111	0.509038	1.26215	3.54592	0.705673	2.10012	0.800266	1.69433	1.18673	0.47578	0.220044	0.545731	1243.51	1260.91	1265.03	1260.02	1263.34	1159.41	1083.91	1089.83	1078.13	967.105	1045.86	966.121	1012.95	1003.47	936.267	860.766	868.142	808.547	888.915	969.743	894.724	1629.24	352.104	1129.56	1642.26	1621.02
1.04_934.3554m/z	934.355	1.0355	0.701752	0	0	0	0	0.681702	0	0.200798	0	0	0	0	0.867493	0	0	0	0	0	0	0	0.56134	167.899	146.778	171.248	173.724	161.509	138.135	135.481	106.263	114.477	97.2852	92.3147	70.4178	54.1697	65.6251	52.2211	52.0773	47.5396	46.72	44.1662	46.6111	52.2023	393.321	50.2402	119.229	328.447	96.4574
0.89_364.9073m/z	364.907	0.8862	0.593582	0	0.00418787	0.267175	0	0	0.321304	0	0.0212467	0.0951167	0	0.100189	0	0	0	0	0	0.416539	0	0	0	47.2187	46.5515	52.627	43.5835	46.0152	31.0023	39.0169	36.2258	33.1144	22.7462	22.7688	19.0366	19.0606	24.0286	18.7976	17.5151	24.0347	22.9295	29.3755	17.4793	27.0949	53.2793	16.0049	35.6887	71.5754	119.013
1.34_271.0806m/z	271.081	1.33952	0.654907	0	0.284195	0	0	0	0	5.9809e-05	0.460643	0.338501	0	0	0.711823	0	0.206876	0	0.0843254	0	0	0.161519	0	140.628	133.205	123.165	126.551	125.437	106.988	117.376	105.451	110.686	97.9308	98.5822	65.3316	52.1187	61.6858	58.0365	53.4374	49.0218	62.1441	65.7066	47.9445	58.0044	305.945	43.3546	124.886	197.653	85.1505
3.50_695.6367m/z	695.637	3.50402	0	0	0.0132088	0	0	0.622833	0	0	0.0197323	0.18457	0	0.831949	0	0	0	0.468971	0	0	0	0	0	55.9814	87.9567	68.406	69.4727	48.1462	43.4553	46.6686	51.0661	59.5812	31.5483	58.63	39.8418	25.0104	35.2615	34.2698	34.3885	24.3595	28.9104	27.023	34.1624	38.8023	69.6797	6.78252	123.867	217.538	18.1838
0.87_1000.6945m/z	1000.69	0.87	0.294602	1.45328	0	0.799179	0	0	0	0	0	0.982147	0	0	0.781555	0	0	0	0.207336	0	0	0.463959	1.02338	251.075	260.731	255.703	253.244	244.968	163.575	162.178	200.064	185.843	167.712	194.626	111.86	139.107	135.93	120.536	77.4323	97.5707	127.677	108.728	85.1293	139.744	257.751	18.4961	254.123	320.966	196.431
2.47_550.0014m/z	550.001	2.4731	0.461609	0	0	0	0	0	0	0	0	0	0	0	0	0	0	0	0.193288	0	0	0	0	34.093	25.3534	38.3363	38.7212	24.7386	20.0512	29.1816	34.8046	17.6484	30.5205	22.6474	21.1175	14.1661	8.98951	16.4544	6.23287	7.7551	12.5409	9.85826	11.6798	13.1614	144.292	12.6953	7.68315	42.5435	5.8985
2.69_585.2624m/z	585.262	2.69063	0.49801	1.9951	2.77744	0.168945	0.686859	1.38058	0	0	0.666443	0.544312	0.188789	0	0	0.85861	0.415311	0	0	0	0.73352	0	0	448.566	472.889	455.804	473.265	460.891	362.66	402.277	353.564	364.887	315.785	323.852	240.761	232.625	200.876	217.886	199.565	175.138	216.157	209.211	242.075	193.87	1255.78	96.1803	319.718	797.494	208.409
0.82_453.2160m/z	453.216	0.81595	0	0	0	0	0	0.261697	0	0.00245362	0.209427	0	0	0	0	0	0	0	0	0	0	0	0	16.5423	20.0413	18.1734	14.5038	16.1138	14.2896	16.4753	13.6273	15.9032	14.522	17.2855	10.4241	1.84296	5.44974	12.8117	7.82946	4.55731	3.86844	5.31163	5.49905	3.37987	48.5832	10.1102	7.6203	36.0951	20.1677
5.61_544.3096m/z	544.31	5.60923	6.19712	5.90966	2.39719	1.13672	2.17257	3.90098	1.56925	1.17462	2.56503	4.85461	3.84546	1.90295	1.64236	1.32159	5.46347	1.32425	1.26563	0.342974	1.9918	0	1.14395	1821.72	1829.68	1794.33	1839.92	1773.15	1458.56	1507.77	1408.87	1490.22	1421.85	1498.86	1361.95	1462.57	1379.79	1261.58	1206.35	1222.69	1177.26	1350.27	1264.3	1280.32	4278.99	276.375	1583.47	4064.42	2235.17
5.22_606.2574m/z	606.257	5.21875	8.39549	3.66429	5.49388	3.66493	3.83487	2.39406	2.4516	2.43608	3.41529	4.61524	4.24148	1.41468	2.31113	1.60341	2.13266	4.32259	1.81334	0.962125	0.855477	2.62257	1.1698	1999.79	2014.1	1955.57	1984.46	1967.42	1848.79	1757.93	1715.51	1767.39	1609.86	1760.55	1639.75	1608.02	1633.97	1496.13	1441.43	1421.59	1348.41	1451.45	1523.19	1433.27	7359.31	954.073	246.743	2561.87	1595.49
0.87_746.7364m/z	746.736	0.87	0	0	0.83667	0	0.615906	0	0	0	0	1.5661	0	0.735718	0	0	0	0.232666	0	0	0	0.502441	0	209.746	223.967	218.178	194.768	217.865	130.648	162.912	156.369	156.484	153.701	154.933	79.715	98.129	102.463	86.8153	73.7563	81.0041	93.1359	83.3704	72.1506	90.4584	218.577	19.4667	206.85	257.612	146.527
0.87_1006.7184m/z	1006.72	0.87	0.767815	1.17352	0	1.77942	0	0	0	1.02283	1.87634	1.02145	0	0	0.68692	1.76099	1.37415	0	0	0	0.659485	0.83197	0	563.487	562.276	542.901	489.034	520.058	345.041	384.381	397.938	406.026	338.777	386.688	236.723	248.729	281.145	220.887	192.539	237.799	232.846	216.304	230.907	254.104	599.379	72.642	503.062	628.672	373.724
2.83_655.0975m/z	655.098	2.82573	0	0	0	0	0.134803	0.243221	1.87859	0	0	0	0.705246	0	0	1.65921	0	0	0	0	0	0	0	214.708	207.703	214.006	204.424	181.849	157.582	176.116	166.457	150.59	119.675	127.303	77.2304	100.894	85.4413	101.946	82.4016	48.9152	64.6079	76.2919	98.4373	79.0857	560.729	90.8671	84.6432	267.172	88.6629
6.09_303.6330m/z	303.633	6.08957	0.440838	0	0	0.169911	0.370872	0	0	0	0	0.514984	0	0.213272	0	0	0.205994	0.338189	0.155099	0	0	0.236206	0.0658687	86.2417	79.8746	95.8546	88.1896	81.9526	83.8869	67.9944	74.3522	90.0221	65.474	81.9379	80.347	59.5386	64.9031	71.3596	53.9699	62.8751	54.3162	69.7903	62.2258	71.381	227.579	12.5294	71.828	154.907	97.1744
0.84_284.1323m/z	284.132	0.837567	0	0	0.441818	0.3172	0	0.231802	0	0	0	0	0	0	0	0	0	0	0	0	0	0	0	42.7788	41.8095	44.1098	39.9312	40.1677	34.252	40.6514	28.7535	30.0734	28.4365	24.5575	18.2818	16.3376	16.5405	18.5936	14.343	15.061	11.4619	12.3109	11.128	15.254	76.9787	32.1836	27.1475	53.3996	31.0555
6.97_434.8827m/z	434.883	6.97118	14.0236	9.50151	7.08344	10.1319	10.3093	11.4344	21.1202	15.504	19.6891	17.9461	14.4124	14.5102	15.657	10.0391	16.1548	12.6818	10.0741	13.4022	9.31249	10.7578	12.5772	7.39661	10.273	9.36061	11.2549	8.57734	9.45946	8.96015	10.8577	12.3028	13.1969	14.1463	12.3777	7.53432	10.5051	13.9074	8.48978	10.7162	6.59585	9.85854	7.24003	10.1266	13.6263	7.46994	9.70142	9.55597	13.4475
0.87_595.8564m/z	595.856	0.87	0	0	0	0	0	0	0	0	0	0	0	0.686855	0.571289	0	0	0.517273	0	0	0	0	0	92.0158	95.2681	78.9932	93.3983	95.4863	50.3521	56.1158	67.3318	68.7424	48.4983	59.9644	36.6998	40.5799	44.328	34.6709	25.1986	33.4965	34.7985	31.7252	34.9508	43.4745	88.0671	5.78458	51.2619	87.8376	48.9053
7.02_327.0792m/z	327.079	7.01983	25.3077	20.7469	19.367	22.27	19.8603	21.938	22.1727	17.7823	26.094	18.6624	21.2696	25.9786	22.1426	16.6314	16.7097	19.4496	16.995	13.3494	18.0395	12.5761	18.523	24.3776	21.6199	24.5352	23.1641	23.1446	15.6205	15.1312	12.6416	15.2548	16.2647	14.3802	14.0756	16.0471	21.0241	19.9753	12.4113	11.559	10.7483	7.44707	7.8185	11.0295	21.9316	15.161	21.2767	23.5821	19.9302
0.88_1045.6930m/z	1045.69	0.8808	0	0	0	0.324951	0.566406	0	0	0.467285	2.03839	0	1.28046	0.962891	0	0	0	1.03259	0	0	2.08154	0.790955	0	453.923	434.323	429.048	360.662	399.798	282.256	326.336	259.825	261.722	245.404	246.822	158.611	161.475	220.156	202.042	177.779	206.996	214.68	212.115	220.236	234.876	440.142	39.4847	397.131	484.107	269.877
0.90_961.0201m/z	961.02	0.897017	0	0	0.237122	0.630066	0	0	0	0	0	0	0	0	0	0	0	0.194708	0	0	0	0	0	46.3336	37.5797	48.7861	56.4874	52.2635	33.4612	34.7016	43.3806	34.0519	30.8415	28.6068	19.8338	26.068	29.15	24.8496	8.88759	20.2966	21.4384	24.3046	19.4842	25.4361	53.4522	8.59916	30.1024	50.058	16.5124
0.86_1141.1628m/z	1141.16	0.859183	0.324951	0.775452	0	0.73114	0.57605	0	0	1.4534	0	0	0	0.91748	0	0	0.0894563	1.27338	0	0	0	0	0	287.829	237.863	297.608	246.602	275.158	166.175	216.05	162.897	196.619	155.724	150.08	103.871	125.39	152.474	116.14	99.4655	119.694	129.365	105.336	108.903	132.247	324.007	41.9284	248.039	326.784	183.537
0.86_923.2101m/z	923.21	0.864583	0	0	0	0.165924	0	0	0	1.17032	0.644287	0	0	0	0	0	0	0	0	0	0	0	0	80.547	76.281	89.2917	71.1732	72.1503	55.7138	50.0802	60.7307	67.7406	71.534	62.0381	34.543	47.1302	38.2772	33.3893	29.3536	35.129	33.933	25.472	26.2813	35.8072	98.7812	12.6145	62.5073	97.7123	56.7339
1.12_188.0958m/z	188.096	1.11997	0.387252	0.318466	0.91127	1.57748	1.15739	0.281578	0.394165	1.73979	0.251477	0.504073	0.794443	0.639136	0.938178	0.480329	0	0.501018	0.199619	0	0.221059	0.131792	0.0916532	391.567	384.096	391.488	386.652	386.886	353.974	357.651	313.905	310.105	289.223	298.944	233.981	205.318	195.396	209.481	181.703	184.991	202.919	187.586	184.253	189.868	704.91	205.638	258.952	491.416	293.743
2.65_584.9333m/z	584.933	2.65482	0	0	0.0120512	0	0.0402543	2.45836	0	0.787127	0.0411243	0.243439	0.20255	0	0	0	0.733595	0.117609	0.528137	0	0	0.666412	0	258.895	252.961	218.432	244.727	272.9	205.985	192.102	172.081	185.625	164.331	181.581	122.081	112.305	119.568	108.195	99.6202	109.593	111.314	114.324	119.654	90.4606	683.919	66.6638	223.069	552.169	138.725
7.80_199.1739m/z	199.174	7.80418	204.766	265.65	184.41	86.9041	106.625	72.4472	58.144	47.7971	64.9444	65.2679	57.9064	53.6714	43.7202	41.3132	43.8881	40.6784	40.0219	43.7355	47.5421	45.9808	38.9165	181.237	94.5706	66.5721	63.6508	56.6574	77.9533	76.4957	66.0209	70.2553	54.3553	60.8498	45.8763	46.4833	45.4275	45.7996	39.6735	81.8554	36.2064	46.5821	42.3726	45.9303	77.2646	75.3001	96.0683	141.608	95.9973
2.55_646.0433m/z	646.043	2.55215	0	0	0	0.364046	0	0	0	0	1.06641	0.189683	0.925782	0	0	0	0	0	0	0	0.335559	0	0	127.256	116.03	123.405	111.584	117.58	95.7995	94.7988	91.4463	105.777	84.629	95.89	74.6813	45.682	68.4585	50.4936	55.8613	44.1529	50.7228	73.5285	52.5287	47.7693	396.578	48.7844	29.5868	98.8314	98.1965
3.46_720.3399m/z	720.34	3.45538	0.914436	0.117567	0	0.537057	0	1.15404	2.03615	0	0	0.643835	0	1.34253	0	0	0.55233	0	0.995695	0.469757	0.808594	0.416692	0	374.85	346.223	352.787	343.241	344.392	333.716	321.934	287.74	298.796	264.287	272.543	224.71	233.769	220.655	239.072	205.628	178.5	179.415	191.387	212.943	200.529	988.341	76.0154	228.72	616.665	230.616
0.87_884.7205m/z	884.721	0.87	2.16888	0.716003	2.66901	1.13623	0.955536	0.117004	0.872162	0.455778	1.97726	1.90469	2.40253	0.65094	0	0	2.07103	0	0.834991	0	0	1.23041	0	918.504	864.392	879.86	797.928	856.256	567.965	679.919	602.284	599.597	533.419	544.772	318.465	319.244	444.84	438.523	341.453	371.955	377.302	382.692	369.31	434.801	963.334	126.313	800.861	928.32	525.784
7.13_127.5229m/z	127.523	7.1259	6.07956	4.54573	8.35431	6.21976	5.95469	3.88898	4.26892	6.41435	8.73447	6.26594	9.57985	9.79354	10.2594	11.499	11.585	8.56957	8.39979	8.29628	6.87885	8.46127	7.9444	2.02048	7.57076	5.83538	4.20394	3.48357	6.53425	5.56046	5.02233	5.42015	4.31359	6.82493	9.46987	8.0068	8.05348	9.96807	4.98814	7.71145	7.09253	5.32292	3.93947	3.81197	3.98394	5.52291	5.5951	5.83026	5.37843
0.87_1103.1315m/z	1103.13	0.87	0.602844	2.39719	0.290527	0	0	0	0	2.75739	0.203369	0.841019	0	0	0	0	0	1.10345	1.00232	1.3017	0	0	0	530.977	518.532	468.352	432.966	471.929	374.282	324.059	309.08	337.383	284.163	290.994	181.985	186.916	225.009	233.494	210.575	201.494	214.608	227.045	173.486	259.379	516.041	48.6104	403.493	527.737	367.927
7.15_244.2256m/z	244.226	7.14752	52.1175	44.2922	41.9345	38.482	40.0225	41.4052	48.7432	38.4285	77.1395	45.8839	101.15	227.951	45.4956	31.1175	41.8076	36.642	48.9721	36.9582	35.0829	39.3362	28.4809	43.7259	38.7409	36.8876	42.6087	41.3846	40.9682	48.2697	36.7899	39.3303	39.4719	48.0466	49.7176	38.4596	55.4134	43.9463	40.6204	41.866	42.6316	38.1664	42.2761	40.1791	45.7719	34.858	33.847	47.4343	39.278
0.85_562.9551m/z	562.955	0.853783	0	0	0	0	0.435791	0	0	0	0	0	0	0	0	0.311279	0.0611081	0	0	0	0	0	0	44.4743	26.6035	42.487	28.608	34.6114	28.6499	27.8281	25.2578	25.9556	28.9286	18.8051	16.8021	12.6859	14.9166	13.9377	15.2147	13.348	18.0567	16.2379	15.8394	15.3732	31.9599	11.4123	20.5693	12.1794	5.45582
7.98_157.1311m/z	157.131	7.9751	1089.75	1392.2	951.165	704.018	640.69	507.545	382.273	316.177	422.014	376.234	273.472	238.894	153.842	253.752	233.268	218.926	189.743	213.641	202.994	252.698	167.762	762.606	473.199	411.588	391.028	393.74	574.464	567.463	562.101	415.726	391.441	366.679	164.659	338.129	232.959	217.396	178.244	369.962	200.011	221.31	179.502	177.444	448.857	438.342	632.239	705.167	558.85
1.67_185.0426m/z	185.043	1.67055	0.151642	0	0.190208	1.23228	0.242388	0	0	0	0.274117	0.327058	0	0.0251166	0.0240634	0	0	0.00398764	0	0.000869283	0	0	0	92.497	91.675	85.6561	76.3485	84.645	82.3389	73.6631	79.3519	76.7252	62.6848	69.6777	58.678	30.4596	40.2183	46.3855	41.815	47.4252	42.4783	38.3009	43.6186	47.1362	126.607	36.0618	72.4138	118.701	61.1041
7.04_179.5886m/z	179.589	7.03603	12.1923	11.4153	12.8047	12.1487	11.2551	10.5974	17.3618	14.1663	13.9414	12.8851	16.8657	17.3002	15.1225	7.01441	13.2761	12.4187	12.5932	8.54498	14.796	7.83051	10.562	12.8674	12.4366	10.7999	13.8411	9.62772	10.1636	10.8365	11.8012	11.0507	10.8656	15.8314	12.117	10.5653	8.28431	9.6086	6.89697	6.94487	6.36713	5.72844	8.75131	9.88321	9.73334	11.4444	17.6455	8.203	10.0134
0.84_60.0816m/z	60.0816	0.837567	0	0.0448892	0	0	0	0	0	0	0	0	0.0649033	0	0	0	0	0	0	0.0049966	0	0	0	6.02653	5.5469	6.70968	4.76478	5.38133	3.38543	5.27027	3.0384	5.13586	2.72545	4.86479	3.87466	2.94278	0.863867	2.90653	1.57654	1.08581	0.82629	3.10677	1.37058	1.61953	11.6138	2.68286	4.35774	7.1383	1.56211
0.85_537.0428m/z	537.043	0.848383	0	0	0	0.592809	0	0	0	0	0	0	0	0	0	0	0	0	0	0	0	0	0	37.9376	35.3215	33.023	30.0792	32.1043	20.4678	29.7827	19.8615	26.0611	15.0482	18.5812	13.0626	10.0622	7.39491	8.04889	4.86705	4.87869	12.3475	8.71433	8.59156	5.02868	39.9922	9.66493	26.2499	51.3011	20.0028
0.89_964.1000m/z	964.1	0.8862	0	0	0.0899452	0	0.203247	0	0	0	0	0	0	0	0	0.162903	0	0	0	0	0.746582	0	0	61.3851	63.2498	65.2467	64.8572	61.7893	45.1049	43.6182	43.0041	36.3169	26.4794	39.6914	24.5345	27.7311	30.5468	26.1992	22.2854	19.6028	29.3821	24.018	28.9128	27.2001	84.9139	8.49182	34.9297	66.3817	13.6556
0.86_898.7407m/z	898.741	0.864583	0.819305	0	1.39584	1.54053	0	1.51483	0	1.4425	0.497437	0.538025	0.747986	0.760254	0	0	0	0	0	0	0	0	0	416.874	413.042	387.06	380.943	366.728	262.681	321.353	249.904	252.509	225.485	232.068	155.688	156.182	180.949	177.714	169.61	173.983	163.963	191.349	160.131	197.166	420.89	50.1385	400.344	418.7	221.139
7.73_594.5750m/z	594.575	7.72513	78.774	86.5289	78.7724	308.991	95.8227	117.819	175.256	192.631	212.317	194.245	136.388	302.548	94.1867	136.982	107.038	108.193	102.659	107.033	113.715	99.433	112.467	78.4025	71.5135	83.2165	84.2559	75.404	89.4781	107.388	118.448	150.068	168.372	232.9	95.5875	93.4358	127.33	109.988	102.602	94.4493	98.9352	108.184	117.757	93.1536	71.3897	65.5546	93.0845	79.1026	96.4208
5.30_301.1793m/z	301.179	5.29982	3.84771	2.05359	1.4198	1.99181	1.57562	0.436473	1.60578	1.18822	0.551044	2.61688	0.87976	0.0371954	0.571806	1.3765	0.896013	2.12574	1.29906	0.456363	0.699842	0.27356	1.24598	865.717	902.046	869.886	848.448	859.187	746.416	659.718	686.185	696.119	623.145	669.59	689.964	710.066	725.929	677.674	600.464	634.587	581.187	617.087	684.108	647.149	1487.02	195.245	739.11	1281.22	908.756
1.19_361.0629m/z	361.063	1.19022	0	0	0.161865	0	0	0	0	0	0	0	0	0	0	0	0.601081	0	0	0	0	0	0	29.2031	26.6333	29.7416	31.7053	34.1846	22.3563	19.4163	18.5392	22.1376	17.9988	16.9556	10.1212	5.7324	6.94574	9.73661	5.23339	4.30585	5.27138	5.56739	5.4703	6.85923	26.1787	4.96375	25.4622	49.6858	8.80108
0.92_740.9499m/z	740.95	0.922017	0	0.668269	0	0	0	0.856934	0	0	0	0	0	0	0	0	0.176813	0	0	0	0	0	0	85.1496	80.0223	88.2367	105.63	102.199	62.3846	68.4272	40.2935	50.5731	53.4702	34.9318	31.027	39.5118	26.5295	24.1009	24.6272	28.7822	39.6906	27.5831	30.099	39.2407	86.2146	12.4084	50.6043	102.149	29.7619
3.74_433.7254m/z	433.725	3.74318	0	0	0	0.542068	0	0.217857	0.188882	0	0	0	0	0	0.0165013	0	0	0	0.0571089	0	0	0	0	41.9917	40.6587	41.59	37.0095	42.9521	36.4533	33.4208	28.4989	27.5513	23.5055	28.9784	17.3384	26.9967	31.3695	21.319	27.9473	23.5527	20.6449	17.18	21.7667	25.6264	115.358	8.00401	14.7183	60.4452	15.2281
7.99_150.5495m/z	150.55	7.99132	0.947876	2.45215	0.326965	2.00528	1.04039	2.31336	1.43939	1.0157	2.99149	1.42054	2.35547	2.20615	2.20865	1.61104	1.1833	1.6082	0.718231	1.44214	2.01329	0.769356	1.57062	0	0.424927	0	0.911392	0.542703	0.773857	0	0.671879	1.32135	0.658348	1.38728	2.01044	2.35613	2.88425	3.11121	1.08823	0	2.78742	0	2.60789	0.88723	1.31071	0.959579	1.88215	1.96223	1.08024
0.90_790.9798m/z	790.98	0.897017	0	0	0	0	0	0	0	0.455688	0	0	0.473724	0	0.16185	0	0	0	0	0	0	0	0	54.7822	54.8344	48.9056	64.1158	52.1689	42.9879	36.481	29.2399	20.1521	28.3245	19.6754	19.2474	33.321	21.7012	19.6625	22.2301	16.9584	29.1118	25.5534	14.2058	18.4517	54.3113	2.25609	26.5607	73.6523	13.1686
5.48_425.1730m/z	425.173	5.48155	0.256973	1.81827	0.96431	1.33453	0	0	2.89471	1.08231	1.33644	1.76299	1.01168	1.05486	0.797745	0.645325	1.65186	2.65174	0	2.3119	0	1.41982	0.772604	672.231	673.902	628.395	655.171	651.118	564.761	566.955	513.037	520.394	523.861	586.667	587.272	561.292	571.994	521.35	495.582	477.024	488.276	518.897	555.264	487.575	850.222	182.97	334.682	676.1	423.671
1.35_364.0634m/z	364.063	1.35033	0.504933	0	0	0.175049	0	0.541583	0.980616	0.14183	0	0	0	0	0	0	0.275299	0	0	0	0	0	0	107.697	107.701	99.2701	105.106	113.412	93.6081	84.1438	79.6132	83.1955	80.1032	78.3407	62.4948	42.7047	48.8624	55.4651	38.7191	48.8883	43.5193	48.4836	38.4209	44.561	239.328	37.7657	76.4801	164.12	84.0492
6.92_254.0855m/z	254.086	6.92253	97.5363	84.7908	93.0159	70.4218	44.6068	9.52889	7.85121	14.6123	7.62574	10.6613	9.49895	12.9834	10.3259	8.20992	7.08685	9.38719	6.48876	6.83955	2.49282	5.22576	8.05762	73.3858	64.2738	63.8744	65.2531	55.8259	49.7652	40.2755	9.7814	6.4746	8.65339	8.24128	8.49992	12.736	5.42956	5.51731	4.66007	2.29306	3.92597	3.02248	5.30533	7.05512	47.8153	48.3397	60.9854	65.5018	74.4793
6.97_320.9196m/z	320.92	6.96577	8.7246	7.83415	10.3537	9.47876	11.7306	4.72391	13.4782	11.3134	11.8955	10.3353	7.26543	11.2049	11.0807	9.16348	9.28144	7.151	9.45621	4.286	9.37813	10.3838	6.93188	11.8045	7.73483	8.48273	7.26783	7.20201	8.00586	7.18312	8.33073	6.47359	5.64796	6.8266	9.93831	7.92188	7.88545	7.99779	7.84003	6.93547	7.76322	7.53112	3.19775	5.48357	8.62604	9.48798	7.37354	6.87888	7.8046
0.85_530.8511m/z	530.851	0.853783	0	0.270774	1.17557	0	0	0.468506	0	0	0	0	0	0	0	0	0.575623	0.428406	0	0	0	0	0	114.923	106.363	106.491	86.9297	101.398	73.0523	82.7447	73.2819	63.7275	53.6931	60.6745	39.8349	34.9531	33.3469	23.952	24.3801	30.6013	38.0071	36.9193	29.1603	37.0063	97.2858	8.26932	107.499	118.706	74.4581
7.94_452.3136m/z	452.314	7.93928	5.65372	7.97353	5.08513	2.94273	12.5492	3.17225	4.7448	6.36093	5.1774	4.01861	7.34246	3.93858	4.82406	4.07532	4.54021	3.90734	8.80725	4.19942	5.50953	1.72247	6.29608	4.23378	5.01306	2.74341	8.56422	6.20062	4.11047	5.42698	6.69783	4.96506	6.35631	2.92216	1.16142	4.80494	7.92805	0.429455	1.29913	7.19232	2.7942	1.07464	3.71793	5.44219	10.1932	4.66364	7.66787	5.56364	4.27761
0.90_918.9953m/z	918.995	0.897017	0	0.258942	0	0	0	0	0	0	0	0	0	0	0	0	0	0	0	0	0	0.228946	0.763831	81.8941	57.2411	71.2183	88.5761	58.8387	62.0707	60.4939	34.7461	36.0984	36.1795	28.0371	28.9214	36.5126	33.9378	24.1444	16.0072	20.5612	32.7508	19.2219	21.6098	25.6592	68.0392	8.58103	32.0418	48.7197	14.6992
4.27_403.2218m/z	403.222	4.27228	0.434772	0.291979	0.526855	0	0.549403	1.08894	0	0	0	0	0.137356	0	0	0	0.269877	0.509766	0	0	0	0	0	141.274	137.247	139.672	143.275	129.333	121.738	101.636	94.0537	107.408	87.0291	90.3985	92.708	99.0565	119.336	102.951	97.8296	76.8786	93.6011	96.9353	107.457	87.325	409.801	37.0815	52.5467	204.079	23.6678
2.89_669.1044m/z	669.104	2.88858	0	0	0	0.764008	0	0.365484	0.305725	0.70955	0	0	0.786841	0	0	0	0	0	0	0	0	0	0	118.59	112.675	117.752	126.765	111.597	79.0916	111.132	97.523	89.7777	80.5318	99.5786	68.1763	69.7454	49.9776	68.6942	67.5781	52.5703	48.5783	52.3535	64.4859	44.5212	477.546	43.8019	62.2403	145.567	46.7951
0.84_683.1143m/z	683.114	0.842967	0	0	0	0	0	0.077836	0	0.451874	0	0	0	0	0	0	0	0.0615025	0	0	0	0	0	42.1549	38.7518	38.6098	28.3905	29.2285	29.7803	27.6494	18.5129	21.4114	11.0013	18.7804	14.5741	11.51	9.89943	4.94385	4.6872	4.29909	8.39631	5.32379	7.70303	7.01661	63.5671	10.8485	24.3713	43.8806	6.94497
4.81_320.1525m/z	320.153	4.80667	0.488412	0	0.659706	0.332382	0	1.15274	0.158638	0	0	0	0	0.53302	0	0.503887	0.725107	0	0	0	1.34875	0	0	219.014	200.45	193.965	205.112	202.88	170.96	164.07	160.925	175.875	149.319	163.553	167.222	162.364	175.68	159.205	154.493	140.29	144.445	152.562	167.31	141.979	485.274	33.9531	205.099	264.564	143.452
0.85_734.8085m/z	734.809	0.853783	0.997148	1.7363	0	0	1.64844	0	0	0.479553	0	0	0	0	0.641052	0	0.646118	0	0.618631	0	0.406403	0	0	334.305	306.408	335.805	316.566	314.526	211.084	270.121	201.99	235.186	182.321	175.488	116.197	129.493	140.472	154.421	128.304	126.001	146.982	135.358	136.62	138.403	345.299	48.8995	243.103	340.304	151.668
0.86_478.8366m/z	478.837	0.859183	0.477921	0	0.214922	0	0.932709	0.210571	0.564011	0.641876	0	0	0.363556	0	0	0	0	0	0	0	0	0.387253	0	149.218	118.284	118.678	117.232	113.894	81.3563	89.6168	94.4995	88.7462	78.8748	77.3998	44.7604	37.7057	48.3622	44.4393	35.2807	38.5859	43.2784	46.6976	35.002	45.4232	44.9093	15.423	268.637	94.4782	42.4283
2.58_520.7444m/z	520.744	2.58457	1.36519	1.07665	0	0.518585	0	0	0	0	0	0.608307	0	0	0	0	0	0	0	0	0	0	0	146.475	143.119	148.333	122.937	129.907	134.099	111.72	109.782	117.273	93.7354	115.742	81.3414	61.3711	59.8229	66.3158	52.6268	60.1924	50.2142	68.2969	59.069	62.8551	486.128	25.9769	90.4962	216.535	69.3314
0.99_555.1974m/z	555.197	0.992283	0	0	0.0273114	0.368088	0.474698	0.593602	0	0.494913	0.216248	0	0	0.0418521	1.25213	0	0.336664	0	0	0.427001	0	0	0.372914	203.86	210.296	203.944	201.921	203.131	168.153	169.021	183.094	203.112	161.917	175.369	118.962	88.8908	74.6718	91.6547	89.7661	82.2324	69.1134	66.6085	72.2622	72.3118	565.271	51.7715	98.6995	296.605	152.189
7.98_155.1545m/z	155.155	7.9751	317.627	376.146	274.917	395.783	329.897	158.841	140.89	86.8537	79.6206	105.073	81.2321	61.539	17.844	44.9744	32.3978	27.5658	18.3185	36.6621	27.0424	39.3218	26.7503	227.543	134.205	114.159	142.358	135.691	276.072	271.586	238.726	213.709	149.628	89.8494	22.6312	65.5494	32.7143	27.5722	15.6063	85.5466	30.2889	30.396	17.1643	28.9116	126.317	124.228	290.593	282.303	299.788
1.41_443.1121m/z	443.112	1.40977	0	0	0.598816	0	0	0	0	0	0	0	0.584369	0	0	0	0	0	0	0	0	0	0	65.7703	62.173	66.6459	59.3425	53.652	33.4554	33.8991	32.7085	36.4642	26.5189	32.8493	17.113	18.715	23.8525	26.7161	22.693	25.5928	18.5962	22.8651	22.3663	20.4718	181.413	10.1732	36.5324	104.393	32.3091
2.97_526.9287m/z	526.929	2.96963	0.211585	0	0	0	0	0	0	0	0	0	0	0.219906	0	0	0	0	0	0	0	0	0.43161	32.4226	31.7378	47.3758	50.9151	40.9192	17.8056	41.6816	26.5692	34.4953	33.9963	24.7206	24.2001	21.8807	19.8112	0.225466	26.6209	17.0931	18.2878	17.0921	15.6489	16.1229	101.627	3.95095	13.059	26.872	13.037
3.84_463.7295m/z	463.729	3.84047	0	0	0.951697	0.54129	0.49881	0	0	0.115361	0	0	0	0.340831	0	0	0	0.602707	0.0129828	0	0.461273	0	0.448423	143.76	144.47	139.344	142.103	134.043	117.151	129.323	111.377	123.402	106.075	112.287	100.865	106.61	95.0218	91.2593	84.9068	78.6905	78.7894	88.087	86.5259	73.9105	474.548	42.3709	92.7369	303.311	89.3322
7.46_319.1705m/z	319.17	7.46235	14.2098	5.82662	5.7296	8.43251	4.55509	10.2202	8.23007	9.69356	16.7887	16.0934	13.746	7.87657	11.6235	9.07025	12.0646	9.5235	11.3129	13.8519	12.2863	14.7924	13.8419	11.4201	10.5119	14.978	7.72601	8.53167	10.5944	6.13583	7.29649	7.86558	7.51137	11.5612	16.1703	8.20058	7.24212	9.19777	6.22748	5.71451	9.16351	8.0807	9.59866	6.41378	8.35095	8.58914	6.65497	6.78658	5.31591
0.86_439.8735m/z	439.874	0.864583	0	0.248016	0.472641	0.430893	0	0	0	0.735443	0	0	0	0	0	0	0	0	0	0	0.80874	0	0	114.209	115.914	122.052	119.482	126.667	85.7582	84.5935	95.6693	84.5341	70.6514	80.6083	46.1153	37.4586	54.2227	49.9556	43.2447	36.3479	40.151	36.3879	29.9782	40.6043	120.731	41.109	95.7675	102.333	79.6907
4.05_285.1443m/z	285.144	4.05472	0	0.0946328	0.492099	0	0.0322683	0	0.025506	0.526486	0.00295878	0	0	0.380295	0.0453342	0.180015	0	0.379146	0	0	0	0	0	79.6687	72.249	75.9874	82.3161	83.883	61.8412	66.3873	64.6171	69.5172	51.9828	63.1946	43.9444	57.5154	54.9462	57.451	44.4356	45.6007	47.1167	49.772	58.779	46.7811	287.794	12.8228	75.3967	104.295	72.6843
5.42_604.2429m/z	604.243	5.4221	3.54444	3.32973	5.85812	2.72902	2.92259	0.0223685	5.08142	4.26319	0.6875	3.41338	0.737676	1.99126	2.636	2.06308	3.11708	4.36672	1.54598	0.948543	2.50555	0.0741889	1.83691	1648.61	1668.38	1635.79	1611.67	1561.48	1409.73	1347.41	1352.68	1389.26	1303.42	1379.35	1295.58	1332.74	1308.62	1179.57	1093.85	1173.36	1072.83	1177.63	1208.93	1154.58	3523.31	604.037	279.852	2729.54	1588.15
7.21_379.0852m/z	379.085	7.21237	88.34	74.8007	69.416	67.9814	75.8981	26.168	64.2482	55.4187	37.3037	64.3346	89.4215	9.84194	17.4853	60.4919	57.2335	7.65065	9.16843	23.4041	34.2697	9.4482	6.08344	65.6016	75.9629	82.3568	69.122	78.2441	71.7509	61.3318	14.2508	55.7109	53.6875	32.3807	12.1532	47.7647	46.3602	8.73879	13.4635	10.61	27.5166	8.7686	10.357	4.29598	70.1957	75.8158	84.1438	67.0629	63.0048
0.87_622.7657m/z	622.766	0.87	0	0	0	0.74292	0	0.734223	0	0	0.965851	0.632812	0	0	0	0	0	0	0.655518	0	0	0.568115	0	217.391	231.553	204.388	208.056	209.001	119.917	164.09	155.667	150.67	134.175	134.091	67.902	85.311	91.4701	93.3621	69.7659	76.4862	85.3192	75.9901	62.4848	97.0138	203.995	25.2939	149.431	228.212	163.954
1.41_360.0320m/z	360.032	1.40977	0	0	0	0	0	0	0	0	0	0	0	0	0	0	0	0.277908	0	1.20161	0	0	0	79.7879	79.7811	83.3356	73.9755	67.6035	60.6139	56.1101	44.7805	54.7252	55.1917	50.8924	36.5026	28.6425	34.7799	29.6266	25.8952	28.4476	30.6363	33.2783	32.2635	33.6015	151.93	30.2472	63.4883	148.667	48.9498
0.90_1028.9491m/z	1028.95	0.897017	0.135618	0	0	0	0.589043	0.350368	0	0	0	0	0	0	0	0	0	0	0	0	0	0	0	59.429	62.3125	43.2801	58.9027	41.7525	44.3185	51.2271	31.3703	25.8253	25.4566	29.7484	29.8021	33.9031	18.1923	18.5068	9.03295	19.155	13.5685	21.8105	11.144	23.5104	54.1227	8.95654	34.7684	42.549	21.3835
0.89_642.9607m/z	642.961	0.8862	0	0.0783463	0	0	0.420765	0	0	0	0	0.37149	0.31012	0	0	0	0	0	0	0	0	0	0	57.9067	63.4064	56.4544	69.2787	60.7213	45.3577	35.3867	30.0259	30.6257	26.4702	17.3713	28.0111	31.6777	24.5457	28.0049	17.7264	20.045	17.8615	18.9822	19.4884	23.1385	49.2435	6.21901	25.2291	47.3249	10.6782
1.01_215.0564m/z	215.056	1.00848	0.259552	0	0.834898	0.874401	0.928174	0.631621	0.696304	0.660142	0	0.173035	0.0772821	0.544739	0	0	0.0255741	0.326843	0	5.32484e-05	0	0.298004	0	223.044	223.057	217.458	229.124	222.466	201.26	194.505	189.252	184.429	172.786	174.753	121.065	115.757	119.594	111.99	95.6595	85.2423	98.5758	94.3706	85.0904	106.962	219.402	139.011	178.492	263.085	158.908
0.89_1017.7132m/z	1017.71	0.8862	0	0	0	2.48904	0.509094	0	0	0	0	0.711273	0	0	0	0	0	1.15173	0	0	0	0	0	182.761	208.871	201.47	180.538	169.243	130.098	167.876	139.616	130.783	121.446	117.01	68.6628	81.8938	97.7852	90.9834	78.2049	92.8216	65.2022	80.4331	72.8781	85.7656	231.363	43.5408	212.04	189.338	100.272
6.46_105.9636m/z	105.964	6.45842	12.4354	11.6459	9.30282	11.4558	9.77806	11.244	12.7032	18.5286	23.8552	10.1377	11.85	9.2499	7.74489	9.34923	8.37661	12.6867	6.33545	9.28423	5.0328	11.3858	8.85601	8.27493	10.0686	7.64335	11.6279	12.2824	5.34964	9.07571	8.40093	13.0985	14.2508	21.3103	8.4393	5.36665	10.2118	6.59428	6.82544	6.15918	5.73814	9.32521	5.7998	6.16111	8.30113	8.24481	13.3312	9.69526	9.35266
1.37_301.0919m/z	301.092	1.37193	0	0.640671	5.57949e-05	0.396046	0.443543	0.417938	0	0	0	0	0	0	0	0	0	0	0.231766	0	0	0.371597	0	111.268	127.78	119.698	116.918	122.504	100.266	80.4479	83.1685	89.1705	82.4471	80.0486	45.6066	35.3381	48.6927	53.5954	36.0655	34.6134	37.4134	40.6451	42.394	38.9831	285.373	35.949	77.779	172.39	83.1512
4.63_334.0934m/z	334.093	4.63035	1.09124	0.808825	0.634296	0.736817	0.0163138	0.107941	0.582886	0.647429	0.582162	0.471115	0.978435	0.215881	0.341364	0.877357	1.27365	0.713415	0.249288	0.631091	0.219879	0.471344	0.826834	323.138	325.38	314.182	346.498	331.177	293.451	278.976	279.47	269.633	235.281	254.915	251.244	270.713	249.645	249.272	217.002	210.927	194.16	211.873	228.859	193.95	785.769	337.111	128.087	326.577	200.873
0.86_553.8549m/z	553.855	0.864583	0.338716	0	0	0	0	0	0.123856	0.468933	0.357912	0	0	0.00900703	0.645408	0	0.945296	0	0	0	0.0796591	0	0	146.279	131.844	129.34	138.418	142.844	101.133	111.255	102.669	104.654	92.7698	91.9509	56.0167	49.8175	65.0748	60.1895	54.948	41.729	39.775	58.1789	33.7314	62.317	151.162	21.5252	105.518	148.126	128.495
7.16_307.0900m/z	307.09	7.16373	7.99731	7.43887	5.06253	6.22825	7.34603	2.79921	6.38369	4.15849	7.04545	9.70406	10.3843	7.0914	7.26811	4.70322	7.96153	5.45632	3.48126	6.56749	7.20866	6.07333	5.35453	5.379	5.75921	5.55748	6.00215	6.53418	4.43683	5.23226	2.35353	4.90749	5.42784	7.55363	7.46196	6.28037	5.43221	6.61773	7.20949	4.74884	4.42171	3.46057	1.93226	4.36231	6.53026	8.64242	11.4814	3.74913	6.63949
0.86_582.8646m/z	582.865	0.859183	0	0.588024	0	0.421802	0	0.0448743	0	0	0	0.892242	0	0	0	0	0	0.692352	0	0	0	0	0	114.416	97.445	96.1352	86.6834	84.8834	71.4237	78.3136	60.059	68.6087	57.5314	54.6821	32.28	33.9007	44.9225	43.6126	29.9738	27.7388	42.671	48.9928	39.8335	47.113	104.869	12.4388	61.3161	69.3035	54.4342
7.23_295.1012m/z	295.101	7.2286	46.4058	44.6374	37.9594	42.4366	32.7008	16.3936	43.9767	41.694	21.9563	35.2321	48.0714	8.7972	10.5444	34.6199	38.6897	5.45497	9.09238	17	28.7657	4.96523	5.16201	34.332	40.9702	40.0841	42.3977	40.2672	39.0659	40.1758	14.8759	35.2632	32.0134	18.6747	9.20694	33.0765	31.5449	4.79482	8.08977	12.1975	19.2546	4.31698	5.09342	3.06789	40.8142	37.1365	40.7436	42.1658	39.9433
0.90_876.2910m/z	876.291	0.897017	2.17578	1.26865	0	0	0	0.613586	0.628265	0	0	0.0333315	1.73407	0	0	0	1.03516	0	0.582275	0	0	0	0	322.748	301.818	301.938	306.23	305.521	216.31	259.35	218.586	222.894	180.284	190.182	119.438	101.545	122.275	105.888	115.848	102.941	122.763	96.6054	115.273	133.169	335.827	132.778	301.659	342.688	98.1276
0.85_494.9739m/z	494.974	0.853783	0.0145694	0	0	0.550034	0	0	0	0	0	0	0	0	0	0	0	0	0	0	0	0	0	27.0245	19.7451	32.0926	23.5299	23.2883	14.5151	22.7076	15.7209	15.3366	20.0888	17.0759	8.43858	8.8025	15.5127	12.2675	6.3446	11.3615	11.4358	10.5665	6.56365	13.5703	26.1422	9.39331	15.2075	16.0279	3.69437
4.51_381.2255m/z	381.225	4.50805	0.324661	0.839655	0	0.49617	0.671718	0	0	0	0	0.677993	0.563293	0.427246	0.600833	0	0	0.264679	0	0	0.22644	0.238138	0	198.633	182.81	194.127	170.056	191.841	154.929	151.039	156.543	158.073	126.242	134.42	136.895	123.702	151.782	144.764	125.668	110.984	125.653	122.28	136.719	116.86	371.77	33.5441	136.742	275.917	176.825
0.85_568.9933m/z	568.993	0.848383	0	0.757294	0	0.125244	0	0	0	0	0	0.00431539	0	0	0	0	0	0	0	0	0	0	0	42.1801	48.1977	44.2446	33.9664	36.4545	24.3187	30.9194	18.7264	29.3339	15.7488	19.1945	16.8759	11.4422	17.8783	19.3587	10.103	10.2799	16.7345	12.5193	17.4748	16.3787	43.1964	13.6535	23.7281	24.2605	37.0573
0.86_1016.1955m/z	1016.2	0.864583	0	0	1.39764	0.935577	0	0	0	1.38831	0	0	0	0.865143	0	0	0	0.313782	0	0	2.51883	0	0	323.087	356.712	351.476	278.598	332.242	210.952	251.037	192.974	220.078	167.098	185.715	118.409	96.6691	131.805	161.271	127.059	105.864	141.029	146.284	125.831	155.421	376.264	62.7877	262.558	364.895	225.764
1.19_414.9820m/z	414.982	1.19022	0.0946346	0	0.000291905	0	0	0.476318	1.62414	0.0628749	0	0	0	0	0	0	0.00152151	0	0	0	0	0.825653	0	102.752	107.561	103.979	103.242	111.438	86.8871	85.7901	72.4583	73.9932	67.4503	73.2719	39.3541	39.9507	40.4478	45.4831	32.2594	32.3373	37.098	35.7418	32.2913	37.7728	68.9004	61.1904	119.638	109.336	77.766
7.80_439.8135m/z	439.813	7.80418	18.3784	15.65	16.4973	7.30783	8.1966	11.0482	19.9063	13.5289	10.2235	7.38838	16.001	21.55	1.2459	11.3339	9.22129	5.01625	7.47628	11.0751	4.57491	11.9389	8.81129	15.0786	15.3193	17.332	9.65822	10.1454	10.6516	9.80743	15.1151	9.83729	6.43468	12.1873	9.07894	17.337	4.55407	9.01925	5.59893	4.39183	4.85786	9.61441	3.08153	5.28927	10.964	11.1897	14.1796	6.86681	7.50446
7.80_181.1586m/z	181.159	7.80418	82.9938	105.32	75.9474	38.4876	56.8935	35.9799	28.0559	24.4442	29.8973	33.7738	28.2303	28.0483	23.547	27.4644	20.3142	21.8534	22.6179	25.0422	30.3751	27.737	18.6526	73.8254	38.8846	38.111	26.4345	27.2747	39.424	39.2174	35.8405	34.5312	27.5061	32.4309	25.3049	29.9106	28.5577	25.4498	22.5374	35.1258	17.1142	21.4219	23.7418	21.9538	29.3617	30.6581	45.0328	60.9968	44.1986
0.84_336.8441m/z	336.844	0.842967	0	0.228745	0	0.00709372	0.449173	0	0.0893288	0	0	0.0613695	0	0	0	0	0	0	0.240677	0	0	0	0	25.6174	28.8774	24.7106	23.7438	26.472	19.4706	18.0649	15.9395	21.29	16.5227	16.1805	14.9903	9.08928	7.78405	10.7344	8.0963	3.85004	7.37368	6.56944	7.47252	6.17566	20.5295	17.4502	55.9222	22.8005	50.2401
0.86_1081.1650m/z	1081.17	0.864583	0	0.93512	0	0	0	0	0	0.684204	0	0	0	0.626587	0	0	0.518127	0	0	0	0	0	0	115.518	130.947	129.848	139.562	109.954	91.1713	89.6528	95.3115	90.712	88.685	85.3422	53.0573	53.9022	49.7623	45.8772	39.0106	45.2716	51.8276	35.7915	40.6019	73.6773	169.355	28.2851	101.658	189.369	58.4597
0.93_705.1853m/z	705.185	0.927433	0	0	0	0.383453	0	1.12026	0.655853	0	0.50528	0	0	0.430176	0	0	0	0	0	0	0	0	0.662628	145.311	132.183	142.933	132.33	145.702	117.901	95.5939	96.9872	93.5139	91.6371	95.2212	66.4713	57.2564	55.1578	61.6317	57.4057	49.6744	55.9419	56.1712	43.5438	64.9821	127.222	46.0627	226.999	308.36	103.627
0.88_684.7654m/z	684.765	0.8808	0	0	0	0.892365	0	0	0	0	0	0	0	0	0.543762	0	0	0	0	0.549741	0	0	0	88.3012	87.0717	69.3382	99.093	102.792	42.4155	91.9375	86.5524	91.7259	73.0069	71.6028	32.5489	47.4773	58.3738	35.099	20.4673	23.5257	30.6654	31.4862	20.4028	43.6293	96.4758	3.9862	66.2289	119.548	74.1025
7.71_656.5925m/z	656.592	7.71433	22.5827	30.813	22.6795	61.2659	26.3105	31.6446	39.9258	35.7055	63.7272	52.6857	52.7302	66.4322	41.6575	30.7061	28.2137	28.0157	24.609	31.2954	33.1391	24.9706	26.8876	22.3442	23.2607	27.081	18.7405	25.1615	26.9356	21.0774	21.1097	35.3591	37.6597	52.0551	47.0412	24.3826	26.1354	30.5592	25.7517	25.0907	30.1779	41.0183	27.0036	30.155	23.9425	27.6404	26.3671	23.9018	25.9332
7.42_199.1714m/z	199.171	7.41573	163.715	173.691	76.3992	76.0813	63.0048	62.5941	51.8021	47.5002	78.5173	62.4125	57.0203	75.0963	54.7166	50.2996	56.2638	45.682	47.2815	51.7006	32.2355	49.2728	45.5426	60.1857	64.2627	53.7923	58.1229	55.5023	71.1201	71.1212	69.4127	62.6004	54.6573	68.5773	45.8038	53.3413	54.467	45.7531	39.4671	68.1658	47.3165	45.0478	39.7434	45.2854	57.0365	55.9577	77.9833	79.9986	76.764
0.88_806.7819m/z	806.782	0.8754	0	0	2.24368	0.591217	0	0	0	0	0	0.471954	0	0	0	0.819702	0	0	0	0	0	0	0	197.879	187.686	189.216	198.216	172.173	92.0974	120.285	146.338	137.973	126.876	126.223	70.0724	96.1055	105.197	63.0872	61.4909	79.7955	73.2313	70.474	64.6667	100.857	182.522	11.1197	133.927	217.581	113.678
0.89_810.7853m/z	810.785	0.8862	0	3.11826	0	0.828094	0	0	0	0.946869	0.969635	0	0	0	0	1.655	0	0	0	0	0	0	0	321.932	341.121	348.609	307.994	324.399	216.374	251.708	209.193	219.593	197.258	197.774	141.023	141.538	149.398	147.962	130.883	143.757	172.501	149.468	146.267	164.221	362.782	43.1257	240.543	355.624	154.468
7.86_209.1879m/z	209.188	7.85823	118.895	158.747	135.845	117.709	88.0124	58.2904	56.2514	57.1978	60.1796	61.4768	43.9803	43.2141	40.1647	43.0681	55.3966	36.0906	37.1517	46.5791	43.1048	44.2831	51.1699	111.002	60.343	60.2595	53.6531	49.9145	72.4727	66.5343	76.1059	54.4419	52.1812	70.4341	39.8184	46.4332	53.8733	48.5731	34.5453	66.8632	46.2057	34.85	36.486	39.5875	65.9346	58.6864	101.857	92.9564	64.3503
7.98_247.0314m/z	247.031	7.98052	6.00003	3.79946	5.33595	3.43155	5.90588	3.8658	3.06018	2.82562	4.93563	2.74091	6.02593	4.75031	5.37892	4.05375	5.39304	2.79203	2.77965	2.89904	4.33883	4.09011	4.02105	2.58935	1.25669	2.61801	2.61982	1.50597	3.27819	2.85119	5.38051	2.17796	3.7788	4.07543	7.30601	4.87969	4.19511	4.64726	3.28413	4.68205	3.01887	1.25421	3.07497	2.02666	3.3651	4.25476	4.18209	3.15389	2.6114
7.12_268.1005m/z	268.1	7.1205	226.107	213.721	196.889	225.942	203.385	46.1481	131.425	173.578	76.7483	131.829	205.035	58.6265	34.7573	78.0124	102.164	23.7345	34.3381	52.4337	80.0885	28.5742	22.1368	195.979	199.942	178.911	193.445	205.419	193.329	201.202	36.5442	126.183	131.732	52.8132	36.9183	96.1308	71.1826	32.419	38.6565	27.6954	47.7711	28.9898	28.591	31.3753	199.354	194.521	210.435	196.306	200.385
7.23_217.1555m/z	217.156	7.2286	24.0444	23.7712	23.1511	30.9703	26.0706	21.4115	25.785	17.4227	45.7471	26.8072	50.1567	138.776	32.1188	35.5586	35.8836	26.8531	29.1394	31.6811	23.8388	27.8454	30.7598	17.7518	26.8478	23.3824	19.3875	23.2019	23.1345	21.8246	22.9387	24.2628	19.0875	25.9383	37.1166	39.887	44.6551	32.1379	29.4672	25.9994	26.5785	32.6545	30.0801	33.7641	21.9211	15.6382	26.2014	24.5504	27.796
0.88_994.1957m/z	994.196	0.8754	0.800293	0	0	0.868042	0	0	0.744873	0	2.2139	0	1.10321	0	0.677155	0	1.10233	0	0	0	0	0	0	327.789	318.807	322.087	278.426	318.761	194.695	219.405	205.509	209.733	168.353	199.384	125.416	138.32	157.709	143.251	101.171	125.442	118.785	122.487	108.942	143.758	367.304	75.6764	235.771	377.244	203.839
7.04_261.0808m/z	261.081	7.03603	42.1843	31.8819	41.0484	38.7649	32.7658	28.7044	40.7695	34.1073	34.3077	32.5143	36.4238	34.7704	33.7642	31.4283	31.6783	29.4106	22.7399	26.4022	23.8378	21.0255	25.4556	36.9103	32.0128	28.6542	33.5796	34.9046	24.2831	26.7486	24.5085	22.542	29.7237	29.1897	22.8073	44.9535	26.0727	23.8475	19.6293	22.9417	23.5621	19.5028	19.2122	19.9238	34.7758	24.389	40.7208	23.7497	38.6595
3.28_712.3280m/z	712.328	3.28447	1.15171	0.658966	0	0.881143	3.32999	0.371777	2.70755	1.89253	1.20656	1.39071	0	0.444703	0.654114	0	0.796443	0	0.762095	0	0.806366	0.311325	0	650.874	618.313	591.004	603.087	593.486	544.494	513.381	509.068	487.392	458.852	428.308	354.028	340.846	333.399	334.328	336.51	319.591	300.292	293.549	332.484	294.867	1927.45	149.557	318.505	928.943	371.59
4.58_573.0051m/z	573.005	4.57832	0	0	0	0.153144	0	0	0	0	1.42158	0.00870783	0	0	1.29982	0.420438	0.0811342	0.983104	0.809498	1.01194	0.266785	0	0.235596	257.225	254.118	251.413	246.739	244.047	214.361	197.756	204.07	211.895	146.17	172.978	155.644	201.563	160.735	169.654	147.871	151.988	155.335	144.539	172.245	165.207	517.604	47.4443	26.8117	192.103	19.6242
4.71_480.1383m/z	480.138	4.706	0.793798	0.748627	0.60581	1.09717	0.581611	0.569606	0.236641	0	0	0.775943	0	0	0.651428	0	0.472586	0.570496	0	0	0	0.120264	0.589279	315.157	312.544	289.747	328.969	304.581	242.256	248.671	227.183	219.158	180.625	189.538	181.951	202.829	190.666	169.399	159.117	134.982	151.764	150.938	180.27	143.025	286.101	53.6285	257.382	363.417	421.137
0.87_872.7391m/z	872.739	0.87	0	0	0.088095	0	0	1.32483	0	2.90833	0	0.567932	0.277405	1.03909	0	0	0.303528	0	0	0	0.698273	0	1.6282	428.101	443.674	387.057	364.663	402.385	255.608	305.422	261.309	289.673	235.336	256.032	168.774	162.574	187.116	173.566	174.329	176.053	186.495	175.144	168.079	191.378	423.099	37.906	379.264	449.307	227.239
0.90_707.0245m/z	707.025	0.897017	0	0	0	0	0	0	0.354286	0	0	0	0	0	0	0	0	0	0	0	0	0	0	16.9621	18.372	17.9838	16.6091	22.7325	9.08339	14.5797	10.1971	7.86795	2.7734	10.5592	7.01231	6.11256	8.18232	5.70638	5.18014	4.67375	9.47942	5.1128	6.29636	3.97726	38.1627	1.89368	10.3438	27.2801	7.66355
7.49_181.1586m/z	181.159	7.49478	163.094	175.796	83.7077	67.4326	55.5191	57.7512	54.0754	34.9364	62.2334	58.1836	45.3715	52.5685	39.4672	35.2719	43.6037	32.8086	37.5648	42.5923	28.7481	36.1794	37.8124	75.6752	54.5738	50.2658	56.7628	52.6107	61.7138	66.2317	53.3248	57.611	43.4591	58.0819	37.5018	45.9866	49.2131	44.8531	40.3686	52.4143	34.0086	39.8554	32.698	37.3001	46.2294	48.8867	70.9828	78.1515	80.5853
7.80_167.1445m/z	167.144	7.80418	144.897	165.363	113.679	67.4758	77.4351	57.7284	44.5751	39.2368	52.7366	50.0766	37.4464	37.3351	29.0524	41.032	37.521	32.4505	27.0762	37.542	27.6894	35.9369	29.9753	94.1479	53.9134	48.6966	41.5573	43.8562	68.4139	65.2344	59.9264	51.2251	39.4606	45.4286	31.8285	53.7332	44.0575	35.6896	29.169	62.4639	31.2414	32.357	35.4125	31.1229	53.3899	51.2023	74.1153	100.873	80.7427
7.20_363.1132m/z	363.113	7.20155	24.0816	32.1029	30.5	30.6261	24.2994	15.1907	24.4924	20.8364	27.3381	23.9424	38.6616	20.91	23.4641	23.7169	27.5457	12.6226	11.4684	16.6913	19.2917	12.0718	12.0382	31.6715	24.4865	27.2081	28.7537	24.0563	27.1624	22.5528	15.6928	22.8488	18.1785	19.4025	18.9915	25.9208	24.3142	13.1858	9.37252	12.9621	11.7183	11.6802	12.2083	7.80337	21.5417	27.941	26.7865	26.6192	27.8905
7.80_139.1191m/z	139.119	7.79878	421.888	519.221	345.026	316.972	298.732	237.909	168.071	140.911	180.288	139.873	107.336	89.9492	59.2907	121.424	86.9197	72.7724	69.6643	101.874	67.9335	99.6012	76.9045	266.682	187.998	190.127	187.899	190.569	255.284	287.882	266.242	214.053	160.243	140.457	68.7494	162.658	94.9802	72.1877	66.2706	141.945	76.3259	90.1145	70.4373	64.7431	175.289	176.072	276.93	285.052	267.27
4.70_255.1740m/z	255.174	4.7006	0.0157375	0	0.338852	0.314721	0.080192	0.50261	0	0.343647	0.768852	0.0734627	0.0943451	0.371556	0.382731	0	0.514048	0.414651	0.154911	0.489922	0	0.372428	0	151.254	162.683	157.375	159.711	156.948	135.469	124.754	117.876	137.424	118.206	126.5	117.234	129.401	121.897	124.171	106.336	102.111	97.2703	100.419	123.403	98.6642	133.36	29.8077	136.78	196.383	253.781
6.83_337.1104m/z	337.11	6.82727	5.52628	3.24456	6.08681	6.4232	8.14532	5.78236	5.04795	5.70928	5.76272	8.44269	9.05273	10.4482	18.5125	8.61008	13.1486	6.92671	6.02903	5.40725	5.98474	4.67472	7.77805	7.06182	7.60216	7.54194	11.1124	9.94739	3.22145	5.34232	3.91191	3.7601	3.77633	4.63989	11.9594	7.45902	10.5501	7.30665	9.62646	6.06295	3.20465	3.41437	1.19158	3.93635	8.74023	4.62617	6.83823	11.0515	8.99711
0.90_257.0038m/z	257.004	0.897017	0	0	0.946572	0.00382235	0	0	0.166225	0.3685	0	0	0	0	0	0	0.316785	0.133102	0	0	0	0	0.216449	77.5745	75.593	71.7612	76.5606	79.264	51.3182	56.1082	48.1594	44.8323	42.7519	47.4163	39.5893	45.3064	44.4089	47.2926	38.371	39.615	42.634	43.3662	41.0016	45.1116	77.4612	23.8018	69.0373	85.4277	45.2906
1.10_301.0068m/z	301.007	1.10375	0.891129	0.212479	0	0	0	0	0	0	0	0	0	0	0	0	0	0	0	0	0	0	0	43.9125	41.5411	39.4647	39.49	46.0709	30.1111	29.4322	22.6773	23.7969	20.1971	22.2859	11.7966	9.69062	14.3602	17.0483	9.61896	17.8249	11.0459	14.05	12.6332	10.9445	43.5961	27.4627	36.2494	53.1492	34.1947
0.87_1177.1546m/z	1177.15	0.87	0	0	0	0.79834	1.57628	0.960938	0	0	0	0	0	0	0	0	0	2.83777	0	0.136381	0	0.457214	0	303.389	320.385	275.459	286.467	319.505	242.884	242.683	175.553	194.482	207.146	166.147	128.406	107.641	123.397	155.514	132.132	128.26	173.225	148.879	144.64	151.548	317.604	39.6941	281.295	359.251	209.048
0.86_1025.1849m/z	1025.18	0.864583	0	2.39159	0.567261	0	0.766665	0.33667	0	0	0	0	0	0	0	0	0.484314	0	0.820007	0	0	0	0	249.754	222.307	213.463	216.679	192.605	149.113	136.534	153.752	151.885	114.321	138.807	83.5211	100.199	119.473	97.0877	87.1042	65.3246	66.4783	101.009	69.6962	116.305	249.352	42.6945	186.292	268.116	153.316
5.82_492.2484m/z	492.248	5.82338	1.32893	3.54916	1.90798	2.62812	1.6044	1.93881	3.05664	0	0.620667	0.543121	0.636139	0	0.585542	1.29514	3.05563	0.920124	0	0.686107	0.617014	0	0	761.345	829.667	769.363	801.951	834.043	646.379	643.626	582.803	623.75	605.462	665.553	623.335	592.316	597.774	559.644	500.737	547.932	505.546	569.106	568.001	560.615	1564.54	334.525	589.145	1074.88	846.417
7.18_247.0360m/z	247.036	7.17993	93.9004	78.9648	90.4694	78.5564	79.1274	34.65	73.9504	72.6663	45.6332	79.2987	97.0729	20.8066	48.7781	54.9338	65.3512	28.7792	27.7152	36.3085	49.0202	24.6627	17.7761	83.5172	75.2335	77.2314	89.0476	73.6417	100.129	67.5826	35.2001	79.6952	57.9927	39.2891	32.2175	60.1748	51.4497	24.1443	24.4119	23.2566	31.5964	13.9286	16.8097	20.7558	81.8598	81.9044	87.1529	80.1072	87.0993
3.18_717.9919m/z	717.992	3.17838	0.597656	0.533832	0.645782	0	0.609375	0	0.0116679	0.1875	1.14258	3.81792	0	1.01959	0.849609	0	0.530732	0.844816	0	0.820313	0.950989	0.00107668	0.798859	461.948	455.051	459.223	508.397	475.216	404.772	365.275	379.716	375.123	308.955	337.456	255.799	280.589	268.056	287.774	240.471	211.406	243.791	256.781	252.429	227.173	1306.79	110.87	293.149	639.01	265.129
3.94_627.4838m/z	627.484	3.93573	0.550222	0	0	0	0	0.858921	0	0	0	1.04036	0.385684	0	0	0	0	0	0.164307	0	0	0	0	70.9869	89.0227	80.1375	103.153	91.0394	92.3094	76.7457	62.3663	89.6447	71.16	62.839	60.2844	59.636	56.2836	54.1155	45.5622	58.0284	56.6868	51.1918	56.0472	39.9508	211.656	5.43232	100.659	140.401	47.563
5.75_559.1940m/z	559.194	5.74772	0.341461	0.0297067	0	0	0.175903	0	0	0.444733	0	0	0	0	0	0	0	0.526323	0	0	0	0.444061	0	54.3986	63.8764	57.9733	64.0193	58.3098	48.9785	40.3271	49.167	42.082	35.0676	47.3835	30.2781	41.8578	41.8865	49.0366	34.7455	36.1269	28.8301	44.6992	32.0326	42.8445	65.922	22.8835	75.8058	64.4569	52.0172
0.88_1154.6587m/z	1154.66	0.8808	1.83862	1.73652	2.93574	1.8075	0	2.79547	1.51038	0.4021	0.912476	0	0.757324	1.5965	1.23419	0.744629	0.419038	0.68634	0	0.994263	0	1.56341	0	960.696	860.072	915.445	798.192	828.189	555.111	679.339	627.496	604.769	505.515	580.393	351.984	393.133	442.665	411.5	383.798	334.674	438.388	397.128	380.901	449.845	944.822	69.5006	951.166	1042.49	601.272
0.87_830.7352m/z	830.735	0.87	3.94073	0.594818	1.87145	1.51398	1.48	0	1.56589	0	0	0.953888	0.0958943	0.0201206	0	0	0	1.35031	0.790649	0	1.49634	4.3002	0	909.561	848.371	880.439	818.841	839.998	566.081	664.613	601.375	616.339	516.064	567.256	336.345	377.33	475.896	407.232	323.798	342.435	409.383	381.312	334.137	441.962	890.027	130.566	726.038	924.643	539.599
8.00_181.1586m/z	181.159	7.99672	56.1558	76.2286	67.8655	74.9569	49.1412	30.1986	32.073	31.2306	31.1317	29.0596	30.9437	20.8159	21.1155	27.4158	31.1191	22.807	21.4736	26.7336	21.2179	28.412	26.5919	51.1812	32.9821	28.4134	30.4962	26.0643	49.0662	31.5414	49.0972	35.1497	27.8443	33.554	20.6125	30.0853	28.9318	25.5992	21.4742	39.5478	22.7391	21.1148	19.3341	18.1404	32.9327	38.816	68.7145	54.3155	36.3117
7.84_179.1432m/z	179.143	7.84202	46.9632	53.138	52.0813	21.8247	22.9646	20.0968	12.9847	16.7396	17.538	17.5045	10.6517	13.2251	8.98038	14.2303	12.1321	9.78419	10.6154	15.9209	9.20563	9.82026	10.9775	37.2545	21.5229	14.7044	15.1605	14.5159	21.4062	18.9187	18.9664	19.0956	15.9824	21.2927	9.523	15.9148	11.9521	9.57492	7.00782	31.7912	8.7559	11.5624	11.6392	10.2563	16.4476	11.8384	26.6559	31.8893	27.174
3.14_591.7648m/z	591.765	3.14057	0	2.28526	0	0.420624	0.277008	0.987671	0.442034	1.23461	0.622288	0.756592	0	1.28568	0	0	0	0.370535	0.668885	0	0	0	0	322.223	350.348	328.979	335.488	329.246	285.872	282.789	286.534	273.535	232.089	246.633	192.481	198.644	180.925	182.549	170.025	160.976	157.303	177.532	194.536	172.607	1104.51	97.3604	230.068	594.952	212.741
3.47_254.0112m/z	254.011	3.4716	0	0	0.229029	0.184616	0	0	0	0	0	0	0	0.112945	0.279106	0.0790788	0.146637	0	0	0	0	0	0	41.2679	39.2109	45.3139	43.2103	42.015	36.351	31.5468	31.4348	36.9403	26.315	29.7591	18.2067	24.7384	24.7389	19.5386	17.7219	16.5449	21.7628	16.0509	26.3469	18.774	95.4019	21.6976	20.3123	67.5604	25.3645
7.17_200.2006m/z	200.201	7.17453	27.4308	14.1017	17.7866	16.6883	25.2234	16.6833	20.199	21.9723	24.6967	24.0536	35.3634	54.7834	20.3951	17.3174	19.5521	12.8671	17.6335	18.1671	14.7417	13.5261	15.3823	19.657	19.1222	23.8294	19.4151	20.6713	22.011	18.4778	16.3605	17.3723	17.9279	23.3829	14.3782	18.9077	22.6727	17.853	16.7526	14.9581	15.9814	12.1635	14.9272	13.7138	17.1361	16.7118	22.311	21.2625	22.0373
0.84_320.8685m/z	320.868	0.842967	0	0.177633	0.363117	0	0	0.275229	0.499961	0	0.242661	0.15708	0	0	0	0	0	0.525866	0.0561693	0	0	0	0	82.5532	68.293	78.3963	54.275	68.7555	44.1114	48.8747	47.9691	50.753	40.9714	36.8138	35.1989	27.9604	31.6323	26.896	28.5534	18.5761	23.5491	21.7586	25.897	25.1658	39.2759	44.5333	85.1442	62.4836	109.893
5.20_328.2110m/z	328.211	5.20255	3.52502	2.87648	4.99128	1.5191	4.13121	2.54228	3.50464	3.58427	3.15245	5.34471	4.26296	3.43239	3.4637	2.0728	1.44058	5.23461	1.18501	4.32705	3.29167	2.53183	1.71993	1948.45	1933.89	1879.41	1905.21	1874.94	1725.16	1591.81	1587.55	1646.9	1533.16	1737.94	1671.25	1650.1	1680.71	1535.07	1462.21	1490.18	1374.46	1470.62	1609.51	1459.69	3966.27	510.711	1199.48	3922.82	1392.11
7.16_217.0623m/z	217.062	7.15832	33.8839	32.5485	39.0934	32.6648	26.1804	26.9184	33.6961	32.2716	44.7128	37.6603	49.0744	43.8699	51.6113	32.4296	44.9615	38.1429	36.8937	40.1475	32.2555	30.1663	30.3882	29.1429	31.3968	23.5517	29.1959	31.6389	29.4191	32.2653	28.2599	30.4004	31.1357	32.5993	42.3338	51.3326	38.1708	28.1131	26.8769	25.8088	26.6178	23.6263	24.1996	26.8739	27.3489	30.2185	33.3099	31.6917	35.5217
7.64_225.2204m/z	225.22	7.64408	43.553	48.3518	29.6246	28.955	24.3538	18.9725	21.789	16.3625	29.9623	27.2436	24.3015	22.544	25.1283	18.0866	30.8004	17.183	21.7578	20.438	22.7023	16.8207	20.4606	25.2202	15.8579	16.0076	15.5877	14.6151	24.5905	22.8808	22.8559	25.1179	15.9253	24.4977	18.9295	25.8511	23.2948	19.5914	21.3918	25.4079	20.4693	20.1701	21.0173	15.7556	17.7356	13.203	25.0409	25.8987	26.0288
7.16_158.5654m/z	158.565	7.15832	7.69442	6.35577	3.7733	5.55094	5.72549	4.95154	6.97173	6.46379	8.98876	6.9005	9.84665	5.75948	9.42587	4.23014	9.28107	8.33588	8.01806	6.44468	6.68134	6.63223	3.99512	4.59372	3.70446	4.60362	6.15378	6.26727	3.2153	4.59181	3.17882	6.78702	6.20794	9.49336	4.80363	3.79456	8.39614	8.37733	7.82741	3.39656	2.21725	5.93356	9.28864	4.92715	5.0615	5.69089	5.91188	4.60119	7.369
7.21_274.0542m/z	274.054	7.20697	74.7777	62.9677	64.8902	71.3821	64.4312	22.4315	58.2376	62.3984	37.5247	54.9671	72.5021	10.7868	13.6668	38.6852	48.0239	9.84339	8.2514	16.439	31.6058	7.4646	7.81966	62.7233	59.2073	70.142	64.5707	62.4459	69.7502	63.0635	14.9139	53.4249	49.8154	24.6258	11.8391	45.0454	35.9214	9.79697	9.53041	8.91963	30.7307	7.62205	9.48132	8.56337	67.5815	63.9027	70.8985	63.4003	61.2385
7.94_109.5120m/z	109.512	7.93928	194.288	181.003	191.603	194.357	161.621	171.613	196.596	173.837	219.137	224.872	240.101	262.981	260.313	212.52	232.169	210.76	206.568	215.585	207.823	177.986	210.32	158.864	149.811	153.992	158.213	159.632	160.651	134.085	132.352	179.142	143.41	197.703	221.933	200.734	204.642	204.391	172.563	161.189	174.502	163.08	198.685	167.439	157.466	165.781	201.304	163.406	170.688
7.16_272.6878m/z	272.688	7.16373	29.8279	20.1837	23.0395	21.4679	19.3743	14.6274	20.9493	22.4559	17.2667	19.4958	19.8396	24.6742	19.8124	15.7538	22.026	16.0492	19.2251	12.3993	14.1917	14.0352	12.5737	19.6943	24.1355	20.2311	21.7086	23.436	16.8281	17.1268	18.6668	23.3521	12.117	18.6444	19.9105	13.7471	13.3936	15.3312	17.3183	8.77784	12.9218	12.6031	11.1591	7.41498	28.8596	19.76	23.5594	18.5212	18.615
4.55_295.1170m/z	295.117	4.54588	2.11562	0.859303	0.196576	0	1.06625	0.940383	1.49905	0.778802	0.891324	0	0.627182	0.578064	0	0	0.251832	0	0	0	0.713913	0.0131803	0	330.55	340.154	354.133	332.363	340.695	279.251	300.462	275.306	294.861	245.525	244.765	238.683	265.627	250.978	218.322	228.464	213.883	208.063	203.38	233.928	191.564	784.659	98.511	244.713	511.488	268.253
0.86_688.7732m/z	688.773	0.864583	0	1.2439	0	0.442444	0	0	0.504883	4.49794	0	0.916306	0.424561	0	0	0	0	0.328106	0	0.0216967	0	0	0	373.144	384.737	377.537	344.854	369.107	254.703	274.037	226.092	254.734	197.003	216.323	136.247	141.083	178.635	163.274	158.926	148.085	155.009	135.165	146.788	169.793	369.295	48.5675	217.296	339.498	203.539
0.86_542.7498m/z	542.75	0.864583	0.411716	0.0610583	0.497974	0	0	0	0.321075	0	0	0	0	0	0	0	0	0	0	0	0	0	0	43.9163	33.7816	40.7319	40.0945	40.1736	27.1696	32.1322	29.5193	33.3859	24.9116	19.1144	12.7636	9.89276	13.249	16.6054	6.38476	9.55602	14.2047	13.6689	6.13326	12.8206	27.2093	2.09687	42.9783	57.5803	110.257
0.85_631.1129m/z	631.113	0.848383	0	0	0.395508	0	0	0	0	0	0	0.446254	0	0	0	0	0.373683	0	0	0	0	0	0	54.4457	57.4087	56.9809	56.6371	55.139	41.2681	35.6469	43.8244	38.2559	28.8864	33.8022	22.1724	12.9378	22.9341	16.1463	15.9354	14.0028	11.4575	18.3306	11.925	14.7524	110.058	24.328	67.2153	105.986	69.6038
0.85_566.8913m/z	566.891	0.853783	0	0	0	0.958265	0.905701	0	0	0	0	0.369629	0	0.0522478	0	0	0.182062	0	0	0	0	0	0	108.402	109.736	106.203	97.9072	103.479	70.1425	67.9794	62.8875	68.7169	54.686	60.3468	33.1188	34.6991	46.9207	40.9394	31.866	43.2975	39.9576	32.4145	39.8073	47.0853	99.0931	14.4479	61.3168	86.3958	66.5916
5.86_436.7740m/z	436.774	5.8592	3.19075	6.63427	5.43991	6.36079	2.12519	3.87626	1.72742	7.61866	6.44638	3.39465	6.60437	1.5605	2.73677	2.28137	2.23354	4.46854	3.92769	0.283264	3.33418	3.37391	3.80045	2.24604	4.38155	2.00931	6.20069	1.3709	6.19041	2.00711	0.830978	3.16957	4.31253	3.6496	2.16473	5.6967	3.11594	6.19073	4.08842	2.43449	0	1.84167	3.64016	2.80014	0.718103	15.0822	0.708801	4.77901	3.25684
5.06_401.1625m/z	401.162	5.05865	1.96589	1.12087	0.403069	0.749741	1.84282	0.92041	0.585793	0	0.860448	0.488664	0.0195606	2.02377	0.0504089	1.73104	1.05649	0.201447	0.460236	0.945924	0.54444	0	0.648883	535.061	540.508	516.994	533.2	526.777	469.228	442.759	436.155	455.132	375.948	416.436	421.689	427.902	442.595	378.805	378.01	348.345	349.498	371.126	433.337	376.719	834.443	160.88	383.598	881.025	500.863
3.28_820.5774m/z	820.577	3.27907	1.29232	0.359783	1.16898	0	0.658952	0	0.00442938	0	0	1.25122	1.02676	0	0	0	0	0.139919	0	0	0.438599	0	0	241.542	207.117	233.301	260.989	213.937	175.471	198.698	173.454	165.683	185.951	176.91	114.029	126.297	127.265	128.382	98.316	101.682	106.282	117.395	110.943	113.889	652.633	75.9313	110.327	306.897	94.0807
[truncated: 5,645 more rows]
[truncated: 200 more columns]

## Sheet: NEG_dataset
group[Bronchiolite]			Blank	Blank	Blank	Blank	Blank	Blank	Blank	Blank	Blank	Blank	Blank	Blank	Blank	Blank	Blank	Blank	Blank	Blank	Blank	Blank	Blank	QC	QC	QC	QC	QC	QC	QC	QC	QC	QC	QC	QC	QC	QC	QC	QC	QC	QC	QC	QC	QC	QC	QC	noBRO	noBRO	noBRO
[truncated: 5,711 more rows]
[truncated: 202 more columns]
