# Supplementary material for: Metabolomic Profile at Birth, Bronchiolitis and Recurrent Wheezing: A 3-Year Prospective Study
Source: Metabolites. 2021 Nov 30;11(12):825. doi: 10.3390/metabo11120825 (PMC8706329; doi:10.3390/metabo11120825)
Supplement: Supplementary file 1 [file metabolites-11-00825-s001.zip › Table_S2.xlsx]

## Sheet: Table_S2
Table S2. 156 Variables identified in ESI+ and ESI- searching our in-house database , corresponding to 131 metabolites
variableID	ionization	adducts	formula	annotation	CLASS/PATHWAY
0.84_170.0931m/z	ESI+	M+H	C7H11N3O2	L-3-Methylhistidine	histidine and derivatives/Histidine metabolism
0.90_118.0613m/z	ESI+	M+H	C3H7N3O2	Guanidinoacetic acid	Carboxylic acids and derivatives/Arginine and proline metabolism
1.02_222.0970m/z	ESI+	M+H	C8H15NO6	N-Acetyl-galactosamine	N-acyl-L-alpha-amino acids
0.90_175.0693m/z	ESI+	M+H	C6H10N2O4	N-Acetyl-Asparagine	N-acyl-L-alpha-amino acids
3.72_206.0457m/z	ESI+	M+H	C10H7NO4	Xanthurenic acid	Quinoline carboxylic acids/Tryptophan metabolism
4.85_137.0604m/z	ESI+	M+H	C8H8O2	Phenyl acetate	aromatic fatty acid/metabolite of phenylalanine
0.93_118.0869m/z	ESI+	M+H, M+H-FA	C5H11NO2	L-Valine	L-alpha-amino acids
3.94_190.0505m/z	ESI+	M+H	C10H7NO3	Kynurenic acid	Quinoline carboxylic acids/Tryptophan metabolism
1.04_246.1447m/z	ESI+	M+H	C10H19N3O4	Leu-Gly-Gly	Tri peptide
3.65_192.0660m/z	ESI+	M+H	C10H9NO3	5-Hydroxyindolacetic acid	Indolyl carboxylic acids and derivatives/Tryptophan metabolism
1.34_268.1032m/z	ESI+	M+H	C10H13N5O4	Adenosine	Purine nucleosides/Purine metabolism
0.94_104.0713m/z	ESI+	M+H	C4H9NO2	g-Aminobutyric Acid	Gamma amino acids and derivatives/Glutamate metabolism
0.83_156.0773m/z	ESI+	M+H	C6H9N3O2	L-Histidine	histidine and derivatives/Histidine metabolism
1.34_153.0405m/z	ESI+	M+H	C5H4N4O2	Xanthine	Purines and purine derivatives /Purine metabolism
1.23_137.0465m/z	ESI+	M+H	C5H4N4O	Hypoxanthine	Purines and purine derivatives /Purine metabolism
3.43_197.0681m/z	ESI+	M+H	C7H8N4O3	1,7-Dimethyluric acid	Purines and purine derivatives /Caffeine Metabolism
0.85_188.1763m/z	ESI+	M+H	C9H21N3O	N1-Acetylspermidine	polyamine/origin from L-ornithine and methionine
4.25_195.0883m/z	ESI+	M+H	C8H10N4O2	Caffeine	Purines and purine derivatives/Caffeine metabolism
1.10_245.0776m/z	ESI+	M+H	C9H12N2O6	Uridine	Pyrimidine nucleosides/Pyrimidine metabolism
1.66_268.1045m/z	ESI+	M+H	C10H13N5O4	Deoxyguanosine	Purine nucleosides/Purine metabolism
1.18_169.0363m/z	ESI+	M+H	C5H4N4O3	Uric acid	Purines and purine derivatives /Purine metabolism
0.98_119.0341m/z	ESI+	M+H	C4H6O4	Succinic acid	Dicarboxylic acids and derivatives/Citric acid cycle
1.42_117.0189m/z	ESI+	M+H	C4H4O4	Fumaric acid	Dicarboxylic acids and derivatives/Citric acid cycle
1.20_193.0359m/z	ESI+	M+H	C6H8O7	Citric acid	Tricarboxylic acids and derivatives/Citric acid cycle
0.83_147.1130m/z	ESI+	M+H	C6H14N2O2	L-Lysine	L-alpha-amino acids
4.84_195.0638m/z	ESI+	M+H	C10H10O4	Phenylsuccinic acid	Dicarboxylic acids and derivatives
2.58_159.0663m/z	ESI+	M+H	C7H10O4	Succinylacetone	Keto acids and derivatives
3.46_181.0496m/z	ESI+	M+H	C9H8O4	4-Hydroxyphenylpyruvic Acid	Phenylpyruvic acid derivatives/Tyrosine catabolism
1.31_130.0506m/z	ESI+	M+H	C5H7NO3	L-Pyroglutamic	Carboxylic acids and derivatives/Glutathione metabolism
3.93_107.0499m/z	ESI+	M+H-FA	C7H6O	o-HydroxyPhenylAcetic Acid	Phenylacetic acids /microbial metabolite
1.53_218.1387m/z	ESI+	M+H	C10H19NO4	Propionylcarnitine (C3 carnitine)	Acylcarnitine/b-oxidation of fatty acids
3.48_246.1703m/z	ESI+	M+H	C12H23NO4	Valeryl carnitine (C5 carnitine)	Acylcarnitine/b-oxidation of fatty acids
4.69_260.1858m/z	ESI+	M+H	C13H25NO4	L-Hexanoylcarnitine (C6 carnitine)	Acylcarnitine/b-oxidation of fatty acids
6.51_344.2775m/z	ESI+	M+H	C19H37NO4	Dodecanoylcarnitine (C12 carnitine)	Acylcarnitine/b-oxidation of fatty acids
6.53_287.2003m/z	ESI+	M+H	C19H26O2	Androstenedione	Steroids and steroid derivatives
6.98_315.2311m/z	ESI+	M+H	C21H30O2	Progesterone	Steroids and steroid derivatives
6.53_289.2143m/z	ESI+	M+H	C19H28O2	DHEA	Steroids and steroid derivatives
6.72_299.2370m/z	ESI+	M+H-H2O	C21H30O	Pregnenolone	Steroids and steroid derivatives
5.79_363.2162m/z	ESI+	M+H	C21H30O5	Cortisol	Steroids and steroid derivatives
5.35_361.2016m/z	ESI+	M+H	C21H28O5	Aldosterone	Steroids and steroid derivatives
6.65_385.2370m/z	ESI+	M+H	C24H32O4	Megastrol Acetate	Steroids and steroid derivatives
6.40_331.2239m/z	ESI+	M+H	C21H30O3	21-Hydroxyprogesterone	Steroids and steroid derivatives
7.30_273.1832m/z	ESI+	M+H	C18H24O2	beta-Estradiol	Steroids and steroid derivatives
6.15_347.2215m/z	ESI+	M+H	C21H30O4	11-Deoxycortisol	Steroids and steroid derivatives
5.78_271.1667m/z	ESI+	M+H-H2O	C18H22O2	Estriol	Steroids and steroid derivatives
3.26_205.0973m/z	ESI+	M+H, M+H-NH3	C11H12N2O2	L-Tryptophan	L-alpha-amino acids
6.42_305.2106m/z	ESI+	M+H	C19H28O3	11-ketoetiocholanolone	Steroids and steroid derivatives
6.60_273.2194m/z	ESI+	M+H-H2O	C19H28O	5beta-dihydrotestosterone	Steroids and steroid derivatives
5.95_305.2096m/z	ESI+	M+H	C19H28O3	11b-hydroxytestosterone	Steroids and steroid derivatives
5.54_303.1958m/z	ESI+	M+H	C19H26O3	19-hydroxyandrostendione	Steroids and steroid derivatives
6.07_301.1825m/z	ESI+	M+H	C19H24O3	11-ketoandrostenedione	Steroids and steroid derivatives
5.40_305.2098m/z	ESI+	M+H, M+H-2H2O	C19H28O3	7a-OH-DHEA	Steroids and steroid derivatives
6.82_369.1707m/z	ESI+	M+H	C19H28O5S	Epitestosterone sulphate	Steroids and steroid derivatives
6.74_335.2563m/z	ESI+	M+H, M+H-H2O	C21H34O3	Allotetrahydrodeoxycorticosterone	Steroids and steroid derivatives
6.30_363.2168m/z	ESI+	M+H	C21H30O5	Dihydrocortisone	Steroids and steroid derivatives
6.15_365.2309m/z	ESI+	M+H	C21H32O5	Tetrahydrocortisone	Steroids and steroid derivatives
5.36_363.2161m/z	ESI+	M+H	C21H30O5	20-beta-dihydrocortisone	Steroids and steroid derivatives
0.95_132.0754m/z	ESI+	M+H	C4H9N3O2	Creatine	Carboxylic acids and derivatives /Arginine and proline metabolism
1.39_182.0817m/z	ESI+	M+H, M+H-FA	C9H11NO3	L-Tyrosine	L-alpha-amino acids
0.81_163.1090m/z	ESI+	M+H	C6H14N2O3	5-hydroxylysine	L-alpha-amino acids and derivatives
7.13_373.2712m/z	ESI+	M+H-H2O	C24H36O3	7-ketolithocholic acid	Bile acids, alcohols and derivatives
7.23_393.2993m/z	ESI+	M+H	C24H40O4	Isodeoxycholic acid	Bile acids, alcohols and derivatives
6.28_403.2434m/z	ESI+	M+H	C24H34O5	Dehydrocholic acid	Bile acids, alcohols and derivatives
6.04_530.2768m/z	ESI+	M+H	C26H43NO8S	Glycoursodeoxycholic acid 3-Sulfate	Bile acids, alcohols and derivatives
6.89_430.2950m/z	ESI+	M+H-2H2O	C26H39NO4	Glycocholic acid	Bile acids, alcohols and derivatives
6.75_355.2611m/z	ESI+	M+H-SO4H2-2H2O	C24H34O2	Cholic acid 3-sulfate	Bile acids, alcohols and derivatives
3.10_181.0743m/z	ESI+	M+H	C7H8N4O2	Paraxanthine	Purines and purine derivatives/Caffeine metabolism
2.10_209.0929m/z	ESI+	M+H, M+H-NH3	C10H12N2O3	L-Kynurenine	Carbonyl compounds/Tryptophan metabolism
0.94_277.1400m/z	ESI+	M+H	C11H20N2O6	saccharopine	Glutamic acid and derivatives/Lysine degradation
1.12_130.0870m/z	ESI+	M+H	C6H11NO2	Pipecolic acid	Alpha amino acids/metabolite of lysine
0.95_336.1372m/z	ESI+	M+H	C12H21N3O8	Aspartylglucosamine	Glycosylamines
0.92_114.0670m/z	ESI+	M+H	C4H7N3O	Creatinine	Alpha amino acids and derivatives/breakdown product of creatine phosphate
0.89_154.0859m/z	ESI+	M+H	C8H11NO2	dopamine	Catecholamines and derivatives /Tyrosine metabolism
4.21_183.0653m/z	ESI+	M+H, M+H-FA	C9H10O4	Homovanillic acid	Methoxyphenols/Tyrosine metabolism
1.07_189.1240m/z	ESI+	M+H	C8H16N2O3	N-eps-Acetyl-Lysine	N-acyl-L-alpha-amino acids
0.69_145.0980m/z	ESI-	M-H	C6H14N2O2	L-Lysine	L-alpha-amino acids
0.69_161.0929m/z	ESI-	M-H	C6H14N2O3	DL-5-hydroxylysine	L-alpha-amino acids
0.72_154.0620m/z	ESI-	M-H	C6H9N3O2	L-Histidine	L-alpha-amino acids
0.72_168.0777m/z	ESI-	M-H	C7H11N3O2	L-1-Methylhistidine	Carboxylic acids and derivatives/Histidine Metabolism
0.72_225.0985m/z	ESI-	M-H	C9H14N4O3	L-Carnosine	L-alpha-amino acids
0.72_239.1130m/z	ESI-	M-H	C10H16N4O3	L-anserine	Hybridpeptides/Histidinemetabolism
0.75_131.0825m/z	ESI-	M-H	C5H12N2O2	L-Ornithine	L-alpha-amino acids
0.75_74.0250m/z	ESI-	M-H	C2H5NO2	Glycine	L-alpha-amino acids
0.76_104.0353m/z	ESI-	M-H	C3H7NO3	L-Serine	L-alpha-amino acids
0.76_112.0515m/z	ESI-	M-H	C4H7N3O	Creatinine	alpha amino acids and derivative
0.77_221.0634m/z	ESI-	M-H	C7H14N2O4S	L-Cystathionine	L-alpha-amino acids
0.78_120.0124m/z	ESI-	M-H	C3H7NO2S	Cysteine	L-alpha-amino acids
0.78_275.1251m/z	ESI-	M-H	C11H20N2O6	saccharopine	Glutamic acid and derivatives /Lysine Degradation
0.78_334.1250m/z	ESI-	M-H	C12H21N3O8	Aspartylglucosamine	Glycosylamines
0.79_128.0351m/z	ESI-	M-H-H2O	C5H7NO3	N-Acetyl-serine	N-acyl-L-alpha-amino acids
0.80_201.1353m/z	ESI-	M-H	C8H18N4O2	symetric dimethyl-L-arginine-SDMA	Arginine and derivatives
0.81_103.0038m/z	ESI-	M-H	C3H4O4	Malonic acid	Dicarboxylic acids and derivatives/aspartate metaboilsm
0.81_199.9691m/z	ESI-	M-H	C3H7NO5S2	Sulfocysteine	L-alpha-amino acids
0.81_75.0087m/z	ESI-	M-H	C2H4O3	Glycolic acid	Hydrocarbonderivatives
0.82_135.0297m/z	ESI-	M-H	C5H4N4O	Hypoxanthine	Purines and purine derivatives/Purine Metabolism
0.84_132.0302m/z	ESI-	M-H	C4H7NO4	L-Aspartic acid	L-alpha-amino acids
0.92_117.0192m/z	ESI-	M-H	C4H6O4	Succinic acid	Dicarboxylicacids and derivatives
0.93_115.0035m/z	ESI-	M-H	C4H4O4	Fumaric acid	Dicarboxylic acids and derivatives/TCA Cycle
0.93_191.0193m/z	ESI-	M-H	C6H8O7	DL-Isocitric acid	Tricarboxylic acids and derivatives/TCA Cycle
0.95_187.1085m/z	ESI-	M-H	C8H16N2O3	N-eps-Acetyl-Lysine	N-acyl-L-alpha-amino acids
0.97_243.0619m/z	ESI-	M-H	C9H12N2O6	Uridine	Pyrimidinenucleosides
1.02_174.0405m/z	ESI-	M-H	C6H9NO5	N-Acetyl-aspartic acid	N-acyl-L-alpha-amino acids
1.04_167.0209m/z	ESI-	M-H	C5H4N4O3	Uric acid	Purines and purine derivatives/Purine Metabolism
1.07_191.0193m/z	ESI-	M-H	C6H8O7	Citric acid	Tricarboxylic acids and derivatives/TCA Cycle
1.18_128.0350m/z	ESI-	M-H	C5H7NO3	L-Pyroglutamic	L-alpha-amino acids
1.22_151.0258m/z	ESI-	M-H	C5H4N4O2	Xanthine	Purines and purine derivatives/Purine Metabolism
1.25_180.0656m/z	ESI-	M-H	C9H11NO3	L-Tyrosine	L-alpha-amino acids
1.31_117.0192m/z	ESI-	M-H	C4H6O4	Methylmalonic Acid	Dicarboxylic acids and derivatives/propanoatemetaboilsm
1.35_282.0841m/z	ESI-	M-H	C10H13N5O5	Guanosine	Purine nucleosides
1.51_130.0874m/z	ESI-	M-H	C6H13NO2	Leucine	L-alpha-amino acids
1.60_267.0735m/z	ESI-	M-H	C10H12N4O5	Inosine	Purine nucleosides
1.72_103.0401m/z	ESI-	M-H	C4H8O3	alfa-HydroxyIsoButyric Acid	Hydrocarbonderivatives
1.75_162.0233m/z	ESI-	M-H, M-H-C2H2O	C5H9NO3S	N-Acetyl-cysteine	N-acyl-L-alpha-amino acids
1.91_197.0453m/z	ESI-	M-H	C9H10O5	VanillMandelicAcid	Hydrocarbonderivatives/Tyrosinemetabolism
1.93_131.0348m/z	ESI-	M-H	C5H8O4	Glutaric acid	Dicarboxylic acids and derivatives/lysine and tryptophan metabolism
1.99_190.0508m/z	ESI-	M-H-NH3	C10H9NO3	L-Kynurenine	Carbonylcompounds/TryptophanMetabolism
2.30_165.0417m/z	ESI-	M-H	C6H6N4O2	3-Methylxanthine	Purines and purine derivatives
2.39_164.0709m/z	ESI-	M-H	C9H11NO2	L-Phenylalanine	L-alpha-amino acids
2.45_165.0416m/z	ESI-	M-H	C6H6N4O2	1-Methylxanthine	Purines and purine derivatives
2.69_131.0347m/z	ESI-	M-H	C5H8O4	Dimethylmalonic acid	organicacids
2.79_117.0557m/z	ESI-	M-H	C5H10O3	3-Hydroxyisovaleric acid	Hydrocarbon derivatives/Fatty acid metabolism
3.13_145.0504m/z	ESI-	M-H	C6H10O4	2,3-dimethylsuccinic acid	organicacids
3.14_203.0823m/z	ESI-	M-H	C11H12N2O2	L-Tryptophan	L-alpha-amino acids
3.27_132.0452m/z	ESI-	M-H	C8H7NO	5-Hydroxyindole	Indoles and derivatives
3.31_195.0521m/z	ESI-	M-H	C7H8N4O3	1,7-Dimethyluric acid	Purines and purine derivatives
3.46_222.0769m/z	ESI-	M-H	C11H13NO4	N-Acetyl-tyrosine	N-acyl-L-alpha-amino acids
3.53_190.0509m/z	ESI-	M-H	C10H9NO3	5-Hydroxyindolacetic acid	Indoles and derivatives/Tryptophan Metabolism
3.54_158.0822m/z	ESI-	M-H	C7H13NO3	N-Acetyl-valine	N-acyl-L-alpha-amino acids
3.62_204.0296m/z	ESI-	M-H	C10H7NO4	Xanthurenic acid	Quinolines and derivatives /tryptophan metabolism
3.74_209.0676m/z	ESI-	M-H	C8H10N4O3	1,3,7-Trimethyluric acid	Purines and purine derivatives
3.80_151.0398m/z	ESI-	M-H	C8H8O3	4-Hydroxyphenylacetic acid	Hydrocarbonderivatives
3.82_188.0350m/z	ESI-	M-H	C10H7NO3	Kynurenic acid	Quinolines and derivatives /Tryptophan Metabolism
4.12_159.0661m/z	ESI-	M-H, M-H-FA, M-H-H2O	C7H12O4	2,4-Dimethylglutaric acid	Organic acids
4.23_181.0501m/z	ESI-	M-H	C9H10O4	Homovanillic acid	Hydrocarbonderivatives/Tyrosinemetabolism
4.42_151.0415m/z	ESI-	M-H	C8H8O3	m-Hydroxyphenylacetic acid	Hydrocarbonderivatives
4.65_174.0559m/z	ESI-	M-H	C10H9NO2	Indole-3-acetic acid	Indoles and derivatives/Tryptophan Metabolism
4.66_172.0975m/z	ESI-	M-H	C8H15NO3	N-Acetyl-leucine	N-acyl-L-alpha-amino acids
4.81_165.0555m/z	ESI-	M-H	C9H10O3	DL-beta-Phenyllactic Acid	Phenylpropanoicacids/phenylalaninecatabolism
5.66_361.2028m/z	ESI-	M-H	C21H30O5	20-beta-dihydrocortisone	Steroids and steroid derivatives
5.78_363.2186m/z	ESI-	M-H	C21H32O5	5beta-dihydrocortisol	Steroids and steroid derivatives
6.01_363.2146m/z	ESI-	M-H	C21H32O5	Tetrahydrocortisone	Steroids and steroid derivatives
6.05_401.2308m/z	ESI-	M-H	C24H34O5	Dehydrocholic acid	Bile acids, alcohols and derivatives
6.19_369.1741m/z	ESI-	M-H	C19H30O5S	Epiandrosteronesulfate	Steroids and steroid derivatives
6.40_288.6185m/z	ESI-	M-2H	C26H45NO9S2	Taurochenodeoxycholic acid 3-sulfate	Bile acids, alcohols and derivatives
6.44_296.6166m/z	ESI-	M-2H	C26H45NO10S2	Taurocholic acid 3-sulfate	Bile acids, alcohols and derivatives
6.46_347.2205m/z	ESI-	M-H	C21H32O4	Tetrahydro-11-deydrocorticosterone	Steroids and steroid derivatives
6.46_514.2842m/z	ESI-	M-H	C26H45NO7S	Taurocholic acid	Bile acids, alcohols and derivatives
6.47_407.2787m/z	ESI-	M-H	C24H40O5	alfa-Muricholic acid	Bile acids, alcohols and derivatives
6.51_369.1715m/z	ESI-	M-H	C19H30O5S	Ethiocolanonesulfate	Steroids and steroid derivatives
6.59_347.2216m/z	ESI-	M-H	C21H32O4	5beta-dihydrocorticosterone	Steroids and steroid derivatives
6.62_509.2749m/z	ESI-	M-H	C27H42O9	17a-hydroxypregnanolone glucuronide	Steroids and steroid derivatives
6.63_407.2788m/z	ESI-	M-H	C24H40O5	Hyocholic acid	Bile acids, alcohols and derivatives
6.67_465.2486m/z	ESI-	M-H	C25H38O8	Ethiocholanoloneglucuronide	Steroids and steroid derivatives
6.78_464.3010m/z	ESI-	M-H	C26H43NO6	Glycocholic acid	Bile acids, alcohols and derivatives
6.86_405.2641m/z	ESI-	M-H	C24H38O5	3-Dehydrocholic acid	Bile acids, alcohols and derivatives
7.02_407.2797m/z	ESI-	M-H	C24H40O5	Cholic Acid	Bile acids, alcohols and derivatives
				25
